# Supplementary material
Source: PubMed Central journal article supplement (PMC3184204)
Supplement: NIHMS315105-supplement-1.pdf [file NIHMS315105-supplement-1.pdf]

# Supplementary Information

## Heritable *GATA2* Mutations Associated with Familial Myelodysplastic

### Syndrome and Acute Myeloid Leukemia

Christopher N. Hahn<sup>1,2</sup>, Chan-Eng Chong<sup>1,2,15</sup>, Catherine L. Carmichael<sup>3,15</sup>, Ella J. Wilkins<sup>3,13</sup>, Peter J. Brautigam<sup>1</sup>, Xiao-Chun Li<sup>1</sup>, Milena Babic<sup>1</sup>, Ming Lin<sup>1</sup>, Amandine Carmagnac<sup>3</sup>, Young K. Lee<sup>1</sup>, Chung H. Kok<sup>4,5</sup>, Lucia Gagliardi<sup>1</sup>, Kathryn L. Friend<sup>6</sup>, Paul G. Ekert<sup>7</sup>, Carolyn M. Butcher<sup>4,5</sup>, Anna L. Brown<sup>5</sup>, Ian D. Lewis<sup>2,5</sup>, L. Bik To<sup>2,5</sup>, Andrew E. Timms<sup>8</sup>, Jan Storek<sup>9</sup>, Sarah Moore<sup>1</sup>, Meryl Altree<sup>10</sup>, Robert Escher<sup>3,14</sup>, Peter G. Bardy<sup>5</sup>, Graeme K. Suthers<sup>10,11</sup>, Richard J. D'Andrea<sup>2,4,5,16</sup>, Marshall S. Horwitz<sup>8</sup> and Hamish S. Scott<sup>1,2,3,12,16</sup>

<sup>1</sup>Department of Molecular Pathology, Centre for Cancer Biology, SA Pathology, Adelaide, SA, Australia. <sup>2</sup>School of Medicine, University of Adelaide, SA, Australia. <sup>3</sup>Molecular Medicine Division, Walter and Eliza Hall Institute of Medical Research, Parkville, Vic, Australia.

<sup>4</sup>Department of Haematology and Oncology, The Queen Elizabeth Hospital, Woodville, SA, Australia. <sup>5</sup>Department of Haematology, Centre for Cancer Biology, SA Pathology, Adelaide, SA, Australia. <sup>6</sup>Department of Paediatric and Reproductive Genetics, SA Pathology, Adelaide, SA, Australia. <sup>7</sup>Cell Signalling and Cell Death Division, Walter and Eliza Hall Institute of Medical Research, Parkville, Vic, Australia. <sup>8</sup>Department of Pathology, University of Washington School of Medicine, Seattle, WA, USA. <sup>9</sup>Department of Medicine, University of Calgary, Calgary, Alberta, Canada. <sup>10</sup>SA Clinical Genetics Service, SA Pathology, Adelaide, SA, Australia.

<sup>11</sup>Department of Paediatrics, University of Adelaide, Adelaide, SA, Australia. <sup>12</sup>School of Molecular and Biomedical Science, University of Adelaide, SA, Australia. <sup>13</sup>Present Address: Neurogenetics Laboratory, Howard Florey Institute, Parkville, VIC, Australia. <sup>14</sup>Present Address: Medical Clinic, Regional Hospital Emmental, Burgdorf, Switzerland. <sup>15</sup>These authors contributed equally to this work. <sup>16</sup>These authors jointly supervised this work.

Correspondence should be addressed to H.S.S. (hamish.scott@health.sa.gov.au).

**Supplementary Figure 1. Identification of novel germline p.Thr354Met and p.Thr355del variants in the highly conserved zinc finger 2 domain of GATA2 that is associated with MDS-AML.** Sequence analysis was performed on representative AML or MDS affected individuals from the four pedigrees in Fig. 1a. **a.** p.Thr354Met and p.Thr355del germline sequence variants. A c.1061C>T heterozygous novel variation is seen in Pedigree 1, but not in wildtype (WT) sequence. An identical variation occurs in Pedigrees 2 and 3. A heterozygous c.1063-1065delACA occurs in Pedigree 4 (blue). **b.** p.Thr354 and p.Thr355 in GATA2 from different species and the corresponding Thr residues in other GATA proteins are highly conserved. These first 2 of 5 consecutive Thr residues within the zinc finger 2 domain are totally conserved in species from Human to Zebrafish and in all six GATA binding proteins.

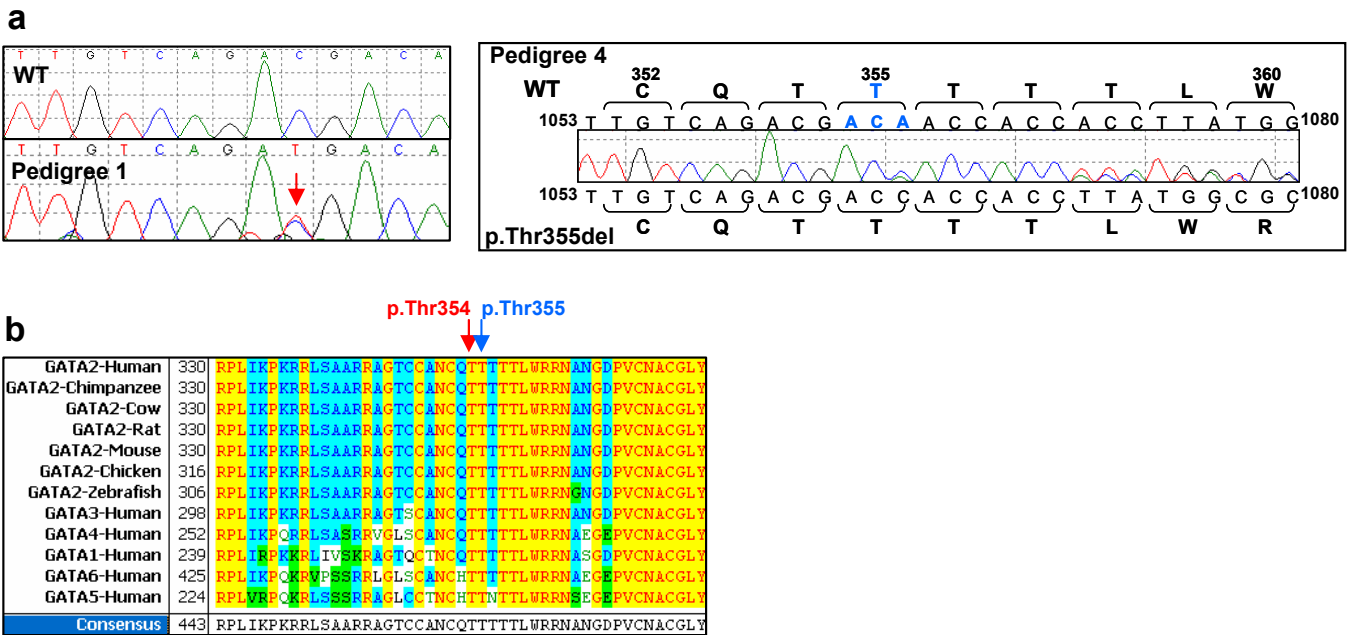

**Supplementary Figure 2. Genetic analysis of *GATA2* gene variation in familial and sporadic samples.** To screen for *GATA2* coding variants, high resolution melt across coding exons was performed on genomic DNA from human blood or bone marrow samples. **a.** Screen of *GATA2* exon 5 in 344 normal individuals; p.Thr354Met (red; Pedigree 2, III-4 and 3, IV-1) and wildtype p.Thr354 (blue). **b.** Screen of *GATA2* exon 5 in 268 AML patient samples; Pedigree 1, IV-1 with p.Thr354Met (red, duplicate) and wildtype p.Thr354 (blue). **c.** Screen of *GATA2* exon 2 in 268 AML patient samples; a unique variant c.182C>T (p.Ala61Val) was detected in one sample (red, duplicate).

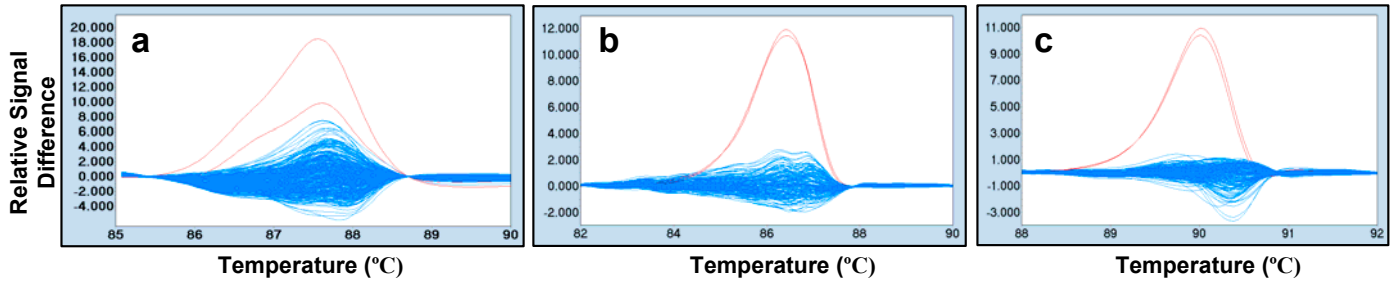

**Supplementary Figure 3. Subcellular localisation and DNA binding properties of GATA2 WT and mutants in HL-60 cells.** HL-60 cells carrying stably transduced 4HT-regulatable GATA2 (WT, p.Thr354Met and p.Leu359Val) or empty vector were treated with and without 4HT for 24 h. **a.** Western blot analysis of regulated GATA2 expression. Western blots of total cell lysate were probed for GATA2 and  $\beta$ -actin expression. **b.** Subcellular localisation of GATA2 WT and mutants. Cells from (a) were stained for GATA2 (red) and DAPI (blue). Scale bars, 10  $\mu$ m. **c.** Electromobility shift assay (EMSA)-western blot of GATA2 WT and mutants. Nuclear lysates were prepared from cells in (a) and bound to GATA binding site oligonucleotides from the human TCR $\delta$  enhancer (D), GATA consensus (C) and GM-CSF promoter (G). The probes were visualised using chemiluminescence. A neutralizing  $\alpha$ -GATA2 antibody in the far right lane specifically removes GATA2.

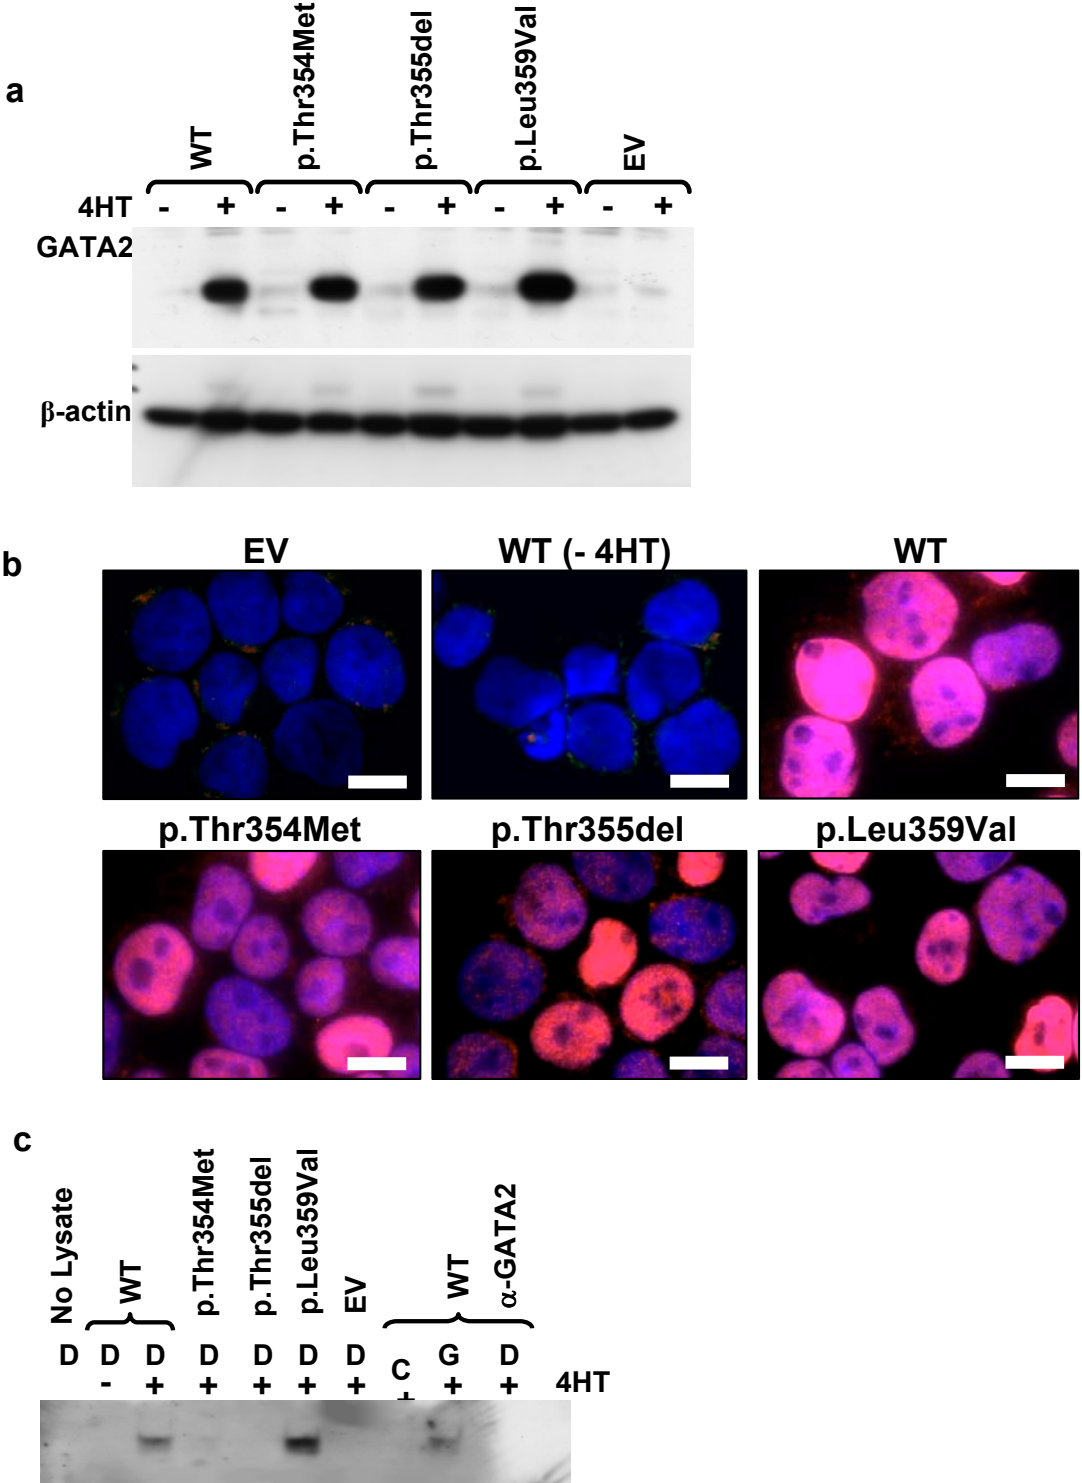

**Supplementary Figure 4. Predicted structure of GATA2 zinc finger 2 binding to DNA.** Human GATA2 ZF2 shares 97% sequence identity with human and mouse GATA3. We therefore used the known murine Gata3 ZF2 structure bound to DNA<sup>20</sup> to evaluate the effects of the observed mutations (**Supplementary Note**). The four zinc-coordinating cysteine residues are shown in purple with the zinc atom in green. Replacement of the threonine (red) at amino acid 354 in WT GATA2 with a methionine (red) disrupts interactions (circle and dotted lines) between adjacent threonines (yellow) and cysteine 349 (purple). This also introduces a bulky side-chain (dotted circle) that is predicted to alter the ZF structure or stability. Leucine 359 (blue; residue for p.Leu359Val mutation in CML BC) projects into the major groove and contacts DNA.

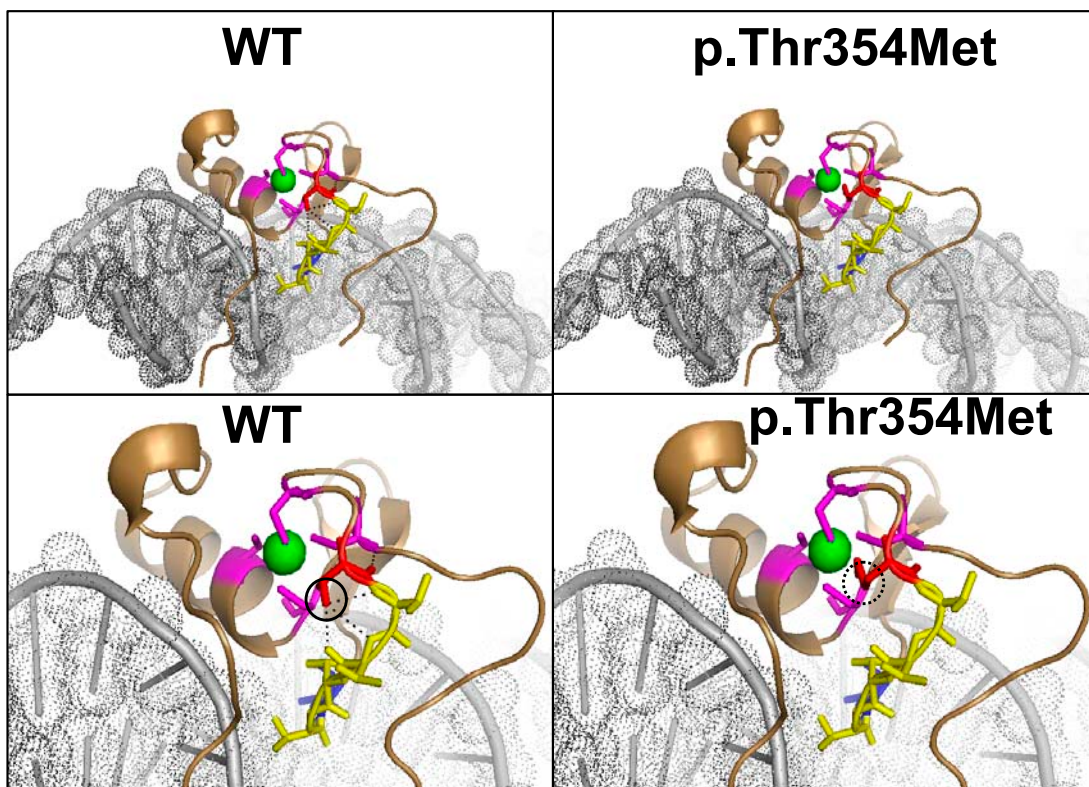

**Supplementary Figure 5. p.Thr354Met acts as a dominant negative mutation over WT GATA2 on the CD34 enhancer element.** HEK293 cells were cotransfected with consistent amounts of 1) *CD34* enhancer-LUC reporter (100 ng) and 2) WT (300 ng), with increasing amounts of 3) p.Thr354Met (0 - 600 ng). EV was added appropriately to control for promoter squelching and transfection efficiency. After 20 h, cells were harvested and luciferase assays performed and plotted (mean  $\pm$  s.e.m.) compared to EV control (\* $p < 0.05$ ; Student's t-test). A dominant negative activity of p.Thr354Met over WT became visible at a WT:p.Thr354Met mole ratio of 2:1, but became significant at and beyond a ratio of 1:1.

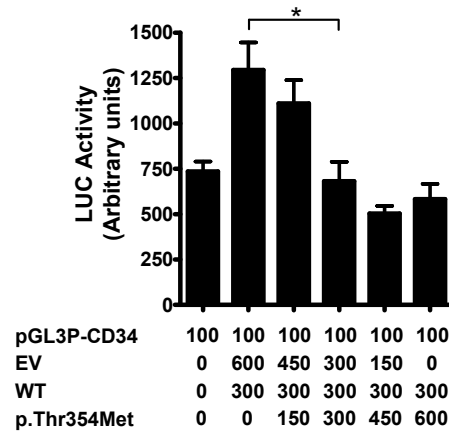

**Supplementary Figure 6. p.Thr354Met displays loss-of-function, despite opposite responses on *RUNX1* enhancer in different cell types.** HEK293 and Cos-7 cells were transiently co-transfected with EV, WT, p.Thr354Met or p.Leu359Val and the *RUNX1* enhancer element linked to a LUC reporter. After 20 h, cells were harvested and luciferase assays performed and plotted as fold (mean  $\pm$  s.e.m.) compared to EV control. p.Thr354Met displays loss-of-function compared to WT in both cell types (\* $p$ <0.05; Student's t-test).

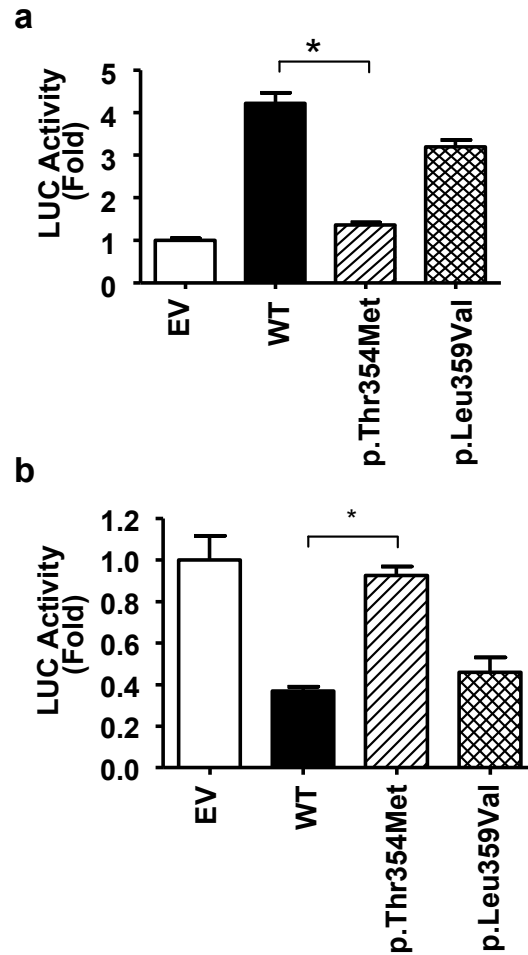

**Supplementary Figure 7. p.Thr354Met inhibits ATRA-induced differentiation.** HL-60 cells carrying stably transduced 4HT-regulatable GATA2 (WT, p.Thr354Met, p.Thr355del and p.Leu359Val) or EV were treated with or without 30 nM 4HT for 24 h and then with or without 2  $\mu$ M ATRA for 6 days. **a.** Morphological differentiation of HL-60 cells into granulocytes. HL-60 cells were hematoxylin and eosin stained and photographs taken. Scale bars, 10  $\mu$ m. **b.** CD11b expression following differentiation with ATRA. The level of surface CD11b expression was measured by FACS analysis using Phycoerythrin (PE) anti-CD11b. CD11b positive cells reside in region E. Indicative FACS plots relating to GATA2 WT (top panel – from **Figure 4a-d**) and +4HT/+ATRA (bottom panel from **Figure 4d**) are shown. **c.** Apoptosis following differentiation with ATRA. Cells were FACS analysed following staining with FITC anti-Annexin V and propidium iodide (PI). Indicative FACS plots of PI vs Annexin V relating to GATA2 WT (top panel – from **Figure 4i-m**) and +4HT/+ATRA (bottom panel from **Figure 4m**) are shown.

**Supplementary Figure 7a. Morphological differentiation of HL-60 cells into granulocytes.**

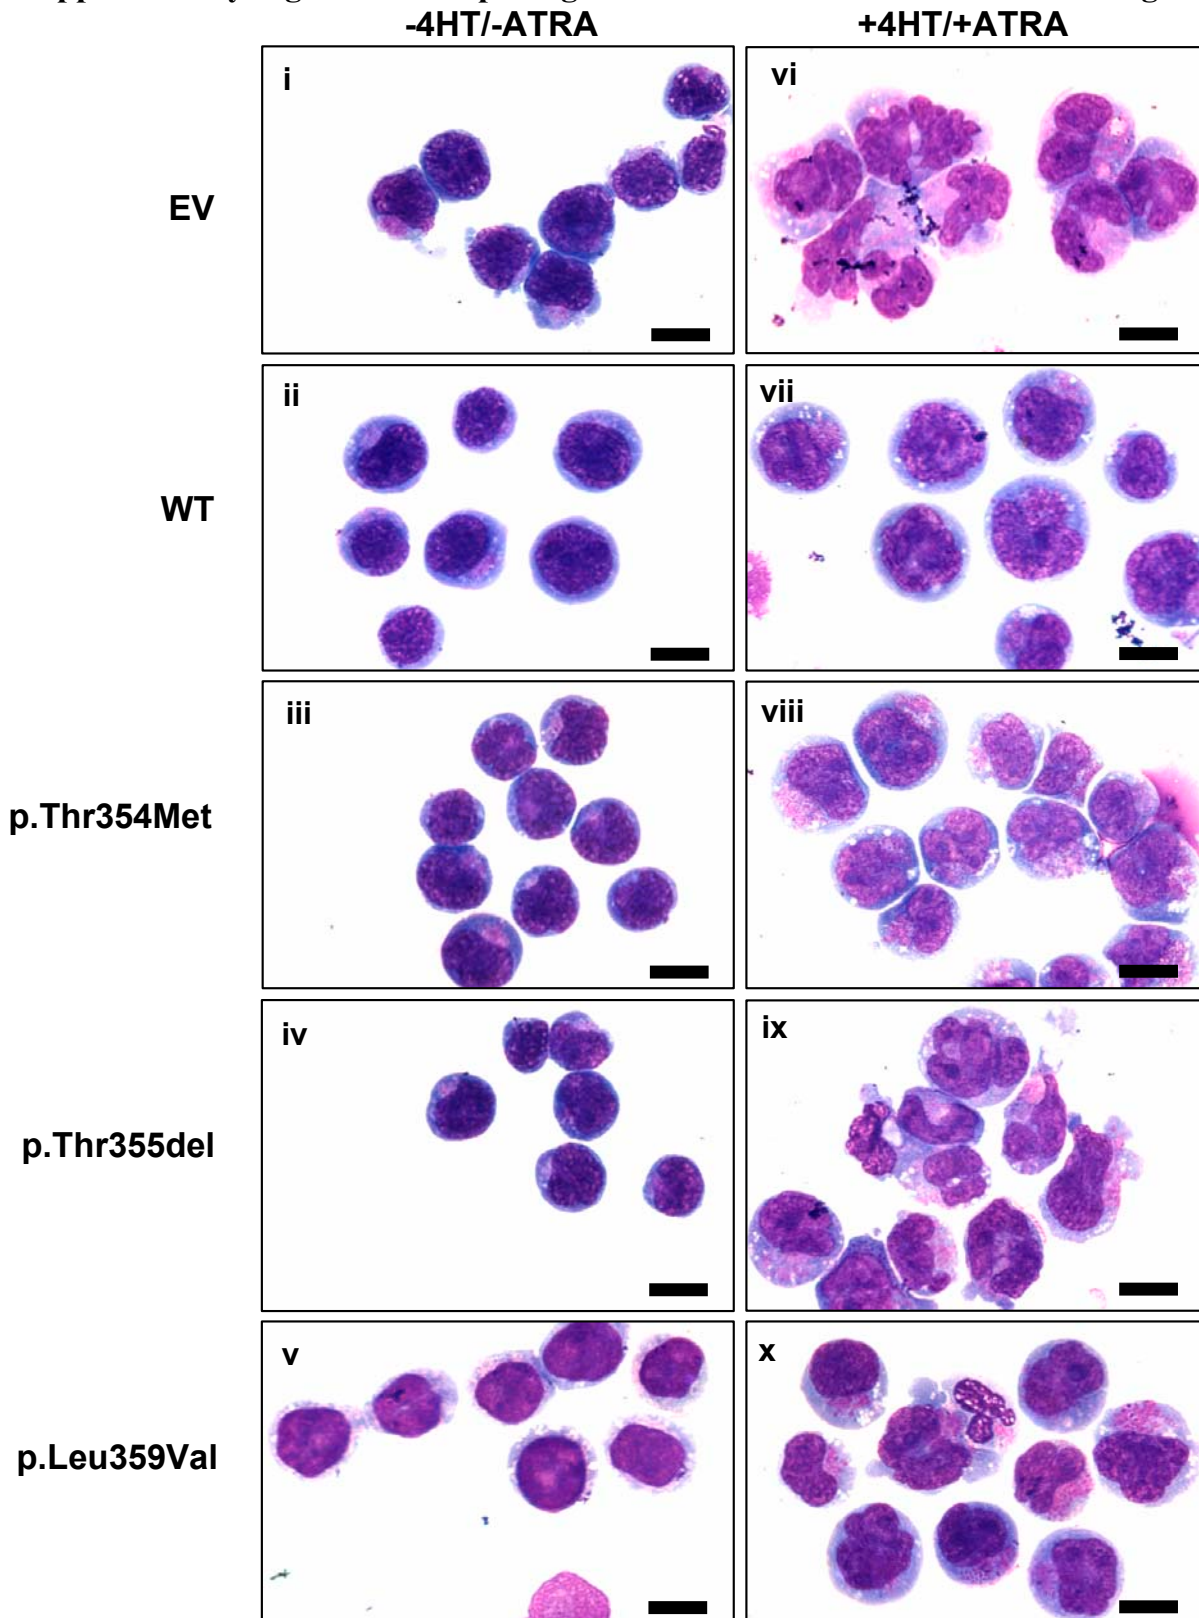



**Supplementary Figure 7b. CD11b expression following differentiation with ATRA.**  
 Density plots – CD11b vs Side Scatter.

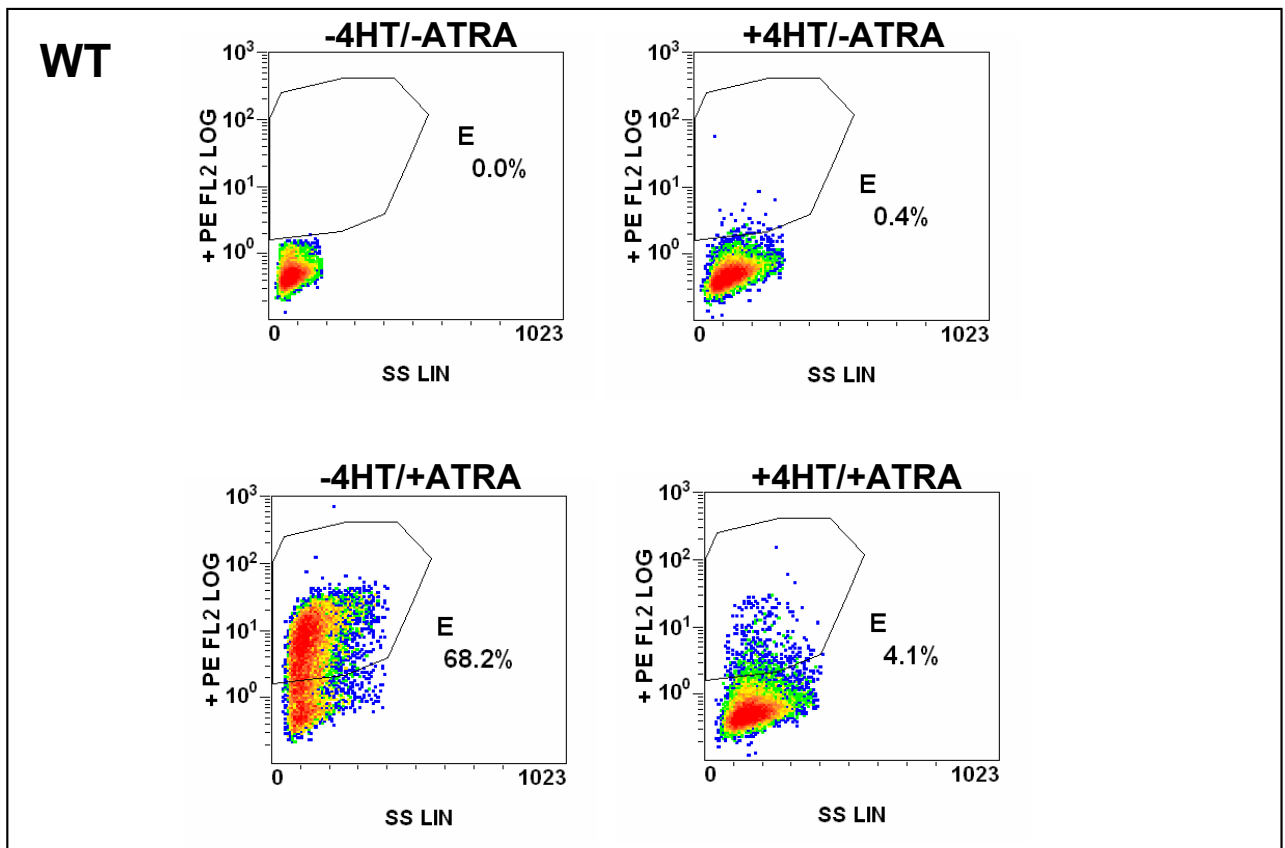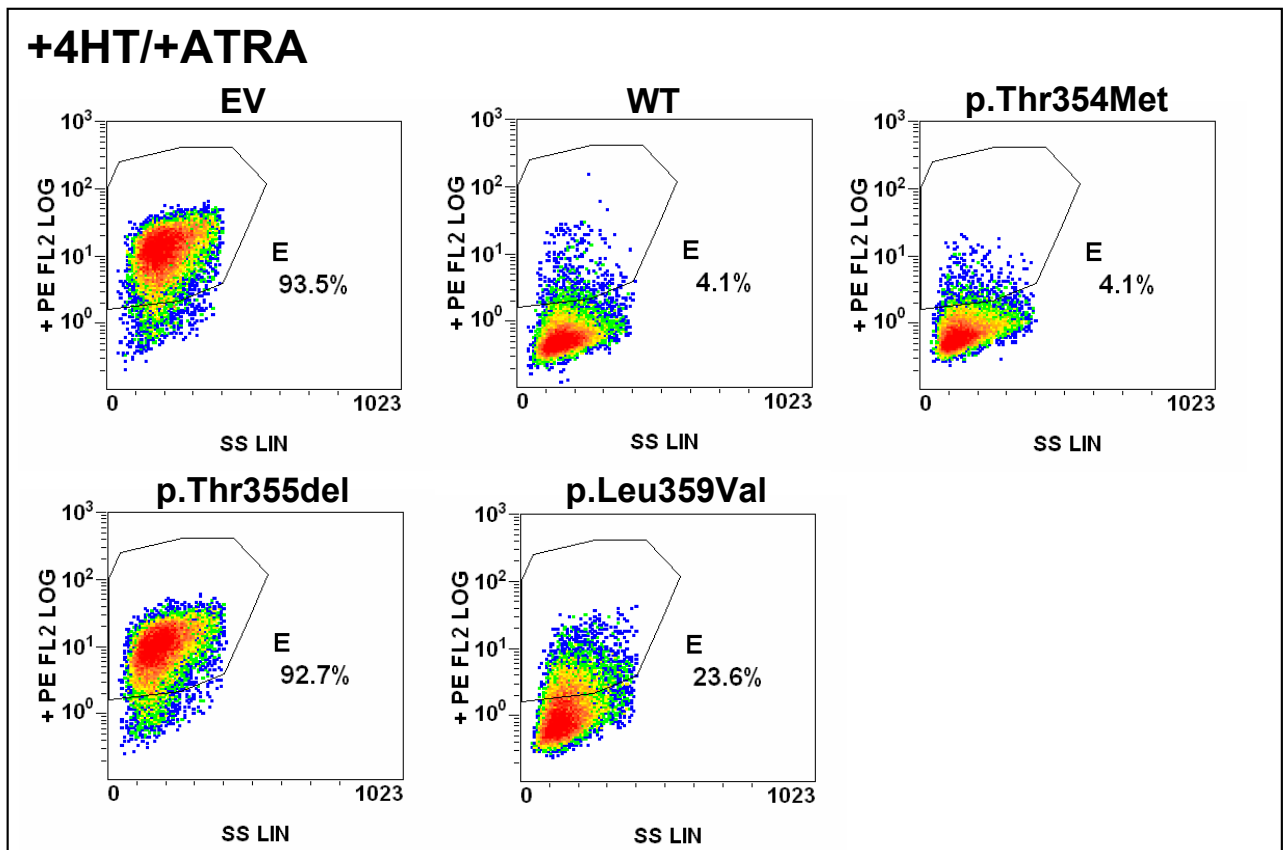

**Supplementary Figure 7c. Apoptosis following differentiation with ATRA.** Density plots – Propidium iodide vs Annexin V. Annexin V<sup>+</sup>, PI<sup>-</sup> (region I4) (black) or Annexin V<sup>+</sup>, PI<sup>+</sup> (region I2) (white).

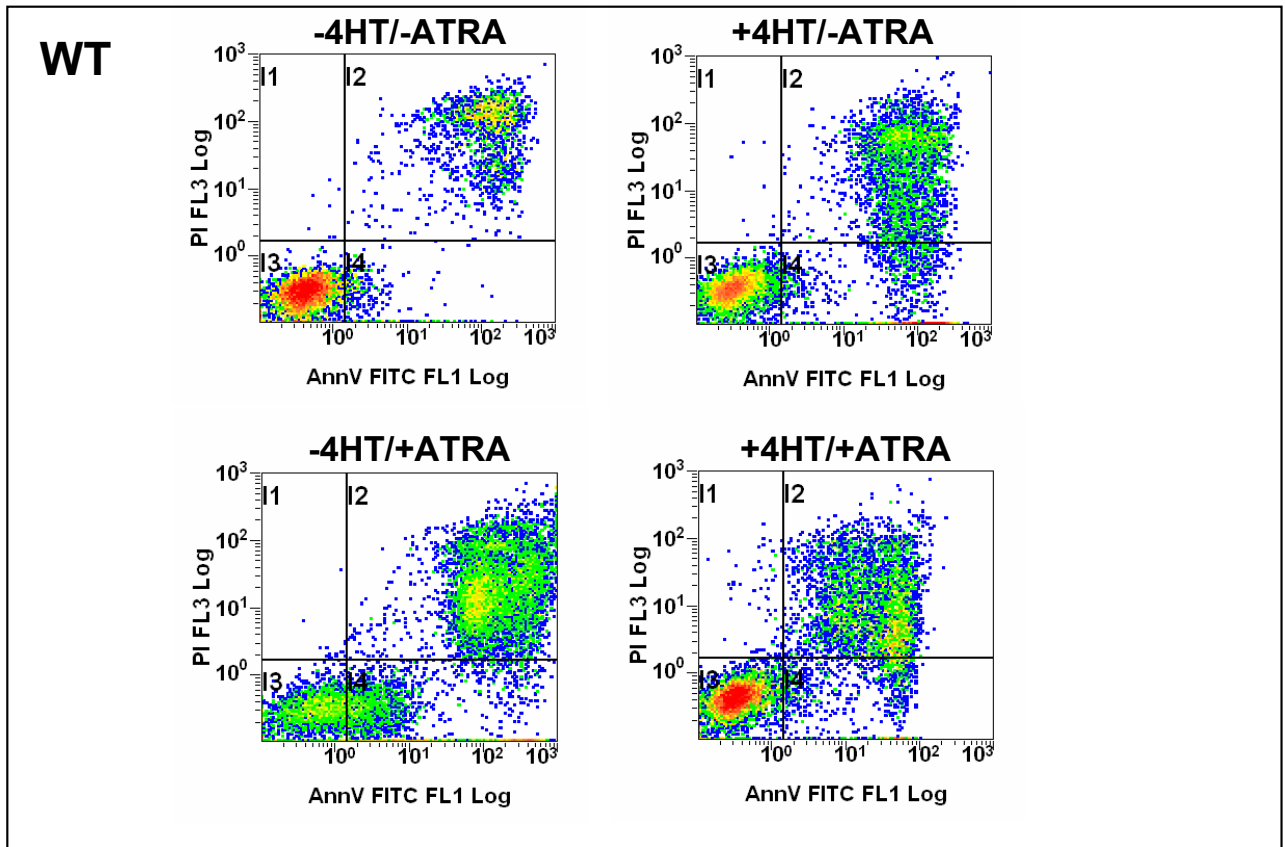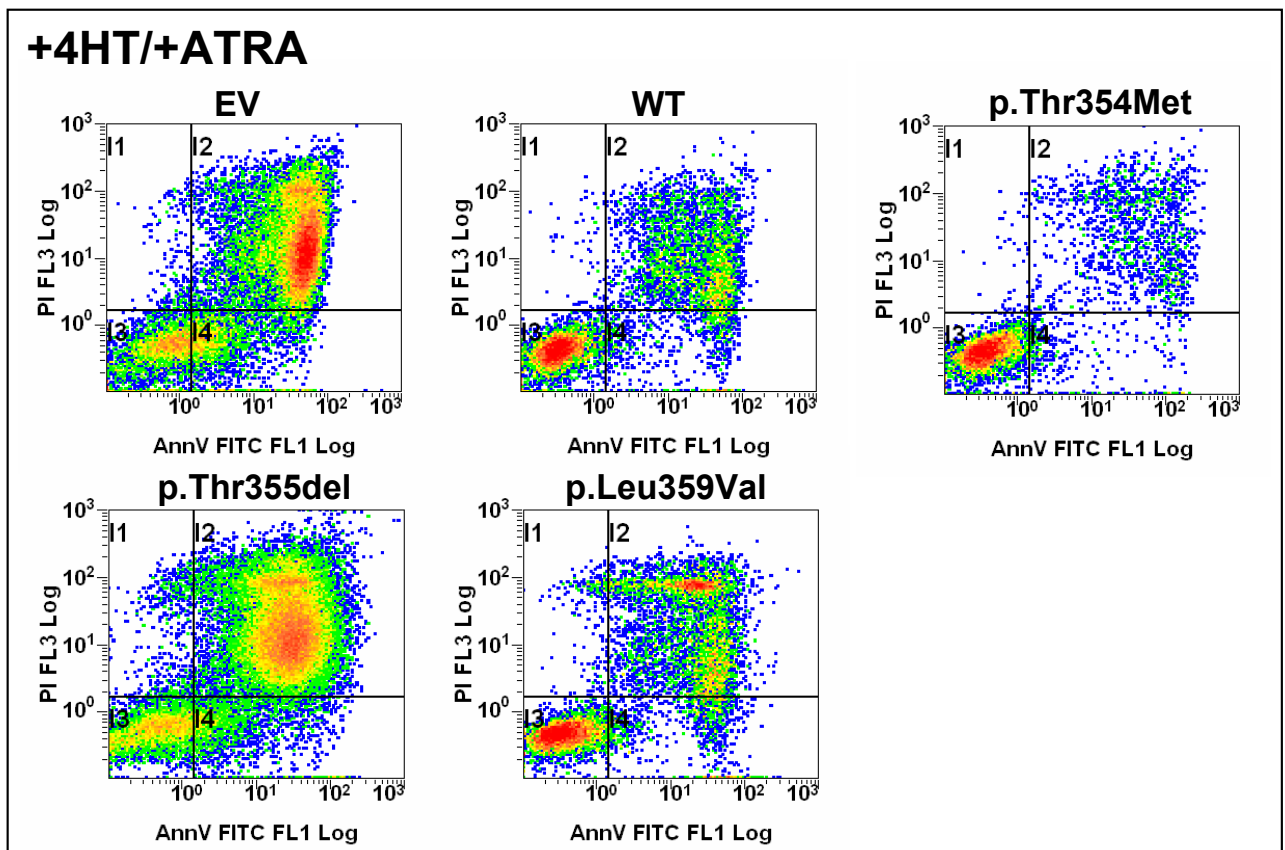

**Supplementary Figure 8. Differentially regulated genes upon expression of GATA2 WT and mutants in HL-60 cells.** HL-60 cell lines were treated with 4HT to turn on GATA2 WT and mutant protein expression. After 24 h, gene expression levels were determined between EV and GATA2 expressing cell lines (see **Supplementary Table 6**). **a.** A cluster dendrogram shows GATA2 mutants p.Thr354Met and p.Thr355del being most similar to each other and most closely related to the EV suggesting loss-of-function (retaining only 65/1,243 and 30/1,243 genes that are differentially regulated, respectively). It also shows that p.Leu359Val is quite different to these loss-of-function mutants demonstrating rather gain-of-function compared to WT. **b.** Differentially regulated genes are shown in a 4 Way Venn Diagram. **c.** The number of genes in common between any two GATA2 proteins is tabulated.

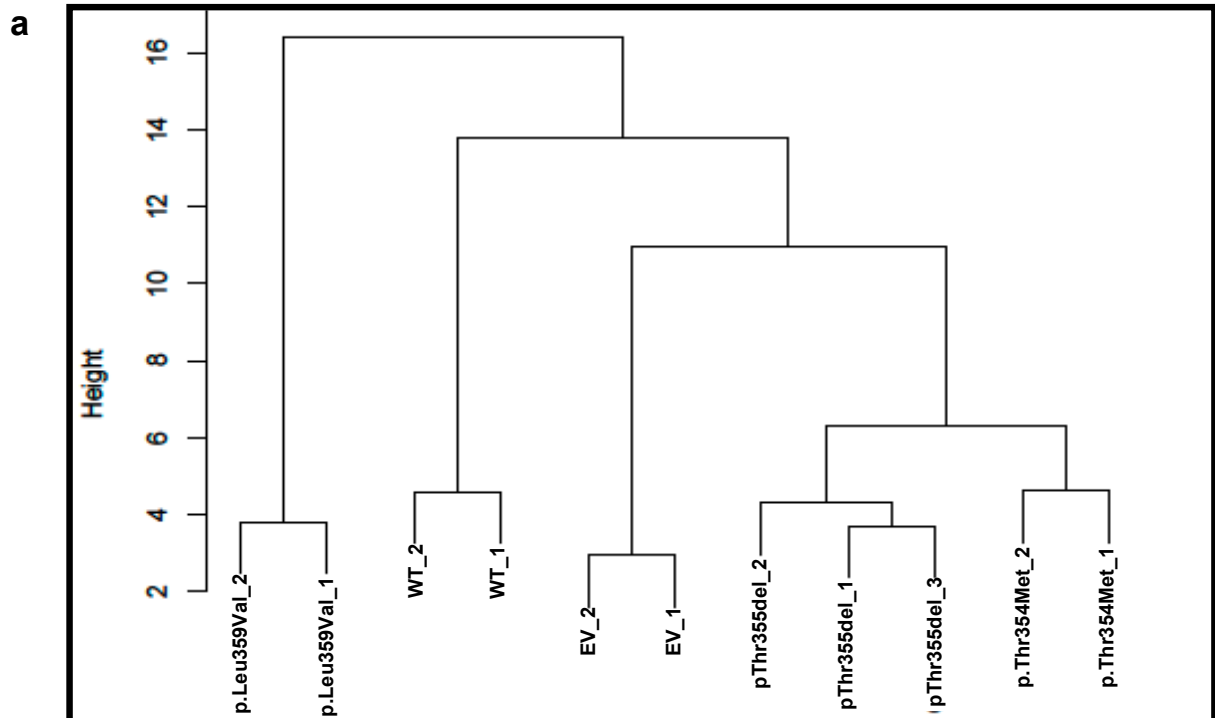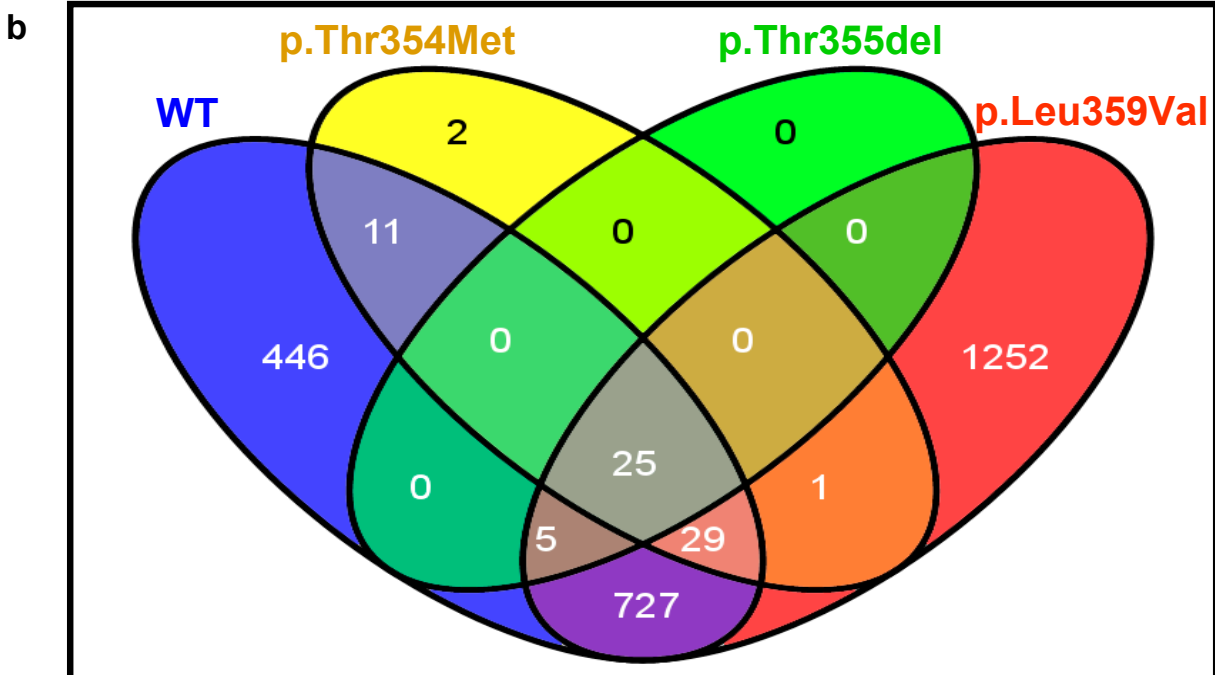

**c**

|             | WT    | p.Thr354Met | p.Thr355del | p.Leu359Val |
|-------------|-------|-------------|-------------|-------------|
| WT          | 1,243 | 65          | 30          | 786         |
| p.Thr354Met |       | 68          | 25          | 55          |
| p.Thr355del |       |             | 30          | 30          |
| p.Leu359Val |       |             |             | 2,039       |

**Supplementary Table 1. Panel of candidate oncogenic genes in AML.** Primers were designed and generated to amplify all coding exons; some exons required multiple amplicons. Primer sequences are available upon request. The sequence of the resultant amplicons was determined by DNA sequencing and this was compared to the RefSeq database to identify variants/mutations. Genes were chosen on the basis of known or predicted role in the network of hematopoietic regulators based on the following criteria: known to be mutated in familial myeloid leukemia, displaying hematopoietic expression pattern(s), a known role in hematopoiesis, a candidate myeloid transcription factor<sup>1</sup>, mutated in mouse models with hematopoietic defects, known somatic mutations in myeloid leukemia, *RUNX1* target genes or cofactors, common retroviral insertion sites, or members of the ETS transcription factor family.

| Gene            | Exons<br>(coding) | Amplicons |
|-----------------|-------------------|-----------|
| ATM             | 63                | 72        |
| BMI1            | 10 (9)            | 9         |
| CALR            | 9                 | 9         |
| CCND3           | 5                 | 5         |
| CEBPA           | 1                 | 4         |
| CEBPB           | 1                 | 3         |
| CEBPD           | 2                 | 4         |
| CEBPE           | 1                 | 3         |
| KIT             | 21                | 21        |
| CSF1R           | 22 (21)           | 22        |
| CSF3R           | 17 (15)           | 16        |
| ELF1            | 9 (8)             | 11        |
| ELF2            | 9 (8)             | 9         |
| ERG             | 11 (9)            | 12        |
| ETS1            | 8                 | 8         |
| ETS2            | 10 (9)            | 9         |
| ETV7            | 8                 | 8         |
| FIP1L1          | 18                | 18        |
| FLI1            | 11 (10)           | 30        |
| FLT3            | 24                | 24        |
| ZFPM1           | 10                | 11        |
| GATA2           | 6 (5)             | 7         |
| GATA3           | 6 (5)             | 6         |
| ID2             | 5 (2)             | 2         |
| JAK2            | 25 (23)           | 23        |
| JAK3            | 24 (23)           | 23        |
| KLF3            | 6 (5)             | 6         |
| KLF4            | 5 (4)             | 6         |
| KLF5            | 4                 | 7         |
| KLF11           | 4                 | 5         |
| KRAS2           | 6 (4)             | 4         |
| LEF1            | 12 (11)           | 11        |
| MASTL           | 12                | 15        |
| MES1            | 13 (12)           | 12        |
| MLF1            | 7                 | 7         |
| MLL             | 36                | 48        |
| MYB             | 15                | 14        |
| NBN             | 16                | 16        |
| NPM1            | 12 (11)           | 10        |
| NRAS            | 7 (4)             | 4         |
| PDGFRA          | 23 (22)           | 21        |
| PIM1            | 6                 | 6         |
| PIM2            | 6                 | 5         |
| PTPN11          | 16 (15)           | 14        |
| SPI1/PU1        | 5                 | 5         |
| RAPGEF1         | 24                | 27        |
| RUNX1           | 11                | 11        |
| SMAD3           | 9                 | 9         |
| SOX4            | 1                 | 3         |
| TAL1            | 4 (3)             | 3         |
| Total Amplicons |                   | 638       |

**Supplementary Table 2. Clinical details with genotype of individuals in four families harboring the MDS/AML-predisposing p.Thr354Met and p.Thr355del mutations.** Asterisk - FAB classification of AML if known; Leukemia - refers to non-specific leukemia; unknown - disease status unknown, BMT – bone marrow transplant. FAB classification M2, M7; refractory anemia (RA); refractory cytopenia with multilineage dysplasia (RCMD); coronary artery disease (CAD); cardiovascular accident (CVA); Cytogenetically normal (CN).

| Pedigree | Individual                                | Disease*                                                  | GATA2 Genotype     | Age at diagnosis (years) | Age of Death (years) | Karyotype |                                |
|----------|-------------------------------------------|-----------------------------------------------------------|--------------------|--------------------------|----------------------|-----------|--------------------------------|
| <b>1</b> | I-1                                       |                                                           |                    |                          |                      |           |                                |
|          | I-2                                       | <b>Leukemia</b>                                           |                    |                          | 42                   |           |                                |
|          | II-1                                      |                                                           |                    |                          | alive                |           |                                |
|          | II-2                                      | <b>MDS-AML</b>                                            |                    | 36                       | 40                   |           |                                |
|          | II-3                                      |                                                           |                    |                          | 41                   |           |                                |
|          | II-4                                      | <b>AML</b>                                                |                    |                          | 50                   |           |                                |
|          | II-5                                      | <b>AML (and ALL)</b>                                      |                    | 10                       | 10                   |           |                                |
|          | II-6                                      |                                                           |                    |                          | 68                   |           |                                |
|          | II-7                                      |                                                           |                    |                          | 62                   |           |                                |
|          | II-8                                      |                                                           |                    |                          | 78                   |           |                                |
|          | II-9                                      | <b>AML (and CML?)</b>                                     |                    | 27                       | 29                   |           |                                |
|          | III-1                                     |                                                           |                    | p.Thr354                 |                      | alive     |                                |
|          | III-2                                     | <b>MDS-AML</b>                                            |                    |                          | 16                   | 34        | 1q abnormality (isochromosome) |
|          | III-3                                     |                                                           |                    | p.Thr354                 |                      | alive     |                                |
|          | III-4                                     | <b>MDS-AML</b>                                            |                    | <b>p.Thr354Met</b>       |                      | 32        |                                |
|          | III-5                                     |                                                           |                    | <b>p.Thr354Met</b>       |                      | alive     |                                |
|          | III-6                                     |                                                           |                    |                          |                      | 54        |                                |
|          | III-7                                     |                                                           |                    | p.Thr354                 |                      | alive     |                                |
|          | III-8                                     |                                                           |                    | <b>p.Thr354Met</b>       |                      | alive     |                                |
|          | III-9                                     | <b>MDS-AML</b>                                            |                    | <b>p.Thr354Met</b>       |                      | 30        |                                |
| III-10   | <b>AML M2</b>                             |                                                           |                    | 13                       | 14                   |           |                                |
| III-11   |                                           |                                                           |                    |                          | alive                |           |                                |
| III-12   | <b>AML M2</b>                             |                                                           |                    | 19                       | 19                   |           |                                |
| III-13   | <b>Leukemia (myeloid?) , pancytopenia</b> |                                                           |                    | 18                       | 19                   |           |                                |
| IV-1     | <b>MDS-AML (received BMT)</b>             |                                                           | <b>p.Thr354Met</b> | teenager                 | alive                | -7, +21   |                                |
| IV-2     | <b>MDS-AML</b>                            |                                                           | <b>p.Thr354Met</b> | 15                       | 15                   |           |                                |
| IV-3     |                                           |                                                           | p.Thr354           |                          | alive                |           |                                |
| IV-4     |                                           |                                                           | p.Thr354           |                          | alive                |           |                                |
| IV-5     |                                           |                                                           |                    |                          | alive                |           |                                |
| IV-6     |                                           |                                                           |                    |                          | alive                |           |                                |
| IV-7     |                                           |                                                           |                    |                          | alive                |           |                                |
| IV-8     |                                           |                                                           |                    |                          | alive                |           |                                |
| <b>2</b> | I-1                                       |                                                           |                    |                          | alive                |           |                                |
|          | I-2                                       | <b>Acute Leukemia , anemia, leukopenia, splenomegally</b> |                    |                          | 46                   |           |                                |
|          | I-3                                       | unknown                                                   |                    |                          | 8 siblings           |           |                                |
|          | II-1                                      |                                                           |                    |                          | alive                |           |                                |
|          | II-2                                      | <b>AML</b>                                                |                    |                          | 22                   |           |                                |
|          | II-3                                      |                                                           |                    |                          | alive                |           |                                |
|          | II-4                                      | <b>MDS; received BMT</b>                                  |                    | <b>p.Thr354Met</b>       | 45                   | alive     | -7, +8                         |
|          | II-5                                      | <b>Atypical CML (eosinophilia), pancytopenia</b>          |                    |                          |                      | 24        |                                |
|          | II-6                                      |                                                           |                    | <b>p.Thr354Met</b>       |                      | alive     |                                |
|          | II-7                                      |                                                           |                    |                          |                      | alive     |                                |
|          | III-1                                     |                                                           |                    | p.Thr354                 |                      | alive     |                                |
|          | III-2                                     |                                                           |                    | p.Thr354                 |                      | alive     |                                |
|          | III-3                                     |                                                           |                    |                          |                      | alive     |                                |
|          | III-4                                     | <b>MDS</b>                                                |                    | <b>p.Thr354Met</b>       | 20                   | alive     | -7                             |
|          | III-5                                     |                                                           |                    | p.Thr354                 |                      | alive     |                                |
|          | III-6                                     |                                                           |                    |                          |                      | alive     |                                |
| IV-1     |                                           |                                                           |                    |                          | alive                |           |                                |

| Pedigree | Individual                                                  | Disease*                                     | GATA2 Genotype | Age at diagnosis (years) | Age of Death (years)         | Karyotype                |
|----------|-------------------------------------------------------------|----------------------------------------------|----------------|--------------------------|------------------------------|--------------------------|
| 3        | I-1                                                         | cerebral haemorrhage                         |                |                          | 49                           |                          |
|          | I-2                                                         |                                              |                |                          | 85                           |                          |
|          | II-1                                                        | pernicious anemia & congestive heart failure |                |                          | 72                           |                          |
|          | II-2                                                        | <b>Leukemia ?</b>                            | p.Thr354Met    |                          | 59                           |                          |
|          | II-3                                                        | <b>AML M2</b>                                |                |                          | 41                           |                          |
|          | II-4                                                        | macrocytic anemia & cerebral haemorrhage     | p.Thr354Met    |                          | 82                           |                          |
|          | II-5                                                        |                                              |                |                          | alive                        |                          |
|          | II-6                                                        |                                              |                |                          | alive                        |                          |
|          | II-7                                                        | haemorrhagic stroke & breast                 |                |                          | 62                           |                          |
|          | II-8                                                        | <b>Leukemia</b>                              |                | 44                       | 44                           |                          |
|          | II-9                                                        | <b>AML M2</b>                                | p.Thr354Met    | 32                       | 32                           | const. 9p21-22 variation |
|          | III-1                                                       | <b>MDS-AML M2</b>                            | p.Thr354Met    | 38                       | 42                           | CN                       |
|          | III-2                                                       |                                              |                |                          | alive (~74)                  |                          |
|          | III-3                                                       |                                              |                |                          | alive (~66)                  |                          |
|          | III-4                                                       | <b>MDS-AML</b>                               | p.Thr354Met    | 23                       | 28                           |                          |
|          | III-5                                                       | unknown                                      |                |                          | 2 siblings                   |                          |
|          | III-6                                                       | <b>MDS(RA)-AML</b>                           | p.Thr354Met    | 35                       | 40                           |                          |
|          | III-7                                                       | unknown                                      |                |                          | 2 siblings                   |                          |
|          | III-8                                                       |                                              |                |                          | alive                        |                          |
|          | III-9                                                       | well                                         | p.Thr354Met    |                          | alive (~61)                  |                          |
|          | III-10                                                      | unknown                                      |                |                          | 3 siblings                   |                          |
|          | III-11                                                      | unknown                                      |                |                          | 2 siblings                   |                          |
|          | III-12                                                      |                                              |                |                          | alive                        |                          |
|          | III-13                                                      | haemorrhagic stroke                          |                |                          | unknown                      |                          |
|          | III-14                                                      | unknown                                      |                |                          | 4 siblings                   |                          |
|          | III-15                                                      | unknown                                      |                |                          | 4 siblings                   |                          |
| IV-1     | <b>AML M7 ; BMT at 21 years</b>                             | p.Thr354Met                                  | 21             | alive (~39)              | -7, +8, t(1q;7p)             |                          |
| IV-2     | unknown                                                     |                                              |                | 2 siblings               |                              |                          |
| IV-3     | Few abnormal BM cells ( <b>MDS?</b> );<br>BM donor for IV-1 |                                              | 16             | alive (~33)              | CN                           |                          |
| IV-4     | well                                                        |                                              |                | alive                    |                              |                          |
| IV-5     | <b>MDS</b>                                                  | p.Thr354Met                                  | 15             | alive (32)               | -7, const. 9p21-22 variation |                          |
| IV-6     | well                                                        |                                              |                | alive                    |                              |                          |
| V-1      | well                                                        |                                              |                | alive                    |                              |                          |
| 4        | I-1                                                         | CAD; died CVA                                |                |                          | unknown                      |                          |
|          | I-2                                                         | died cirrhosis                               |                |                          | unknown                      |                          |
|          | II-2                                                        | <b>MDS (RCMD); BMT at 53 years</b>           | p.Thr355del    | 53                       |                              | +8 (2/20 cells)          |
|          | III-1                                                       | <b>MDS; BMT at 15 years</b>                  | p.Thr355del    | 13                       |                              | -7                       |

**Supplementary Table 3. Clinical summary of affected individuals from Pedigree 1.** Patient ID relates to Pedigree 1 (**Fig. 1a**). Age of death (Age) and diagnosis were verified with “Births, Deaths and Marriages Registries - Australia” or pathology reports. Asterisk – still alive.

| <b>Patient ID</b> | <b>Diagnosis</b>              | <b>Age</b> | <b>Verification</b> |
|-------------------|-------------------------------|------------|---------------------|
| I-2               | Leukemia                      | 42         | Death certificate   |
| II-2              | Leukemia                      | 40         | Death certificate   |
| II-4              | AML                           | 50         | Death certificate   |
| II-5              | Acute lymphocytic leukemia    | 10         | Death certificate   |
| II-9              | CML                           | 29         | Death certificate   |
| III-2             | MDS to AML                    | 38         | Pathology report    |
| III-4             | AML                           | 32         | Pathology report    |
| III-9             | MDS to AML                    | 32         | Pathology report    |
| III-10            | AML                           | 14         | Death certificate   |
| III-12            | AML                           | 19         | Death certificate   |
| III-13            | Pancytopenia                  | 19         | Death certificate   |
| IV-1              | MDS (BMT at 26 years in 2003) | 33*        | Pathology report    |
| IV-2              | MDS to AML                    | 15         | Pathology report    |

**Supplementary Table 4. Cell lines screened for *GATA2* mutations.**

| <b>Name</b>    | <b>Origin</b>        | <b>Cell Type</b>                       |
|----------------|----------------------|----------------------------------------|
| <b>Ball1</b>   | B-ALL                | B-Lymphoblastic                        |
| <b>Daudi</b>   | Burkitt's Lymphoma   | B-Lymphoblastic                        |
| <b>HL-60</b>   | AML M2               | Promyeloblastic                        |
| <b>JURKAT</b>  | T-ALL                | T-Lymphocytic                          |
| <b>K562</b>    | CML BC               | pre-Erythrocytic/Megakaryocytic blasts |
| <b>KG-1a</b>   | AML                  | Promyeloblastic                        |
| <b>KU812</b>   | CML BC               | Basophilic blasts                      |
| <b>REH</b>     | ALL (non-T; non-B)   | pre-B-Lymphoblastic                    |
| <b>U937</b>    | Histiocytic Lymphoma | Monoblastic                            |
| <b>KCL-22</b>  | CML BC               | Myeloblastic                           |
| <b>KT-1</b>    | CML BC               | Myeloblastic                           |
| <b>KYO-1</b>   | CML BC               | pre-Erythrocytic/Monocytic blasts      |
| <b>EM-2</b>    | CML BC               | Myeloblastic                           |
| <b>LAMA-84</b> | CML BC               | Erythrocytic/Megakaryocytic blasts     |
| <b>MEG-01</b>  | CML BC               | Megakaryoblastic                       |
| <b>HEK293T</b> | Embryonic kidney     | Fibroblastic                           |



**Supplementary Table 5. Haplotype analysis of p.Thr354Met mutation in three families.**

The haplotype of genomic DNA surrounding the p.Thr354Met mutation was determined by PCR sequencing of 9 selected amplicons containing a total of 50 SNPs. Shown is the name, position and genotype of 8 informative SNPs in each of the families that segregates with the c.1061C>T (p.Thr354Met) mutation. Pedigrees 1 and 2 contained a common haplotype (red) while Pedigree 3 differs (blue). *a.* Population Diversity; RefSeq SNP nucleotide and range of frequency in dbSNP in January, 2011. Asterisk; only p.Thr354Met carrying individuals in Pedigrees 1 and 2 contain these rare variations. A matched normal population screen showed 10/238 individuals heterozygous for a novel deletion of GTCT in the GATA2 promoter (-460), all of which were also heterozygous for the uncommon “T” variant of rs45463801 in the GATA2 3’UTR indicating possible linkage disequilibrium of this specific haplotype. Notably, none of these contained a p.Thr354Met mutation.

| Variants           | Position                | Population Diversity <sup>a</sup> | Pedigree 1               | Pedigree 2               | Pedigree 3 |
|--------------------|-------------------------|-----------------------------------|--------------------------|--------------------------|------------|
| rs7629791          | -17,667                 | 36-76% C                          | T                        | C/T                      | C          |
| novel              | -11,748 (-460 promoter) | 100% GTCT                         | GTCT/ <del>AGTCT</del> * | GTCT/ <del>AGTCT</del> * | GTCT       |
| <b>p.Thr354Met</b> | <b>+1 (Exon 5)</b>      | <b>100% C</b>                     | <b>T</b>                 | <b>T</b>                 | <b>T</b>   |
| rs45463801         | +1,429 (Exon 6 - 3'UTR) | 96-98% C                          | C/T*                     | C/T*                     | C          |
| rs2713590          | +7,949                  | 76-86% T                          | T                        | T                        | G          |
| rs10934854         | +8,092                  | 40-74% G                          | G                        | G                        | T          |
| rs6808807          | +8,969                  | 75-86% G                          | G                        | G                        | A          |
| rs2135644          | +9,364                  | 50-85% C                          | C                        | C                        | T          |
| rs2135645          | +9,375                  | 69-88% C                          | C                        | C                        | T          |

**Supplementary Table 6. Microarray analysis to identify differentially regulated genes following expression of GATA2 WT and mutants in HL-60 cells.** HL-60 cell lines were treated with 100 nM 4HT to turn on GATA2 WT and mutant protein expression. After 24 h, gene expression levels were determined between EV and GATA2 WT and mutant expressing cell lines (see also **Supplementary Figure 8**).

| Transcript | RefSeq Number | Symbol   | Gene Name                                                              | Status     | Fold WT | Fold L359V | Fold T354M | Fold delT355 | FDR p value WT | FDR p value L359V | FDR p value T354M | FDR p value delT355 |
|------------|---------------|----------|------------------------------------------------------------------------|------------|---------|------------|------------|--------------|----------------|-------------------|-------------------|---------------------|
| 7922174    | NM_000130     | F5       | coagulation factor V (proaccelerin, labile factor)                     | L359V only | 1.25    | 6.10       | 1.23       | 1.50         | 1.76E-01       | 6.59E-06          | 6.92E-01          | 8.73E-02            |
| 7913655    | NM_002167     | ID3      | inhibitor of DNA binding 3, dominant negative helix-loop-helix protein | L359V only | 2.25    | 4.33       | 1.58       | 1.63         | 1.50E-01       | 9.85E-03          | 8.36E-01          | 9.88E-01            |
| 8028963    | NM_000767     | CYP2B6   | cytochrome P450, family 2, subfamily B, polypeptide 6                  | L359V only | 1.19    | 4.18       | 0.96       | 1.33         | 3.90E-01       | 3.58E-05          | 9.65E-01          | 4.36E-01            |
| 8118734    | NM_002224     | ITPR3    | inositol 1,4,5-triphosphate receptor, type 3                           | L359V only | 1.33    | 3.54       | 1.03       | 1.29         | 1.09E-01       | 4.20E-05          | 9.76E-01          | 4.61E-01            |
| 8090823    | NM_005630     | SLCO2A1  | solute carrier organic anion transporter family, member 2A1            | L359V only | 0.94    | 3.51       | 0.66       | 1.07         | 9.23E-01       | 4.05E-03          | 8.01E-01          | 1.00E+00            |
| 8081564    | NM_198196     | CD96     | CD96 molecule                                                          | L359V only | 0.84    | 3.47       | 0.83       | 1.22         | 6.38E-01       | 7.79E-04          | 8.76E-01          | 1.00E+00            |
| 8028955    | NR_001278     | CYP2B7P1 | cytochrome P450, family 2, subfamily B, polypeptide 7 pseudogene 1     | L359V only | 1.58    | 3.44       | 1.17       | 1.40         | 1.17E-01       | 7.77E-04          | 8.88E-01          | 7.16E-01            |
| 8041781    | NM_001430     | EPAS1    | endothelial PAS domain protein 1                                       | L359V only | 1.57    | 3.02       | 1.07       | 1.32         | 1.04E-01       | 1.03E-03          | 9.55E-01          | 8.60E-01            |
| 8041447    | NM_016441     | CRIM1    | cysteine rich transmembrane BMP regulator 1 (chordin-like)             | L359V only | 1.24    | 2.94       | 1.01       | 1.29         | 2.58E-01       | 1.34E-04          | 9.94E-01          | 5.52E-01            |
| 7900609    | NM_001017922  | ERMAP    | erythroblast membrane-associated protein (Scianna blood group)         | L359V only | 1.39    | 2.75       | 1.07       | 1.35         | 6.88E-02       | 1.74E-04          | 9.22E-01          | 3.40E-01            |
| 8092578    | NM_004454     | ETV5     | ets variant 5                                                          | L359V only | 1.13    | 2.59       | 1.16       | 1.26         | 5.41E-01       | 1.96E-04          | 8.34E-01          | 5.78E-01            |
| 8091715    | NM_020169     | LXN      | latexin                                                                | L359V only | 1.25    | 2.52       | 1.09       | 1.32         | 2.36E-01       | 2.76E-04          | 9.01E-01          | 4.23E-01            |
| 8139128    | ---           | ---      | ---                                                                    | L359V only | 1.34    | 2.51       | 1.22       | 1.26         | 3.78E-01       | 4.67E-03          | 8.70E-01          | 1.00E+00            |
| 8122222    | NM_018945     | PDE7B    | phosphodiesterase 7B                                                   | L359V only | 1.19    | 2.39       | 1.11       | 1.27         | 1.69E-01       | 4.47E-05          | 8.25E-01          | 2.35E-01            |
| 8021301    | NM_004163     | RAB27B   | RAB27B, member RAS oncogene family                                     | L359V only | 1.95    | 2.35       | 0.90       | 1.30         | 8.68E-02       | 2.34E-02          | 9.52E-01          | 1.00E+00            |
| 8058390    | NM_213589     | RAPH1    | Ras association (RalGDS/AF-6) and pleckstrin homology domains 1        | L359V only | 1.39    | 2.32       | 1.25       | 1.32         | 7.10E-02       | 4.65E-04          | 7.28E-01          | 4.23E-01            |
| 8097801    | NM_001109977  | FAM160A1 | family with sequence similarity 160, member A1                         | L359V only | 1.69    | 2.31       | 1.23       | 1.40         | 1.26E-01       | 1.36E-02          | 8.76E-01          | 8.88E-01            |
| 8059387    | NM_024785     | FAM124B  | family with sequence similarity 124B                                   | L359V only | 1.22    | 2.28       | 1.11       | 1.28         | 4.11E-01       | 1.74E-03          | 9.01E-01          | 7.70E-01            |
| 8168524    | NM_014499     | P2RY10   | purinergic receptor P2Y, G-protein coupled, 10                         | L359V only | 1.30    | 2.25       | 0.89       | 1.17         | 5.69E-01       | 3.05E-02          | 9.43E-01          | 1.00E+00            |
| 8123929    | NM_207582     | HERV-FRD | HERV-FRD provirus ancestral Env polyprotein                            | L359V only | 1.51    | 2.24       | 1.45       | 1.41         | 1.98E-01       | 1.07E-02          | 7.38E-01          | 7.75E-01            |
| 7944335    | NM_001716     | CXCR5    | chemokine (C-X-C motif) receptor 5                                     | L359V only | 1.34    | 2.24       | 1.01       | 1.24         | 2.19E-01       | 2.44E-03          | 9.97E-01          | 9.40E-01            |
| 8099721    | NM_015187     | KIAA0746 | KIAA0746 protein                                                       | L359V only | 0.96    | 2.20       | 0.83       | 1.17         | 9.20E-01       | 4.12E-03          | 8.51E-01          | 1.00E+00            |
| 8000869    | NM_052838     | SEPT1    | septin 1                                                               | L359V only | 1.47    | 2.20       | 1.27       | 1.36         | 1.24E-01       | 3.67E-03          | 8.11E-01          | 6.55E-01            |
| 8017547    | NM_001099786  | ICAM2    | intercellular adhesion molecule 2                                      | L359V only | 1.31    | 2.20       | 1.24       | 1.31         | 1.45E-01       | 7.38E-04          | 7.50E-01          | 4.58E-01            |
| 8058498    | NM_003468     | FZD5     | frizzled homolog 5 (Drosophila)                                        | L359V only | 1.07    | 2.15       | 0.92       | 1.14         | 6.61E-01       | 8.06E-05          | 8.70E-01          | 8.36E-01            |
| 8067869    | NM_144770     | RBM11    | RNA binding motif protein 11                                           | L359V only | 1.71    | 2.13       | 1.00       | 1.36         | 1.33E-01       | 2.66E-02          | 9.99E-01          | 9.94E-01            |
| 7908388    | NM_002922     | RGS1     | regulator of G-protein signaling 1                                     | L359V only | 1.09    | 2.06       | 1.17       | 1.21         | 6.23E-01       | 3.18E-04          | 7.79E-01          | 6.07E-01            |
| 8093294    | NM_000647     | CCR2     | chemokine (C-C motif) receptor 2                                       | L359V only | 1.87    | 2.05       | 1.17       | 1.38         | 5.49E-02       | 2.23E-02          | 8.97E-01          | 8.84E-01            |
| 8079407    | NM_003965     | CCRL2    | chemokine (C-C motif) receptor-like 2                                  | L359V only | 1.47    | 2.04       | 1.13       | 1.25         | 2.07E-01       | 1.62E-02          | 9.22E-01          | 1.00E+00            |
| 8093304    | NM_003965     | CCRL2    | chemokine (C-C motif) receptor-like 2                                  | L359V only | 1.47    | 2.03       | 1.13       | 1.26         | 2.10E-01       | 1.63E-02          | 9.16E-01          | 1.00E+00            |
| 7973306    | NM_022060     | ABHD4    | abhydrolase domain containing 4                                        | L359V only | 1.43    | 2.03       | 1.13       | 1.24         | 8.73E-02       | 2.58E-03          | 8.80E-01          | 8.38E-01            |
| 7992828    | NM_001012631  | IL32     | interleukin 32                                                         | L359V only | 1.22    | 2.02       | 1.22       | 1.24         | 2.01E-01       | 5.03E-04          | 6.71E-01          | 5.05E-01            |
| 8040340    | NM_145693     | LPIN1    | lipin 1                                                                | L359V only | 1.13    | 2.01       | 0.98       | 1.16         | 4.92E-01       | 4.92E-04          | 9.77E-01          | 8.93E-01            |
| 8079383    | NM_001837     | CCR3     | chemokine (C-C motif) receptor 3                                       | L359V only | 0.99    | 2.00       | 0.96       | 1.14         | 9.49E-01       | 1.03E-04          | 9.22E-01          | 7.21E-01            |
| 8043498    | ---           | ---      | ---                                                                    | L359V only | 1.10    | 1.98       | 1.00       | 1.17         | 8.21E-01       | 2.26E-02          | 9.99E-01          | 1.00E+00            |
| 8038899    | NM_002029     | FPR1     | formyl peptide receptor 1                                              | L359V only | 0.78    | 1.97       | 0.85       | 1.03         | 2.22E-01       | 2.77E-03          | 8.38E-01          | 1.00E+00            |
| 8121405    | AK094715      | FLJ37396 | hypothetical protein FLJ37396                                          | L359V only | 1.08    | 1.97       | 1.29       | 1.20         | 8.37E-01       | 1.22E-02          | 8.13E-01          | 1.00E+00            |
| 8144802    | NM_006207     | PDGFRL   | platelet-derived growth factor receptor-like                           | L359V only | 0.97    | 1.96       | 1.03       | 1.16         | 9.32E-01       | 2.59E-03          | 9.77E-01          | 1.00E+00            |
| 7922219    | NM_000655     | SELL     | selectin L                                                             | L359V only | 1.59    | 1.95       | 1.47       | 1.29         | 1.40E-01       | 2.60E-02          | 7.23E-01          | 1.00E+00            |
| 8042468    | NM_001153     | ANXA4    | annexin A4                                                             | L359V only | 1.22    | 1.94       | 1.02       | 1.21         | 2.07E-01       | 7.05E-04          | 9.76E-01          | 6.61E-01            |
| 7999598    | NM_173474     | NTAN1    | N-terminal asparagine amidase                                          | L359V only | 1.04    | 1.92       | 0.95       | 1.15         | 8.97E-01       | 2.15E-03          | 9.44E-01          | 1.00E+00            |
| 8062557    | NM_015568     | PPP1R16B | protein phosphatase 1, regulatory (inhibitor) subunit 16B              | L359V only | 1.42    | 1.91       | 1.17       | 1.26         | 1.99E-01       | 1.42E-02          | 8.77E-01          | 9.84E-01            |
| 8014706    | NM_007144     | PCGF2    | polycomb group ring finger 2                                           | L359V only | 1.42    | 1.90       | 1.16       | 1.25         | 6.04E-02       | 2.49E-03          | 8.36E-01          | 6.95E-01            |
| 7931748    | NM_033261     | IDI2     | isopentenyl-diphosphate delta isomerase 3                              | L359V only | 0.91    | 1.90       | 0.96       | 1.12         | 7.82E-01       | 8.74E-03          | 9.76E-01          | 1.00E+00            |
| 8046380    | NM_000210     | ITGA6    | integrin, alpha 6                                                      | L359V only | 1.19    | 1.89       | 0.75       | 1.12         | 4.04E-01       | 2.63E-03          | 5.00E-01          | 1.00E+00            |
| 8142524    | NM_012338     | TSPAN12  | tetraspanin 12                                                         | L359V only | 1.06    | 1.87       | 1.22       | 1.25         | 8.08E-01       | 2.62E-03          | 7.93E-01          | 6.69E-01            |
| 8040587    | NM_014971     | EFR3B    | EFR3 homolog B (S. cerevisiae)                                         | L359V only | 1.53    | 1.86       | 1.04       | 1.21         | 1.65E-01       | 3.11E-02          | 9.80E-01          | 1.00E+00            |
| 8167603    | NM_001127899  | CLCN5    | chloride channel 5                                                     | L359V only | 1.03    | 1.84       | 0.93       | 1.11         | 8.75E-01       | 2.02E-04          | 8.64E-01          | 9.16E-01            |
| 7955562    | NM_000020     | ACVRL1   | activin A receptor type II-like 1                                      | L359V only | 1.69    | 1.83       | 1.41       | 1.34         | 6.13E-02       | 2.46E-02          | 7.24E-01          | 8.27E-01            |
| 8157905    | NM_033446     | FAM125B  | family with sequence similarity 125, member B                          | L359V only | 1.12    | 1.83       | 0.99       | 1.18         | 7.45E-01       | 1.85E-02          | 9.98E-01          | 1.00E+00            |
| 8143307    | NM_022740     | HIPK2    | homeodomain interacting protein kinase 2                               | L359V only | 1.23    | 1.81       | 1.05       | 1.11         | 9.59E-02       | 3.96E-04          | 9.30E-01          | 1.00E+00            |
| 8050427    | NM_030797     | FAM49A   | family with sequence similarity 49, member A                           | L359V only | 1.22    | 1.81       | 0.90       | 1.19         | 3.48E-01       | 5.48E-03          | 8.86E-01          | 9.92E-01            |
| 8071155    | NM_017414     | USP18    | ubiquitin specific peptidase 18                                        | L359V only | 1.38    | 1.80       | 1.05       | 1.26         | 2.88E-01       | 3.34E-02          | 9.71E-01          | 1.00E+00            |
| 8139125    | ---           | ---      | ---                                                                    | L359V only | 1.55    | 1.79       | 1.07       | 1.17         | 1.46E-01       | 4.07E-02          | 9.60E-01          | 1.00E+00            |
| 8037374    | NM_002659     | PLAUR    | plasminogen activator, urokinase receptor                              | L359V only | 1.09    | 1.78       | 1.40       | 1.19         | 5.28E-01       | 3.55E-04          | 5.45E-02          | 4.73E-01            |
| 8143247    | NM_020910     | KIAA1549 | KIAA1549                                                               | L359V only | 1.32    | 1.78       | 1.27       | 1.24         | 1.10E-01       | 3.01E-03          | 6.39E-01          | 6.55E-01            |
| 8128247    | NM_021813     | BACH2    | BTB and CNC homology 1, basic leucine zipper transcription factor 2    | L359V only | 1.05    | 1.77       | 0.88       | 1.06         | 8.64E-01       | 3.04E-03          | 8.43E-01          | 1.00E+00            |
| 7952451    | BC040288      | UNQ565   | IGYY565                                                                | L359V only | 1.79    | 1.76       | 1.14       | 1.28         | 5.56E-02       | 4.78E-02          | 9.15E-01          | 1.00E+00            |
| 8054712    | NM_000575     | IL1A     | interleukin 1, alpha                                                   | L359V only | 1.48    | 1.75       | 0.98       | 1.17         | 1.52E-01       | 3.12E-02          | 9.86E-01          | 1.00E+00            |
| 7898957    | NM_013441     | RCAN3    | RCAN family member 3                                                   | L359V only | 1.18    | 1.74       | 0.98       | 1.14         | 5.11E-01       | 1.23E-02          | 9.87E-01          | 1.00E+00            |
| 8079392    | NM_000648     | CCR2     | chemokine (C-C motif) receptor 2                                       | L359V only | 1.61    | 1.73       | 1.10       | 1.25         | 6.80E-02       | 2.81E-02          | 9.27E-01          | 9.88E-01            |

|         |                 |              |                                                                                          |            |      |      |      |      |          |          |          |          |
|---------|-----------------|--------------|------------------------------------------------------------------------------------------|------------|------|------|------|------|----------|----------|----------|----------|
| 8043443 | ENST00000390266 | LOC651751    | similar to Ig kappa chain V-II region RPMI 6410 precursor                                | L359V only | 1.17 | 1.73 | 1.19 | 1.16 | 5.74E-01 | 1.92E-02 | 8.52E-01 | 1.00E+00 |
| 7912347 | NM_001079843    | CASZ1        | castor zinc finger 1                                                                     | L359V only | 1.56 | 1.73 | 1.06 | 1.20 | 9.61E-02 | 3.25E-02 | 9.59E-01 | 1.00E+00 |
| 7973618 | NM_006084       | IRF9         | interferon regulatory factor 9                                                           | L359V only | 1.54 | 1.72 | 1.15 | 1.23 | 5.93E-02 | 1.61E-02 | 8.75E-01 | 9.45E-01 |
| 8047459 | ---             | ---          | ---                                                                                      | L359V only | 1.17 | 1.72 | 1.54 | 1.28 | 5.74E-01 | 2.05E-02 | 3.62E-01 | 8.36E-01 |
| 8043438 | ---             | ---          | ---                                                                                      | L359V only | 1.07 | 1.71 | 1.18 | 1.16 | 8.35E-01 | 1.17E-02 | 8.41E-01 | 1.00E+00 |
| 8152821 | BC070152        | CCDC26       | coiled-coil domain containing 26                                                         | L359V only | 1.56 | 1.71 | 1.38 | 1.32 | 6.96E-02 | 2.30E-02 | 6.66E-01 | 7.32E-01 |
| 7906797 | NM_001002901    | FCRLB        | Fc receptor-like B                                                                       | L359V only | 1.40 | 1.71 | 1.23 | 1.28 | 1.66E-01 | 2.17E-02 | 8.25E-01 | 8.38E-01 |
| 8133112 | ENST00000304917 | DKFZp434F142 | hypothetical protein DKFZp434F142                                                        | L359V only | 1.29 | 1.71 | 1.14 | 1.17 | 2.23E-01 | 9.91E-03 | 8.70E-01 | 1.00E+00 |
| 8014903 | NM_001042471    | GSDMB        | gasdermin B                                                                              | L359V only | 1.26 | 1.70 | 1.04 | 1.18 | 2.32E-01 | 6.70E-03 | 9.57E-01 | 9.88E-01 |
| 8133540 | NM_178831       | tcag7.1177   | opposite strand transcription unit to STAG3                                              | L359V only | 1.07 | 1.70 | 0.92 | 1.06 | 7.76E-01 | 3.86E-03 | 8.91E-01 | 1.00E+00 |
| 8140249 | NM_178831       | tcag7.1177   | opposite strand transcription unit to STAG3                                              | L359V only | 1.07 | 1.70 | 0.92 | 1.06 | 7.76E-01 | 3.86E-03 | 8.91E-01 | 1.00E+00 |
| 8090503 | ---             | ---          | ---                                                                                      | L359V only | 1.30 | 1.70 | 1.06 | 1.24 | 1.47E-01 | 5.13E-03 | 9.36E-01 | 6.56E-01 |
| 7947947 | NM_024783       | AGBL2        | ATP/GTP binding protein-like 2                                                           | L359V only | 1.26 | 1.70 | 1.04 | 1.13 | 3.32E-01 | 1.62E-02 | 9.71E-01 | 1.00E+00 |
| 8075310 | NM_002309       | LIF          | leukemia inhibitory factor (cholinergic differentiation factor)                          | L359V only | 1.49 | 1.69 | 1.10 | 1.23 | 8.37E-02 | 1.92E-02 | 9.22E-01 | 9.45E-01 |
| 7975459 | NM_015556       | SIPA1L1      | signal-induced proliferation-associated 1 like 1                                         | L359V only | 1.17 | 1.69 | 0.93 | 1.10 | 3.84E-01 | 4.42E-03 | 9.10E-01 | 1.00E+00 |
| 8086607 | NM_002343       | LTF          | lactotransferrin                                                                         | L359V only | 1.22 | 1.69 | 1.17 | 1.23 | 3.36E-01 | 9.22E-03 | 8.39E-01 | 8.36E-01 |
| 8050102 | NM_207315       | CMPK2        | cytidine monophosphate (UMP-CMP) kinase 2, mitochondrial                                 | L359V only | 1.53 | 1.69 | 1.04 | 1.17 | 9.59E-02 | 3.07E-02 | 9.74E-01 | 1.00E+00 |
| 8120222 | NM_018100       | EFHC1        | EF-hand domain (C-terminal) containing 1                                                 | L359V only | 1.30 | 1.69 | 1.01 | 1.20 | 2.55E-01 | 1.87E-02 | 9.93E-01 | 1.00E+00 |
| 8171052 | NR_024033       | IL9R         | interleukin 9 receptor                                                                   | L359V only | 1.23 | 1.68 | 1.31 | 1.16 | 5.89E-02 | 3.91E-04 | 1.07E-01 | 5.23E-01 |
| 8176972 | NR_024033       | IL9R         | interleukin 9 receptor                                                                   | L359V only | 1.23 | 1.68 | 1.31 | 1.16 | 5.89E-02 | 3.91E-04 | 1.07E-01 | 5.23E-01 |
| 7960637 | NM_020400       | LPAR5        | lysophosphatidic acid receptor 5                                                         | L359V only | 1.27 | 1.68 | 1.23 | 1.12 | 1.25E-01 | 2.60E-03 | 6.35E-01 | 1.00E+00 |
| 8160260 | NM_017637       | BNC2         | basonuclin 2                                                                             | L359V only | 1.14 | 1.68 | 0.96 | 1.10 | 4.87E-01 | 3.68E-03 | 9.54E-01 | 1.00E+00 |
| 8022378 | ---             | ---          | ---                                                                                      | L359V only | 1.15 | 1.67 | 1.02 | 1.14 | 6.43E-01 | 2.64E-02 | 9.88E-01 | 1.00E+00 |
| 8137639 | NM_018051       | WDR60        | WD repeat domain 60                                                                      | L359V only | 1.23 | 1.67 | 1.07 | 1.25 | 2.17E-01 | 3.84E-03 | 9.22E-01 | 5.69E-01 |
| 7951668 | ---             | ---          | ---                                                                                      | L359V only | 0.96 | 1.67 | 1.13 | 1.15 | 8.96E-01 | 9.10E-03 | 8.76E-01 | 1.00E+00 |
| 8131600 | NM_014399       | TSPAN13      | tetraspanin 13                                                                           | L359V only | 1.05 | 1.67 | 0.95 | 1.09 | 8.10E-01 | 2.76E-03 | 9.32E-01 | 1.00E+00 |
| 7989157 | ---             | ---          | ---                                                                                      | L359V only | 1.13 | 1.67 | 1.27 | 1.25 | 6.01E-01 | 1.01E-02 | 7.28E-01 | 7.47E-01 |
| 8042283 | NM_014181       | HSPC159      | galactin-related protein                                                                 | L359V only | 1.28 | 1.67 | 0.94 | 1.18 | 2.16E-01 | 9.46E-03 | 9.36E-01 | 1.00E+00 |
| 7965403 | NM_002345       | LUM          | lumican                                                                                  | L359V only | 1.54 | 1.67 | 1.20 | 1.26 | 1.22E-01 | 4.98E-02 | 8.69E-01 | 1.00E+00 |
| 7908351 | NM_024420       | PLA2G4A      | phospholipase A2, group IVA (cytosolic, calcium-dependent)                               | L359V only | 1.40 | 1.66 | 1.25 | 1.30 | 8.28E-02 | 9.15E-03 | 7.47E-01 | 5.44E-01 |
| 7983393 | NM_003104       | SORD         | sorbitol dehydrogenase                                                                   | L359V only | 1.04 | 1.66 | 1.17 | 1.17 | 8.22E-01 | 1.28E-03 | 7.44E-01 | 6.86E-01 |
| 8136078 | ---             | ---          | ---                                                                                      | L359V only | 1.54 | 1.66 | 1.49 | 1.35 | 5.42E-02 | 2.05E-02 | 3.84E-01 | 5.69E-01 |
| 7969640 | NM_182848       | CLDN10       | claudin 10                                                                               | L359V only | 1.34 | 1.66 | 1.03 | 1.20 | 6.57E-02 | 3.68E-03 | 9.70E-01 | 7.09E-01 |
| 8053713 | ---             | ---          | ---                                                                                      | L359V only | 1.02 | 1.65 | 1.12 | 1.10 | 9.64E-01 | 3.84E-02 | 9.12E-01 | 1.00E+00 |
| 7906764 | NM_002155       | HSPA6        | heat shock 70kDa protein 6 (HSP70B')                                                     | L359V only | 1.35 | 1.65 | 1.18 | 1.26 | 1.33E-01 | 1.15E-02 | 8.36E-01 | 7.02E-01 |
| 7903753 | NM_000848       | GSTM2        | glutathione S-transferase mu 2 (muscle)                                                  | L359V only | 1.36 | 1.65 | 1.10 | 1.19 | 1.05E-01 | 9.35E-03 | 8.99E-01 | 9.26E-01 |
| 7953532 | NM_001975       | ENO2         | enolase 2 (gamma, neuronal)                                                              | L359V only | 1.35 | 1.65 | 1.16 | 1.21 | 2.45E-01 | 3.64E-02 | 8.77E-01 | 1.00E+00 |
| 7928800 | NM_018999       | KIAA1128     | KIAA1128                                                                                 | L359V only | 1.20 | 1.64 | 1.04 | 1.07 | 3.28E-01 | 7.09E-03 | 9.60E-01 | 1.00E+00 |
| 7953409 | NM_002824       | PTMS         | parathyromosin                                                                           | L359V only | 1.34 | 1.64 | 1.13 | 1.11 | 6.09E-02 | 3.57E-03 | 8.38E-01 | 1.00E+00 |
| 8072302 | NM_153050       | MTMR3        | myotubularin related protein 3                                                           | L359V only | 1.27 | 1.63 | 1.07 | 1.16 | 5.95E-02 | 1.20E-03 | 8.90E-01 | 7.29E-01 |
| 8030277 | NM_001774       | CD37         | CD37 molecule                                                                            | L359V only | 1.31 | 1.62 | 1.24 | 1.20 | 5.27E-02 | 2.05E-03 | 4.96E-01 | 5.78E-01 |
| 7979133 | NM_007361       | NID2         | nidogen 2 (osteonidogen)                                                                 | L359V only | 1.30 | 1.62 | 1.31 | 1.21 | 5.44E-02 | 2.09E-03 | 2.64E-01 | 5.00E-01 |
| 8101449 | NM_001098540    | HPSE         | heparanase                                                                               | L359V only | 1.18 | 1.61 | 0.98 | 1.10 | 5.31E-01 | 2.91E-02 | 9.89E-01 | 1.00E+00 |
| 8128818 | NM_003931       | WASF1        | WAS protein family, member 1                                                             | L359V only | 0.77 | 1.60 | 0.82 | 1.01 | 3.26E-01 | 4.32E-02 | 8.38E-01 | 1.00E+00 |
| 7921332 | NM_005894       | CD5L         | CD5 molecule-like                                                                        | L359V only | 1.29 | 1.60 | 1.29 | 1.20 | 1.95E-01 | 1.37E-02 | 6.50E-01 | 9.09E-01 |
| 7959330 | NM_144668       | WDR66        | WD repeat domain 66                                                                      | L359V only | 1.34 | 1.60 | 1.30 | 1.23 | 1.01E-01 | 9.90E-03 | 5.58E-01 | 7.32E-01 |
| 8114593 | NM_133174       | APBB3        | amyloid beta (A4) precursor protein-binding, family B, member 3                          | L359V only | 1.22 | 1.60 | 1.17 | 1.21 | 1.19E-01 | 1.57E-03 | 7.20E-01 | 4.46E-01 |
| 8014361 | NM_005064       | CCL23        | chemokine (C-C motif) ligand 23                                                          | L359V only | 1.07 | 1.60 | 0.99 | 1.13 | 8.25E-01 | 2.91E-02 | 9.95E-01 | 1.00E+00 |
| 8090018 | NM_031458       | PARP9        | poly (ADP-ribose) polymerase family, member 9                                            | L359V only | 1.55 | 1.60 | 1.02 | 1.22 | 5.27E-02 | 2.92E-02 | 9.89E-01 | 9.88E-01 |
| 8042827 | ---             | ---          | ---                                                                                      | L359V only | 1.22 | 1.60 | 1.12 | 1.15 | 3.79E-01 | 2.37E-02 | 8.86E-01 | 1.00E+00 |
| 8035278 | NM_020959       | ANO8         | anoctamin 8                                                                              | L359V only | 1.25 | 1.59 | 1.09 | 1.15 | 2.51E-01 | 1.39E-02 | 9.07E-01 | 1.00E+00 |
| 8002571 | NM_015020       | PHLPP1       | PH domain and leucine rich repeat protein phosphatase-like                               | L359V only | 1.31 | 1.59 | 1.02 | 1.15 | 2.77E-01 | 4.30E-02 | 9.92E-01 | 1.00E+00 |
| 7899160 | NM_001803       | CD52         | CD52 molecule                                                                            | L359V only | 1.16 | 1.59 | 1.24 | 1.13 | 3.90E-01 | 6.42E-03 | 6.71E-01 | 1.00E+00 |
| 8043433 | ENST00000390266 | LOC651751    | similar to Ig kappa chain V-II region RPMI 6410 precursor                                | L359V only | 1.09 | 1.59 | 1.20 | 1.15 | 7.70E-01 | 3.20E-02 | 8.38E-01 | 1.00E+00 |
| 8100426 | ---             | ---          | ---                                                                                      | L359V only | 1.31 | 1.59 | 1.52 | 1.30 | 1.45E-01 | 1.16E-02 | 1.45E-01 | 4.78E-01 |
| 8155930 | NM_001490       | GCNT1        | glucosaminyl (N-acetyl) transferase 1, core 2 (beta-1,6-N-acetylglucosaminyltransferase) | L359V only | 1.26 | 1.59 | 1.08 | 1.19 | 1.54E-01 | 6.15E-03 | 9.06E-01 | 8.17E-01 |
| 8096176 | NM_080683       | PTPN13       | protein tyrosine phosphatase, non-receptor type 13 (APO-1)                               | L359V only | 1.20 | 1.59 | 1.08 | 1.19 | 2.91E-01 | 6.93E-03 | 9.02E-01 | 8.02E-01 |
| 8021768 | NM_005786       | TSHZ1        | teashirt zinc finger homeobox 1                                                          | L359V only | 0.91 | 1.58 | 1.04 | 1.06 | 6.40E-01 | 9.15E-03 | 9.60E-01 | 1.00E+00 |
| 7955142 | NM_000725       | CACNB3       | calcium channel, voltage-dependent, beta 3 subunit                                       | L359V only | 1.19 | 1.58 | 0.95 | 1.07 | 4.09E-01 | 1.62E-02 | 9.51E-01 | 1.00E+00 |
| 8003991 | NM_153827       | MINK1        | misshapen-like kinase 1 (zebrafish)                                                      | L359V only | 1.24 | 1.58 | 1.07 | 1.15 | 1.45E-01 | 3.88E-03 | 9.06E-01 | 9.04E-01 |
| 7935882 | NM_022039       | FBXW4        | F-box and WD repeat domain containing 4                                                  | L359V only | 1.23 | 1.58 | 1.06 | 1.18 | 1.79E-01 | 5.12E-03 | 9.17E-01 | 8.08E-01 |
| 7994981 | NM_152288       | ORAI3        | ORAI calcium release-activated calcium modulator 3                                       | L359V only | 1.28 | 1.57 | 1.14 | 1.21 | 5.93E-02 | 2.45E-03 | 8.09E-01 | 4.69E-01 |
| 8048381 | NM_015690       | STK36        | serine                                                                                   | L359V only | 1.06 | 1.57 | 0.98 | 1.07 | 7.75E-01 | 4.31E-03 | 9.81E-01 | 1.00E+00 |
| 7996022 | NM_002990       | CCL22        | chemokine (C-C motif) ligand 22                                                          | L359V only | 1.00 | 1.57 | 1.06 | 1.02 | 9.98E-01 | 2.52E-02 | 9.52E-01 | 1.00E+00 |
| 7908597 | NM_205860       | NR5A2        | nuclear receptor subfamily 5, group A, member 2                                          | L359V only | 0.88 | 1.57 | 1.02 | 1.05 | 5.81E-01 | 1.62E-02 | 9.82E-01 | 1.00E+00 |

|         |                 |              |                                                                                |            |      |      |      |      |          |          |          |          |
|---------|-----------------|--------------|--------------------------------------------------------------------------------|------------|------|------|------|------|----------|----------|----------|----------|
| 8095422 | NM_003154       | STATH        | statherin                                                                      | L359V only | 0.85 | 1.56 | 0.98 | 1.04 | 5.41E-01 | 3.77E-02 | 9.88E-01 | 1.00E+00 |
| 8008885 | AY699265        | MIR21        | microRNA 21                                                                    | L359V only | 1.22 | 1.56 | 1.44 | 1.25 | 2.12E-01 | 6.60E-03 | 1.45E-01 | 4.97E-01 |
| 8048898 | NM_007237       | SP140        | SP140 nuclear body protein                                                     | L359V only | 1.49 | 1.56 | 1.15 | 1.24 | 5.51E-02 | 2.47E-02 | 8.64E-01 | 8.36E-01 |
| 8084742 | NM_005578       | LPP          | LIM domain containing preferred translocation partner in lipoma                | L359V only | 1.26 | 1.56 | 0.96 | 1.11 | 7.02E-02 | 2.15E-03 | 9.32E-01 | 1.00E+00 |
| 8138084 | ---             | ---          | ---                                                                            | L359V only | 1.30 | 1.55 | 1.11 | 1.15 | 2.21E-01 | 2.69E-02 | 8.91E-01 | 1.00E+00 |
| 8002830 | NM_153486       | LDHD         | lactate dehydrogenase D                                                        | L359V only | 1.27 | 1.55 | 1.12 | 1.17 | 8.48E-02 | 3.43E-03 | 8.34E-01 | 7.05E-01 |
| 8142886 | NM_003344       | UBE2H        | ubiquitin-conjugating enzyme E2H (UBC8 homolog, yeast)                         | L359V only | 1.37 | 1.55 | 1.11 | 1.18 | 5.32E-02 | 8.41E-03 | 8.75E-01 | 8.84E-01 |
| 7934459 | NM_003635       | NDST2        | N-deacetylase                                                                  | L359V only | 1.28 | 1.55 | 1.06 | 1.13 | 7.87E-02 | 3.68E-03 | 9.25E-01 | 9.79E-01 |
| 8113666 | NM_020796       | SEMA6A       | sema domain, transmembrane domain (TM), and cytoplasmic domain, (semaphorin)   | L359V only | 0.95 | 1.55 | 0.85 | 1.02 | 8.46E-01 | 1.23E-02 | 8.19E-01 | 1.00E+00 |
| 8134122 | NM_005751       | AKAP9        | A kinase (PRKA) anchor protein (ytotiao) 9                                     | L359V only | 1.43 | 1.55 | 1.28 | 1.26 | 8.33E-02 | 2.64E-02 | 7.28E-01 | 7.46E-01 |
| 8013776 | NM_018182       | C17orf63     | chromosome 17 open reading frame 63                                            | L359V only | 1.20 | 1.55 | 1.04 | 1.03 | 1.22E-01 | 1.52E-03 | 9.31E-01 | 1.00E+00 |
| 8028656 | NM_022835       | PLEKHG2      | pleckstrin homology domain containing, family G (with RhoGef domain) member 2  | L359V only | 1.31 | 1.55 | 1.00 | 1.09 | 1.21E-01 | 1.24E-02 | 9.99E-01 | 1.00E+00 |
| 8040725 | NM_020134       | DPYSL5       | dihydropyrimidinase-like 5                                                     | L359V only | 1.00 | 1.55 | 1.03 | 1.10 | 9.89E-01 | 1.74E-02 | 9.74E-01 | 1.00E+00 |
| 8046895 | NM_177454       | FAM171B      | family with sequence similarity 171, member B                                  | L359V only | 1.12 | 1.55 | 1.01 | 1.16 | 6.00E-01 | 1.44E-02 | 9.93E-01 | 1.00E+00 |
| 8058415 | NM_017759       | INO80D       | INO80 complex subunit D                                                        | L359V only | 1.10 | 1.55 | 1.00 | 1.08 | 4.27E-01 | 1.18E-03 | 1.00E+00 | 1.00E+00 |
| 8087485 | NM_003335       | UBA7         | ubiquitin-like modifier activating enzyme 7                                    | L359V only | 1.20 | 1.55 | 0.97 | 1.07 | 2.82E-01 | 9.15E-03 | 9.75E-01 | 1.00E+00 |
| 7909610 | NM_001040619    | ATF3         | activating transcription factor 3                                              | L359V only | 1.09 | 1.54 | 1.11 | 1.18 | 6.71E-01 | 6.93E-03 | 8.68E-01 | 7.90E-01 |
| 7908161 | NM_030806       | C1orf21      | chromosome 1 open reading frame 21                                             | L359V only | 1.08 | 1.54 | 0.96 | 1.12 | 6.04E-01 | 1.97E-03 | 9.27E-01 | 9.15E-01 |
| 7953626 | NM_014718       | CLSTN3       | calsyntenin 3                                                                  | L359V only | 1.26 | 1.54 | 1.10 | 1.12 | 1.39E-01 | 7.40E-03 | 8.74E-01 | 1.00E+00 |
| 8103064 | NM_031956       | TTC29        | tetratricopeptide repeat domain 29                                             | L359V only | 1.10 | 1.54 | 1.09 | 1.16 | 5.63E-01 | 4.94E-03 | 8.84E-01 | 8.44E-01 |
| 7961673 | NM_021957       | GYS2         | glycogen synthase 2 (liver)                                                    | L359V only | 0.94 | 1.54 | 0.99 | 1.06 | 8.11E-01 | 1.61E-02 | 9.94E-01 | 1.00E+00 |
| 7973629 | NM_001048205    | REC8         | REC8 homolog (yeast)                                                           | L359V only | 1.21 | 1.54 | 1.06 | 1.13 | 1.30E-01 | 2.63E-03 | 8.97E-01 | 9.01E-01 |
| 8096385 | NM_014606       | HERC3        | hect domain and RLD 3                                                          | L359V only | 1.20 | 1.54 | 0.99 | 1.13 | 2.51E-01 | 6.74E-03 | 9.90E-01 | 1.00E+00 |
| 8029219 | NM_173633       | TMEM145      | transmembrane protein 145                                                      | L359V only | 1.13 | 1.54 | 1.17 | 1.16 | 6.13E-01 | 2.24E-02 | 8.38E-01 | 1.00E+00 |
| 7897277 | BC030279        | C1orf211     | chromosome 1 open reading frame 211                                            | L359V only | 1.40 | 1.54 | 1.12 | 1.25 | 9.07E-02 | 2.40E-02 | 8.85E-01 | 7.38E-01 |
| 7978760 | NM_017658       | KLHL28       | kelch-like 28 (Drosophila)                                                     | L359V only | 1.29 | 1.53 | 1.16 | 1.20 | 1.27E-01 | 1.11E-02 | 8.23E-01 | 8.01E-01 |
| 8111430 | NM_014324       | AMACR        | alpha-methylacyl-CoA racemase                                                  | L359V only | 1.14 | 1.53 | 1.01 | 1.14 | 3.96E-01 | 6.22E-03 | 9.94E-01 | 9.88E-01 |
| 8111524 | NM_174914       | UGT3A2       | UDP glycosyltransferase 3 family, polypeptide A2                               | L359V only | 0.97 | 1.53 | 1.02 | 1.09 | 9.24E-01 | 1.59E-02 | 9.85E-01 | 1.00E+00 |
| 8082314 | NM_032242       | PLXNA1       | plexin A1                                                                      | L359V only | 1.14 | 1.52 | 1.13 | 1.16 | 2.45E-01 | 1.33E-03 | 7.74E-01 | 5.63E-01 |
| 8120043 | NM_001024630    | RUNX2        | runt-related transcription factor 2                                            | L359V only | 1.36 | 1.52 | 1.27 | 1.18 | 5.11E-02 | 8.88E-03 | 5.20E-01 | 8.11E-01 |
| 8029701 | NM_001080401    | FLJ40125     | hypothetical protein FLJ40125                                                  | L359V only | 1.27 | 1.52 | 1.11 | 1.15 | 3.16E-01 | 4.76E-02 | 9.02E-01 | 1.00E+00 |
| 7977933 | NM_012244       | SLC7A8       | solute carrier family 7 (cationic amino acid transporter, y+ system), member 8 | L359V only | 0.76 | 1.52 | 0.73 | 0.89 | 5.43E-02 | 5.34E-03 | 1.72E-01 | 1.00E+00 |
| 7961215 | NM_018423       | STYK1        | serine                                                                         | L359V only | 1.35 | 1.51 | 1.03 | 1.14 | 5.16E-02 | 7.85E-03 | 9.60E-01 | 9.81E-01 |
| 7952950 | ENST00000318291 | LOC100049716 | hypothetical protein LOC100049716                                              | L359V only | 1.19 | 1.51 | 1.00 | 1.12 | 2.75E-01 | 9.46E-03 | 9.99E-01 | 1.00E+00 |
| 8042251 | NM_014562       | OTX1         | orthodenticle homeobox 1                                                       | L359V only | 1.10 | 1.51 | 1.16 | 1.10 | 6.23E-01 | 1.11E-02 | 8.14E-01 | 1.00E+00 |
| 7971602 | NM_018191       | RCBTB1       | regulator of chromosome condensation (RCC1) and BTB (POZ) domain containing p  | L359V only | 1.27 | 1.51 | 1.05 | 1.21 | 7.29E-02 | 4.12E-03 | 9.29E-01 | 5.08E-01 |
| 8128939 | NM_147686       | TRAF3IP2     | TRAF3 interacting protein 2                                                    | L359V only | 1.16 | 1.51 | 1.08 | 1.13 | 4.47E-01 | 1.72E-02 | 9.15E-01 | 1.00E+00 |
| 8032509 | NM_052847       | GNG7         | guanine nucleotide binding protein (G protein), gamma 7                        | L359V only | 1.06 | 1.51 | 0.96 | 1.07 | 7.93E-01 | 8.37E-03 | 9.44E-01 | 1.00E+00 |
| 7941639 | NM_024649       | BBS1         | Bardet-Biedl syndrome 1                                                        | L359V only | 1.15 | 1.50 | 1.06 | 1.13 | 2.69E-01 | 3.33E-03 | 8.98E-01 | 8.95E-01 |
| 8054166 | NM_025244       | TSGA10       | testis specific, 10                                                            | L359V only | 1.35 | 1.50 | 1.11 | 1.19 | 6.28E-02 | 1.12E-02 | 8.68E-01 | 7.75E-01 |
| 7961595 | NM_024730       | RERGL        | RERGL                                                                          | L359V only | 1.06 | 1.50 | 1.08 | 1.13 | 8.19E-01 | 1.68E-02 | 9.14E-01 | 1.00E+00 |
| 7978331 | NM_001039771    | CBLN3        | cerebellin 3 precursor                                                         | L359V only | 0.99 | 1.50 | 0.98 | 1.07 | 9.84E-01 | 1.55E-02 | 9.77E-01 | 1.00E+00 |
| 7945550 | NM_018494       | LRDD         | leucine-rich repeats and death domain containing                               | L359V only | 1.20 | 1.50 | 1.05 | 1.10 | 1.27E-01 | 2.87E-03 | 9.12E-01 | 1.00E+00 |
| 7999468 | NM_004862       | LITAF        | lipopolysaccharide-induced TNF factor                                          | L359V only | 0.97 | 1.49 | 1.10 | 1.10 | 8.66E-01 | 2.28E-03 | 8.35E-01 | 9.99E-01 |
| 7992518 | NM_014353       | RAB26        | RAB26, member RAS oncogene family                                              | L359V only | 1.28 | 1.49 | 1.19 | 1.21 | 1.04E-01 | 8.80E-03 | 7.38E-01 | 6.27E-01 |
| 8011734 | NM_000080       | CHRNE        | cholinergic receptor, nicotinic, epsilon                                       | L359V only | 1.08 | 1.49 | 1.12 | 1.15 | 7.27E-01 | 1.43E-02 | 8.58E-01 | 1.00E+00 |
| 8158317 | NM_001130438    | SPTAN1       | spectrin, alpha, non-erythrocytic 1 (alpha-fodrin)                             | L359V only | 1.15 | 1.49 | 0.97 | 1.11 | 2.84E-01 | 3.67E-03 | 9.59E-01 | 1.00E+00 |
| 8138741 | NM_024014       | HOXA6        | homeobox A6                                                                    | L359V only | 1.19 | 1.49 | 1.16 | 1.18 | 2.13E-01 | 5.91E-03 | 7.80E-01 | 6.73E-01 |
| 7906900 | AY423733        | DDR2         | discoidin domain receptor tyrosine kinase 2                                    | L359V only | 1.01 | 1.49 | 1.16 | 1.15 | 9.69E-01 | 4.84E-02 | 8.64E-01 | 1.00E+00 |
| 8139873 | NM_181722       | LOC285908    | hypothetical protein LOC285908                                                 | L359V only | 1.14 | 1.49 | 1.00 | 1.09 | 5.76E-01 | 3.23E-02 | 1.00E+00 | 1.00E+00 |
| 8045604 | NM_018328       | MBD5         | methyl-CpG binding domain protein 5                                            | L359V only | 1.26 | 1.48 | 1.01 | 1.09 | 1.31E-01 | 1.13E-02 | 9.87E-01 | 1.00E+00 |
| 8167287 | NM_022825       | PORCN        | porcupine homolog (Drosophila)                                                 | L359V only | 1.16 | 1.48 | 1.13 | 1.08 | 3.99E-01 | 1.51E-02 | 8.40E-01 | 1.00E+00 |
| 8097670 | NM_172250       | MMAA         | methylmalonic aciduria (cobalamin deficiency) cblA type                        | L359V only | 0.96 | 1.48 | 0.95 | 1.09 | 7.90E-01 | 3.67E-03 | 9.18E-01 | 1.00E+00 |
| 8026579 | NM_024074       | TMEM38A      | transmembrane protein 38A                                                      | L359V only | 1.18 | 1.48 | 1.16 | 1.17 | 2.48E-01 | 7.30E-03 | 7.97E-01 | 7.22E-01 |
| 8007228 | NM_001130020    | ATP6VOA1     | ATPase, H+ transporting, lysosomal V0 subunit a1                               | L359V only | 1.21 | 1.48 | 1.14 | 1.13 | 1.88E-01 | 8.55E-03 | 8.14E-01 | 1.00E+00 |
| 8140971 | NM_152703       | SAMD9L       | sterile alpha motif domain containing 9-like                                   | L359V only | 1.31 | 1.47 | 0.94 | 1.05 | 1.10E-01 | 1.91E-02 | 9.27E-01 | 1.00E+00 |
| 8012376 | NM_014232       | VAMP2        | vesicle-associated membrane protein 2 (synaptobrevin 2)                        | L359V only | 1.22 | 1.47 | 1.16 | 1.08 | 2.61E-01 | 2.01E-02 | 8.25E-01 | 1.00E+00 |
| 8013159 | NM_001082968    | TOM1L2       | target of myb1-like 2 (chicken)                                                | L359V only | 1.24 | 1.47 | 1.01 | 1.10 | 7.78E-02 | 3.68E-03 | 9.94E-01 | 1.00E+00 |
| 8155062 | NM_006285       | TESK1        | testis-specific kinase 1                                                       | L359V only | 1.19 | 1.47 | 1.00 | 1.06 | 1.97E-01 | 5.20E-03 | 9.99E-01 | 1.00E+00 |
| 8086600 | NM_001295       | CCR1         | chemokine (C-C motif) receptor 1                                               | L359V only | 0.87 | 1.47 | 0.71 | 0.97 | 3.10E-01 | 5.62E-03 | 8.45E-02 | 1.00E+00 |
| 7954985 | NM_032256       | TMEM117      | transmembrane protein 117                                                      | L359V only | 1.03 | 1.47 | 0.64 | 0.98 | 9.40E-01 | 4.69E-02 | 2.00E-01 | 1.00E+00 |
| 7964631 | NM_178539       | FAM19A2      | family with sequence similarity 19 (chemokine (C-C motif)-like), member A2     | L359V only | 1.41 | 1.47 | 1.22 | 1.25 | 8.69E-02 | 4.22E-02 | 8.06E-01 | 7.47E-01 |
| 8115464 | NM_032782       | HAVCR2       | hepatitis A virus cellular receptor 2                                          | L359V only | 0.97 | 1.47 | 1.07 | 1.09 | 8.87E-01 | 1.18E-02 | 9.02E-01 | 1.00E+00 |
| 7953564 | NM_138425       | C12orf57     | chromosome 12 open reading frame 57                                            | L359V only | 1.34 | 1.47 | 1.05 | 1.18 | 1.66E-01 | 4.77E-02 | 9.54E-01 | 1.00E+00 |
| 8022996 | NM_020964       | KIAA1632     | KIAA1632                                                                       | L359V only | 1.28 | 1.47 | 1.11 | 1.16 | 5.27E-02 | 4.42E-03 | 8.34E-01 | 7.02E-01 |

|         |              |              |                                                                              |            |      |      |      |      |          |          |          |          |
|---------|--------------|--------------|------------------------------------------------------------------------------|------------|------|------|------|------|----------|----------|----------|----------|
| 8169995 | AK295485     | FAM122C      | family with sequence similarity 122C                                         | L359V only | 1.16 | 1.47 | 0.88 | 1.08 | 5.20E-01 | 3.77E-02 | 8.69E-01 | 1.00E+00 |
| 8158380 | NM_013355    | PKN3         | protein kinase N3                                                            | L359V only | 1.18 | 1.47 | 1.17 | 1.15 | 3.98E-01 | 2.88E-02 | 8.25E-01 | 1.00E+00 |
| 8125007 | NM_025262    | LY6G5C       | lymphocyte antigen 6 complex, locus G5C                                      | L359V only | 1.21 | 1.47 | 0.97 | 1.10 | 3.51E-01 | 3.85E-02 | 9.74E-01 | 1.00E+00 |
| 8124551 | NR_002936    | LOC222699    | transducer of ERBB2, 2 pseudogene                                            | L359V only | 1.22 | 1.46 | 1.07 | 1.11 | 2.20E-01 | 1.43E-02 | 9.15E-01 | 1.00E+00 |
| 7951437 | NM_000855    | GUCY1A2      | guanylate cyclase 1, soluble, alpha 2                                        | L359V only | 0.82 | 1.46 | 0.81 | 0.95 | 8.63E-02 | 3.42E-03 | 3.50E-01 | 1.00E+00 |
| 8133770 | NM_020879    | CCDC146      | coiled-coil domain containing 146                                            | L359V only | 1.19 | 1.46 | 0.85 | 1.11 | 4.48E-01 | 4.69E-02 | 8.36E-01 | 1.00E+00 |
| 8034151 | NM_020812    | DOCK6        | dedicator of cytokinesis 6                                                   | L359V only | 1.24 | 1.46 | 1.28 | 1.21 | 1.28E-01 | 8.08E-03 | 3.90E-01 | 5.47E-01 |
| 8014916 | NM_139280    | ORMDL3       | ORM1-like 3 ( <i>S. cerevisiae</i> )                                         | L359V only | 1.17 | 1.46 | 1.11 | 1.13 | 3.72E-01 | 2.01E-02 | 8.74E-01 | 1.00E+00 |
| 7904812 | NM_006099    | PIAS3        | protein inhibitor of activated STAT, 3                                       | L359V only | 1.26 | 1.46 | 1.05 | 1.06 | 1.32E-01 | 1.41E-02 | 9.44E-01 | 1.00E+00 |
| 8065612 | NM_080616    | C2orf112     | chromosome 20 open reading frame 112                                         | L359V only | 1.17 | 1.45 | 0.92 | 1.03 | 4.20E-01 | 3.12E-02 | 8.98E-01 | 1.00E+00 |
| 8098121 | NM_014247    | RAPGEF2      | Rap guanine nucleotide exchange factor (GEF) 2                               | L359V only | 1.07 | 1.45 | 0.80 | 0.99 | 7.24E-01 | 1.09E-02 | 5.05E-01 | 1.00E+00 |
| 7977646 | NM_016423    | ZNF219       | zinc finger protein 219                                                      | L359V only | 1.18 | 1.45 | 1.02 | 1.14 | 2.66E-01 | 9.98E-03 | 9.75E-01 | 9.78E-01 |
| 8015511 | NM_024119    | DHX58        | DEXH (Asp-Glu-X-His) box polypeptide 58                                      | L359V only | 1.26 | 1.45 | 1.10 | 1.15 | 1.49E-01 | 1.65E-02 | 8.76E-01 | 9.88E-01 |
| 7955589 | NM_002135    | NR4A1        | nuclear receptor subfamily 4, group A, member 1                              | L359V only | 1.21 | 1.45 | 1.21 | 1.16 | 1.75E-01 | 8.08E-03 | 5.84E-01 | 7.48E-01 |
| 8029136 | NM_001783    | CD79A        | CD79a molecule, immunoglobulin-associated alpha                              | L359V only | 1.19 | 1.45 | 1.08 | 1.06 | 1.40E-01 | 4.07E-03 | 8.64E-01 | 1.00E+00 |
| 8019912 | NM_032048    | EMILIN2      | elastin microfibril interfacier 2                                            | L359V only | 0.97 | 1.45 | 1.09 | 1.12 | 9.23E-01 | 2.39E-02 | 8.97E-01 | 1.00E+00 |
| 7929719 | NM_014472    | C10orf28     | chromosome 10 open reading frame 28                                          | L359V only | 1.24 | 1.45 | 0.99 | 1.15 | 2.23E-01 | 2.47E-02 | 9.91E-01 | 1.00E+00 |
| 8178554 | NM_025262    | LY6G5C       | lymphocyte antigen 6 complex, locus G5C                                      | L359V only | 1.23 | 1.45 | 0.95 | 1.09 | 3.01E-01 | 4.00E-02 | 9.51E-01 | 1.00E+00 |
| 8151223 | NM_030958    | SLCO5A1      | solute carrier organic anion transporter family, member 5A1                  | L359V only | 1.04 | 1.45 | 1.11 | 1.15 | 8.54E-01 | 7.86E-03 | 8.41E-01 | 8.36E-01 |
| 8108579 | NM_018502    | TMCO6        | transmembrane and coiled-coil domains 6                                      | L359V only | 1.14 | 1.45 | 1.12 | 1.16 | 2.13E-01 | 2.28E-03 | 7.94E-01 | 4.98E-01 |
| 8043835 | BC021264     | C2orf15      | chromosome 2 open reading frame 15                                           | L359V only | 1.10 | 1.45 | 1.24 | 1.17 | 6.88E-01 | 4.34E-02 | 7.65E-01 | 1.00E+00 |
| 8171708 | NM_198279    | CXorf23      | chromosome X open reading frame 23                                           | L359V only | 1.29 | 1.44 | 1.11 | 1.22 | 1.97E-01 | 4.48E-02 | 8.86E-01 | 8.45E-01 |
| 8156476 | NM_005392    | PHF2         | PHD finger protein 2                                                         | L359V only | 1.24 | 1.44 | 1.04 | 1.08 | 1.01E-01 | 6.94E-03 | 9.50E-01 | 1.00E+00 |
| 8098103 | NM_020840    | FNIP2        | folliculin interacting protein 2                                             | L359V only | 1.13 | 1.44 | 0.91 | 1.06 | 4.15E-01 | 7.86E-03 | 8.56E-01 | 1.00E+00 |
| 7904050 | NM_020963    | MOV10        | Mov10, Moloney leukemia virus 10, homolog (mouse)                            | L359V only | 1.27 | 1.44 | 1.00 | 1.08 | 1.46E-01 | 2.00E-02 | 9.99E-01 | 1.00E+00 |
| 8006161 | NM_015594    | TBC1D29      | TBC1 domain family, member 29                                                | L359V only | 1.07 | 1.44 | 1.01 | 1.07 | 7.48E-01 | 1.82E-02 | 9.90E-01 | 1.00E+00 |
| 7903334 | NM_003672    | CDC14A       | CDC14 cell division cycle 14 homolog A ( <i>S. cerevisiae</i> )              | L359V only | 1.10 | 1.44 | 0.97 | 1.08 | 6.26E-01 | 2.00E-02 | 9.73E-01 | 1.00E+00 |
| 7948493 | NM_016582    | SLC15A3      | solute carrier family 15, member 3                                           | L359V only | 1.35 | 1.44 | 1.42 | 1.23 | 9.71E-02 | 3.37E-02 | 2.79E-01 | 7.38E-01 |
| 7958960 | NM_017901    | TPCN1        | two pore segment channel 1                                                   | L359V only | 1.25 | 1.44 | 1.16 | 1.12 | 7.34E-02 | 5.26E-03 | 7.28E-01 | 9.05E-01 |
| 7939738 | NM_000107    | DDB2         | damage-specific DNA binding protein 2, 48kDa                                 | L359V only | 1.15 | 1.44 | 1.01 | 1.11 | 5.11E-01 | 3.41E-02 | 9.97E-01 | 1.00E+00 |
| 8173208 | NM_001012968 | SPIN4        | spindlin family, member 4                                                    | L359V only | 1.08 | 1.44 | 1.11 | 1.16 | 6.17E-01 | 5.91E-03 | 8.38E-01 | 6.73E-01 |
| 7969477 | ---          | ---          | ---                                                                          | L359V only | 1.16 | 1.44 | 1.40 | 1.20 | 4.97E-01 | 4.88E-02 | 4.09E-01 | 9.27E-01 |
| 8134117 | NM_003505    | FZD1         | frizzled homolog 1 ( <i>Drosophila</i> )                                     | L359V only | 1.30 | 1.43 | 1.08 | 1.16 | 1.22E-01 | 2.79E-02 | 9.06E-01 | 9.78E-01 |
| 8128894 | NM_002912    | REV3L        | REV3-like, catalytic subunit of DNA polymerase zeta (yeast)                  | L359V only | 1.17 | 1.43 | 1.04 | 1.15 | 1.79E-01 | 3.67E-03 | 9.41E-01 | 6.27E-01 |
| 7899043 | NM_020451    | SEPN1        | selenoprotein N, 1                                                           | L359V only | 1.17 | 1.43 | 1.06 | 1.04 | 2.14E-01 | 6.93E-03 | 9.09E-01 | 1.00E+00 |
| 8079462 | NM_015175    | NBEAL2       | neurobeachin-like 2                                                          | L359V only | 1.15 | 1.43 | 1.03 | 1.07 | 2.25E-01 | 4.26E-03 | 9.47E-01 | 1.00E+00 |
| 7957806 | NM_017988    | SCYL2        | SCY1-like 2 ( <i>S. cerevisiae</i> )                                         | L359V only | 1.06 | 1.43 | 0.98 | 1.09 | 7.00E-01 | 4.99E-03 | 9.71E-01 | 1.00E+00 |
| 7912496 | NM_005957    | MTHFR        | 5,10-methylenetetrahydrofolate reductase (NADPH)                             | L359V only | 0.99 | 1.43 | 0.95 | 1.00 | 9.31E-01 | 2.95E-03 | 8.98E-01 | 1.00E+00 |
| 7927091 | AK128746     | LOC399744    | hypothetical LOC399744                                                       | L359V only | 1.00 | 1.43 | 1.15 | 1.07 | 9.91E-01 | 1.44E-02 | 8.14E-01 | 1.00E+00 |
| 7930106 | NM_024789    | TMEM180      | transmembrane protein 180                                                    | L359V only | 1.20 | 1.43 | 1.03 | 1.06 | 1.45E-01 | 6.65E-03 | 9.55E-01 | 1.00E+00 |
| 8173340 | NM_145119    | PJA1         | praja ring finger 1                                                          | L359V only | 1.33 | 1.42 | 1.15 | 1.20 | 9.40E-02 | 3.10E-02 | 8.35E-01 | 8.01E-01 |
| 7902977 | NM_015237    | KIAA1107     | KIAA1107                                                                     | L359V only | 1.41 | 1.42 | 1.10 | 1.21 | 7.29E-02 | 4.82E-02 | 8.98E-01 | 8.69E-01 |
| 7905974 | NM_020897    | HCN3         | hyperpolarization activated cyclic nucleotide-gated potassium channel 3      | L359V only | 1.17 | 1.42 | 1.07 | 1.07 | 3.26E-01 | 1.72E-02 | 9.01E-01 | 1.00E+00 |
| 7946742 | NM_024514    | CYP2R1       | cytochrome P450, family 2, subfamily R, polypeptide 1                        | L359V only | 1.05 | 1.42 | 1.06 | 1.17 | 8.19E-01 | 2.46E-02 | 9.31E-01 | 8.94E-01 |
| 7912166 | NM_012102    | RERE         | arginine-glutamic acid dipeptide (RE) repeats                                | L359V only | 1.24 | 1.42 | 1.05 | 1.10 | 8.03E-02 | 6.23E-03 | 9.27E-01 | 1.00E+00 |
| 8034130 | NM_015493    | KANK2        | KN motif and ankyrin repeat domains 2                                        | L359V only | 1.23 | 1.42 | 1.20 | 1.15 | 2.12E-01 | 2.51E-02 | 7.66E-01 | 1.00E+00 |
| 8028791 | NM_012268    | PLD3         | phospholipase D family, member 3                                             | L359V only | 1.12 | 1.42 | 0.98 | 1.06 | 4.35E-01 | 7.43E-03 | 9.67E-01 | 1.00E+00 |
| 7920757 | BC080538     | C1orf104     | chromosome 1 open reading frame 104                                          | L359V only | 1.25 | 1.42 | 1.03 | 1.11 | 7.75E-02 | 7.29E-03 | 9.64E-01 | 1.00E+00 |
| 7956842 | NM_014319    | LEMD3        | LEM domain containing 3                                                      | L359V only | 1.11 | 1.42 | 1.02 | 1.11 | 5.07E-01 | 9.26E-03 | 9.75E-01 | 1.00E+00 |
| 8042925 | NM_004263    | SEMA4F       | sema domain, immunoglobulin domain (Ig), transmembrane domain (TM) and short | L359V only | 1.22 | 1.42 | 1.17 | 1.18 | 1.19E-01 | 7.86E-03 | 7.22E-01 | 6.19E-01 |
| 8003263 | NM_015144    | ZCCHC14      | zinc finger, CCHC domain containing 14                                       | L359V only | 1.25 | 1.42 | 1.03 | 1.09 | 1.21E-01 | 1.36E-02 | 9.59E-01 | 1.00E+00 |
| 8073129 | NM_002409    | MGAT3        | mannosyl (beta-1,4)-glycoprotein beta-1,4-N-acetylglucosaminyltransferase    | L359V only | 0.99 | 1.42 | 1.03 | 1.08 | 9.83E-01 | 2.21E-02 | 9.65E-01 | 1.00E+00 |
| 8146285 | NM_152419    | HGSNAT       | heparan-alpha-glucosaminide N-acetyltransferase                              | L359V only | 1.28 | 1.42 | 1.05 | 1.14 | 1.72E-01 | 3.90E-02 | 9.52E-01 | 1.00E+00 |
| 7918593 | NM_175744    | RHOC         | ras homolog gene family, member C                                            | L359V only | 1.27 | 1.42 | 1.14 | 1.13 | 1.47E-01 | 2.65E-02 | 8.36E-01 | 1.00E+00 |
| 8050844 | AF052121     | LOC100131510 | hypothetical LOC100131510                                                    | L359V only | 1.10 | 1.42 | 0.87 | 1.06 | 6.40E-01 | 2.55E-02 | 8.36E-01 | 1.00E+00 |
| 7902660 | NM_145172    | WDR63        | WD repeat domain 63                                                          | L359V only | 1.00 | 1.42 | 0.97 | 1.07 | 9.89E-01 | 4.98E-02 | 9.75E-01 | 1.00E+00 |
| 7956242 | NM_144576    | COQ10A       | coenzyme Q10 homolog A ( <i>S. cerevisiae</i> )                              | L359V only | 1.24 | 1.42 | 1.10 | 1.16 | 1.31E-01 | 1.40E-02 | 8.68E-01 | 8.36E-01 |
| 8114526 | NM_152686    | DNAJC18      | DnaJ (Hsp40) homolog, subfamily C, member 18                                 | L359V only | 1.27 | 1.42 | 1.18 | 1.22 | 8.00E-02 | 1.11E-02 | 7.33E-01 | 4.76E-01 |
| 7956211 | NM_021019    | MYL6         | myosin, light chain 6, alkali, smooth muscle and non-muscle                  | L359V only | 1.27 | 1.42 | 1.04 | 1.07 | 1.42E-01 | 2.67E-02 | 9.52E-01 | 1.00E+00 |
| 8179238 | NM_000247    | MICA         | MHC class I polypeptide-related sequence A                                   | L359V only | 1.37 | 1.41 | 1.13 | 1.19 | 5.87E-02 | 2.83E-02 | 8.51E-01 | 8.08E-01 |
| 7945344 | AK294679     | tcag7.907    | hypothetical LOC402483                                                       | L359V only | 1.12 | 1.41 | 1.19 | 1.14 | 5.81E-01 | 3.84E-02 | 8.01E-01 | 1.00E+00 |
| 8106354 | NM_006633    | IQGAP2       | IQ motif containing GTPase activating protein 2                              | L359V only | 1.26 | 1.41 | 1.07 | 1.15 | 5.91E-02 | 6.96E-03 | 8.85E-01 | 7.09E-01 |
| 8121095 | NM_014942    | ANKRD6       | ankyrin repeat domain 6                                                      | L359V only | 1.11 | 1.41 | 1.03 | 1.10 | 5.76E-01 | 2.17E-02 | 9.73E-01 | 1.00E+00 |
| 8172531 | NM_007213    | PRAF2        | PRA1 domain family, member 2                                                 | L359V only | 1.26 | 1.41 | 1.23 | 1.12 | 1.17E-01 | 1.64E-02 | 5.69E-01 | 1.00E+00 |
| 7924977 | NM_024554    | PGBD5        | piggyBac transposable element derived 5                                      | L359V only | 0.85 | 1.41 | 0.85 | 0.97 | 2.25E-01 | 1.06E-02 | 7.38E-01 | 1.00E+00 |

|         |              |           |                                                                                          |            |      |      |      |      |          |          |          |          |
|---------|--------------|-----------|------------------------------------------------------------------------------------------|------------|------|------|------|------|----------|----------|----------|----------|
| 8019347 | ---          |           |                                                                                          | L359V only | 1.02 | 1.41 | 1.09 | 1.11 | 9.55E-01 | 4.98E-02 | 9.01E-01 | 1.00E+00 |
| 7947815 | NM_001610    | ACP2      | acid phosphatase 2, lysosomal                                                            | L359V only | 1.08 | 1.41 | 0.99 | 1.05 | 6.68E-01 | 1.62E-02 | 9.93E-01 | 1.00E+00 |
| 7987454 | NM_001003940 | BMF       | Bcl2 modifying factor                                                                    | L359V only | 1.05 | 1.41 | 0.93 | 1.10 | 8.33E-01 | 2.85E-02 | 9.06E-01 | 1.00E+00 |
| 7961059 | NM_002258    | KLRB1     | killer cell lectin-like receptor subfamily B, member 1                                   | L359V only | 1.10 | 1.41 | 1.19 | 1.19 | 6.47E-01 | 4.09E-02 | 8.03E-01 | 8.90E-01 |
| 8000910 | NM_145271    | ZNF688    | zinc finger protein 688                                                                  | L359V only | 1.19 | 1.41 | 1.14 | 1.15 | 1.79E-01 | 9.58E-03 | 8.01E-01 | 7.75E-01 |
| 7941537 | NM_018026    | PACS1     | phosphofurin acidic cluster sorting protein 1                                            | L359V only | 1.17 | 1.41 | 0.90 | 1.01 | 3.25E-01 | 1.99E-02 | 8.53E-01 | 1.00E+00 |
| 7960744 | NM_001733    | C1R       | complement component 1, r subcomponent                                                   | L359V only | 1.22 | 1.40 | 1.02 | 1.12 | 1.84E-01 | 1.75E-02 | 9.84E-01 | 1.00E+00 |
| 7904955 | ---          |           |                                                                                          | L359V only | 1.24 | 1.40 | 1.04 | 1.15 | 1.30E-01 | 1.65E-02 | 9.43E-01 | 8.90E-01 |
| 8047565 | NM_173511    | FAM117B   | family with sequence similarity 117, member B                                            | L359V only | 1.13 | 1.40 | 1.00 | 1.01 | 4.31E-01 | 1.79E-02 | 9.99E-01 | 1.00E+00 |
| 8010454 | NM_020914    | RNF213    | ring finger protein 213                                                                  | L359V only | 1.24 | 1.40 | 0.98 | 1.04 | 8.00E-02 | 7.15E-03 | 9.81E-01 | 1.00E+00 |
| 8125687 | NM_004761    | RGL2      | ral guanine nucleotide dissociation stimulator-like 2                                    | L359V only | 1.33 | 1.40 | 1.09 | 1.13 | 5.88E-02 | 2.09E-02 | 8.80E-01 | 1.00E+00 |
| 7966488 | NM_001109662 | C12orf51  | chromosome 12 open reading frame 51                                                      | L359V only | 1.16 | 1.40 | 0.98 | 1.04 | 2.85E-01 | 1.25E-02 | 9.76E-01 | 1.00E+00 |
| 7945462 | NM_004031    | IRF7      | interferon regulatory factor 7                                                           | L359V only | 1.18 | 1.40 | 1.05 | 1.11 | 2.07E-01 | 1.10E-02 | 9.22E-01 | 1.00E+00 |
| 8051928 | NM_006036    | PREPL     | prolyl endopeptidase-like                                                                | L359V only | 1.09 | 1.40 | 1.08 | 1.17 | 5.35E-01 | 7.80E-03 | 8.66E-01 | 6.07E-01 |
| 7995825 | NM_005949    | MT1F      | metallothionein 1F                                                                       | L359V only | 1.18 | 1.40 | 1.11 | 1.09 | 2.67E-01 | 1.82E-02 | 8.46E-01 | 1.00E+00 |
| 7915468 | NM_199342    | CCDC23    | coiled-coil domain containing 23                                                         | L359V only | 1.08 | 1.40 | 0.97 | 1.09 | 7.56E-01 | 4.41E-02 | 9.68E-01 | 1.00E+00 |
| 8009844 | NM_001031803 | LLGL2     | lethal giant larvae homolog 2 (Drosophila)                                               | L359V only | 1.17 | 1.40 | 0.96 | 1.08 | 4.31E-01 | 4.71E-02 | 9.59E-01 | 1.00E+00 |
| 8025672 | NM_020428    | SLC44A2   | solute carrier family 44, member 2                                                       | L359V only | 1.39 | 1.40 | 1.21 | 1.15 | 5.32E-02 | 3.62E-02 | 7.50E-01 | 1.00E+00 |
| 8131614 | NM_001621    | AHR       | aryl hydrocarbon receptor                                                                | L359V only | 1.16 | 1.40 | 0.75 | 0.99 | 4.23E-01 | 3.67E-02 | 3.90E-01 | 1.00E+00 |
| 7962375 | NM_153026    | PRICKLE1  | prickle homolog 1 (Drosophila)                                                           | L359V only | 0.87 | 1.39 | 0.92 | 1.02 | 4.43E-01 | 3.72E-02 | 8.94E-01 | 1.00E+00 |
| 7996954 | NM_138714    | NFAT5     | nuclear factor of activated T-cells 5, tonicity-responsive                               | L359V only | 1.26 | 1.39 | 0.97 | 1.07 | 5.89E-02 | 7.63E-03 | 9.59E-01 | 1.00E+00 |
| 8178955 | NM_004761    | RGL2      | ral guanine nucleotide dissociation stimulator-like 2                                    | L359V only | 1.30 | 1.39 | 1.09 | 1.12 | 1.02E-01 | 2.91E-02 | 8.90E-01 | 1.00E+00 |
| 8180144 | NM_004761    | RGL2      | ral guanine nucleotide dissociation stimulator-like 2                                    | L359V only | 1.30 | 1.39 | 1.09 | 1.12 | 1.02E-01 | 2.91E-02 | 8.90E-01 | 1.00E+00 |
| 8115623 | NM_025153    | ATP10B    | ATPase, class V, type 10B                                                                | L359V only | 1.07 | 1.39 | 1.05 | 1.08 | 7.27E-01 | 2.60E-02 | 9.36E-01 | 1.00E+00 |
| 8034762 | NM_002730    | PRKACA    | protein kinase, cAMP-dependent, catalytic, alpha                                         | L359V only | 1.31 | 1.39 | 1.05 | 1.10 | 7.15E-02 | 2.30E-02 | 9.41E-01 | 1.00E+00 |
| 8004385 | NM_020795    | NLGN2     | neuroligin 2                                                                             | L359V only | 1.18 | 1.39 | 1.22 | 1.18 | 2.52E-01 | 1.64E-02 | 5.66E-01 | 6.73E-01 |
| 7939723 | NM_001003676 | C11orf49  | chromosome 11 open reading frame 49                                                      | L359V only | 1.04 | 1.39 | 0.83 | 1.02 | 8.13E-01 | 4.13E-03 | 4.12E-01 | 1.00E+00 |
| 7907079 | NM_052862    | RCSD1     | RCSD domain containing 1                                                                 | L359V only | 1.30 | 1.39 | 1.28 | 1.26 | 5.27E-02 | 1.36E-02 | 3.29E-01 | 3.17E-01 |
| 7969341 | NM_030794    | TDRD3     | tudor domain containing 3                                                                | L359V only | 1.24 | 1.39 | 1.06 | 1.15 | 1.34E-01 | 1.75E-02 | 9.13E-01 | 8.78E-01 |
| 7955535 | NM_004302    | ACVR1B    | activin A receptor, type 1B                                                              | L359V only | 1.23 | 1.39 | 1.13 | 1.11 | 1.42E-01 | 1.76E-02 | 8.34E-01 | 1.00E+00 |
| 8113724 | ---          |           |                                                                                          | L359V only | 1.11 | 1.39 | 1.17 | 1.13 | 6.12E-01 | 4.73E-02 | 8.16E-01 | 1.00E+00 |
| 7944463 | NM_024618    | NLRX1     | NLR family member X1                                                                     | L359V only | 1.16 | 1.38 | 1.08 | 1.13 | 2.90E-01 | 1.55E-02 | 8.81E-01 | 9.88E-01 |
| 8117389 | NM_003523    | HIST1H2BE | histone cluster 1, H2be                                                                  | L359V only | 1.22 | 1.38 | 1.16 | 1.18 | 1.84E-01 | 2.47E-02 | 8.01E-01 | 7.47E-01 |
| 8030339 | NM_001459    | FLT3LG    | fms-related tyrosine kinase 3 ligand                                                     | L359V only | 1.15 | 1.38 | 1.04 | 1.07 | 2.15E-01 | 5.03E-03 | 9.31E-01 | 1.00E+00 |
| 7913001 | NM_020765    | UBR4      | ubiquitin protein ligase E3 component n-recognin 4                                       | L359V only | 1.24 | 1.38 | 0.97 | 1.09 | 1.55E-01 | 2.69E-02 | 9.71E-01 | 1.00E+00 |
| 7984079 | NM_000366    | TPM1      | tropomyosin 1 (alpha)                                                                    | L359V only | 1.27 | 1.38 | 1.06 | 1.14 | 7.02E-02 | 1.29E-02 | 9.07E-01 | 8.90E-01 |
| 7909529 | NM_001136223 | RCOR3     | REST corepressor 3                                                                       | L359V only | 1.19 | 1.38 | 0.96 | 1.07 | 2.56E-01 | 2.69E-02 | 9.51E-01 | 1.00E+00 |
| 8049689 | NM_018226    | RNPEPL1   | arginyl aminopeptidase (aminopeptidase B)-like 1                                         | L359V only | 1.26 | 1.38 | 1.21 | 1.15 | 5.04E-02 | 7.60E-03 | 4.49E-01 | 6.55E-01 |
| 8131067 | NM_138445    | GPR146    | G protein-coupled receptor 146                                                           | L359V only | 0.89 | 1.38 | 0.89 | 1.03 | 5.52E-01 | 4.85E-02 | 8.65E-01 | 1.00E+00 |
| 7974697 | NM_014992    | DAAM1     | dishevelled associated activator of morphogenesis 1                                      | L359V only | 1.22 | 1.38 | 0.92 | 1.07 | 2.24E-01 | 3.28E-02 | 8.88E-01 | 1.00E+00 |
| 8149986 | NM_018660    | ZNF395    | zinc finger protein 395                                                                  | L359V only | 1.08 | 1.38 | 1.00 | 1.06 | 6.59E-01 | 2.14E-02 | 9.99E-01 | 1.00E+00 |
| 7986049 | NM_022769    | CRTC3     | CREB regulated transcription coactivator 3                                               | L359V only | 1.30 | 1.38 | 1.07 | 1.02 | 1.09E-01 | 4.01E-02 | 9.22E-01 | 1.00E+00 |
| 7911211 | ---          |           |                                                                                          | L359V only | 0.95 | 1.38 | 1.03 | 1.03 | 8.02E-01 | 2.50E-02 | 9.64E-01 | 1.00E+00 |
| 8123936 | NM_006403    | NEDD9     | neural precursor cell expressed, developmentally down-regulated 9                        | L359V only | 1.27 | 1.38 | 1.19 | 1.16 | 7.14E-02 | 1.42E-02 | 6.60E-01 | 7.38E-01 |
| 8170891 | NM_001493    | GDI1      | GDP dissociation inhibitor 1                                                             | L359V only | 1.29 | 1.38 | 1.06 | 1.08 | 6.99E-02 | 2.03E-02 | 9.21E-01 | 1.00E+00 |
| 8130032 | NM_032145    | FBXO30    | F-box protein 30                                                                         | L359V only | 1.32 | 1.38 | 1.01 | 1.12 | 7.33E-02 | 3.08E-02 | 9.96E-01 | 1.00E+00 |
| 8073826 | NM_005036    | PPARA     | peroxisome proliferator-activated receptor alpha                                         | L359V only | 1.25 | 1.38 | 0.99 | 1.06 | 1.10E-01 | 1.72E-02 | 9.86E-01 | 1.00E+00 |
| 7947110 | NM_024680    | E2F8      | E2F transcription factor 8                                                               | L359V only | 1.20 | 1.38 | 1.03 | 1.07 | 1.31E-01 | 1.01E-02 | 9.55E-01 | 1.00E+00 |
| 7955045 | BC008360     | FAM113B   | family with sequence similarity 113, member B                                            | L359V only | 1.04 | 1.38 | 0.68 | 0.95 | 8.53E-01 | 2.95E-02 | 1.06E-01 | 1.00E+00 |
| 8112107 | NM_003711    | PPAP2A    | phosphatidic acid phosphatase type 2A                                                    | L359V only | 1.34 | 1.38 | 1.22 | 1.09 | 6.36E-02 | 3.41E-02 | 7.02E-01 | 1.00E+00 |
| 8033233 | NM_006087    | TUBB4     | tubulin, beta 4                                                                          | L359V only | 1.23 | 1.37 | 1.07 | 1.15 | 1.37E-01 | 2.03E-02 | 8.94E-01 | 8.59E-01 |
| 7958620 | NM_014055    | IFT81     | intraflagellar transport 81 homolog (Chlamydomonas)                                      | L359V only | 1.19 | 1.37 | 1.13 | 1.18 | 2.97E-01 | 3.75E-02 | 8.38E-01 | 8.60E-01 |
| 8141728 | NM_022777    | RABL5     | RAB, member RAS oncogene family-like 5                                                   | L359V only | 1.14 | 1.37 | 1.02 | 1.12 | 3.36E-01 | 1.35E-02 | 9.74E-01 | 9.88E-01 |
| 7967002 | NM_001080855 | PXN       | paxillin                                                                                 | L359V only | 1.10 | 1.37 | 1.08 | 1.10 | 6.05E-01 | 2.44E-02 | 8.94E-01 | 1.00E+00 |
| 7930074 | NM_002502    | NFKB2     | nuclear factor of kappa light polypeptide gene enhancer in B-cells 2 (p49)               | L359V only | 1.35 | 1.37 | 1.20 | 1.16 | 5.63E-02 | 3.15E-02 | 7.33E-01 | 8.97E-01 |
| 8155121 | NM_003995    | NPR2      | natriuretic peptide receptor B guanylate cyclase B (atrionatriuretic peptide receptor B) | L359V only | 1.07 | 1.37 | 1.03 | 1.08 | 6.53E-01 | 8.19E-03 | 9.43E-01 | 1.00E+00 |
| 8155110 | NM_001080496 | RGP1      | RGP1 retrograde golgi transport homolog (S. cerevisiae)                                  | L359V only | 1.21 | 1.37 | 0.99 | 1.04 | 1.12E-01 | 9.58E-03 | 9.94E-01 | 1.00E+00 |
| 7964579 | NM_005730    | CTDSP2    | CTD (carboxy-terminal domain, RNA polymerase II, polypeptide A) small phosphatase        | L359V only | 1.24 | 1.37 | 1.01 | 1.14 | 1.04E-01 | 1.64E-02 | 9.84E-01 | 8.90E-01 |
| 8024120 | NM_019112    | ABCA7     | ATP-binding cassette, sub-family A (ABC1), member 7                                      | L359V only | 1.15 | 1.37 | 1.01 | 1.04 | 3.56E-01 | 2.41E-02 | 9.93E-01 | 1.00E+00 |
| 8150195 | ---          |           |                                                                                          | L359V only | 1.12 | 1.37 | 1.25 | 1.17 | 5.06E-01 | 2.38E-02 | 4.96E-01 | 8.06E-01 |
| 8015133 | NM_015515    | KRT23     | keratin 23 (histone deacetylase inducible)                                               | L359V only | 1.09 | 1.37 | 1.16 | 1.16 | 6.16E-01 | 2.69E-02 | 8.01E-01 | 8.90E-01 |
| 8003158 | NM_020947    | KIAA1609  | KIAA1609                                                                                 | L359V only | 1.34 | 1.37 | 1.17 | 1.21 | 6.14E-02 | 3.39E-02 | 8.02E-01 | 6.73E-01 |
| 7915882 | NM_014774    | KIAA0494  | KIAA0494                                                                                 | L359V only | 1.28 | 1.37 | 0.99 | 1.09 | 1.13E-01 | 3.41E-02 | 9.94E-01 | 1.00E+00 |
| 7960642 | NM_032489    | ACRBP     | acrosin binding protein                                                                  | L359V only | 1.24 | 1.37 | 1.18 | 1.17 | 2.11E-01 | 4.95E-02 | 8.13E-01 | 9.49E-01 |
| 8150276 | NM_001102559 | PPAPDC1B  | phosphatidic acid phosphatase type 2 domain containing 1B                                | L359V only | 1.23 | 1.37 | 1.03 | 1.07 | 2.08E-01 | 3.76E-02 | 9.73E-01 | 1.00E+00 |

|         |              |              |                                                               |            |      |      |      |      |          |          |          |          |
|---------|--------------|--------------|---------------------------------------------------------------|------------|------|------|------|------|----------|----------|----------|----------|
| 7960947 | NM_000014    | A2M          | alpha-2-macroglobulin                                         | L359V only | 1.02 | 1.37 | 1.04 | 1.11 | 9.15E-01 | 1.54E-02 | 9.50E-01 | 1.00E+00 |
| 7997498 | ---          |              |                                                               | L359V only | 1.08 | 1.37 | 1.19 | 1.15 | 7.03E-01 | 3.93E-02 | 7.79E-01 | 1.00E+00 |
| 7921179 | NM_198236    | ARHGEF11     | Rho guanine nucleotide exchange factor (GEF) 11               | L359V only | 1.26 | 1.37 | 1.05 | 1.05 | 1.03E-01 | 2.21E-02 | 9.31E-01 | 1.00E+00 |
| 8012423 | NM_025099    | C17orf68     | chromosome 17 open reading frame 68                           | L359V only | 1.09 | 1.37 | 0.98 | 1.03 | 4.84E-01 | 7.89E-03 | 9.78E-01 | 1.00E+00 |
| 8073214 | NM_001024843 | TNRC6B       | trinucleotide repeat containing 6B                            | L359V only | 1.22 | 1.37 | 1.03 | 1.10 | 8.73E-02 | 8.79E-03 | 9.57E-01 | 1.00E+00 |
| 8099438 | ---          |              |                                                               | L359V only | 0.91 | 1.37 | 0.94 | 1.01 | 5.97E-01 | 2.55E-02 | 9.22E-01 | 1.00E+00 |
| 8128716 | NM_006016    | CD164        | CD164 molecule, sialomucin                                    | L359V only | 1.19 | 1.37 | 1.20 | 1.20 | 1.18E-01 | 6.74E-03 | 4.31E-01 | 3.37E-01 |
| 8064557 | AK293638     | FAM113A      | family with sequence similarity 113, member A                 | L359V only | 1.11 | 1.37 | 1.04 | 1.09 | 5.52E-01 | 2.96E-02 | 9.47E-01 | 1.00E+00 |
| 8075365 | NM_001017981 | RNF215       | ring finger protein 215                                       | L359V only | 1.22 | 1.37 | 1.11 | 1.15 | 2.11E-01 | 3.74E-02 | 8.64E-01 | 9.69E-01 |
| 8016159 | NM_024819    | DCAKD        | dephospho-CoA kinase domain containing                        | L359V only | 1.10 | 1.37 | 1.05 | 1.03 | 4.66E-01 | 1.09E-02 | 9.27E-01 | 1.00E+00 |
| 7978066 | NM_003917    | AP1G2        | adaptor-related protein complex 1, gamma 2 subunit            | L359V only | 1.14 | 1.36 | 1.04 | 1.03 | 2.84E-01 | 9.48E-03 | 9.43E-01 | 1.00E+00 |
| 7997662 | NM_014732    | KIAA0513     | KIAA0513                                                      | L359V only | 0.99 | 1.36 | 0.99 | 1.06 | 9.59E-01 | 3.36E-02 | 9.95E-01 | 1.00E+00 |
| 8155490 | AK292642     | LOC554249    | hypothetical LOC554249                                        | L359V only | 1.17 | 1.36 | 1.11 | 1.12 | 2.93E-01 | 2.42E-02 | 8.45E-01 | 1.00E+00 |
| 8015635 | NM_012232    | PTRF         | polymerase I and transcript release factor                    | L359V only | 1.24 | 1.36 | 1.16 | 1.22 | 1.24E-01 | 2.32E-02 | 7.97E-01 | 5.00E-01 |
| 8121461 | NM_015891    | CDC40        | cell division cycle 40 homolog (S. cerevisiae)                | L359V only | 0.95 | 1.36 | 0.93 | 1.06 | 7.70E-01 | 1.12E-02 | 8.76E-01 | 1.00E+00 |
| 8077123 | NM_152247    | CPT1B        | carnitine palmitoyltransferase 1B (muscle)                    | L359V only | 1.26 | 1.36 | 1.15 | 1.12 | 6.64E-02 | 1.33E-02 | 7.66E-01 | 9.88E-01 |
| 7917954 | NM_001013660 | FRRS1        | ferric-chelate reductase 1                                    | L359V only | 1.22 | 1.36 | 1.04 | 1.14 | 1.28E-01 | 1.49E-02 | 9.46E-01 | 8.38E-01 |
| 8012539 | NM_001010855 | PIK3R6       | phosphoinositide-3-kinase, regulatory subunit 6               | L359V only | 0.98 | 1.36 | 1.01 | 1.00 | 9.21E-01 | 8.26E-03 | 9.85E-01 | 1.00E+00 |
| 7915870 | NM_022745    | ATPAF1       | ATP synthase mitochondrial F1 complex assembly factor 1       | L359V only | 1.24 | 1.36 | 1.07 | 1.16 | 1.66E-01 | 3.36E-02 | 9.02E-01 | 8.90E-01 |
| 8031992 | AK294679     | tcag7.907    | hypothetical LOC402483                                        | L359V only | 1.02 | 1.36 | 1.11 | 1.06 | 9.34E-01 | 1.17E-02 | 8.30E-01 | 1.00E+00 |
| 8052024 | NM_025133    | FBXO11       | F-box protein 11                                              | L359V only | 1.28 | 1.36 | 1.09 | 1.16 | 5.02E-02 | 1.37E-02 | 8.52E-01 | 6.98E-01 |
| 8140967 | NM_017654    | SAMD9        | sterile alpha motif domain containing 9                       | L359V only | 1.27 | 1.36 | 1.00 | 1.10 | 1.30E-01 | 4.07E-02 | 9.99E-01 | 1.00E+00 |
| 8012054 | NM_001365    | DLG4         | discs, large homolog 4 (Drosophila)                           | L359V only | 1.29 | 1.36 | 1.21 | 1.15 | 1.22E-01 | 4.72E-02 | 7.38E-01 | 9.88E-01 |
| 8083569 | NM_015508    | TIPARP       | TCDD-inducible poly(ADP-ribose) polymerase                    | L359V only | 1.00 | 1.36 | 0.83 | 1.01 | 9.88E-01 | 2.30E-02 | 6.17E-01 | 1.00E+00 |
| 7963235 | NM_030809    | CSRN2        | cysteine-serine-rich nuclear protein 2                        | L359V only | 1.23 | 1.36 | 1.10 | 1.07 | 1.15E-01 | 1.67E-02 | 8.53E-01 | 1.00E+00 |
| 7961381 | NM_006143    | GPR19        | G protein-coupled receptor 19                                 | L359V only | 1.28 | 1.36 | 1.18 | 1.20 | 7.57E-02 | 2.20E-02 | 7.28E-01 | 6.19E-01 |
| 8165046 | NM_015447    | CAMSAP1      | calmodulin regulated spectrin-associated protein 1            | L359V only | 1.01 | 1.36 | 0.99 | 1.06 | 9.81E-01 | 1.60E-02 | 9.83E-01 | 1.00E+00 |
| 7956470 | NM_052897    | MBD6         | methyl-CpG binding domain protein 6                           | L359V only | 1.16 | 1.36 | 1.15 | 1.09 | 3.22E-01 | 2.46E-02 | 8.01E-01 | 1.00E+00 |
| 8118100 | NM_000247    | MICA         | MHC class I polypeptide-related sequence A                    | L359V only | 1.27 | 1.35 | 1.10 | 1.15 | 1.51E-01 | 4.88E-02 | 8.78E-01 | 1.00E+00 |
| 8123006 | NM_003898    | SYNJ2        | synaptojanin 2                                                | L359V only | 0.87 | 1.35 | 0.83 | 0.94 | 4.21E-01 | 4.55E-02 | 7.47E-01 | 1.00E+00 |
| 8083090 | NM_001080412 | ZBTB38       | zinc finger and BTB domain containing 38                      | L359V only | 1.08 | 1.35 | 0.94 | 1.09 | 7.13E-01 | 4.43E-02 | 9.28E-01 | 1.00E+00 |
| 7937438 | NM_174940    | TMEM80       | transmembrane protein 80                                      | L359V only | 1.08 | 1.35 | 1.16 | 1.12 | 6.38E-01 | 2.19E-02 | 7.74E-01 | 9.88E-01 |
| 7947801 | NM_016223    | PACSN3       | protein kinase C and casein kinase substrate in neurons 3     | L359V only | 1.10 | 1.35 | 1.16 | 1.15 | 5.16E-01 | 2.05E-02 | 7.53E-01 | 8.06E-01 |
| 8064100 | BC002531     | C20orf149    | chromosome 20 open reading frame 149                          | L359V only | 1.05 | 1.35 | 1.06 | 0.98 | 8.12E-01 | 4.45E-02 | 9.33E-01 | 1.00E+00 |
| 8026250 | NM_138353    | LOC90379     | hypothetical protein BC002926                                 | L359V only | 1.15 | 1.35 | 1.05 | 1.03 | 3.22E-01 | 2.05E-02 | 9.36E-01 | 1.00E+00 |
| 8028030 | NM_052948    | SNX26        | sorting nexin 26                                              | L359V only | 1.21 | 1.35 | 1.12 | 1.11 | 1.83E-01 | 2.92E-02 | 8.38E-01 | 1.00E+00 |
| 8031516 | NM_016202    | ZNF580       | zinc finger protein 580                                       | L359V only | 1.17 | 1.35 | 1.05 | 1.08 | 2.70E-01 | 2.51E-02 | 9.30E-01 | 1.00E+00 |
| 8145027 | NM_022749    | FAM160B2     | family with sequence similarity 160, member B2                | L359V only | 1.26 | 1.35 | 1.13 | 1.11 | 7.08E-02 | 1.76E-02 | 8.13E-01 | 1.00E+00 |
| 8154563 | NM_001010887 | ACER2        | alkaline ceramidase 2                                         | L359V only | 1.19 | 1.35 | 1.10 | 1.12 | 2.36E-01 | 2.84E-02 | 8.70E-01 | 1.00E+00 |
| 8092514 | NM_022149    | MAGEF1       | melanoma antigen family F, 1                                  | L359V only | 1.21 | 1.35 | 1.15 | 1.15 | 1.17E-01 | 1.48E-02 | 7.52E-01 | 7.32E-01 |
| 8074106 | NM_138433    | KLHDC7B      | kelch domain containing 7B                                    | L359V only | 1.11 | 1.35 | 1.23 | 1.17 | 4.91E-01 | 2.30E-02 | 5.20E-01 | 7.04E-01 |
| 8044563 | NM_032556    | IL1F10       | interleukin 1 family, member 10 (theta)                       | L359V only | 1.09 | 1.35 | 1.12 | 1.11 | 6.15E-01 | 2.85E-02 | 8.36E-01 | 1.00E+00 |
| 7912239 | NM_024980    | GPR157       | G protein-coupled receptor 157                                | L359V only | 1.21 | 1.34 | 1.12 | 1.16 | 2.20E-01 | 3.76E-02 | 8.43E-01 | 8.78E-01 |
| 7911591 | NM_001110781 | RP11-345P4.4 | similar to solute carrier family 35, member E2                | L359V only | 1.16 | 1.34 | 1.07 | 1.11 | 1.93E-01 | 1.10E-02 | 8.83E-01 | 9.54E-01 |
| 7970441 | NM_004004    | GJB2         | gap junction protein, beta 2, 26kDa                           | L359V only | 1.34 | 1.34 | 1.41 | 1.22 | 5.44E-02 | 3.94E-02 | 1.57E-01 | 5.85E-01 |
| 7953622 | AY358730     | UNQ2963      | hypothetical protein LOC283314                                | L359V only | 1.21 | 1.34 | 1.01 | 1.09 | 2.42E-01 | 4.42E-02 | 9.87E-01 | 1.00E+00 |
| 7998434 | NM_003294    | TPSAB1       | tryptase alpha                                                | L359V only | 1.06 | 1.34 | 1.06 | 1.08 | 8.06E-01 | 4.95E-02 | 9.26E-01 | 1.00E+00 |
| 8033956 | NM_004230    | S1PR2        | sphingosine-1-phosphate receptor 2                            | L359V only | 1.14 | 1.34 | 1.12 | 1.11 | 3.50E-01 | 2.12E-02 | 8.25E-01 | 1.00E+00 |
| 8075709 | NM_030643    | APOL4        | apolipoprotein L, 4                                           | L359V only | 1.24 | 1.34 | 0.97 | 1.11 | 1.39E-01 | 3.25E-02 | 9.58E-01 | 1.00E+00 |
| 7984569 | NM_017691    | LRRC49       | leucine rich repeat containing 49                             | L359V only | 1.25 | 1.34 | 0.93 | 1.08 | 1.04E-01 | 2.74E-02 | 8.90E-01 | 1.00E+00 |
| 7980983 | NM_022151    | MOAP1        | modulator of apoptosis 1                                      | L359V only | 1.24 | 1.34 | 1.13 | 1.16 | 6.71E-02 | 1.17E-02 | 7.79E-01 | 6.27E-01 |
| 8082100 | NM_017554    | PARP14       | poly (ADP-ribose) polymerase family, member 14                | L359V only | 1.24 | 1.34 | 0.85 | 1.05 | 1.77E-01 | 4.96E-02 | 7.97E-01 | 1.00E+00 |
| 7973158 | NM_018071    | FLJ10357     | hypothetical protein FLJ10357                                 | L359V only | 1.09 | 1.34 | 0.95 | 1.04 | 6.02E-01 | 2.46E-02 | 9.28E-01 | 1.00E+00 |
| 8172280 | NM_032591    | SLC9A7       | solute carrier family 9 (sodium hydrogen exchanger), member 7 | L359V only | 1.14 | 1.34 | 1.08 | 1.11 | 4.45E-01 | 4.23E-02 | 8.94E-01 | 1.00E+00 |
| 8014871 | NM_033419    | PERLD1       | per1-like domain containing 1                                 | L359V only | 1.28 | 1.34 | 1.01 | 1.12 | 1.06E-01 | 4.23E-02 | 9.86E-01 | 1.00E+00 |
| 8131709 | NM_003112    | SP4          | Sp4 transcription factor                                      | L359V only | 1.16 | 1.34 | 1.02 | 1.06 | 2.26E-01 | 1.30E-02 | 9.72E-01 | 1.00E+00 |
| 7963721 | NM_020898    | CALCOCO1     | calcium binding and coiled-coil domain 1                      | L359V only | 1.25 | 1.34 | 1.13 | 1.14 | 1.39E-01 | 4.07E-02 | 8.36E-01 | 1.00E+00 |
| 8086706 | NM_0014159   | SETD2        | SET domain containing 2                                       | L359V only | 1.24 | 1.34 | 1.00 | 1.07 | 7.45E-02 | 1.61E-02 | 9.97E-01 | 1.00E+00 |
| 8174692 | NM_145799    | SEPT6        | septin 6                                                      | L359V only | 1.00 | 1.33 | 1.01 | 1.06 | 9.99E-01 | 2.06E-02 | 9.94E-01 | 1.00E+00 |
| 8168557 | NM_003022    | SH3BGRL      | SH3 domain binding glutamic acid-rich protein like            | L359V only | 1.25 | 1.33 | 1.08 | 1.16 | 6.42E-02 | 1.47E-02 | 8.75E-01 | 6.28E-01 |
| 7939767 | NM_003682    | MADD         | MAP-kinase activating death domain                            | L359V only | 1.20 | 1.33 | 1.02 | 1.06 | 1.46E-01 | 1.91E-02 | 9.80E-01 | 1.00E+00 |
| 8154934 | NM_147162    | IL11RA       | interleukin 11 receptor, alpha                                | L359V only | 1.15 | 1.33 | 0.99 | 1.08 | 2.95E-01 | 2.09E-02 | 9.84E-01 | 1.00E+00 |
| 8155550 | AK292642     | LOC554249    | hypothetical LOC554249                                        | L359V only | 1.28 | 1.33 | 1.12 | 1.16 | 9.21E-02 | 4.08E-02 | 8.41E-01 | 8.90E-01 |
| 8118915 | NM_003427    | ZNF76        | zinc finger protein 76 (expressed in testis)                  | L359V only | 1.12 | 1.33 | 1.02 | 1.08 | 5.03E-01 | 4.65E-02 | 9.78E-01 | 1.00E+00 |
| 7925851 | NM_014023    | WDR37        | WD repeat domain 37                                           | L359V only | 0.96 | 1.33 | 0.95 | 1.03 | 8.21E-01 | 3.24E-02 | 9.29E-01 | 1.00E+00 |

|         |              |          |                                                                                     |            |      |      |      |      |          |          |          |          |
|---------|--------------|----------|-------------------------------------------------------------------------------------|------------|------|------|------|------|----------|----------|----------|----------|
| 8017186 | NM_022070    | HEATR6   | HEAT repeat containing 6                                                            | L359V only | 1.11 | 1.33 | 0.97 | 1.08 | 4.24E-01 | 1.59E-02 | 9.52E-01 | 1.00E+00 |
| 8150881 | NM_002655    | PLAG1    | pleiomorphic adenoma gene 1                                                         | L359V only | 1.14 | 1.33 | 1.10 | 1.15 | 3.96E-01 | 3.19E-02 | 8.59E-01 | 8.78E-01 |
| 7980338 | NM_024496    | C14orf4  | chromosome 14 open reading frame 4                                                  | L359V only | 1.06 | 1.33 | 0.99 | 1.04 | 7.54E-01 | 2.48E-02 | 9.84E-01 | 1.00E+00 |
| 8169920 | NM_016024    | RBMX2    | RNA binding motif protein, X-linked 2                                               | L359V only | 1.01 | 1.33 | 1.05 | 1.08 | 9.72E-01 | 3.07E-02 | 9.27E-01 | 1.00E+00 |
| 7901479 | NM_024646    | ZYG11B   | zyg-11 homolog B (C. elegans)                                                       | L359V only | 1.26 | 1.33 | 1.04 | 1.12 | 1.25E-01 | 4.53E-02 | 9.55E-01 | 1.00E+00 |
| 7997247 | NM_032268    | ZNRF1    | zinc and ring finger 1                                                              | L359V only | 1.17 | 1.33 | 1.08 | 1.08 | 2.60E-01 | 2.55E-02 | 8.83E-01 | 1.00E+00 |
| 7970844 | NM_001014380 | KATNAL1  | katanin p60 subunit A-like 1                                                        | L359V only | 1.24 | 1.33 | 1.02 | 1.10 | 1.44E-01 | 4.07E-02 | 9.82E-01 | 1.00E+00 |
| 8029831 | NM_005184    | CALM3    | calmodulin 3 (phosphorylase kinase, delta)                                          | L359V only | 1.19 | 1.33 | 1.09 | 1.07 | 9.51E-02 | 8.88E-03 | 8.36E-01 | 1.00E+00 |
| 7975889 | NM_014909    | VASH1    | vasohibin 1                                                                         | L359V only | 1.04 | 1.33 | 0.98 | 1.05 | 8.33E-01 | 2.39E-02 | 9.73E-01 | 1.00E+00 |
| 8036956 | NM_198476    | C19orf54 | chromosome 19 open reading frame 54                                                 | L359V only | 1.16 | 1.33 | 1.07 | 1.02 | 1.88E-01 | 1.04E-02 | 8.77E-01 | 1.00E+00 |
| 7911754 | NM_003820    | TNFRSF14 | tumor necrosis factor receptor superfamily, member 14 (herpesvirus entry mediator)  | L359V only | 1.06 | 1.33 | 0.99 | 1.02 | 6.94E-01 | 1.34E-02 | 9.91E-01 | 1.00E+00 |
| 7938364 | BX641032     | WEE1     | WEE1 homolog (S. pombe)                                                             | L359V only | 1.30 | 1.33 | 1.12 | 1.16 | 6.26E-02 | 3.25E-02 | 8.34E-01 | 7.91E-01 |
| 8017262 | NM_032043    | BRIP1    | BRCA1 interacting protein C-terminal helicase 1                                     | L359V only | 1.22 | 1.33 | 0.99 | 1.14 | 1.17E-01 | 2.26E-02 | 9.92E-01 | 8.41E-01 |
| 8037621 | NM_012155    | EML2     | echinoderm microtubule associated protein like 2                                    | L359V only | 1.24 | 1.32 | 1.15 | 1.12 | 7.84E-02 | 2.02E-02 | 7.46E-01 | 9.81E-01 |
| 7929288 | NM_019053    | EXOC6    | exocyst complex component 6                                                         | L359V only | 1.20 | 1.32 | 0.99 | 1.12 | 1.22E-01 | 1.62E-02 | 9.81E-01 | 8.90E-01 |
| 8047443 | NM_018571    | STRADB   | STE20-related kinase adaptor beta                                                   | L359V only | 1.19 | 1.32 | 1.00 | 1.11 | 2.33E-01 | 4.22E-02 | 9.99E-01 | 1.00E+00 |
| 8102862 | NM_018717    | MAML3    | mastermind-like 3 (Drosophila)                                                      | L359V only | 1.12 | 1.32 | 0.92 | 1.02 | 4.39E-01 | 2.55E-02 | 8.70E-01 | 1.00E+00 |
| 7989680 | NM_025049    | PIF1     | PIF1 5'-to-3' DNA helicase homolog (S. cerevisiae)                                  | L359V only | 1.17 | 1.32 | 1.13 | 1.12 | 2.58E-01 | 2.69E-02 | 8.11E-01 | 1.00E+00 |
| 7998381 | NM_022773    | LMF1     | lipase maturation factor 1                                                          | L359V only | 1.16 | 1.32 | 1.13 | 1.12 | 2.67E-01 | 2.46E-02 | 8.14E-01 | 9.89E-01 |
| 7955195 | NM_005480    | TROAP    | trophinin associated protein (tastin)                                               | L359V only | 1.23 | 1.32 | 1.16 | 1.09 | 9.34E-02 | 2.22E-02 | 7.36E-01 | 1.00E+00 |
| 8156116 | NM_001001551 | C9orf103 | chromosome 9 open reading frame 103                                                 | L359V only | 1.14 | 1.32 | 0.99 | 1.09 | 3.95E-01 | 4.16E-02 | 9.89E-01 | 1.00E+00 |
| 7957549 | ---          | ---      | ---                                                                                 | L359V only | 1.19 | 1.32 | 1.11 | 1.06 | 1.93E-01 | 2.91E-02 | 8.38E-01 | 1.00E+00 |
| 8015946 | NM_178542    | C17orf65 | chromosome 17 open reading frame 65                                                 | L359V only | 1.24 | 1.32 | 1.10 | 1.10 | 1.15E-01 | 3.02E-02 | 8.61E-01 | 1.00E+00 |
| 8078898 | NM_017875    | SLC25A38 | solute carrier family 25, member 38                                                 | L359V only | 1.23 | 1.32 | 1.29 | 1.19 | 1.80E-01 | 4.98E-02 | 4.14E-01 | 7.37E-01 |
| 8081431 | NM_001627    | ALCAM    | activated leukocyte cell adhesion molecule                                          | L359V only | 1.06 | 1.32 | 0.99 | 1.10 | 7.00E-01 | 1.84E-02 | 9.85E-01 | 1.00E+00 |
| 8060370 | NM_031424    | FAM110A  | family with sequence similarity 110, member A                                       | L359V only | 1.28 | 1.32 | 1.24 | 1.18 | 8.37E-02 | 4.23E-02 | 5.21E-01 | 7.37E-01 |
| 8010050 | BC035511     | FAM100B  | family with sequence similarity 100, member B                                       | L359V only | 1.24 | 1.32 | 1.22 | 1.16 | 9.33E-02 | 2.66E-02 | 5.08E-01 | 7.09E-01 |
| 7955168 | ---          | ---      | ---                                                                                 | L359V only | 1.01 | 1.31 | 1.07 | 1.07 | 9.83E-01 | 4.60E-02 | 9.02E-01 | 1.00E+00 |
| 8036862 | AY358191     | UNQ6167  | NINP6167                                                                            | L359V only | 0.98 | 1.31 | 1.04 | 1.04 | 9.23E-01 | 4.32E-02 | 9.54E-01 | 1.00E+00 |
| 8050894 | NM_002254    | KIF3C    | kinesin family member 3C                                                            | L359V only | 1.17 | 1.31 | 1.03 | 1.03 | 2.87E-01 | 4.29E-02 | 9.72E-01 | 1.00E+00 |
| 7940891 | NM_005528    | DNAJC4   | DnaJ (Hsp40) homolog, subfamily C, member 4                                         | L359V only | 1.28 | 1.31 | 1.16 | 1.14 | 6.36E-02 | 2.91E-02 | 7.50E-01 | 8.90E-01 |
| 7944049 | NM_001040455 | SIDT2    | SID1 transmembrane family, member 2                                                 | L359V only | 1.26 | 1.31 | 1.13 | 1.14 | 8.32E-02 | 2.94E-02 | 8.19E-01 | 8.92E-01 |
| 8162177 | ---          | ---      | ---                                                                                 | L359V only | 1.03 | 1.31 | 0.98 | 1.05 | 8.87E-01 | 1.74E-02 | 9.72E-01 | 1.00E+00 |
| 8008052 | NM_003110    | SP2      | Sp2 transcription factor                                                            | L359V only | 1.19 | 1.31 | 1.01 | 1.02 | 2.21E-01 | 3.59E-02 | 9.90E-01 | 1.00E+00 |
| 8091141 | NM_019001    | XRN1     | 5'-3' exoribonuclease 1                                                             | L359V only | 1.31 | 1.31 | 1.00 | 1.11 | 6.04E-02 | 4.27E-02 | 9.97E-01 | 1.00E+00 |
| 7956978 | NM_018656    | SLC35E3  | solute carrier family 35, member E3                                                 | L359V only | 1.19 | 1.31 | 1.07 | 1.13 | 2.08E-01 | 3.60E-02 | 9.02E-01 | 9.81E-01 |
| 8085138 | NM_000916    | OXTR     | oxytocin receptor                                                                   | L359V only | 1.16 | 1.31 | 1.21 | 1.13 | 3.08E-01 | 4.08E-02 | 6.28E-01 | 1.00E+00 |
| 8027128 | NM_178526    | SLC25A42 | solute carrier family 25, member 42                                                 | L359V only | 1.23 | 1.31 | 1.13 | 1.11 | 8.31E-02 | 2.14E-02 | 8.01E-01 | 9.81E-01 |
| 8139656 | NM_001001555 | GRB10    | growth factor receptor-bound protein 10                                             | L359V only | 1.21 | 1.31 | 1.13 | 1.17 | 1.32E-01 | 2.53E-02 | 8.01E-01 | 6.47E-01 |
| 7976350 | NM_020818    | KIAA1409 | KIAA1409                                                                            | L359V only | 1.13 | 1.31 | 1.10 | 1.12 | 3.96E-01 | 3.21E-02 | 8.49E-01 | 9.94E-01 |
| 8174207 | NM_022052    | NXF3     | nuclear RNA export factor 3                                                         | L359V only | 0.85 | 1.31 | 0.87 | 1.05 | 2.80E-01 | 4.22E-02 | 8.01E-01 | 1.00E+00 |
| 8165833 | NM_001011719 | ARSH     | arylsulfatase family, member H                                                      | L359V only | 1.05 | 1.31 | 1.08 | 1.11 | 8.00E-01 | 3.44E-02 | 8.80E-01 | 1.00E+00 |
| 7998233 | NM_021259    | TMEM8    | transmembrane protein 8 (five membrane-spanning domains)                            | L359V only | 1.12 | 1.31 | 1.02 | 0.97 | 4.32E-01 | 2.99E-02 | 9.76E-01 | 1.00E+00 |
| 8140129 | NM_148912    | ABHD11   | abhydrolase domain containing 11                                                    | L359V only | 1.13 | 1.31 | 1.03 | 1.06 | 4.09E-01 | 4.18E-02 | 9.62E-01 | 1.00E+00 |
| 8074286 | NM_015241    | MICAL3   | microtubule associated monooxygenase, calponin and LIM domain containing 3          | L359V only | 1.16 | 1.31 | 0.98 | 1.06 | 3.18E-01 | 4.96E-02 | 9.78E-01 | 1.00E+00 |
| 8007730 | NM_001135704 | ACBD4    | acyl-Coenzyme A binding domain containing 4                                         | L359V only | 1.21 | 1.31 | 1.03 | 1.10 | 8.89E-02 | 1.70E-02 | 9.59E-01 | 9.92E-01 |
| 8080714 | NM_001457    | FLNB     | filamin B, beta (actin binding protein 278)                                         | L359V only | 1.13 | 1.31 | 1.06 | 1.07 | 3.31E-01 | 1.82E-02 | 8.93E-01 | 1.00E+00 |
| 7966517 | NM_001109662 | C12orf51 | chromosome 12 open reading frame 51                                                 | L359V only | 1.20 | 1.30 | 0.96 | 1.07 | 1.52E-01 | 2.64E-02 | 9.39E-01 | 1.00E+00 |
| 8177834 | NM_024909    | C6orf134 | chromosome 6 open reading frame 134                                                 | L359V only | 1.23 | 1.30 | 1.12 | 1.08 | 1.37E-01 | 4.22E-02 | 8.36E-01 | 1.00E+00 |
| 7931081 | NM_021622    | PLEKHA1  | pleckstrin homology domain containing, family A (phosphoinositide binding specific) | L359V only | 1.17 | 1.30 | 1.10 | 1.10 | 1.83E-01 | 2.17E-02 | 8.36E-01 | 1.00E+00 |
| 7950271 | EF363480     | FAM168A  | family with sequence similarity 168, member A                                       | L359V only | 1.21 | 1.30 | 1.07 | 1.10 | 9.47E-02 | 1.96E-02 | 8.79E-01 | 1.00E+00 |
| 8043055 | NM_001370    | DNAH6    | dynein, axonemal, heavy chain 6                                                     | L359V only | 1.02 | 1.30 | 1.10 | 1.11 | 9.15E-01 | 4.77E-02 | 8.58E-01 | 1.00E+00 |
| 8085556 | NM_004844    | SH3BP5   | SH3-domain binding protein 5 (BTK-associated)                                       | L359V only | 1.17 | 1.30 | 0.96 | 1.08 | 2.42E-01 | 3.46E-02 | 9.38E-01 | 1.00E+00 |
| 8015412 | NM_002230    | JUP      | junction plakoglobin                                                                | L359V only | 1.21 | 1.30 | 1.13 | 1.10 | 1.57E-01 | 3.33E-02 | 8.14E-01 | 1.00E+00 |
| 8043666 | NM_017623    | CNNM3    | cyclin M3                                                                           | L359V only | 1.09 | 1.30 | 0.93 | 0.94 | 5.91E-01 | 3.98E-02 | 8.83E-01 | 1.00E+00 |
| 8125220 | NM_005510    | DOM3Z    | dom-3 homolog Z (C. elegans)                                                        | L359V only | 1.08 | 1.30 | 1.14 | 1.08 | 6.13E-01 | 3.56E-02 | 8.11E-01 | 1.00E+00 |
| 8178699 | NM_005510    | DOM3Z    | dom-3 homolog Z (C. elegans)                                                        | L359V only | 1.08 | 1.30 | 1.14 | 1.08 | 6.13E-01 | 3.56E-02 | 8.11E-01 | 1.00E+00 |
| 8172056 | NM_000328    | RPGR     | retinitis pigmentosa GTPase regulator                                               | L359V only | 1.24 | 1.30 | 1.24 | 1.22 | 1.26E-01 | 4.43E-02 | 5.03E-01 | 5.05E-01 |
| 8050548 | NM_014713    | LAPTM4A  | lysosomal protein transmembrane 4 alpha                                             | L359V only | 1.21 | 1.30 | 1.07 | 1.10 | 1.59E-01 | 3.70E-02 | 8.86E-01 | 1.00E+00 |
| 8173217 | NM_015185    | ARHGEF9  | Cdc42 guanine nucleotide exchange factor (GEF) 9                                    | L359V only | 1.17 | 1.30 | 1.08 | 1.07 | 2.63E-01 | 4.08E-02 | 8.86E-01 | 1.00E+00 |
| 8179926 | NM_005510    | DOM3Z    | dom-3 homolog Z (C. elegans)                                                        | L359V only | 1.05 | 1.30 | 1.12 | 1.06 | 7.90E-01 | 4.93E-02 | 8.36E-01 | 1.00E+00 |
| 7940210 | NM_173801    | PLAC1L   | placenta-specific 1-like                                                            | L359V only | 0.91 | 1.30 | 0.99 | 1.01 | 5.19E-01 | 4.17E-02 | 9.95E-01 | 1.00E+00 |
| 7897561 | NM_015074    | KIF1B    | kinesin family member 1B                                                            | L359V only | 1.10 | 1.30 | 1.08 | 1.10 | 4.51E-01 | 1.94E-02 | 8.56E-01 | 1.00E+00 |
| 8009796 | NM_014738    | KIAA0195 | KIAA0195                                                                            | L359V only | 1.12 | 1.30 | 1.03 | 1.06 | 2.90E-01 | 1.37E-02 | 9.41E-01 | 1.00E+00 |
| 8111271 | NM_016279    | CDH9     | cadherin 9, type 2 (T1-cadherin)                                                    | L359V only | 1.19 | 1.29 | 1.26 | 1.17 | 2.10E-01 | 4.26E-02 | 3.99E-01 | 7.32E-01 |



|         |              |              |                                                                                                 |            |      |      |      |      |          |          |          |          |
|---------|--------------|--------------|-------------------------------------------------------------------------------------------------|------------|------|------|------|------|----------|----------|----------|----------|
| 8107474 | NM_005509    | DMXL1        | Dmx-like 1                                                                                      | L359V only | 1.25 | 1.29 | 1.12 | 1.14 | 5.13E-02 | 2.10E-02 | 8.06E-01 | 7.47E-01 |
| 7902353 | NM_001001933 | LHX8         | LIM homeobox 8                                                                                  | L359V only | 1.06 | 1.29 | 1.03 | 1.08 | 7.31E-01 | 4.83E-02 | 9.64E-01 | 1.00E+00 |
| 8147221 | NM_004337    | OSGIN2       | oxidative stress induced growth inhibitor family member 2                                       | L359V only | 1.28 | 1.29 | 1.01 | 1.09 | 6.36E-02 | 4.08E-02 | 9.93E-01 | 1.00E+00 |
| 8104590 | AK129556     | LOC100130744 | hypothetical LOC100130744                                                                       | L359V only | 1.22 | 1.29 | 1.04 | 1.03 | 1.49E-01 | 4.37E-02 | 9.43E-01 | 1.00E+00 |
| 8117965 | NM_024909    | C6orf134     | chromosome 6 open reading frame 134                                                             | L359V only | 1.24 | 1.29 | 1.13 | 1.09 | 1.17E-01 | 4.58E-02 | 8.14E-01 | 1.00E+00 |
| 8179149 | NM_024909    | C6orf134     | chromosome 6 open reading frame 134                                                             | L359V only | 1.24 | 1.29 | 1.13 | 1.09 | 1.17E-01 | 4.58E-02 | 8.14E-01 | 1.00E+00 |
| 8159945 | NM_016282    | AK3          | adenylate kinase 3                                                                              | L359V only | 1.21 | 1.29 | 1.14 | 1.16 | 1.20E-01 | 2.81E-02 | 7.79E-01 | 6.40E-01 |
| 8086961 | NM_004567    | PFKFB4       | 6-phosphofructo-2-kinase                                                                        | L359V only | 0.98 | 1.29 | 0.96 | 1.03 | 9.38E-01 | 3.09E-02 | 9.43E-01 | 1.00E+00 |
| 8178399 | NM_007243    | NRM          | nurim (nuclear envelope membrane protein)                                                       | L359V only | 1.12 | 1.29 | 1.02 | 1.05 | 4.58E-01 | 4.84E-02 | 9.77E-01 | 1.00E+00 |
| 8179683 | NM_007243    | NRM          | nurim (nuclear envelope membrane protein)                                                       | L359V only | 1.12 | 1.29 | 1.02 | 1.05 | 4.58E-01 | 4.84E-02 | 9.77E-01 | 1.00E+00 |
| 8037657 | NM_004409    | DMPK         | dystrophia myotonica-protein kinase                                                             | L359V only | 1.15 | 1.29 | 1.03 | 1.09 | 2.19E-01 | 2.09E-02 | 9.46E-01 | 1.00E+00 |
| 8128737 | NM_022765    | MICAL1       | microtubule associated monooxygenase, calponin and LIM domain containing 1                      | L359V only | 1.15 | 1.29 | 1.20 | 1.12 | 2.13E-01 | 2.08E-02 | 4.84E-01 | 8.90E-01 |
| 8035271 | NM_024527    | ABHD8        | abhydrolase domain containing 8                                                                 | L359V only | 1.20 | 1.29 | 1.07 | 1.12 | 1.84E-01 | 4.82E-02 | 8.94E-01 | 1.00E+00 |
| 8093456 | NM_052861    | C4orf42      | chromosome 4 open reading frame 42                                                              | L359V only | 1.14 | 1.29 | 1.02 | 1.00 | 3.16E-01 | 2.85E-02 | 9.73E-01 | 1.00E+00 |
| 7974771 | NM_022495    | C14orf135    | chromosome 14 open reading frame 135                                                            | L359V only | 1.05 | 1.29 | 0.99 | 1.09 | 7.85E-01 | 3.45E-02 | 9.94E-01 | 1.00E+00 |
| 7991779 | NM_032039    | ITFG3        | integrin alpha FG-GAP repeat containing 3                                                       | L359V only | 1.11 | 1.29 | 1.08 | 1.08 | 4.35E-01 | 3.43E-02 | 8.73E-01 | 1.00E+00 |
| 8161114 | NM_020944    | GBA2         | glucosidase, beta (bile acid) 2                                                                 | L359V only | 1.26 | 1.29 | 1.00 | 1.01 | 6.47E-02 | 3.39E-02 | 9.97E-01 | 1.00E+00 |
| 7900633 | ---          | ---          | ---                                                                                             | L359V only | 1.01 | 1.29 | 1.23 | 1.11 | 9.76E-01 | 3.33E-02 | 4.49E-01 | 9.92E-01 |
| 7996012 | NM_012106    | ARL2BP       | ADP-ribosylation factor-like 2 binding protein                                                  | L359V only | 1.17 | 1.29 | 1.05 | 1.08 | 2.54E-01 | 4.86E-02 | 9.36E-01 | 1.00E+00 |
| 7935660 | NM_015221    | DNMBP        | dynamamin binding protein                                                                       | L359V only | 1.20 | 1.29 | 0.97 | 1.08 | 1.10E-01 | 2.09E-02 | 9.52E-01 | 1.00E+00 |
| 8101701 | NM_152542    | PPM1K        | protein phosphatase 1K (PP2C domain containing)                                                 | L359V only | 1.26 | 1.28 | 1.09 | 1.14 | 6.97E-02 | 3.67E-02 | 8.56E-01 | 8.61E-01 |
| 7956097 | NM_000456    | SUOX         | sulfite oxidase                                                                                 | L359V only | 1.29 | 1.28 | 1.17 | 1.07 | 5.54E-02 | 4.71E-02 | 7.38E-01 | 1.00E+00 |
| 8148270 | NM_005005    | NDUFB9       | NADH dehydrogenase (ubiquinone) 1 beta subcomplex, 9, 22kDa                                     | L359V only | 1.16 | 1.28 | 1.01 | 1.08 | 2.07E-01 | 2.79E-02 | 9.92E-01 | 1.00E+00 |
| 7942697 | NM_004055    | CAPN5        | calpain 5                                                                                       | L359V only | 1.07 | 1.28 | 1.04 | 1.07 | 6.97E-01 | 4.85E-02 | 9.38E-01 | 1.00E+00 |
| 7936968 | NM_003474    | ADAM12       | ADAM metalloproteinase domain 12                                                                | L359V only | 1.14 | 1.28 | 1.15 | 1.12 | 2.90E-01 | 2.81E-02 | 7.40E-01 | 8.78E-01 |
| 7935780 | NM_015490    | SEC31B       | SEC31 homolog B (S. cerevisiae)                                                                 | L359V only | 1.01 | 1.28 | 1.04 | 1.04 | 9.64E-01 | 4.84E-02 | 9.39E-01 | 1.00E+00 |
| 7919971 | NM_000449    | RFX5         | regulatory factor X, 5 (influences HLA class II expression)                                     | L359V only | 1.25 | 1.28 | 1.08 | 1.15 | 7.93E-02 | 3.75E-02 | 8.70E-01 | 7.48E-01 |
| 8172088 | NM_001123385 | BCOR         | BCL6 co-repressor                                                                               | L359V only | 1.28 | 1.28 | 1.06 | 1.07 | 5.02E-02 | 3.89E-02 | 9.07E-01 | 1.00E+00 |
| 8114083 | NM_014423    | AFF4         | AF4                                                                                             | L359V only | 1.24 | 1.28 | 1.02 | 1.10 | 6.28E-02 | 2.84E-02 | 9.76E-01 | 1.00E+00 |
| 8085000 | NM_032773    | LRCH3        | leucine-rich repeats and calponin homology (CH) domain containing 3                             | L359V only | 1.25 | 1.28 | 0.99 | 1.10 | 5.88E-02 | 2.99E-02 | 9.83E-01 | 1.00E+00 |
| 8141445 | BC015722     | C7orf43      | chromosome 7 open reading frame 43                                                              | L359V only | 1.06 | 1.28 | 1.04 | 1.02 | 7.16E-01 | 3.84E-02 | 9.39E-01 | 1.00E+00 |
| 7977841 | BC001916     | C14orf94     | chromosome 14 open reading frame 94                                                             | L359V only | 1.18 | 1.28 | 1.04 | 1.14 | 1.84E-01 | 3.62E-02 | 9.39E-01 | 8.21E-01 |
| 7975705 | NM_194279    | ISCA2        | iron-sulfur cluster assembly 2 homolog (S. cerevisiae)                                          | L359V only | 1.14 | 1.28 | 1.05 | 1.08 | 3.05E-01 | 3.61E-02 | 9.29E-01 | 1.00E+00 |
| 8047839 | NM_004379    | CREB1        | cAMP responsive element binding protein 1                                                       | L359V only | 1.21 | 1.28 | 0.99 | 1.10 | 7.34E-02 | 1.81E-02 | 9.83E-01 | 9.81E-01 |
| 8044959 | ---          | ---          | ---                                                                                             | L359V only | 1.05 | 1.28 | 1.06 | 1.09 | 7.34E-01 | 1.75E-02 | 8.80E-01 | 1.00E+00 |
| 8069399 | NM_015151    | DIP2A        | DIP2 disco-interacting protein 2 homolog A (Drosophila)                                         | L359V only | 1.09 | 1.28 | 1.01 | 1.05 | 5.63E-01 | 3.37E-02 | 9.90E-01 | 1.00E+00 |
| 8029642 | NM_031417    | MARK4        | MAP microtubule affinity-regulating kinase 4                                                    | L359V only | 1.12 | 1.27 | 1.13 | 1.05 | 3.68E-01 | 3.03E-02 | 7.97E-01 | 1.00E+00 |
| 8130827 | AB016899     | C6orf54      | chromosome 6 open reading frame 54                                                              | L359V only | 1.22 | 1.27 | 1.03 | 1.09 | 1.19E-01 | 4.19E-02 | 9.51E-01 | 1.00E+00 |
| 8036938 | NM_024876    | ADCK4        | aarF domain containing kinase 4                                                                 | L359V only | 1.23 | 1.27 | 1.16 | 1.13 | 7.63E-02 | 2.95E-02 | 6.86E-01 | 8.21E-01 |
| 7984203 | NM_015042    | ZNF609       | zinc finger protein 609                                                                         | L359V only | 1.18 | 1.27 | 1.07 | 1.04 | 1.75E-01 | 3.23E-02 | 8.84E-01 | 1.00E+00 |
| 8022646 | NM_001136205 | KCTD1        | potassium channel tetramerisation domain containing 1                                           | L359V only | 1.05 | 1.27 | 1.21 | 1.11 | 7.66E-01 | 4.61E-02 | 5.33E-01 | 1.00E+00 |
| 8065832 | NM_015638    | TRPC4AP      | transient receptor potential cation channel, subfamily C, member 4 associated protein 1         | L359V only | 1.13 | 1.27 | 1.09 | 1.13 | 4.00E-01 | 4.90E-02 | 8.63E-01 | 9.05E-01 |
| 8018449 | NM_199242    | UNC13D       | unc-13 homolog D (C. elegans)                                                                   | L359V only | 1.03 | 1.27 | 1.03 | 1.00 | 8.96E-01 | 3.56E-02 | 9.55E-01 | 1.00E+00 |
| 8009443 | NM_014960    | ARSG         | arylsulfatase G                                                                                 | L359V only | 1.22 | 1.27 | 1.11 | 1.12 | 8.21E-02 | 2.84E-02 | 8.23E-01 | 8.78E-01 |
| 7946180 | NM_006458    | TRIM3        | tripartite motif-containing 3                                                                   | L359V only | 1.14 | 1.27 | 1.21 | 1.15 | 3.09E-01 | 4.23E-02 | 5.00E-01 | 7.32E-01 |
| 7955078 | NM_000289    | PFKM         | phosphofructokinase, muscle                                                                     | L359V only | 1.07 | 1.27 | 1.04 | 1.07 | 6.71E-01 | 4.93E-02 | 9.43E-01 | 1.00E+00 |
| 8171024 | AK127459     | LOC401622    | similar to LINE-1 reverse transcriptase homolog                                                 | L359V only | 1.13 | 1.27 | 0.94 | 1.05 | 3.14E-01 | 3.74E-02 | 8.92E-01 | 1.00E+00 |
| 7994889 | NM_006662    | SRCAP        | Snf2-related CREBBP activator protein                                                           | L359V only | 1.08 | 1.27 | 1.00 | 0.97 | 6.06E-01 | 4.83E-02 | 9.99E-01 | 1.00E+00 |
| 8158269 | NM_002540    | ODF2         | outer dense fiber of sperm tails 2                                                              | L359V only | 0.94 | 1.27 | 0.95 | 1.05 | 6.73E-01 | 2.87E-02 | 8.99E-01 | 1.00E+00 |
| 8028016 | NM_001039887 | C19orf55     | chromosome 19 open reading frame 55                                                             | L359V only | 1.03 | 1.26 | 1.08 | 1.03 | 8.53E-01 | 2.88E-02 | 8.60E-01 | 1.00E+00 |
| 7933509 | NM_000124    | ERCC6        | excision repair cross-complementing rodent repair deficiency, complementation group 6           | L359V only | 1.12 | 1.26 | 0.98 | 1.07 | 3.63E-01 | 4.22E-02 | 9.64E-01 | 1.00E+00 |
| 7994506 | NM_032815    | NFATC2IP     | nuclear factor of activated T-cells, cytoplasmic, calcineurin-dependent 2 interacting protein 1 | L359V only | 1.12 | 1.26 | 1.01 | 1.04 | 3.27E-01 | 2.85E-02 | 9.83E-01 | 1.00E+00 |
| 8071185 | NR_002733    | DGCR5        | DiGeorge syndrome critical region gene 5 (non-protein coding)                                   | L359V only | 0.95 | 1.26 | 1.07 | 1.07 | 7.69E-01 | 4.61E-02 | 8.81E-01 | 1.00E+00 |
| 8007799 | AK295559     | CRHR1        | corticotropin releasing hormone receptor 1                                                      | L359V only | 1.21 | 1.26 | 1.08 | 1.13 | 1.05E-01 | 3.97E-02 | 8.76E-01 | 8.60E-01 |
| 7964203 | NM_013449    | BAZZA        | bromodomain adjacent to zinc finger domain, 2A                                                  | L359V only | 1.09 | 1.26 | 1.04 | 0.99 | 4.71E-01 | 3.06E-02 | 9.37E-01 | 1.00E+00 |
| 8167334 | NM_000377    | WAS          | Wiskott-Aldrich syndrome (eczema-thrombocytopenia)                                              | L359V only | 1.10 | 1.26 | 1.07 | 0.97 | 4.57E-01 | 4.43E-02 | 8.83E-01 | 1.00E+00 |
| 7947652 | NM_017749    | AMBRA1       | autophagy                                                                                       | L359V only | 1.14 | 1.26 | 1.13 | 1.07 | 2.76E-01 | 3.46E-02 | 7.82E-01 | 1.00E+00 |
| 7979849 | NM_003861    | WDR22        | WD repeat domain 22                                                                             | L359V only | 1.15 | 1.26 | 1.00 | 1.08 | 2.02E-01 | 3.14E-02 | 9.94E-01 | 1.00E+00 |
| 7971950 | NM_080759    | DACH1        | dachshund homolog 1 (Drosophila)                                                                | L359V only | 1.08 | 1.25 | 1.05 | 1.01 | 5.91E-01 | 3.43E-02 | 9.15E-01 | 1.00E+00 |
| 8172538 | NM_007075    | WDR45        | WD repeat domain 45                                                                             | L359V only | 1.15 | 1.25 | 1.14 | 1.14 | 2.41E-01 | 3.47E-02 | 7.51E-01 | 6.95E-01 |
| 8096333 | ---          | ---          | ---                                                                                             | L359V only | 0.98 | 1.25 | 1.01 | 1.03 | 9.09E-01 | 3.91E-02 | 9.85E-01 | 1.00E+00 |
| 7999319 | NM_014316    | CARHSP1      | calcium regulated heat stable protein 1, 24kDa                                                  | L359V only | 1.24 | 1.25 | 1.05 | 1.07 | 7.55E-02 | 4.81E-02 | 9.22E-01 | 1.00E+00 |
| 8025255 | NM_006949    | STXBP2       | syntaxin binding protein 2                                                                      | L359V only | 1.05 | 1.25 | 1.01 | 1.03 | 7.66E-01 | 4.61E-02 | 9.92E-01 | 1.00E+00 |
| 7972297 | NM_005845    | ABCC4        | ATP-binding cassette, sub-family C (CFTR MRP), member 4                                         | L359V only | 1.04 | 1.25 | 0.94 | 1.05 | 8.09E-01 | 3.84E-02 | 8.94E-01 | 1.00E+00 |
| 7916986 | NM_173808    | NEGR1        | neuronal growth regulator 1                                                                     | L359V only | 1.09 | 1.25 | 1.12 | 1.12 | 5.36E-01 | 3.89E-02 | 8.01E-01 | 8.47E-01 |

|         |              |          |                                                                                   |            |      |      |      |      |          |          |          |          |
|---------|--------------|----------|-----------------------------------------------------------------------------------|------------|------|------|------|------|----------|----------|----------|----------|
| 8081362 | NM_024548    | CEP97    | centrosomal protein 97kDa                                                         | L359V only | 1.26 | 1.25 | 1.04 | 1.11 | 5.03E-02 | 4.54E-02 | 9.44E-01 | 9.88E-01 |
| 7981046 | NM_032036    | IFI27L2  | interferon, alpha-inducible protein 27-like 2                                     | L359V only | 1.19 | 1.25 | 1.10 | 1.08 | 1.47E-01 | 4.56E-02 | 8.38E-01 | 1.00E+00 |
| 7958202 | NM_018413    | CHST11   | carbohydrate (chondroitin 4) sulfotransferase 11                                  | L359V only | 1.22 | 1.25 | 1.13 | 1.14 | 8.48E-02 | 4.39E-02 | 7.94E-01 | 7.89E-01 |
| 8000811 | NM_001040056 | MAPK3    | mitogen-activated protein kinase 3                                                | L359V only | 1.12 | 1.25 | 1.09 | 1.06 | 3.59E-01 | 4.90E-02 | 8.59E-01 | 1.00E+00 |
| 8161618 | NM_001163    | APBA1    | amyloid beta (A4) precursor protein-binding, family A, member 1                   | L359V only | 1.14 | 1.24 | 1.21 | 1.15 | 2.46E-01 | 4.37E-02 | 4.33E-01 | 6.69E-01 |
| 8125360 | NM_002586    | PBX2     | pre-B-cell leukemia homeobox 2                                                    | L359V only | 1.23 | 1.24 | 1.05 | 1.06 | 5.89E-02 | 3.53E-02 | 9.12E-01 | 1.00E+00 |
| 8172119 | NM_004229    | MED14    | mediator complex subunit 14                                                       | L359V only | 1.13 | 1.24 | 1.04 | 1.04 | 2.89E-01 | 4.45E-02 | 9.39E-01 | 1.00E+00 |
| 7940824 | NM_024771    | NAT11    | N-acetyltransferase 11 (GCN5-related, putative)                                   | L359V only | 1.07 | 1.24 | 1.02 | 1.00 | 6.36E-01 | 4.60E-02 | 9.71E-01 | 1.00E+00 |
| 8125713 | NM_172208    | TAPBP    | TAP binding protein (tapasin)                                                     | L359V only | 1.10 | 1.24 | 1.02 | 1.03 | 4.04E-01 | 3.58E-02 | 9.73E-01 | 1.00E+00 |
| 8009164 | NM_005828    | WDR68    | WD repeat domain 68                                                               | L359V only | 1.11 | 1.23 | 1.03 | 1.04 | 3.65E-01 | 3.77E-02 | 9.43E-01 | 1.00E+00 |
| 8048304 | NM_021198    | CTDSP1   | CTD (carboxy-terminal domain, RNA polymerase II, polypeptide A) small phosphatase | L359V only | 1.10 | 1.23 | 1.03 | 1.03 | 4.23E-01 | 4.96E-02 | 9.54E-01 | 1.00E+00 |
| 8129706 | NM_006620    | HBS1L    | HBS1-like (S. cerevisiae)                                                         | L359V only | 1.07 | 1.23 | 1.03 | 1.08 | 5.93E-01 | 4.02E-02 | 9.56E-01 | 1.00E+00 |
| 8179564 | NM_002263    | KIFC1    | kinesin family member C1                                                          | L359V only | 1.14 | 1.22 | 0.98 | 1.06 | 2.30E-01 | 4.64E-02 | 9.74E-01 | 1.00E+00 |
| 7952145 | NM_006389    | HYOU1    | hypoxia up-regulated 1                                                            | L359V only | 0.93 | 0.83 | 0.98 | 0.91 | 5.03E-01 | 4.84E-02 | 9.73E-01 | 9.88E-01 |
| 8145691 | NM_005671    | UBXN8    | UBX domain protein 8                                                              | L359V only | 0.92 | 0.82 | 0.86 | 0.93 | 4.93E-01 | 4.61E-02 | 5.99E-01 | 1.00E+00 |
| 7959070 | NM_002567    | PEBP1    | phosphatidylethanolamine binding protein 1                                        | L359V only | 0.83 | 0.82 | 0.96 | 0.94 | 7.60E-02 | 4.23E-02 | 9.30E-01 | 1.00E+00 |
| 8156718 | NM_002486    | NCBP1    | nuclear cap binding protein subunit 1, 80kDa                                      | L359V only | 0.89 | 0.81 | 0.92 | 0.93 | 2.76E-01 | 3.85E-02 | 8.38E-01 | 1.00E+00 |
| 8167797 | NM_019067    | GNL3L    | guanine nucleotide binding protein-like 3 (nucleolar)-like                        | L359V only | 0.81 | 0.81 | 0.90 | 0.92 | 5.21E-02 | 4.71E-02 | 8.02E-01 | 1.00E+00 |
| 7940781 | NM_201428    | RTN3     | reticulon 3                                                                       | L359V only | 0.92 | 0.81 | 0.87 | 0.89 | 5.13E-01 | 4.85E-02 | 7.01E-01 | 8.12E-01 |
| 8128111 | NM_016021    | UBE2J1   | ubiquitin-conjugating enzyme E2, J1 (UBC6 homolog, yeast)                         | L359V only | 0.88 | 0.81 | 0.92 | 0.92 | 2.80E-01 | 4.77E-02 | 8.52E-01 | 1.00E+00 |
| 8125941 | NM_003137    | SRPK1    | SFRS protein kinase 1                                                             | L359V only | 0.86 | 0.81 | 0.93 | 0.93 | 1.61E-01 | 4.31E-02 | 8.75E-01 | 1.00E+00 |
| 7971513 | NM_001984    | ESD      | esterase D                                                                        | L359V only | 0.99 | 0.81 | 0.97 | 0.99 | 9.36E-01 | 3.88E-02 | 9.41E-01 | 1.00E+00 |
| 7962427 | NM_031292    | PUS7L    | pseudouridylate synthase 7 homolog (S. cerevisiae)-like                           | L359V only | 0.88 | 0.81 | 0.84 | 0.89 | 2.84E-01 | 4.16E-02 | 4.74E-01 | 8.60E-01 |
| 8105229 | NM_015946    | PELO     | pelota homolog (Drosophila)                                                       | L359V only | 0.86 | 0.81 | 0.92 | 0.88 | 1.99E-01 | 4.64E-02 | 8.53E-01 | 7.60E-01 |
| 8127824 | NM_198920    | UBE2CBP  | ubiquitin-conjugating enzyme E2C binding protein                                  | L359V only | 0.96 | 0.81 | 0.93 | 0.94 | 7.98E-01 | 4.31E-02 | 8.76E-01 | 1.00E+00 |
| 8113689 | ---          | ---      | ---                                                                               | L359V only | 0.90 | 0.81 | 0.91 | 0.92 | 3.77E-01 | 4.58E-02 | 8.31E-01 | 1.00E+00 |
| 8046086 | NM_203463    | LASS6    | LAG1 homolog, ceramide synthase 6                                                 | L359V only | 0.81 | 0.81 | 0.87 | 0.90 | 6.67E-02 | 4.69E-02 | 7.38E-01 | 9.45E-01 |
| 8006123 | NM_001304    | CPD      | carboxypeptidase D                                                                | L359V only | 0.80 | 0.81 | 0.89 | 0.89 | 5.87E-02 | 4.57E-02 | 8.01E-01 | 8.78E-01 |
| 8071332 | NM_002882    | RANBP1   | RAN binding protein 1                                                             | L359V only | 0.83 | 0.80 | 0.92 | 0.91 | 1.00E-01 | 3.98E-02 | 8.38E-01 | 1.00E+00 |
| 8004497 | NM_001416    | EIF4A1   | eukaryotic translation initiation factor 4A, isoform 1                            | L359V only | 0.92 | 0.80 | 0.96 | 0.96 | 5.38E-01 | 3.80E-02 | 9.16E-01 | 1.00E+00 |
| 8059689 | NM_005381    | NCL      | nucleolin                                                                         | L359V only | 0.89 | 0.80 | 0.95 | 0.95 | 2.92E-01 | 3.77E-02 | 9.01E-01 | 1.00E+00 |
| 7899134 | NM_022778    | CCDC21   | coiled-coil domain containing 21                                                  | L359V only | 0.90 | 0.80 | 0.94 | 0.93 | 4.01E-01 | 4.07E-02 | 8.92E-01 | 1.00E+00 |
| 7983350 | NM_003758    | EIF3J    | eukaryotic translation initiation factor 3, subunit J                             | L359V only | 0.89 | 0.80 | 0.91 | 0.91 | 3.10E-01 | 4.13E-02 | 8.36E-01 | 1.00E+00 |
| 8164665 | NM_005312    | RAPGEF1  | Rap guanine nucleotide exchange factor (GEF) 1                                    | L359V only | 0.82 | 0.80 | 0.87 | 0.87 | 7.57E-02 | 3.93E-02 | 6.89E-01 | 6.27E-01 |
| 7989013 | NM_016304    | C15orf15 | chromosome 15 open reading frame 15                                               | L359V only | 1.02 | 0.80 | 1.02 | 1.04 | 9.14E-01 | 4.84E-02 | 9.81E-01 | 1.00E+00 |
| 7985268 | NM_000137    | FAH      | fumarylacetoacetate hydrolase (fumarylacetoacetase)                               | L359V only | 0.84 | 0.80 | 0.85 | 0.88 | 1.18E-01 | 3.64E-02 | 6.04E-01 | 7.02E-01 |
| 8105191 | NM_024615    | PARP8    | poly (ADP-ribose) polymerase family, member 8                                     | L359V only | 0.85 | 0.80 | 0.92 | 0.93 | 1.12E-01 | 2.45E-02 | 8.36E-01 | 1.00E+00 |
| 7975521 | NM_021239    | RBM25    | RNA binding motif protein 25                                                      | L359V only | 1.05 | 0.80 | 0.94 | 0.99 | 7.54E-01 | 3.20E-02 | 8.89E-01 | 1.00E+00 |
| 8019250 | NM_000918    | P4HB     | prolyl 4-hydroxylase, beta polypeptide                                            | L359V only | 0.89 | 0.80 | 0.95 | 0.92 | 2.96E-01 | 2.64E-02 | 8.91E-01 | 1.00E+00 |
| 8098328 | NM_017423    | GALNT7   | UDP-N-acetyl-alpha-D-galactosamine:polypeptide N-acetyl-galactosaminyltransferase | L359V only | 0.89 | 0.80 | 0.89 | 0.89 | 3.54E-01 | 4.69E-02 | 8.13E-01 | 8.90E-01 |
| 8084951 | NM_198565    | LRR33    | leucine rich repeat containing 33                                                 | L359V only | 0.86 | 0.80 | 0.91 | 0.86 | 2.07E-01 | 4.10E-02 | 8.38E-01 | 6.04E-01 |
| 8119993 | NM_007355    | HSP90AB1 | heat shock protein 90kDa alpha (cytosolic), class B member 1                      | L359V only | 0.85 | 0.80 | 0.90 | 0.91 | 1.44E-01 | 2.83E-02 | 8.13E-01 | 9.45E-01 |
| 7989023 | NM_004580    | RAB27A   | RAB27A, member RAS oncogene family                                                | L359V only | 0.91 | 0.80 | 0.98 | 0.98 | 4.60E-01 | 3.97E-02 | 9.65E-01 | 1.00E+00 |
| 7935462 | NM_016046    | EXOSC1   | exosome component 1                                                               | L359V only | 0.92 | 0.80 | 0.93 | 0.94 | 5.85E-01 | 4.61E-02 | 8.76E-01 | 1.00E+00 |
| 8046848 | NM_018471    | ZC3H15   | zinc finger CCCH-type containing 15                                               | L359V only | 0.87 | 0.80 | 0.93 | 0.96 | 1.95E-01 | 2.88E-02 | 8.64E-01 | 1.00E+00 |
| 8171747 | NM_001412    | EIF1AX   | eukaryotic translation initiation factor 1A, X-linked                             | L359V only | 0.89 | 0.80 | 0.94 | 0.92 | 2.69E-01 | 2.24E-02 | 8.70E-01 | 1.00E+00 |
| 8050695 | NM_016047    | SF3B14   | splicing factor 3B, 14 kDa subunit                                                | L359V only | 0.95 | 0.80 | 0.97 | 0.94 | 6.86E-01 | 2.19E-02 | 9.40E-01 | 1.00E+00 |
| 8147483 | NM_178812    | MTDH     | metadherin                                                                        | L359V only | 0.93 | 0.80 | 0.92 | 0.95 | 5.78E-01 | 3.72E-02 | 8.64E-01 | 1.00E+00 |
| 8094070 | BC035655     | C4orf23  | chromosome 4 open reading frame 23                                                | L359V only | 0.86 | 0.79 | 0.90 | 0.89 | 2.28E-01 | 4.28E-02 | 8.25E-01 | 8.78E-01 |
| 8104760 | NM_152295    | TARS     | threonyl-tRNA synthetase                                                          | L359V only | 0.92 | 0.79 | 1.03 | 1.00 | 5.23E-01 | 4.03E-02 | 9.59E-01 | 1.00E+00 |
| 7924823 | NM_023007    | JMJD4    | jumonji domain containing 4                                                       | L359V only | 0.86 | 0.79 | 0.93 | 0.88 | 2.24E-01 | 4.34E-02 | 8.79E-01 | 8.36E-01 |
| 7916282 | NM_004631    | LRP8     | low density lipoprotein receptor-related protein 8, apolipoprotein E receptor     | L359V only | 0.80 | 0.79 | 0.90 | 0.87 | 6.80E-02 | 4.62E-02 | 8.36E-01 | 7.02E-01 |
| 8079140 | NM_017719    | SNRK     | SNF related kinase                                                                | L359V only | 0.93 | 0.79 | 0.91 | 0.94 | 6.59E-01 | 4.65E-02 | 8.41E-01 | 1.00E+00 |
| 8149673 | NM_025232    | REEP4    | receptor accessory protein 4                                                      | L359V only | 0.88 | 0.79 | 0.96 | 0.91 | 3.10E-01 | 4.31E-02 | 9.31E-01 | 1.00E+00 |
| 8026541 | AF151902     | FAM32A   | family with sequence similarity 32, member A                                      | L359V only | 0.87 | 0.79 | 0.89 | 0.91 | 2.75E-01 | 4.44E-02 | 8.14E-01 | 1.00E+00 |
| 8151074 | NM_002603    | PDE7A    | phosphodiesterase 7A                                                              | L359V only | 1.09 | 0.79 | 0.98 | 0.98 | 5.43E-01 | 3.84E-02 | 9.76E-01 | 1.00E+00 |
| 7914750 | BC034598     | C1orf212 | chromosome 1 open reading frame 212                                               | L359V only | 0.91 | 0.79 | 0.90 | 0.91 | 4.72E-01 | 3.46E-02 | 8.20E-01 | 1.00E+00 |
| 7983206 | NM_014444    | TUBGCP4  | tubulin, gamma complex associated protein 4                                       | L359V only | 0.84 | 0.79 | 0.90 | 0.90 | 1.05E-01 | 2.57E-02 | 8.01E-01 | 8.65E-01 |
| 8128650 | NM_007214    | SEC63    | SEC63 homolog (S. cerevisiae)                                                     | L359V only | 0.90 | 0.79 | 0.94 | 0.96 | 3.98E-01 | 3.76E-02 | 8.93E-01 | 1.00E+00 |
| 7912670 | NM_006004    | UQCRH    | ubiquinol-cytochrome c reductase hinge protein                                    | L359V only | 1.03 | 0.79 | 1.00 | 1.01 | 8.67E-01 | 3.56E-02 | 9.99E-01 | 1.00E+00 |
| 8052562 | NM_006430    | CCT4     | chaperonin containing TCP1, subunit 4 (delta)                                     | L359V only | 0.89 | 0.79 | 0.95 | 0.93 | 2.95E-01 | 2.69E-02 | 8.93E-01 | 1.00E+00 |
| 7912198 | NM_001428    | ENO1     | enolase 1, (alpha)                                                                | L359V only | 0.81 | 0.79 | 0.92 | 0.88 | 8.84E-02 | 4.11E-02 | 8.64E-01 | 8.77E-01 |
| 8118661 | NM_014260    | PFDN6    | prefoldin subunit 6                                                               | L359V only | 0.85 | 0.79 | 0.93 | 0.89 | 2.11E-01 | 4.61E-02 | 8.77E-01 | 9.45E-01 |
| 8178270 | NM_014260    | PFDN6    | prefoldin subunit 6                                                               | L359V only | 0.85 | 0.79 | 0.93 | 0.89 | 2.11E-01 | 4.61E-02 | 8.77E-01 | 9.45E-01 |
| 8179559 | NM_014260    | PFDN6    | prefoldin subunit 6                                                               | L359V only | 0.85 | 0.79 | 0.93 | 0.89 | 2.11E-01 | 4.61E-02 | 8.77E-01 | 9.45E-01 |

|         |              |           |                                                                                  |            |      |      |      |      |          |          |          |          |
|---------|--------------|-----------|----------------------------------------------------------------------------------|------------|------|------|------|------|----------|----------|----------|----------|
| 8045946 | NM_005805    | PSMD14    | proteasome (prosome, macropain) 26S subunit, non-ATPase, 14                      | L359V only | 0.89 | 0.79 | 0.94 | 0.92 | 3.67E-01 | 4.12E-02 | 8.97E-01 | 1.00E+00 |
| 8046975 | NM_032168    | WDR75     | WD repeat domain 75                                                              | L359V only | 1.02 | 0.79 | 1.01 | 1.00 | 9.22E-01 | 2.91E-02 | 9.85E-01 | 1.00E+00 |
| 8089128 | NM_014820    | TOMM70A   | translocase of outer mitochondrial membrane 70 homolog A (S. cerevisiae)         | L359V only | 0.94 | 0.79 | 0.99 | 0.98 | 6.83E-01 | 3.14E-02 | 9.94E-01 | 1.00E+00 |
| 8134079 | NM_033107    | GTPBP10   | GTP-binding protein 10 (putative)                                                | L359V only | 0.88 | 0.79 | 0.92 | 0.95 | 3.46E-01 | 4.38E-02 | 8.59E-01 | 1.00E+00 |
| 7950142 | NM_030813    | CLPB      | ClpB caseinolytic peptidase B homolog (E. coli)                                  | L359V only | 0.86 | 0.79 | 0.95 | 0.89 | 2.21E-01 | 3.84E-02 | 9.09E-01 | 8.90E-01 |
| 7927536 | NM_005437    | NCOA4     | nuclear receptor coactivator 4                                                   | L359V only | 1.17 | 0.79 | 1.19 | 1.07 | 1.51E-01 | 2.48E-02 | 4.87E-01 | 1.00E+00 |
| 8177635 | NM_003187    | TAF9      | TAF9 RNA polymerase II, TATA box binding protein (TBP)-associated factor, 32kDa  | L359V only | 0.88 | 0.79 | 0.96 | 0.93 | 3.08E-01 | 4.13E-02 | 9.45E-01 | 1.00E+00 |
| 7919226 | NM_006468    | POLR3C    | polymerase (RNA) III (DNA directed) polypeptide C (62kD)                         | L359V only | 0.86 | 0.79 | 0.90 | 0.93 | 2.07E-01 | 2.85E-02 | 8.19E-01 | 1.00E+00 |
| 8130567 | NM_030752    | TCP1      | t-complex 1                                                                      | L359V only | 0.84 | 0.79 | 0.88 | 0.89 | 1.39E-01 | 3.63E-02 | 8.01E-01 | 8.90E-01 |
| 7927964 | NM_002727    | SRGN      | serglycin                                                                        | L359V only | 0.94 | 0.79 | 1.07 | 0.95 | 7.04E-01 | 3.53E-02 | 8.80E-01 | 1.00E+00 |
| 7908022 | NM_001357    | DHX9      | DEAH (Asp-Glu-Ala-His) box polypeptide 9                                         | L359V only | 0.93 | 0.79 | 0.90 | 0.90 | 5.86E-01 | 3.01E-02 | 8.23E-01 | 9.84E-01 |
| 8015460 | NM_001096    | ACLY      | ATP citrate lyase                                                                | L359V only | 0.88 | 0.79 | 0.99 | 0.89 | 3.06E-01 | 3.28E-02 | 9.87E-01 | 9.11E-01 |
| 8158930 | NM_018956    | C9orf9    | chromosome 9 open reading frame 9                                                | L359V only | 0.82 | 0.79 | 0.96 | 0.89 | 1.22E-01 | 4.24E-02 | 9.41E-01 | 9.41E-01 |
| 8070194 | NM_001001890 | RUNX1     | runt-related transcription factor 1                                              | L359V only | 1.04 | 0.79 | 1.02 | 0.92 | 8.03E-01 | 3.84E-02 | 9.75E-01 | 1.00E+00 |
| 7899462 | NM_001048194 | RCC1      | regulator of chromosome condensation 1                                           | L359V only | 0.84 | 0.79 | 1.00 | 0.94 | 1.64E-01 | 4.33E-02 | 9.95E-01 | 1.00E+00 |
| 7933582 | NM_006327    | TIMM23    | translocase of inner mitochondrial membrane 23 homolog (yeast)                   | L359V only | 0.83 | 0.79 | 0.90 | 0.89 | 1.33E-01 | 3.84E-02 | 8.23E-01 | 9.35E-01 |
| 7977105 | NM_152307    | TRMT61A   | tRNA methyltransferase 61 homolog A (S. cerevisiae)                              | L359V only | 0.79 | 0.79 | 0.95 | 0.87 | 6.51E-02 | 4.71E-02 | 9.22E-01 | 8.38E-01 |
| 8048980 | NM_016289    | CAB39     | calcium binding protein 39                                                       | L359V only | 0.97 | 0.78 | 0.99 | 0.98 | 8.61E-01 | 2.30E-02 | 9.86E-01 | 1.00E+00 |
| 7936578 | NM_022063    | C10orf84  | chromosome 10 open reading frame 84                                              | L359V only | 0.87 | 0.78 | 0.92 | 0.96 | 2.61E-01 | 3.00E-02 | 8.64E-01 | 1.00E+00 |
| 8134415 | NM_020186    | ACN9      | ACN9 homolog (S. cerevisiae)                                                     | L359V only | 0.91 | 0.78 | 0.94 | 0.94 | 4.91E-01 | 2.74E-02 | 8.94E-01 | 1.00E+00 |
| 7975416 | NM_014982    | PCNX      | pecanex homolog (Drosophila)                                                     | L359V only | 0.94 | 0.78 | 0.91 | 0.93 | 6.28E-01 | 2.13E-02 | 8.36E-01 | 1.00E+00 |
| 7962203 | NM_001040436 | YARS2     | tyrosyl-tRNA synthetase 2, mitochondrial                                         | L359V only | 0.99 | 0.78 | 0.97 | 0.99 | 9.64E-01 | 3.35E-02 | 9.59E-01 | 1.00E+00 |
| 7989596 | NM_014326    | DAPK2     | death-associated protein kinase 2                                                | L359V only | 1.10 | 0.78 | 1.04 | 0.98 | 4.77E-01 | 3.22E-02 | 9.31E-01 | 1.00E+00 |
| 8061542 | NM_178580    | HM13      | histocompatibility (minor) 13                                                    | L359V only | 0.79 | 0.78 | 0.85 | 0.85 | 8.00E-02 | 4.96E-02 | 7.14E-01 | 6.66E-01 |
| 8105612 | NM_005869    | SDCCAG10  | serologically defined colon cancer antigen 10                                    | L359V only | 0.91 | 0.78 | 0.86 | 0.94 | 5.28E-01 | 4.13E-02 | 7.28E-01 | 1.00E+00 |
| 7970989 | BC037403     | SOHLH2    | spermatogenesis and oogenesis specific basic helix-loop-helix 2                  | L359V only | 0.95 | 0.78 | 1.03 | 1.02 | 7.63E-01 | 4.69E-02 | 9.62E-01 | 1.00E+00 |
| 8083826 | NM_003262    | SEC62     | SEC62 homolog (S. cerevisiae)                                                    | L359V only | 0.93 | 0.78 | 0.93 | 0.95 | 6.25E-01 | 2.94E-02 | 8.76E-01 | 1.00E+00 |
| 8060484 | NM_006392    | NOP56     | NOP56 ribonucleoprotein homolog (yeast)                                          | L359V only | 0.83 | 0.78 | 0.88 | 0.91 | 1.02E-01 | 2.79E-02 | 7.79E-01 | 1.00E+00 |
| 8121300 | NM_018292    | QRSL1     | glutaminyl-tRNA synthase (glutamine-hydrolyzing)-like 1                          | L359V only | 0.82 | 0.78 | 0.90 | 0.92 | 1.25E-01 | 4.67E-02 | 8.38E-01 | 1.00E+00 |
| 8155327 | NM_000692    | ALDH1B1   | aldehyde dehydrogenase 1 family, member B1                                       | L359V only | 0.78 | 0.78 | 0.93 | 0.86 | 5.87E-02 | 4.70E-02 | 8.80E-01 | 7.09E-01 |
| 8069998 | AF282851     | C21orf59  | chromosome 21 open reading frame 59                                              | L359V only | 0.87 | 0.78 | 0.91 | 0.93 | 3.25E-01 | 4.65E-02 | 8.58E-01 | 1.00E+00 |
| 7954631 | NM_018099    | FAR2      | fatty acyl CoA reductase 2                                                       | L359V only | 0.85 | 0.78 | 0.91 | 0.92 | 2.35E-01 | 4.65E-02 | 8.62E-01 | 1.00E+00 |
| 8159111 | NM_017588    | WDR5      | WD repeat domain 5                                                               | L359V only | 0.87 | 0.78 | 0.91 | 0.89 | 2.48E-01 | 2.91E-02 | 8.38E-01 | 8.97E-01 |
| 8096718 | NM_004757    | SCYE1     | small inducible cytokine subfamily E, member 1 (endothelial monocyte-activating) | L359V only | 0.93 | 0.78 | 0.93 | 0.93 | 6.12E-01 | 3.53E-02 | 8.85E-01 | 1.00E+00 |
| 8060599 | NM_030811    | MRPS26    | mitochondrial ribosomal protein S26                                              | L359V only | 0.79 | 0.78 | 0.94 | 0.92 | 5.15E-02 | 3.20E-02 | 8.88E-01 | 1.00E+00 |
| 7925978 | NM_017782    | C10orf18  | chromosome 10 open reading frame 18                                              | L359V only | 0.79 | 0.78 | 0.90 | 0.88 | 8.00E-02 | 4.86E-02 | 8.38E-01 | 8.86E-01 |
| 8047518 | NM_015934    | NOP5      | NOP58                                                                            | L359V only | 0.89 | 0.78 | 0.90 | 0.92 | 3.80E-01 | 3.72E-02 | 8.25E-01 | 1.00E+00 |
| 7923007 | NM_015984    | UCHL5     | ubiquitin carboxyl-terminal hydrolase L5                                         | L359V only | 0.91 | 0.78 | 0.96 | 0.96 | 4.58E-01 | 2.41E-02 | 9.28E-01 | 1.00E+00 |
| 7956785 | NM_007235    | XPOT      | exportin, tRNA (nuclear export receptor for tRNAs)                               | L359V only | 1.00 | 0.78 | 1.03 | 1.01 | 9.86E-01 | 2.00E-02 | 9.52E-01 | 1.00E+00 |
| 7997520 | NM_001537    | HSBP1     | heat shock factor binding protein 1                                              | L359V only | 0.91 | 0.78 | 0.91 | 0.93 | 4.69E-01 | 3.37E-02 | 8.41E-01 | 1.00E+00 |
| 8135568 | NM_199072    | MDFIC     | MyoD family inhibitor domain containing                                          | L359V only | 0.85 | 0.78 | 1.01 | 0.93 | 1.93E-01 | 3.76E-02 | 9.90E-01 | 1.00E+00 |
| 8113542 | NM_005669    | REEP5     | receptor accessory protein 5                                                     | L359V only | 0.85 | 0.78 | 0.87 | 0.88 | 1.79E-01 | 3.26E-02 | 7.65E-01 | 8.22E-01 |
| 7938777 | NM_005566    | LDHA      | lactate dehydrogenase A                                                          | L359V only | 0.83 | 0.78 | 0.98 | 0.90 | 1.10E-01 | 2.50E-02 | 9.72E-01 | 9.81E-01 |
| 7915995 | NM_007051    | FAF1      | Fas (TNFRSF6) associated factor 1                                                | L359V only | 0.91 | 0.78 | 0.90 | 0.93 | 5.35E-01 | 4.59E-02 | 8.41E-01 | 1.00E+00 |
| 7896961 | NM_031921    | ATAD3B    | ATPase family, AAA domain containing 3B                                          | L359V only | 0.77 | 0.78 | 0.90 | 0.86 | 5.13E-02 | 4.65E-02 | 8.41E-01 | 7.82E-01 |
| 8125091 | NM_006295    | VARS      | valyl-tRNA synthetase                                                            | L359V only | 0.85 | 0.78 | 0.99 | 0.87 | 2.03E-01 | 3.16E-02 | 9.85E-01 | 7.47E-01 |
| 8178609 | NM_006295    | VARS      | valyl-tRNA synthetase                                                            | L359V only | 0.85 | 0.78 | 0.99 | 0.87 | 2.03E-01 | 3.16E-02 | 9.85E-01 | 7.47E-01 |
| 8030908 | NM_144684    | ZNF480    | zinc finger protein 480                                                          | L359V only | 0.84 | 0.78 | 0.90 | 0.87 | 1.12E-01 | 1.92E-02 | 8.09E-01 | 6.07E-01 |
| 7991587 | NM_203472    | SELS      | selenoprotein S                                                                  | L359V only | 0.97 | 0.78 | 0.92 | 0.89 | 8.51E-01 | 2.46E-02 | 8.55E-01 | 8.36E-01 |
| 8076586 | NM_173050    | SCUBE1    | signal peptide, CUB domain, EGF-like 1                                           | L359V only | 1.14 | 0.78 | 1.25 | 0.98 | 3.09E-01 | 3.71E-02 | 3.90E-01 | 1.00E+00 |
| 8019807 | NM_005151    | USP14     | ubiquitin specific peptidase 14 (tRNA-guanine transglycosylase)                  | L359V only | 0.91 | 0.78 | 0.88 | 0.90 | 5.05E-01 | 4.19E-02 | 8.09E-01 | 1.00E+00 |
| 8016708 | NM_018509    | LRRC59    | leucine rich repeat containing 59                                                | L359V only | 0.89 | 0.78 | 0.93 | 0.90 | 4.11E-01 | 4.85E-02 | 8.85E-01 | 1.00E+00 |
| 7902883 | NM_001134479 | LRRC8D    | leucine rich repeat containing 8 family, member D                                | L359V only | 0.79 | 0.78 | 0.89 | 0.93 | 5.76E-02 | 3.16E-02 | 8.13E-01 | 1.00E+00 |
| 7972810 | NM_024537    | CARS2     | cysteinyl-tRNA synthetase 2, mitochondrial (putative)                            | L359V only | 0.84 | 0.78 | 0.88 | 0.94 | 9.87E-02 | 1.73E-02 | 7.50E-01 | 1.00E+00 |
| 7928630 | NM_001099692 | EIF5A11   | eukaryotic translation initiation factor 5A-like 1                               | L359V only | 0.93 | 0.78 | 0.97 | 0.92 | 6.55E-01 | 4.64E-02 | 9.54E-01 | 1.00E+00 |
| 8048120 | NM_004044    | ATIC      | 5-aminoimidazole-4-carboxamide ribonucleotide formyltransferase                  | L359V only | 0.80 | 0.78 | 0.95 | 0.92 | 5.88E-02 | 2.41E-02 | 9.04E-01 | 1.00E+00 |
| 8038954 | NM_178523    | ZNF616    | zinc finger protein 616                                                          | L359V only | 0.95 | 0.78 | 0.86 | 0.92 | 7.40E-01 | 3.32E-02 | 7.38E-01 | 1.00E+00 |
| 8135514 | NM_001550    | IFRD1     | interferon-related developmental regulator 1                                     | L359V only | 0.95 | 0.78 | 0.93 | 0.98 | 7.47E-01 | 3.70E-02 | 8.76E-01 | 1.00E+00 |
| 7981481 | NM_004894    | C14orf2   | chromosome 14 open reading frame 2                                               | L359V only | 0.96 | 0.78 | 0.94 | 0.93 | 7.96E-01 | 3.15E-02 | 8.96E-01 | 1.00E+00 |
| 8056977 | NM_006164    | NFE2L2    | nuclear factor (erythroid-derived 2)-like 2                                      | L359V only | 0.98 | 0.78 | 1.00 | 0.97 | 9.24E-01 | 2.30E-02 | 9.98E-01 | 1.00E+00 |
| 8016832 | NM_012329    | MMD       | monocyte to macrophage differentiation-associated                                | L359V only | 0.85 | 0.78 | 0.96 | 0.91 | 2.59E-01 | 4.95E-02 | 9.36E-01 | 1.00E+00 |
| 7974352 | NM_016039    | C14orf166 | chromosome 14 open reading frame 166                                             | L359V only | 0.98 | 0.78 | 0.95 | 0.94 | 9.07E-01 | 4.07E-02 | 9.30E-01 | 1.00E+00 |
| 8009685 | NM_004252    | SLC9A3R1  | solute carrier family 9 (sodium)                                                 | L359V only | 0.79 | 0.78 | 0.84 | 0.82 | 5.18E-02 | 2.88E-02 | 5.58E-01 | 3.28E-01 |
| 7964250 | NM_006601    | PTGES3    | prostaglandin I synthase 3 (cytosolic)                                           | L359V only | 0.92 | 0.78 | 0.94 | 0.97 | 5.89E-01 | 3.53E-02 | 8.88E-01 | 1.00E+00 |
| 8132943 | NM_001762    | CCT6A     | chaperonin containing TCP1, subunit 6A (zeta 1)                                  | L359V only | 0.87 | 0.78 | 0.90 | 0.89 | 3.08E-01 | 4.62E-02 | 8.43E-01 | 1.00E+00 |

|         |              |             |                                                                |
|---------|--------------|-------------|----------------------------------------------------------------|
| 8007757 | NM_005892    | FMNL1       | formin-like 1                                                  |
| 7958749 | NM_005475    | SH2B3       | SH2B adaptor protein 3                                         |
| 8141898 | NM_014377    | DNAJC2      | DnaJ (Hsp40) homolog, subfamily C, member 2                    |
| 8166335 | NM_000284    | PDHA1       | pyruvate dehydrogenase (lipoamide) alpha 1                     |
| 7936242 | NM_033397    | ITPRIP      | inositol 1,4,5-triphosphate receptor interacting protein       |
| 8117194 | NM_020662    | MRS2        | MRS2 magnesium homeostasis factor homolog (S. cerevisiae)      |
| 7979196 | NM_198066    | GNPNAT1     | glucosamine-phosphate N-acetyltransferase 1                    |
| 8066247 | NR_015366    | LOC388796   | hypothetical LOC388796                                         |
| 7911559 | NM_017971    | MRPL20      | mitochondrial ribosomal protein L20                            |
| 8039939 | NM_017971    | MRPL20      | mitochondrial ribosomal protein L20                            |
| 7917331 | NR_024113    | C1orf52     | chromosome 1 open reading frame 52                             |
| 8137584 | NM_138400    | NOM1        | nucleolar protein with MIF4G domain 1                          |
| 7915091 | NM_005955    | MTF1        | metal-regulatory transcription factor 1                        |
| 8023708 | ---          |             |                                                                |
| 8085531 | NM_022497    | MRPS25      | mitochondrial ribosomal protein S25                            |
| 8046333 | NM_024843    | CYBRD1      | cytochrome b reductase 1                                       |
| 7930870 | CR456475     | TOMM22      | translocase of outer mitochondrial membrane 22 homolog (yeast) |
| 8150908 | NM_017813    | IMPAD1      | inositol monophosphatase domain containing 1                   |
| 7956443 | NM_004990    | MARS        | methionyl-tRNA synthetase                                      |
| 8051528 | NM_005760    | CEBPZ       | CCAAT                                                          |
| 8144557 | NM_012331    | MSRA        | methionine sulfoxide reductase A                               |
| 8047243 | NM_138395    | MARS2       | methionyl-tRNA synthetase 2, mitochondrial                     |
| 8162850 | NM_017746    | TEX10       | testis expressed 10                                            |
| 8114861 | NM_020117    | LARS        | leucyl-tRNA synthetase                                         |
| 7914563 | NM_003680    | YARS        | tyrosyl-tRNA synthetase                                        |
| 8138489 | NM_018719    | CDCA7L      | cell division cycle associated 7-like                          |
| 8017421 | NM_020198    | CCDC47      | coiled-coil domain containing 47                               |
| 8148293 | NM_173685    | NSMCE2      | non-SMC element 2, MMS21 homolog (S. cerevisiae)               |
| 7971967 | NM_014953    | DIS3        | DIS3 mitotic control homolog (S. cerevisiae)                   |
| 7982753 | NM_152260    | RPUSD2      | RNA pseudouridylate synthase domain containing 2               |
| 7950473 | NM_004041    | ARRB1       | arrestin, beta 1                                               |
| 8072488 | NM_004147    | DRG1        | developmentally regulated GTP binding protein 1                |
| 7968670 | NM_016617    | UFM1        | ubiquitin-fold modifier 1                                      |
| 7934753 | NM_001099692 | EIF5A1      | eukaryotic translation initiation factor 5A-like 1             |
| 8097543 | NM_014487    | ZNF330      | zinc finger protein 330                                        |
| 8175755 | NM_004344    | CETN2       | centrin, EF-hand protein, 2                                    |
| 8112728 | NM_001089704 | hCG_1757335 | hCG1757335                                                     |
| 8022393 | NM_002828    | PTPN2       | protein tyrosine phosphatase, non-receptor type 2              |
| 8014487 | NM_198839    | ACACA       | acetyl-Coenzyme A carboxylase alpha                            |
| 7958174 | NM_003330    | TXNRD1      | thioredoxin reductase 1                                        |
| 8035566 | NM_004838    | HOMER3      | homer homolog 3 (Drosophila)                                   |
| 7934278 | NM_000917    | P4HA1       | prolyl 4-hydroxylase, alpha polypeptide I                      |
| 7963054 | NM_006009    | TUBA1A      | tubulin, alpha 1a                                              |
| 8107814 | NM_016048    | ISOC1       | isochorismatase domain containing 1                            |
| 8071920 | NM_004175    | SNRPD3      | small nuclear ribonucleoprotein D3 polypeptide 18kDa           |
| 8089527 | NM_022488    | ATG3        | ATG3 autophagy related 3 homolog (S. cerevisiae)               |
| 8012581 | NM_004853    | STX8        | syntaxin 8                                                     |
| 7995843 | NM_014669    | NUP93       | nucleoporin 93kDa                                              |
| 7994280 | NM_000418    | IL4R        | interleukin 4 receptor                                         |
| 8003217 | NM_006067    | COX4NB      | COX4 neighbor                                                  |
| 7979516 | NM_020810    | TRMT5       | TRM5 tRNA methyltransferase 5 homolog (S. cerevisiae)          |
| 7912852 | BC110421     | EIF1AP1     | eukaryotic translation initiation factor 1A pseudogene 1       |
| 8110894 | NM_017755    | NSUN2       | NOL1                                                           |
| 8071649 | BX641141     | LOC96610    | hypothetical gene LOC96610                                     |
| 7954173 | NM_007178    | STRAP       | serine threonine kinase receptor associated protein            |
| 7958800 | NM_003668    | MAPKAPK5    | mitogen-activated protein kinase-activated protein kinase 5    |
| 8146448 | NM_014175    | MRPL15      | mitochondrial ribosomal protein L15                            |
| 7925229 | NM_152490    | B3GALNT2    | beta-1,3-N-acetylgalactosaminyltransferase 2                   |
| 7922051 | NM_003851    | CREG1       | cellular repressor of E1A-stimulated genes 1                   |
| 8073032 | NM_020243    | TOMM22      | translocase of outer mitochondrial membrane 22 homolog (yeast) |
| 8113504 | NM_004772    | C5orf13     | chromosome 5 open reading frame 13                             |
| 8018169 | NM_174892    | CD300LB     | CD300 molecule-like family member b                            |
| 8102162 | NM_020395    | INTS12      | integrator complex subunit 12                                  |
| 8056220 | NM_015446    | AHCTF1      | AT hook containing transcription factor 1                      |
| 8040618 | NM_016131    | RAB10       | RAB10, member RAS oncogene family                              |

|            |      |      |      |      |          |          |          |          |
|------------|------|------|------|------|----------|----------|----------|----------|
| L359V only | 0.77 | 0.78 | 0.90 | 0.87 | 5.88E-02 | 4.69E-02 | 8.38E-01 | 8.80E-01 |
| L359V only | 0.86 | 0.78 | 1.02 | 0.88 | 2.55E-01 | 3.60E-02 | 9.76E-01 | 8.84E-01 |
| L359V only | 0.95 | 0.78 | 0.91 | 0.94 | 7.83E-01 | 3.53E-02 | 8.38E-01 | 1.00E+00 |
| L359V only | 0.90 | 0.77 | 0.96 | 0.93 | 4.92E-01 | 4.75E-02 | 9.48E-01 | 1.00E+00 |
| L359V only | 0.83 | 0.77 | 0.94 | 0.89 | 1.47E-01 | 3.20E-02 | 8.99E-01 | 8.92E-01 |
| L359V only | 0.83 | 0.77 | 0.89 | 0.90 | 1.73E-01 | 4.48E-02 | 8.34E-01 | 1.00E+00 |
| L359V only | 0.86 | 0.77 | 0.98 | 0.91 | 2.63E-01 | 3.93E-02 | 9.72E-01 | 1.00E+00 |
| L359V only | 0.77 | 0.77 | 0.95 | 0.88 | 6.02E-02 | 4.64E-02 | 9.31E-01 | 8.92E-01 |
| L359V only | 0.83 | 0.77 | 0.92 | 0.89 | 9.71E-02 | 1.74E-02 | 8.41E-01 | 8.38E-01 |
| L359V only | 0.83 | 0.77 | 0.92 | 0.89 | 9.71E-02 | 1.74E-02 | 8.41E-01 | 8.38E-01 |
| L359V only | 0.83 | 0.77 | 0.84 | 0.85 | 1.50E-01 | 3.78E-02 | 6.39E-01 | 6.19E-01 |
| L359V only | 0.84 | 0.77 | 0.89 | 0.89 | 1.76E-01 | 3.78E-02 | 8.14E-01 | 9.72E-01 |
| L359V only | 0.83 | 0.77 | 0.85 | 0.82 | 1.53E-01 | 3.56E-02 | 7.12E-01 | 4.16E-01 |
| L359V only | 0.87 | 0.77 | 0.89 | 0.88 | 3.32E-01 | 4.62E-02 | 8.28E-01 | 9.06E-01 |
| L359V only | 0.83 | 0.77 | 0.99 | 0.93 | 1.91E-01 | 4.82E-02 | 9.84E-01 | 1.00E+00 |
| L359V only | 0.85 | 0.77 | 0.86 | 0.91 | 2.10E-01 | 2.92E-02 | 7.38E-01 | 1.00E+00 |
| L359V only | 0.88 | 0.77 | 0.93 | 0.90 | 3.04E-01 | 2.34E-02 | 8.77E-01 | 9.35E-01 |
| L359V only | 0.90 | 0.77 | 0.94 | 0.93 | 3.97E-01 | 2.47E-02 | 8.85E-01 | 1.00E+00 |
| L359V only | 0.89 | 0.77 | 1.07 | 0.99 | 3.79E-01 | 3.14E-02 | 8.89E-01 | 1.00E+00 |
| L359V only | 0.96 | 0.77 | 0.93 | 0.95 | 8.48E-01 | 4.96E-02 | 8.86E-01 | 1.00E+00 |
| L359V only | 0.82 | 0.77 | 0.83 | 0.85 | 1.10E-01 | 2.92E-02 | 5.48E-01 | 6.19E-01 |
| L359V only | 0.81 | 0.77 | 0.98 | 0.89 | 1.14E-01 | 3.70E-02 | 9.72E-01 | 1.00E+00 |
| L359V only | 0.86 | 0.77 | 0.92 | 0.93 | 2.78E-01 | 3.96E-02 | 8.77E-01 | 1.00E+00 |
| L359V only | 0.94 | 0.77 | 1.07 | 1.04 | 6.92E-01 | 2.67E-02 | 8.88E-01 | 1.00E+00 |
| L359V only | 0.98 | 0.77 | 1.01 | 0.99 | 8.96E-01 | 2.19E-02 | 9.81E-01 | 1.00E+00 |
| L359V only | 0.95 | 0.77 | 1.00 | 1.02 | 7.85E-01 | 3.84E-02 | 9.99E-01 | 1.00E+00 |
| L359V only | 0.90 | 0.77 | 0.92 | 0.94 | 4.00E-01 | 2.24E-02 | 8.47E-01 | 1.00E+00 |
| L359V only | 0.94 | 0.77 | 0.90 | 0.97 | 7.25E-01 | 3.16E-02 | 8.34E-01 | 1.00E+00 |
| L359V only | 0.98 | 0.77 | 0.96 | 0.94 | 9.13E-01 | 2.66E-02 | 9.29E-01 | 1.00E+00 |
| L359V only | 0.82 | 0.77 | 0.91 | 0.87 | 1.39E-01 | 4.11E-02 | 8.48E-01 | 8.36E-01 |
| L359V only | 0.94 | 0.77 | 0.98 | 0.95 | 7.10E-01 | 3.72E-02 | 9.80E-01 | 1.00E+00 |
| L359V only | 0.97 | 0.77 | 0.95 | 1.00 | 8.96E-01 | 2.97E-02 | 9.16E-01 | 1.00E+00 |
| L359V only | 0.83 | 0.77 | 0.91 | 0.92 | 1.37E-01 | 2.55E-02 | 8.38E-01 | 1.00E+00 |
| L359V only | 0.92 | 0.77 | 0.95 | 0.91 | 5.81E-01 | 3.38E-02 | 9.28E-01 | 1.00E+00 |
| L359V only | 0.82 | 0.77 | 0.80 | 0.87 | 1.39E-01 | 3.53E-02 | 4.12E-01 | 8.08E-01 |
| L359V only | 0.87 | 0.77 | 0.95 | 0.90 | 2.87E-01 | 2.63E-02 | 9.18E-01 | 1.00E+00 |
| L359V only | 0.94 | 0.77 | 0.95 | 0.95 | 7.27E-01 | 2.67E-02 | 9.11E-01 | 1.00E+00 |
| L359V only | 0.82 | 0.77 | 0.87 | 0.91 | 1.40E-01 | 3.45E-02 | 7.99E-01 | 1.00E+00 |
| L359V only | 0.85 | 0.77 | 0.89 | 0.88 | 2.50E-01 | 4.16E-02 | 8.36E-01 | 9.35E-01 |
| L359V only | 0.85 | 0.77 | 0.95 | 0.92 | 1.97E-01 | 2.37E-02 | 9.18E-01 | 1.00E+00 |
| L359V only | 1.79 | 0.77 | 1.00 | 0.93 | 1.04E-01 | 4.98E-02 | 9.99E-01 | 1.00E+00 |
| L359V only | 0.02 | 0.77 | 1.04 | 0.98 | 9.23E-01 | 4.26E-02 | 9.40E-01 | 1.00E+00 |
| L359V only | 0.85 | 0.77 | 0.91 | 0.88 | 1.78E-01 | 2.05E-02 | 8.36E-01 | 8.17E-01 |
| L359V only | 0.82 | 0.77 | 0.92 | 0.90 | 1.18E-01 | 2.52E-02 | 8.70E-01 | 9.96E-01 |
| L359V only | 0.86 | 0.77 | 0.90 | 0.91 | 2.42E-01 | 2.91E-02 | 8.25E-01 | 1.00E+00 |
| L359V only | 0.90 | 0.77 | 0.86 | 0.91 | 4.66E-01 | 3.22E-02 | 7.50E-01 | 1.00E+00 |
| L359V only | 0.82 | 0.77 | 0.87 | 0.90 | 1.20E-01 | 2.79E-02 | 7.84E-01 | 1.00E+00 |
| L359V only | 0.83 | 0.77 | 0.95 | 0.91 | 2.07E-01 | 4.96E-02 | 9.30E-01 | 1.00E+00 |
| L359V only | 0.94 | 0.77 | 0.97 | 0.90 | 6.91E-01 | 1.72E-02 | 9.43E-01 | 9.45E-01 |
| L359V only | 0.85 | 0.77 | 0.98 | 0.91 | 2.33E-01 | 3.37E-02 | 9.80E-01 | 1.00E+00 |
| L359V only | 0.78 | 0.77 | 0.83 | 0.87 | 5.55E-02 | 3.19E-02 | 6.08E-01 | 8.39E-01 |
| L359V only | 0.94 | 0.77 | 0.95 | 0.94 | 6.90E-01 | 2.17E-02 | 9.09E-01 | 1.00E+00 |
| L359V only | 0.84 | 0.77 | 0.94 | 0.92 | 1.60E-01 | 2.40E-02 | 9.01E-01 | 1.00E+00 |
| L359V only | 0.80 | 0.77 | 0.85 | 0.86 | 6.81E-02 | 2.62E-02 | 7.12E-01 | 6.68E-01 |
| L359V only | 0.86 | 0.76 | 0.95 | 0.91 | 2.52E-01 | 2.52E-02 | 9.13E-01 | 1.00E+00 |
| L359V only | 0.88 | 0.76 | 0.90 | 0.92 | 4.13E-01 | 4.84E-02 | 8.53E-01 | 1.00E+00 |
| L359V only | 0.84 | 0.76 | 0.92 | 0.93 | 1.85E-01 | 2.84E-02 | 8.76E-01 | 1.00E+00 |
| L359V only | 0.85 | 0.76 | 0.89 | 0.90 | 1.79E-01 | 2.33E-02 | 8.15E-01 | 9.92E-01 |
| L359V only | 0.97 | 0.76 | 1.07 | 0.98 | 8.61E-01 | 2.36E-02 | 8.88E-01 | 1.00E+00 |
| L359V only | 0.81 | 0.76 | 0.93 | 0.88 | 8.00E-02 | 2.30E-02 | 8.76E-01 | 8.38E-01 |
| L359V only | 0.95 | 0.76 | 0.93 | 0.94 | 7.48E-01 | 2.64E-02 | 8.86E-01 | 1.00E+00 |
| L359V only | 0.80 | 0.76 | 0.96 | 0.87 | 1.03E-01 | 4.02E-02 | 9.41E-01 | 8.78E-01 |
| L359V only | 0.93 | 0.76 | 0.98 | 0.94 | 6.95E-01 | 4.24E-02 | 9.83E-01 | 1.00E+00 |
| L359V only | 0.89 | 0.76 | 0.92 | 0.90 | 3.84E-01 | 2.71E-02 | 8.68E-01 | 1.00E+00 |
| L359V only | 0.91 | 0.76 | 0.93 | 0.94 | 4.10E-01 | 1.12E-02 | 8.69E-01 | 1.00E+00 |

|         |                 |           |                                                                                          |  |            |      |      |      |      |          |          |          |          |
|---------|-----------------|-----------|------------------------------------------------------------------------------------------|--|------------|------|------|------|------|----------|----------|----------|----------|
| 8009351 | ---             |           |                                                                                          |  | L359V only | 0.99 | 0.76 | 0.97 | 1.00 | 9.64E-01 | 3.60E-02 | 9.54E-01 | 1.00E+00 |
| 7904082 | XM_001716411    | LOC128322 | hypothetical LOC128322                                                                   |  | L359V only | 0.86 | 0.76 | 0.87 | 0.89 | 2.22E-01 | 2.30E-02 | 7.50E-01 | 9.43E-01 |
| 8127977 | NM_006372       | SYNCRIP   | synaptotagmin binding, cytoplasmic RNA interacting protein                               |  | L359V only | 0.81 | 0.76 | 0.88 | 0.89 | 1.19E-01 | 3.23E-02 | 8.13E-01 | 9.47E-01 |
| 8032484 | NM_012458       | TMM13     | translocase of inner mitochondrial membrane 13 homolog (yeast)                           |  | L359V only | 0.78 | 0.76 | 0.90 | 0.89 | 5.88E-02 | 2.66E-02 | 8.38E-01 | 9.65E-01 |
| 7906863 | NM_003115       | UAP1      | UDP-N-acteylglucosamine pyrophosphorylase 1                                              |  | L359V only | 0.83 | 0.76 | 0.95 | 0.92 | 1.71E-01 | 3.14E-02 | 9.22E-01 | 1.00E+00 |
| 8024898 | NM_018708       | FEM1A     | fem-1 homolog a (C. elegans)                                                             |  | L359V only | 0.79 | 0.76 | 0.89 | 0.85 | 6.89E-02 | 2.47E-02 | 8.20E-01 | 6.27E-01 |
| 8126058 | NM_016059       | PP1L1     | peptidylprolyl isomerase (cyclophilin)-like 1                                            |  | L359V only | 0.81 | 0.76 | 0.84 | 0.85 | 6.49E-02 | 1.64E-02 | 5.20E-01 | 5.28E-01 |
| 8131975 | NM_006024       | TAX1BP1   | Tax1 (human T-cell leukemia virus type I) binding protein 1                              |  | L359V only | 1.16 | 0.76 | 1.10 | 1.04 | 2.66E-01 | 2.66E-02 | 8.41E-01 | 1.00E+00 |
| 7925500 | NM_001821       | CHML      | choroideremia-like (Rab escort protein 2)                                                |  | L359V only | 0.95 | 0.76 | 0.92 | 0.95 | 8.13E-01 | 4.22E-02 | 8.77E-01 | 1.00E+00 |
| 8131143 | NM_001040167    | LFNG      | LFNG O-fucosylpeptide 3-beta-N-acetylglucosaminyltransferase                             |  | L359V only | 0.78 | 0.76 | 0.87 | 0.85 | 9.09E-02 | 4.67E-02 | 8.09E-01 | 7.29E-01 |
| 7975224 | NM_004094       | EIF2S1    | eukaryotic translation initiation factor 2, subunit 1 alpha, 35kDa                       |  | L359V only | 0.80 | 0.76 | 0.84 | 0.87 | 1.19E-01 | 4.62E-02 | 7.38E-01 | 9.26E-01 |
| 8114455 | NM_004134       | HSPA9     | heat shock 70kDa protein 9 (mortalin)                                                    |  | L359V only | 0.81 | 0.76 | 0.90 | 0.93 | 6.50E-02 | 1.60E-02 | 8.25E-01 | 1.00E+00 |
| 8162313 | NM_013417       | IARS      | isoleucyl-tRNA synthetase                                                                |  | L359V only | 0.83 | 0.76 | 0.99 | 0.95 | 1.35E-01 | 2.48E-02 | 9.85E-01 | 1.00E+00 |
| 8108015 | NM_002154       | HSPA4     | heat shock 70kDa protein 4                                                               |  | L359V only | 0.85 | 0.76 | 0.92 | 0.89 | 1.28E-01 | 9.41E-03 | 8.36E-01 | 8.07E-01 |
| 8165107 | NM_052813       | CARD9     | caspace recruitment domain family, member 9                                              |  | L359V only | 0.85 | 0.76 | 0.90 | 0.89 | 2.11E-01 | 2.46E-02 | 8.36E-01 | 9.45E-01 |
| 8002919 | NM_001130089    | KARS      | lysyl-tRNA synthetase                                                                    |  | L359V only | 0.85 | 0.76 | 0.92 | 0.92 | 1.31E-01 | 1.07E-02 | 8.36E-01 | 1.00E+00 |
| 7897620 | NM_002631       | PGD       | phosphogluconate dehydrogenase                                                           |  | L359V only | 0.89 | 0.76 | 0.99 | 0.95 | 4.04E-01 | 2.14E-02 | 9.90E-01 | 1.00E+00 |
| 7907690 | NM_022371       | TOR3A     | torsin family 3, member A                                                                |  | L359V only | 0.87 | 0.76 | 0.90 | 0.91 | 3.14E-01 | 3.34E-02 | 8.48E-01 | 1.00E+00 |
| 8090030 | NM_024610       | HSPBAP1   | HSPB (heat shock 27kDa) associated protein 1                                             |  | L359V only | 0.87 | 0.76 | 0.88 | 0.92 | 3.96E-01 | 4.79E-02 | 8.25E-01 | 1.00E+00 |
| 7939902 | ENST00000399175 | LOC646813 | hypothetical LOC646813                                                                   |  | L359V only | 1.03 | 0.76 | 0.96 | 0.95 | 9.13E-01 | 4.59E-02 | 9.54E-01 | 1.00E+00 |
| 7972867 | NM_018386       | PCID2     | PCI domain containing 2                                                                  |  | L359V only | 0.85 | 0.76 | 0.91 | 0.93 | 2.04E-01 | 2.64E-02 | 8.52E-01 | 1.00E+00 |
| 8009693 | NM_017728       | TMEM104   | transmembrane protein 104                                                                |  | L359V only | 0.82 | 0.76 | 0.98 | 0.85 | 8.47E-02 | 1.42E-02 | 9.60E-01 | 4.98E-01 |
| 8114225 | NM_004893       | H2AFY     | H2A histone family, member Y                                                             |  | L359V only | 0.81 | 0.76 | 0.81 | 0.85 | 1.48E-01 | 4.67E-02 | 5.68E-01 | 7.88E-01 |
| 7915130 | NM_006802       | SF3A3     | splicing factor 3a, subunit 3, 60kDa                                                     |  | L359V only | 0.91 | 0.76 | 0.93 | 0.95 | 5.29E-01 | 2.59E-02 | 8.81E-01 | 1.00E+00 |
| 8056716 | NM_014168       | METTL5    | methyltransferase like 5                                                                 |  | L359V only | 0.97 | 0.76 | 0.95 | 0.95 | 9.09E-01 | 4.64E-02 | 9.27E-01 | 1.00E+00 |
| 7935230 | NM_002860       | ALDH18A1  | aldehyde dehydrogenase 18 family, member A1                                              |  | L359V only | 0.90 | 0.76 | 1.01 | 0.96 | 5.41E-01 | 4.22E-02 | 9.96E-01 | 1.00E+00 |
| 8031260 | NM_153443       | KIR3DL3   | killer cell immunoglobulin-like receptor, three domains, long cytoplasmic tail, 3        |  | L359V only | 0.75 | 0.76 | 0.86 | 0.85 | 5.13E-02 | 3.89E-02 | 8.01E-01 | 7.18E-01 |
| 8173615 | NM_183353       | RNF12     | ring finger protein 12                                                                   |  | L359V only | 0.92 | 0.76 | 0.94 | 0.96 | 5.83E-01 | 2.61E-02 | 8.98E-01 | 1.00E+00 |
| 8130185 | NM_020861       | ZBTB2     | zinc finger and BTB domain containing 2                                                  |  | L359V only | 0.84 | 0.76 | 0.89 | 0.87 | 1.19E-01 | 1.39E-02 | 8.01E-01 | 6.62E-01 |
| 8177046 | ---             |           |                                                                                          |  | L359V only | 1.01 | 0.76 | 0.95 | 1.00 | 9.76E-01 | 2.55E-02 | 9.28E-01 | 1.00E+00 |
| 7925174 | NM_014765       | TOMM20    | translocase of outer mitochondrial membrane 20 homolog (yeast)                           |  | L359V only | 0.89 | 0.76 | 0.90 | 0.94 | 3.56E-01 | 1.31E-02 | 8.13E-01 | 1.00E+00 |
| 8085914 | NM_003615       | SLC4A7    | solute carrier family 4, sodium bicarbonate cotransporter, member 7                      |  | L359V only | 1.00 | 0.76 | 0.93 | 0.96 | 9.91E-01 | 1.63E-02 | 8.74E-01 | 1.00E+00 |
| 7992414 | NM_006453       | TBL3      | transducin (beta)-like 3                                                                 |  | L359V only | 0.80 | 0.76 | 0.91 | 0.86 | 1.33E-01 | 4.56E-02 | 8.70E-01 | 8.38E-01 |
| 8112458 | NM_003187       | TAF9      | TAF9 RNA polymerase II, TATA box binding protein (TBP)-associated factor, 32kDa          |  | L359V only | 0.85 | 0.75 | 0.95 | 0.91 | 1.80E-01 | 1.69E-02 | 9.04E-01 | 1.00E+00 |
| 8031223 | NM_006669       | LILRB1    | leukocyte immunoglobulin-like receptor, subfamily B (with TM and ITIM domains), member 1 |  | L359V only | 0.84 | 0.75 | 0.84 | 0.84 | 2.63E-01 | 4.13E-02 | 7.34E-01 | 7.09E-01 |
| 7956937 | NM_015646       | RAP1B     | RAP1B, member of RAS oncogene family                                                     |  | L359V only | 0.95 | 0.75 | 0.94 | 0.95 | 7.76E-01 | 3.84E-02 | 9.12E-01 | 1.00E+00 |
| 7977058 | NM_001969       | EIF5      | eukaryotic translation initiation factor 5                                               |  | L359V only | 0.91 | 0.75 | 0.87 | 0.88 | 4.32E-01 | 1.34E-02 | 7.44E-01 | 7.88E-01 |
| 8130952 | NM_002793       | PSMB1     | proteasome (prosome, macropain) subunit, beta type, 1                                    |  | L359V only | 0.86 | 0.75 | 0.87 | 0.91 | 3.10E-01 | 3.21E-02 | 8.01E-01 | 1.00E+00 |
| 7917771 | NM_014597       | DNTT1P2   | deoxynucleotidyltransferase, terminal, interacting protein 2                             |  | L359V only | 0.87 | 0.75 | 0.88 | 0.89 | 3.64E-01 | 3.20E-02 | 8.23E-01 | 1.00E+00 |
| 8144894 | NM_018142       | INTS10    | integrator complex subunit 10                                                            |  | L359V only | 0.79 | 0.75 | 0.92 | 0.89 | 8.93E-02 | 3.14E-02 | 8.80E-01 | 1.00E+00 |
| 8073875 | NM_018006       | TRMU      | tRNA 5-methylaminomethyl-2-thiouridylate methyltransferase                               |  | L359V only | 0.88 | 0.75 | 0.89 | 0.88 | 3.52E-01 | 2.30E-02 | 8.25E-01 | 8.78E-01 |
| 7918345 | NM_002790       | PSMA5     | proteasome (prosome, macropain) subunit, alpha type, 5                                   |  | L359V only | 0.84 | 0.75 | 0.87 | 0.87 | 2.60E-01 | 4.67E-02 | 8.23E-01 | 9.55E-01 |
| 8019762 | NM_000918       | P4HB      | prolyl 4-hydroxylase, beta polypeptide                                                   |  | L359V only | 0.87 | 0.75 | 0.92 | 0.90 | 2.45E-01 | 1.66E-02 | 8.56E-01 | 9.45E-01 |
| 7904000 | NM_007204       | DDX20     | DEAD (Asp-Glu-Ala-Asp) box polypeptide 20                                                |  | L359V only | 0.86 | 0.75 | 0.78 | 0.87 | 3.32E-01 | 4.63E-02 | 4.65E-01 | 9.24E-01 |
| 8016578 | NM_005827       | SLC35B1   | solute carrier family 35, member B1                                                      |  | L359V only | 0.83 | 0.75 | 0.88 | 0.85 | 9.71E-02 | 1.07E-02 | 7.44E-01 | 4.98E-01 |
| 8151401 | NM_001001481    | UBE2W     | ubiquitin-conjugating enzyme E2W (putative)                                              |  | L359V only | 0.94 | 0.75 | 0.97 | 0.97 | 7.28E-01 | 1.90E-02 | 9.55E-01 | 1.00E+00 |
| 8169365 | NM_032227       | TMEM164   | transmembrane protein 164                                                                |  | L359V only | 1.10 | 0.75 | 0.96 | 0.92 | 5.74E-01 | 3.46E-02 | 9.42E-01 | 1.00E+00 |
| 8049544 | NM_001137550    | LRRFIP1   | leucine rich repeat (in FLII) interacting protein 1                                      |  | L359V only | 0.94 | 0.75 | 0.85 | 0.90 | 7.37E-01 | 3.98E-02 | 7.74E-01 | 1.00E+00 |
| 7924526 | NM_005426       | TP53BP2   | tumor protein p53 binding protein, 2                                                     |  | L359V only | 0.88 | 0.75 | 0.87 | 0.88 | 3.73E-01 | 2.21E-02 | 7.81E-01 | 8.99E-01 |
| 8057045 | NM_181342       | FKBP7     | FK506 binding protein 7                                                                  |  | L359V only | 0.95 | 0.75 | 0.98 | 0.93 | 8.12E-01 | 3.41E-02 | 9.80E-01 | 1.00E+00 |
| 8050507 | NM_001006657    | WDR35     | WD repeat domain 35                                                                      |  | L359V only | 0.76 | 0.75 | 0.87 | 0.89 | 8.53E-02 | 4.93E-02 | 8.23E-01 | 1.00E+00 |
| 7940857 | NM_006819       | STIP1     | stress-induced-phosphoprotein 1                                                          |  | L359V only | 0.80 | 0.75 | 0.89 | 0.87 | 1.15E-01 | 3.62E-02 | 8.36E-01 | 9.32E-01 |
| 8087596 | NM_003549       | HYAL3     | hyaluronoglucosaminidase 3                                                               |  | L359V only | 1.00 | 0.75 | 1.09 | 0.92 | 9.88E-01 | 1.92E-02 | 8.53E-01 | 1.00E+00 |
| 8070102 | NM_000819       | GART      | phosphoribosylglycinamide formyltransferase, phosphoribosylglycinamide synthetase        |  | L359V only | 0.85 | 0.75 | 0.98 | 0.94 | 1.63E-01 | 1.25E-02 | 9.76E-01 | 1.00E+00 |
| 7945740 | NM_016093       | RPL26L1   | ribosomal protein L26-like 1                                                             |  | L359V only | 0.82 | 0.75 | 0.91 | 0.86 | 1.75E-01 | 3.28E-02 | 8.58E-01 | 8.38E-01 |
| 7956949 | NM_020401       | NUP107    | nucleoporin 107kDa                                                                       |  | L359V only | 0.84 | 0.75 | 0.88 | 0.89 | 1.74E-01 | 2.06E-02 | 8.05E-01 | 9.15E-01 |
| 8014081 | NM_018428       | UTP6      | UTP6, small subunit (SSU) processome component, homolog (yeast)                          |  | L359V only | 0.85 | 0.75 | 0.91 | 0.91 | 2.04E-01 | 1.62E-02 | 8.42E-01 | 1.00E+00 |
| 8031346 | NM_002255       | KIR2DL4   | killer cell immunoglobulin-like receptor, two domains, long cytoplasmic tail, 4          |  | L359V only | 0.74 | 0.75 | 0.82 | 0.82 | 5.44E-02 | 4.69E-02 | 6.90E-01 | 6.27E-01 |
| 7990700 | NM_025234       | WDR61     | WD repeat domain 61                                                                      |  | L359V only | 0.82 | 0.75 | 0.88 | 0.87 | 1.97E-01 | 4.23E-02 | 8.25E-01 | 9.40E-01 |
| 8120402 | NM_004282       | BAG2      | BCL2-associated athanogene 2                                                             |  | L359V only | 0.76 | 0.75 | 0.90 | 0.87 | 5.11E-02 | 3.27E-02 | 8.50E-01 | 9.21E-01 |
| 8123148 | NM_014161       | MRPL18    | mitochondrial ribosomal protein L18                                                      |  | L359V only | 0.84 | 0.75 | 0.91 | 0.88 | 1.93E-01 | 2.27E-02 | 8.42E-01 | 9.04E-01 |
| 8167305 | NM_006579       | EBP       | emopamil binding protein (sterol isomerase)                                              |  | L359V only | 0.85 | 0.75 | 0.93 | 0.87 | 3.14E-01 | 4.07E-02 | 8.98E-01 | 9.55E-01 |
| 8062326 | NM_018840       | C20orf24  | chromosome 20 open reading frame 24                                                      |  | L359V only | 0.81 | 0.75 | 0.83 | 0.84 | 1.14E-01 | 2.19E-02 | 5.88E-01 | 5.69E-01 |
| 8098150 | NM_018352       | C4orf43   | chromosome 4 open reading frame 43                                                       |  | L359V only | 0.93 | 0.75 | 0.96 | 0.95 | 6.19E-01 | 1.93E-02 | 9.47E-01 | 1.00E+00 |
| 8164883 | NM_033161       | SURF4     | surfeit 4                                                                                |  | L359V only | 0.88 | 0.75 | 0.96 | 0.90 | 2.37E-01 | 7.01E-03 | 9.22E-01 | 8.60E-01 |

|         |              |          |                                                                                 |            |      |      |      |      |          |          |          |          |
|---------|--------------|----------|---------------------------------------------------------------------------------|------------|------|------|------|------|----------|----------|----------|----------|
| 8096081 | NM_021204    | ENOPH1   | enolase-phosphatase 1                                                           | L359V only | 0.78 | 0.75 | 0.87 | 0.87 | 9.78E-02 | 3.96E-02 | 8.09E-01 | 9.13E-01 |
| 8043861 | NM_015904    | EIF5B    | eukaryotic translation initiation factor 5B                                     | L359V only | 0.83 | 0.75 | 0.91 | 0.91 | 7.83E-02 | 8.79E-03 | 8.36E-01 | 9.89E-01 |
| 7913110 | BC034589     | KIAA0090 | KIAA0090                                                                        | L359V only | 0.83 | 0.75 | 0.94 | 0.90 | 1.46E-01 | 1.66E-02 | 8.95E-01 | 1.00E+00 |
| 8021716 | NM_014177    | C18orf55 | chromosome 18 open reading frame 55                                             | L359V only | 0.86 | 0.75 | 0.91 | 0.89 | 2.27E-01 | 1.56E-02 | 8.47E-01 | 9.45E-01 |
| 8097480 | NM_057175    | NARG1    | NMDA receptor regulated 1                                                       | L359V only | 0.86 | 0.75 | 0.93 | 0.91 | 1.48E-01 | 6.70E-03 | 8.41E-01 | 8.95E-01 |
| 7924388 | NM_006085    | BPNT1    | 3'(2'), 5'-bisphosphate nucleotidase 1                                          | L359V only | 1.00 | 0.75 | 0.92 | 0.90 | 9.95E-01 | 2.81E-02 | 8.80E-01 | 1.00E+00 |
| 7934870 | NM_032810    | ATAD1    | ATPase family, AAA domain containing 1                                          | L359V only | 0.91 | 0.75 | 0.92 | 0.97 | 5.76E-01 | 2.64E-02 | 8.80E-01 | 1.00E+00 |
| 7926807 | NM_014317    | PDSS1    | prenyl (decaprenyl) diphosphate synthase, subunit 1                             | L359V only | 0.80 | 0.75 | 0.88 | 0.88 | 7.37E-02 | 1.88E-02 | 7.98E-01 | 8.38E-01 |
| 7957052 | NM_006431    | CCT2     | chaperonin containing TCP1, subunit 2 (beta)                                    | L359V only | 0.84 | 0.75 | 0.88 | 0.87 | 1.77E-01 | 1.98E-02 | 8.01E-01 | 8.17E-01 |
| 8119898 | NM_001025366 | VEGFA    | vascular endothelial growth factor A                                            | L359V only | 0.81 | 0.75 | 1.13 | 1.01 | 1.95E-01 | 4.64E-02 | 8.38E-01 | 1.00E+00 |
| 8059413 | NM_014689    | DOCK10   | dedicator of cytokinesis 10                                                     | L359V only | 1.16 | 0.75 | 0.98 | 0.93 | 3.09E-01 | 2.98E-02 | 9.76E-01 | 1.00E+00 |
| 7985240 | NM_007364    | TMED3    | transmembrane emp24 protein transport domain containing 3                       | L359V only | 0.90 | 0.75 | 1.07 | 0.92 | 5.32E-01 | 4.26E-02 | 9.01E-01 | 1.00E+00 |
| 7927267 | NM_019054    | FAM35A   | family with sequence similarity 35, member A                                    | L359V only | 0.91 | 0.75 | 0.95 | 0.93 | 6.16E-01 | 4.77E-02 | 9.39E-01 | 1.00E+00 |
| 8092251 | NM_021629    | GNB4     | guanine nucleotide binding protein (G protein), beta polypeptide 4              | L359V only | 0.92 | 0.75 | 0.96 | 0.94 | 6.07E-01 | 2.84E-02 | 9.52E-01 | 1.00E+00 |
| 7935054 | ---          | ---      | ---                                                                             | L359V only | 0.90 | 0.75 | 0.83 | 0.94 | 5.74E-01 | 4.13E-02 | 7.23E-01 | 1.00E+00 |
| 7959298 | NM_001080825 | TMEM120B | transmembrane protein 120B                                                      | L359V only | 0.84 | 0.75 | 1.01 | 0.91 | 2.21E-01 | 2.91E-02 | 9.94E-01 | 1.00E+00 |
| 8174684 | NM_017544    | NKRF     | NFKB repressing factor                                                          | L359V only | 0.79 | 0.74 | 0.90 | 0.86 | 1.10E-01 | 3.26E-02 | 8.41E-01 | 8.36E-01 |
| 8152255 | NM_030780    | SLC25A32 | solute carrier family 25, member 32                                             | L359V only | 0.79 | 0.74 | 0.96 | 0.90 | 5.49E-02 | 1.45E-02 | 9.36E-01 | 9.78E-01 |
| 7903119 | NM_002858    | ABCD3    | ATP-binding cassette, sub-family D (ALD), member 3                              | L359V only | 0.91 | 0.74 | 0.79 | 0.86 | 5.03E-01 | 1.39E-02 | 2.51E-01 | 6.27E-01 |
| 7927108 | NM_014753    | BMS1     | BMS1 homolog, ribosome assembly protein (yeast)                                 | L359V only | 0.81 | 0.74 | 0.86 | 0.86 | 1.74E-01 | 4.13E-02 | 8.06E-01 | 8.85E-01 |
| 8001197 | NM_018092    | NETO2    | neuropilin (NRP) and tolloid (TLL)-like 2                                       | L359V only | 0.94 | 0.74 | 0.94 | 0.94 | 7.48E-01 | 3.24E-02 | 9.11E-01 | 1.00E+00 |
| 7979416 | NM_012460    | TIMM9    | translocase of inner mitochondrial membrane 9 homolog (yeast)                   | L359V only | 0.85 | 0.74 | 0.92 | 0.93 | 2.77E-01 | 3.28E-02 | 8.81E-01 | 1.00E+00 |
| 8069003 | NM_005049    | PWP2     | PWP2 periodic tryptophan protein homolog (yeast)                                | L359V only | 0.74 | 0.74 | 0.88 | 0.86 | 5.15E-02 | 3.84E-02 | 8.34E-01 | 8.88E-01 |
| 8058552 | NM_005896    | IDH1     | isocitrate dehydrogenase 1 (NADP+), soluble                                     | L359V only | 1.11 | 0.74 | 1.07 | 1.01 | 4.85E-01 | 2.39E-02 | 8.98E-01 | 1.00E+00 |
| 8147864 | NM_014673    | TTC35    | tetratricopeptide repeat domain 35                                              | L359V only | 0.82 | 0.74 | 0.82 | 0.87 | 1.21E-01 | 1.86E-02 | 5.05E-01 | 8.14E-01 |
| 8175369 | NM_024597    | MAP7D3   | MAP7 domain containing 3                                                        | L359V only | 0.82 | 0.74 | 0.86 | 0.90 | 1.52E-01 | 2.50E-02 | 7.65E-01 | 1.00E+00 |
| 7987165 | NM_020371    | AVEN     | apoptosis, caspase activation inhibitor                                         | L359V only | 0.89 | 0.74 | 0.88 | 0.91 | 5.12E-01 | 4.00E-02 | 8.30E-01 | 1.00E+00 |
| 8028186 | NM_007145    | ZNF146   | zinc finger protein 146                                                         | L359V only | 0.86 | 0.74 | 1.00 | 0.94 | 3.56E-01 | 4.35E-02 | 9.99E-01 | 1.00E+00 |
| 7916219 | BC015313     | C1orf163 | chromosome 1 open reading frame 163                                             | L359V only | 0.77 | 0.74 | 0.93 | 0.89 | 6.23E-02 | 2.89E-02 | 8.93E-01 | 9.88E-01 |
| 7939265 | NM_024662    | NAT10    | N-acetyltransferase 10 (GCN5-related)                                           | L359V only | 0.80 | 0.74 | 0.95 | 0.93 | 6.36E-02 | 1.19E-02 | 9.15E-01 | 1.00E+00 |
| 7964832 | ---          | ---      | ---                                                                             | L359V only | 1.00 | 0.74 | 0.85 | 0.94 | 9.98E-01 | 4.85E-02 | 8.01E-01 | 1.00E+00 |
| 8003425 | NM_005187    | CBFA2T3  | core-binding factor, runt domain, alpha subunit 2; translocated to, 3           | L359V only | 0.80 | 0.74 | 0.85 | 0.83 | 6.48E-02 | 1.35E-02 | 6.65E-01 | 4.02E-01 |
| 8031277 | NM_015868    | KIR2DL3  | killer cell immunoglobulin-like receptor, two domains, long cytoplasmic tail, 3 | L359V only | 0.73 | 0.74 | 0.86 | 0.82 | 5.00E-02 | 4.76E-02 | 8.09E-01 | 6.34E-01 |
| 7931268 | NM_016567    | BCCIP    | BRCA2 and CDKN1A interacting protein                                            | L359V only | 0.82 | 0.74 | 0.90 | 0.88 | 1.49E-01 | 2.15E-02 | 8.38E-01 | 9.27E-01 |
| 7910030 | NM_144989    | C1orf67  | chromosome 1 open reading frame 67                                              | L359V only | 1.00 | 0.74 | 1.01 | 1.00 | 9.87E-01 | 4.84E-02 | 9.94E-01 | 1.00E+00 |
| 8167270 | NM_177439    | FTSJ1    | FtsJ homolog 1 (E. coli)                                                        | L359V only | 0.82 | 0.74 | 0.92 | 0.87 | 1.75E-01 | 3.39E-02 | 8.81E-01 | 9.45E-01 |
| 7912112 | NM_018198    | DNAJC11  | DnaJ (Hsp40) homolog, subfamily C, member 11                                    | L359V only | 0.84 | 0.74 | 0.92 | 0.88 | 1.63E-01 | 1.42E-02 | 8.68E-01 | 8.44E-01 |
| 7919800 | NM_004079    | CTSS     | cathepsin S                                                                     | L359V only | 1.13 | 0.74 | 1.09 | 1.02 | 4.61E-01 | 3.01E-02 | 8.81E-01 | 1.00E+00 |
| 8007397 | NM_176863    | PSME3    | proteasome (prosome, macropain) activator subunit 3 (PA28 gamma; Ki)            | L359V only | 0.83 | 0.74 | 0.91 | 0.87 | 1.85E-01 | 2.63E-02 | 8.59E-01 | 8.92E-01 |
| 7965436 | NM_003566    | EEA1     | early endosome antigen 1                                                        | L359V only | 0.95 | 0.74 | 0.98 | 0.96 | 7.89E-01 | 1.76E-02 | 9.73E-01 | 1.00E+00 |
| 8010078 | NR_004397    | SNORD1C  | small nucleolar RNA, C                                                          | L359V only | 0.80 | 0.74 | 1.08 | 0.92 | 1.26E-01 | 2.65E-02 | 8.86E-01 | 1.00E+00 |
| 8118314 | NM_005346    | HSPA1B   | heat shock 70kDa protein 1B                                                     | L359V only | 0.80 | 0.74 | 0.83 | 0.82 | 1.79E-01 | 4.88E-02 | 7.46E-01 | 6.34E-01 |
| 8123362 | BX647686     | CCR6     | chemokine (C-C motif) receptor 6                                                | L359V only | 0.89 | 0.74 | 0.80 | 0.85 | 5.29E-01 | 4.96E-02 | 6.65E-01 | 8.78E-01 |
| 8050079 | NM_002936    | RNASEH1  | ribonuclease H1                                                                 | L359V only | 0.88 | 0.74 | 1.00 | 0.94 | 3.19E-01 | 1.39E-02 | 9.98E-01 | 1.00E+00 |
| 8163185 | NM_003329    | TXN      | thioredoxin                                                                     | L359V only | 0.90 | 0.74 | 0.98 | 0.94 | 5.37E-01 | 2.91E-02 | 9.81E-01 | 1.00E+00 |
| 8113602 | NM_152549    | CCDC112  | coiled-coil domain containing 112                                               | L359V only | 0.88 | 0.74 | 0.82 | 0.92 | 4.46E-01 | 3.17E-02 | 6.50E-01 | 1.00E+00 |
| 8073242 | NM_000026    | ADSL     | adenylosuccinate lyase                                                          | L359V only | 0.82 | 0.74 | 0.90 | 0.90 | 8.62E-02 | 1.06E-02 | 8.17E-01 | 9.71E-01 |
| 7951034 | NR_002920    | SNORA8   | small nucleolar RNA, H                                                          | L359V only | 0.90 | 0.74 | 0.93 | 0.96 | 5.05E-01 | 2.46E-02 | 8.86E-01 | 1.00E+00 |
| 8116086 | NM_024872    | DOK3     | docking protein 3                                                               | L359V only | 0.77 | 0.74 | 0.94 | 0.88 | 5.40E-02 | 2.17E-02 | 9.08E-01 | 9.17E-01 |
| 7957467 | NM_001009894 | C12orf29 | chromosome 12 open reading frame 29                                             | L359V only | 0.76 | 0.74 | 0.94 | 0.90 | 7.41E-02 | 3.36E-02 | 9.22E-01 | 1.00E+00 |
| 8092409 | NM_018622    | PARL     | presenilin associated, rhomboid-like                                            | L359V only | 0.94 | 0.74 | 0.88 | 0.90 | 7.03E-01 | 1.74E-02 | 8.01E-01 | 1.00E+00 |
| 7942409 | NM_176796    | P2RY6    | pyrimidineric receptor P2Y, G-protein coupled, 6                                | L359V only | 0.75 | 0.74 | 0.86 | 0.84 | 8.65E-02 | 4.88E-02 | 8.20E-01 | 8.21E-01 |
| 7961964 | NM_018164    | C12orf11 | chromosome 12 open reading frame 11                                             | L359V only | 0.92 | 0.74 | 1.04 | 0.98 | 4.65E-01 | 6.59E-03 | 9.36E-01 | 1.00E+00 |
| 8104825 | NM_018321    | BXDC2    | brix domain containing 2                                                        | L359V only | 0.94 | 0.74 | 0.92 | 0.91 | 6.81E-01 | 8.65E-03 | 8.38E-01 | 1.00E+00 |
| 7922807 | NM_015101    | GLT25D2  | glycosyltransferase 25 domain containing 2                                      | L359V only | 0.99 | 0.74 | 0.96 | 0.96 | 9.80E-01 | 3.39E-02 | 9.48E-01 | 1.00E+00 |
| 8045247 | NM_017958    | PLEKHB2  | pleckstrin homology domain containing, family B (evectins) member 2             | L359V only | 0.80 | 0.74 | 0.90 | 0.89 | 6.76E-02 | 1.16E-02 | 8.21E-01 | 8.90E-01 |
| 8084035 | NM_016331    | ZNF639   | zinc finger protein 639                                                         | L359V only | 0.98 | 0.74 | 0.91 | 0.95 | 9.47E-01 | 3.99E-02 | 8.81E-01 | 1.00E+00 |
| 8023195 | NM_005901    | SMAD2    | SMAD family member 2                                                            | L359V only | 0.82 | 0.74 | 0.80 | 0.86 | 1.70E-01 | 2.82E-02 | 5.08E-01 | 8.36E-01 |
| 7920984 | NM_005998    | CCT3     | chaperonin containing TCP1, subunit 3 (gamma)                                   | L359V only | 0.79 | 0.74 | 0.94 | 0.88 | 5.28E-02 | 1.29E-02 | 8.93E-01 | 8.60E-01 |
| 7966638 | NM_016196    | RBM19    | RNA binding motif protein 19                                                    | L359V only | 0.77 | 0.74 | 0.87 | 0.87 | 5.89E-02 | 2.14E-02 | 7.98E-01 | 8.38E-01 |
| 8095539 | NM_020368    | UTP3     | UTP3, small subunit (SSU) processome component, homolog (S. cerevisiae)         | L359V only | 0.79 | 0.74 | 0.81 | 0.86 | 1.17E-01 | 3.00E-02 | 5.62E-01 | 8.49E-01 |
| 7917088 | NM_005482    | PIGK     | phosphatidylinositol glycan anchor biosynthesis, class K                        | L359V only | 0.89 | 0.73 | 0.90 | 0.94 | 3.26E-01 | 6.59E-03 | 8.09E-01 | 1.00E+00 |
| 8178086 | NM_005346    | HSPA1B   | heat shock 70kDa protein 1B                                                     | L359V only | 0.80 | 0.73 | 0.82 | 0.81 | 1.74E-01 | 4.63E-02 | 7.38E-01 | 6.27E-01 |
| 8179324 | NM_005346    | HSPA1B   | heat shock 70kDa protein 1B                                                     | L359V only | 0.80 | 0.73 | 0.82 | 0.81 | 1.74E-01 | 4.63E-02 | 7.38E-01 | 6.27E-01 |
| 8043349 | NM_022662    | ANAPC1   | anaphase promoting complex subunit 1                                            | L359V only | 0.85 | 0.73 | 0.87 | 0.88 | 2.56E-01 | 2.16E-02 | 8.09E-01 | 9.45E-01 |

|         |                 |          |                                                                                 |            |      |      |      |      |          |          |          |          |
|---------|-----------------|----------|---------------------------------------------------------------------------------|------------|------|------|------|------|----------|----------|----------|----------|
| 8030437 | NM_198319       | PRMT1    | protein arginine methyltransferase 1                                            | L359V only | 0.77 | 0.73 | 0.95 | 0.85 | 7.87E-02 | 2.83E-02 | 9.27E-01 | 7.60E-01 |
| 8142019 | NM_002553       | ORC5L    | origin recognition complex, subunit 5-like (yeast)                              | L359V only | 0.84 | 0.73 | 0.91 | 0.94 | 2.08E-01 | 1.74E-02 | 8.52E-01 | 1.00E+00 |
| 8168357 | NR_002309       | RPS26L1  | ribosomal protein S26-like 1                                                    | L359V only | 0.82 | 0.73 | 0.92 | 0.85 | 7.57E-02 | 7.67E-03 | 8.41E-01 | 5.20E-01 |
| 8110803 | NM_0030782      | CLPTM1L  | CLPTM1-like                                                                     | L359V only | 0.80 | 0.73 | 0.89 | 0.86 | 8.19E-02 | 1.51E-02 | 8.14E-01 | 6.66E-01 |
| 7929779 | NM_000392       | ABCC2    | ATP-binding cassette, sub-family C (CFTR                                        | L359V only | 0.93 | 0.73 | 0.96 | 0.90 | 7.45E-01 | 3.78E-02 | 9.58E-01 | 1.00E+00 |
| 7904314 | NM_003594       | TF2F     | transcription termination factor, RNA polymerase II                             | L359V only | 0.80 | 0.73 | 0.90 | 0.87 | 5.02E-02 | 7.29E-03 | 8.09E-01 | 6.15E-01 |
| 8011832 | NM_002532       | NUP88    | nucleoporin 88kDa                                                               | L359V only | 0.78 | 0.73 | 0.86 | 0.88 | 7.10E-02 | 2.03E-02 | 7.79E-01 | 9.69E-01 |
| 8117081 | NM_153042       | AOF1     | amine oxidase (flavin containing) domain 1                                      | L359V only | 0.85 | 0.73 | 0.90 | 0.88 | 3.35E-01 | 3.81E-02 | 8.70E-01 | 1.00E+00 |
| 8133976 | NM_006716       | DBF4     | DBF4 homolog (S. cerevisiae)                                                    | L359V only | 1.00 | 0.73 | 0.94 | 0.95 | 9.95E-01 | 4.33E-02 | 9.22E-01 | 1.00E+00 |
| 8147447 | NM_014754       | PTDSS1   | phosphatidylserine synthase 1                                                   | L359V only | 0.82 | 0.73 | 0.89 | 0.90 | 8.65E-02 | 9.41E-03 | 8.11E-01 | 9.59E-01 |
| 8075106 | NM_003595       | TPST2    | tyrosylprotein sulfotransferase 2                                               | L359V only | 0.88 | 0.73 | 0.91 | 0.90 | 5.11E-01 | 4.78E-02 | 8.83E-01 | 1.00E+00 |
| 8102342 | NM_024090       | ELOVL6   | ELOVL family member 6, elongation of long chain fatty acids (FEN1               | L359V only | 0.83 | 0.73 | 0.88 | 0.92 | 2.15E-01 | 2.48E-02 | 8.16E-01 | 1.00E+00 |
| 7969428 | NM_006002       | UCHL3    | ubiquitin carboxyl-terminal esterase L3 (ubiquitin thiolesterase)               | L359V only | 0.84 | 0.73 | 0.93 | 0.92 | 3.30E-01 | 4.48E-02 | 9.01E-01 | 1.00E+00 |
| 8132070 | NM_002047       | GARS     | glycyl-tRNA synthetase                                                          | L359V only | 0.90 | 0.73 | 1.05 | 0.98 | 5.25E-01 | 2.98E-02 | 9.37E-01 | 1.00E+00 |
| 8054930 | NM_032390       | MKI67IP  | MKI67 (FHA domain) interacting nucleolar phosphoprotein                         | L359V only | 0.76 | 0.73 | 0.90 | 0.86 | 6.53E-02 | 2.66E-02 | 8.58E-01 | 8.36E-01 |
| 7912928 | NM_003000       | SDHB     | succinate dehydrogenase complex, subunit B, iron sulfur (lp)                    | L359V only | 0.86 | 0.73 | 0.94 | 0.92 | 3.48E-01 | 3.63E-02 | 9.15E-01 | 1.00E+00 |
| 8041360 | NM_017735       | TTC27    | tetratricopeptide repeat domain 27                                              | L359V only | 1.19 | 0.73 | 0.92 | 0.95 | 2.63E-01 | 3.20E-02 | 8.86E-01 | 1.00E+00 |
| 8084634 | NM_016306       | DNAJB11  | DnaJ (Hsp40) homolog, subfamily B, member 11                                    | L359V only | 0.88 | 0.73 | 0.87 | 0.90 | 3.21E-01 | 1.15E-02 | 7.45E-01 | 9.81E-01 |
| 7969166 | NM_173605       | KCNRG    | potassium channel regulator                                                     | L359V only | 0.85 | 0.73 | 0.97 | 0.90 | 3.06E-01 | 3.28E-02 | 9.59E-01 | 1.00E+00 |
| 8098177 | NM_007246       | KLHL2    | kelch-like 2, Mayven (Drosophila)                                               | L359V only | 0.92 | 0.73 | 0.89 | 0.90 | 6.08E-01 | 1.38E-02 | 8.14E-01 | 1.00E+00 |
| 8053036 | NM_016058       | TPRKB    | TP53RK binding protein                                                          | L359V only | 1.01 | 0.73 | 0.97 | 0.95 | 9.67E-01 | 1.63E-02 | 9.65E-01 | 1.00E+00 |
| 8080911 | NM_032505       | KBTBD8   | kelch repeat and BTB (POZ) domain containing 8                                  | L359V only | 0.81 | 0.73 | 0.85 | 0.88 | 1.26E-01 | 1.92E-02 | 7.28E-01 | 8.95E-01 |
| 7939477 | NM_139178       | ALKBH3   | alkB, alkylation repair homolog 3 (E. coli)                                     | L359V only | 0.78 | 0.73 | 0.84 | 0.89 | 1.19E-01 | 3.37E-02 | 7.50E-01 | 1.00E+00 |
| 8019796 | NM_002359       | MAFG     | v-maf musculoaponeurotic fibrosarcoma oncogene homolog G (avian)                | L359V only | 0.88 | 0.73 | 0.81 | 0.82 | 3.87E-01 | 2.05E-02 | 5.20E-01 | 4.88E-01 |
| 7999025 | NM_016292       | TRAP1    | TNF receptor-associated protein 1                                               | L359V only | 0.76 | 0.73 | 0.96 | 0.92 | 6.04E-02 | 2.64E-02 | 9.42E-01 | 1.00E+00 |
| 8000413 | NM_145080       | NSMCE1   | non-SMC element 1 homolog (S. cerevisiae)                                       | L359V only | 0.96 | 0.73 | 0.99 | 0.96 | 8.31E-01 | 8.82E-03 | 9.89E-01 | 1.00E+00 |
| 7948900 | NR_002561       | SNORD30  | small nucleolar RNA, C                                                          | L359V only | 0.84 | 0.73 | 1.00 | 0.91 | 2.81E-01 | 3.01E-02 | 9.99E-01 | 1.00E+00 |
| 8142774 | NM_018077       | RBM28    | RNA binding motif protein 28                                                    | L359V only | 0.84 | 0.73 | 0.90 | 0.90 | 1.61E-01 | 1.24E-02 | 8.36E-01 | 1.00E+00 |
| 8018196 | NM_139018       | CD300LF  | CD300 molecule-like family member f                                             | L359V only | 0.92 | 0.73 | 0.95 | 0.91 | 5.57E-01 | 1.26E-02 | 9.21E-01 | 1.00E+00 |
| 8101992 | NM_022154       | SLC39A8  | solute carrier family 39 (zinc transporter), member 8                           | L359V only | 0.80 | 0.73 | 0.92 | 0.88 | 5.18E-02 | 7.84E-03 | 8.53E-01 | 7.47E-01 |
| 7939465 | NM_016142       | HSD17B12 | hydroxysteroid (17-beta) dehydrogenase 12                                       | L359V only | 0.93 | 0.73 | 0.92 | 0.97 | 6.21E-01 | 1.11E-02 | 8.70E-01 | 1.00E+00 |
| 7926207 | NM_006023       | CDC123   | cell division cycle 123 homolog (S. cerevisiae)                                 | L359V only | 0.83 | 0.73 | 0.89 | 0.88 | 1.38E-01 | 1.33E-02 | 8.14E-01 | 8.51E-01 |
| 8136631 | NM_003143       | SSBP1    | single-stranded DNA binding protein 1                                           | L359V only | 0.91 | 0.73 | 0.97 | 0.94 | 5.99E-01 | 2.41E-02 | 9.65E-01 | 1.00E+00 |
| 8158224 | NM_005094       | SLC27A4  | solute carrier family 27 (fatty acid transporter), member 4                     | L359V only | 0.85 | 0.73 | 1.00 | 0.90 | 1.90E-01 | 1.04E-02 | 9.96E-01 | 9.84E-01 |
| 8085300 | NM_183352       | SEC13    | SEC13 homolog (S. cerevisiae)                                                   | L359V only | 0.90 | 0.73 | 0.94 | 0.89 | 5.57E-01 | 3.78E-02 | 9.16E-01 | 1.00E+00 |
| 7924351 | NM_004446       | EPRS     | glutamyl-prolyl-tRNA synthetase                                                 | L359V only | 0.84 | 0.73 | 0.96 | 0.95 | 1.77E-01 | 1.18E-02 | 9.36E-01 | 1.00E+00 |
| 7917674 | AK300794        | SET      | SET nuclear oncogene                                                            | L359V only | 0.88 | 0.73 | 0.87 | 0.90 | 2.88E-01 | 8.89E-03 | 7.38E-01 | 9.45E-01 |
| 8147548 | NM_015029       | POP1     | processing of precursor 1, ribonuclease P                                       | L359V only | 0.80 | 0.73 | 0.83 | 0.82 | 7.90E-02 | 1.40E-02 | 6.11E-01 | 4.41E-01 |
| 8026520 | NM_005370       | RAB8A    | RAB8A, member RAS oncogene family                                               | L359V only | 0.83 | 0.73 | 0.85 | 0.85 | 1.81E-01 | 1.93E-02 | 7.44E-01 | 7.35E-01 |
| 7932311 | NM_012425       | RSU1     | Ras suppressor protein 1                                                        | L359V only | 0.80 | 0.73 | 0.87 | 0.86 | 1.47E-01 | 2.88E-02 | 8.15E-01 | 9.07E-01 |
| 8115664 | ENST00000393959 | GABRB2   | gamma-aminobutyric acid (GABA) A receptor, beta 2                               | L359V only | 0.79 | 0.73 | 0.83 | 0.84 | 1.04E-01 | 2.26E-02 | 6.65E-01 | 6.66E-01 |
| 7986110 | NM_002005       | FES      | feline sarcoma oncogene                                                         | L359V only | 0.77 | 0.73 | 0.94 | 0.85 | 6.39E-02 | 2.08E-02 | 9.01E-01 | 7.21E-01 |
| 7995697 | NM_017839       | LPCAT2   | lysophosphatidylcholine acyltransferase 2                                       | L359V only | 1.11 | 0.73 | 1.11 | 0.98 | 4.23E-01 | 8.88E-03 | 8.23E-01 | 1.00E+00 |
| 8128138 | NM_014611       | MDN1     | MDN1, midasin homolog (yeast)                                                   | L359V only | 0.79 | 0.73 | 0.83 | 0.86 | 1.51E-01 | 4.31E-02 | 7.66E-01 | 9.45E-01 |
| 8103437 | NM_005038       | PPID     | peptidylprolyl isomerase D                                                      | L359V only | 0.90 | 0.73 | 0.86 | 0.88 | 6.12E-01 | 4.85E-02 | 8.23E-01 | 1.00E+00 |
| 8160647 | NM_004323       | BAG1     | BCL2-associated athanogene                                                      | L359V only | 0.78 | 0.73 | 0.87 | 0.85 | 6.87E-02 | 1.75E-02 | 8.01E-01 | 7.18E-01 |
| 8051547 | NM_005813       | PRKD3    | protein kinase D3                                                               | L359V only | 0.83 | 0.73 | 0.88 | 0.88 | 2.73E-01 | 4.56E-02 | 8.42E-01 | 1.00E+00 |
| 8145889 | NM_004095       | EIF4EBP1 | eukaryotic translation initiation factor 4E binding protein 1                   | L359V only | 0.88 | 0.73 | 1.11 | 0.98 | 4.92E-01 | 4.19E-02 | 8.76E-01 | 1.00E+00 |
| 8112331 | NM_030940       | ISCA1    | iron-sulfur cluster assembly 1 homolog (S. cerevisiae)                          | L359V only | 0.87 | 0.72 | 0.94 | 0.94 | 3.25E-01 | 1.64E-02 | 9.06E-01 | 1.00E+00 |
| 7970737 | NM_004119       | FLT3     | fms-related tyrosine kinase 3                                                   | L359V only | 0.96 | 0.72 | 0.81 | 0.96 | 8.79E-01 | 4.82E-02 | 7.33E-01 | 1.00E+00 |
| 7979473 | NM_016029       | DHRS7    | dehydrogenase                                                                   | L359V only | 0.91 | 0.72 | 0.92 | 0.91 | 6.00E-01 | 2.96E-02 | 8.93E-01 | 1.00E+00 |
| 8072004 | NM_001013618    | IGLL3    | immunoglobulin lambda-like polypeptide 3                                        | L359V only | 0.82 | 0.72 | 1.07 | 0.94 | 1.70E-01 | 1.94E-02 | 8.97E-01 | 1.00E+00 |
| 8014787 | ---             | ---      | ---                                                                             | L359V only | 0.80 | 0.72 | 0.79 | 0.85 | 2.17E-01 | 4.98E-02 | 6.66E-01 | 9.18E-01 |
| 8044263 | NM_006267       | RANBP2   | RAN binding protein 2                                                           | L359V only | 0.89 | 0.72 | 0.89 | 0.92 | 3.63E-01 | 8.01E-03 | 8.03E-01 | 1.00E+00 |
| 8077858 | NM_001136031    | ATG7     | ATG7 autophagy related 7 homolog (S. cerevisiae)                                | L359V only | 0.86 | 0.72 | 0.92 | 0.88 | 2.46E-01 | 1.12E-02 | 8.76E-01 | 8.65E-01 |
| 7989915 | NM_017858       | TIPIN    | TIMELESS interacting protein                                                    | L359V only | 0.85 | 0.72 | 0.80 | 0.88 | 3.52E-01 | 4.23E-02 | 6.50E-01 | 1.00E+00 |
| 7930882 | NM_207009       | FAM45A   | family with sequence similarity 45, member A                                    | L359V only | 0.91 | 0.72 | 1.04 | 0.92 | 4.89E-01 | 6.74E-03 | 9.33E-01 | 1.00E+00 |
| 8030364 | NR_000019       | SNORD34  | small nucleolar RNA, C                                                          | L359V only | 0.81 | 0.72 | 1.00 | 0.93 | 1.84E-01 | 2.84E-02 | 9.99E-01 | 1.00E+00 |
| 8032863 | NM_019107       | C19orf10 | chromosome 19 open reading frame 10                                             | L359V only | 0.82 | 0.72 | 0.93 | 0.87 | 7.11E-02 | 5.36E-03 | 8.76E-01 | 6.27E-01 |
| 8039859 | NM_002255       | KIR2DL4  | killer cell immunoglobulin-like receptor, two domains, long cytoplasmic tail, 4 | L359V only | 0.74 | 0.72 | 0.81 | 0.81 | 7.09E-02 | 3.85E-02 | 7.01E-01 | 6.27E-01 |
| 7942879 | NM_018480       | TMEM126B | transmembrane protein 126B                                                      | L359V only | 0.79 | 0.72 | 0.89 | 0.86 | 1.49E-01 | 3.46E-02 | 8.48E-01 | 9.11E-01 |
| 8138640 | NM_018947       | CYCS     | cytochrome c, somatic                                                           | L359V only | 0.89 | 0.72 | 0.93 | 0.91 | 4.81E-01 | 2.14E-02 | 8.94E-01 | 1.00E+00 |
| 7908639 | BC106877        | C1orf106 | chromosome 1 open reading frame 106                                             | L359V only | 0.80 | 0.72 | 0.89 | 0.84 | 7.09E-02 | 8.26E-03 | 8.09E-01 | 4.98E-01 |
| 8166230 | NM_018360       | CXorf15  | chromosome X open reading frame 15                                              | L359V only | 0.82 | 0.72 | 1.01 | 0.93 | 1.04E-01 | 8.37E-03 | 9.91E-01 | 1.00E+00 |
| 8162086 | NM_015239       | AGTPBP1  | ATP                                                                             | L359V only | 0.87 | 0.72 | 0.88 | 0.91 | 2.11E-01 | 4.26E-03 | 7.14E-01 | 1.00E+00 |

|         |              |           |                                                                                    |            |      |      |      |      |          |          |          |          |
|---------|--------------|-----------|------------------------------------------------------------------------------------|------------|------|------|------|------|----------|----------|----------|----------|
| 8100495 | NM_002703    | PPAT      | phosphoribosyl pyrophosphate amidotransferase                                      | L359V only | 0.83 | 0.72 | 0.91 | 0.91 | 2.35E-01 | 2.85E-02 | 8.77E-01 | 1.00E+00 |
| 7926875 | NM_012342    | BAMBI     | BMP and activin membrane-bound inhibitor homolog ( <i>Xenopus laevis</i> )         | L359V only | 0.73 | 0.72 | 0.90 | 0.93 | 7.10E-02 | 4.61E-02 | 8.80E-01 | 1.00E+00 |
| 8044919 | NM_002881    | RALB      | v-ral simian leukemia viral oncogene homolog B (ras related; GTP binding protein)  | L359V only | 1.15 | 0.72 | 1.06 | 0.99 | 4.22E-01 | 3.03E-02 | 9.22E-01 | 1.00E+00 |
| 8064790 | NM_014737    | RASSF2    | Ras association (RalGDS                                                            | L359V only | 0.89 | 0.72 | 0.96 | 0.90 | 4.14E-01 | 1.01E-02 | 9.29E-01 | 1.00E+00 |
| 8088092 | NM_052859    | RFT1      | RFT1 homolog ( <i>S. cerevisiae</i> )                                              | L359V only | 0.78 | 0.72 | 0.92 | 0.89 | 5.58E-02 | 1.17E-02 | 8.64E-01 | 9.32E-01 |
| 8081853 | NM_152305    | KTELC1    | KTEL (Lys-Tyr-Glu-Leu) containing 1                                                | L359V only | 0.82 | 0.72 | 0.89 | 0.91 | 1.07E-01 | 9.08E-03 | 8.09E-01 | 1.00E+00 |
| 8168416 | BC072683     | USMG5     | up-regulated during skeletal muscle growth 5 homolog (mouse)                       | L359V only | 0.88 | 0.72 | 0.90 | 0.89 | 5.25E-01 | 4.65E-02 | 8.82E-01 | 1.00E+00 |
| 7933933 | NM_021800    | DNAJC12   | DnaJ (Hsp40) homolog, subfamily C, member 12                                       | L359V only | 0.79 | 0.72 | 0.92 | 0.90 | 1.85E-01 | 4.33E-02 | 9.01E-01 | 1.00E+00 |
| 8096296 | AY956764     | HSP90AB3P | heat shock protein 90kDa alpha (cytosolic), class B member 3 (pseudogene)          | L359V only | 1.00 | 0.72 | 0.95 | 0.99 | 9.92E-01 | 7.96E-03 | 9.02E-01 | 1.00E+00 |
| 8003068 | NM_005792    | MPHOSPH6  | M-phase phosphoprotein 6                                                           | L359V only | 0.97 | 0.72 | 0.90 | 0.94 | 9.02E-01 | 1.45E-02 | 8.41E-01 | 1.00E+00 |
| 7981290 | NM_004184    | WARS      | tryptophanyl-tRNA synthetase                                                       | L359V only | 0.85 | 0.72 | 1.06 | 0.98 | 2.81E-01 | 2.05E-02 | 9.13E-01 | 1.00E+00 |
| 8075529 | NM_014338    | PISD      | phosphatidylserine decarboxylase                                                   | L359V only | 0.80 | 0.72 | 0.91 | 0.86 | 6.87E-02 | 7.85E-03 | 8.36E-01 | 6.34E-01 |
| 7953594 | NM_006331    | EMG1      | EMG1 nucleolar protein homolog ( <i>S. cerevisiae</i> )                            | L359V only | 0.86 | 0.72 | 0.86 | 0.88 | 2.78E-01 | 1.25E-02 | 7.50E-01 | 9.02E-01 |
| 8009366 | NM_015462    | NOL11     | nucleolar protein 11                                                               | L359V only | 0.90 | 0.72 | 0.92 | 0.93 | 4.92E-01 | 1.35E-02 | 8.77E-01 | 1.00E+00 |
| 8148476 | NM_014957    | DENND3    | DENN                                                                               | L359V only | 0.77 | 0.72 | 0.98 | 0.92 | 6.52E-02 | 1.51E-02 | 9.72E-01 | 1.00E+00 |
| 7908766 | NM_006335    | TIMM17A   | translocase of inner mitochondrial membrane 17 homolog A (yeast)                   | L359V only | 0.82 | 0.72 | 0.85 | 0.84 | 2.37E-01 | 3.59E-02 | 8.03E-01 | 8.01E-01 |
| 7959294 | NM_032790    | ORAI1     | ORAI calcium release-activated calcium modulator 1                                 | L359V only | 0.73 | 0.72 | 0.88 | 0.81 | 5.67E-02 | 3.46E-02 | 8.38E-01 | 6.07E-01 |
| 8157582 | NM_000177    | GSN       | gelsolin (amyloidosis, Finnish type)                                               | L359V only | 0.80 | 0.72 | 0.82 | 0.85 | 1.49E-01 | 2.26E-02 | 6.76E-01 | 8.13E-01 |
| 7918284 | NM_005645    | TAF13     | TAF13 RNA polymerase II, TATA box binding protein (TBP)-associated factor, 18kD    | L359V only | 0.98 | 0.72 | 0.93 | 0.87 | 9.44E-01 | 4.67E-02 | 9.25E-01 | 1.00E+00 |
| 8056753 | NM_024770    | METT18    | methyltransferase like 8                                                           | L359V only | 0.86 | 0.72 | 0.86 | 0.88 | 2.52E-01 | 9.28E-03 | 7.23E-01 | 8.36E-01 |
| 8044965 | NM_004622    | TSN       | translin                                                                           | L359V only | 0.79 | 0.72 | 0.92 | 0.91 | 1.08E-01 | 1.71E-02 | 8.76E-01 | 1.00E+00 |
| 8078405 | NM_138410    | CMTM7     | CKLF-like MARVEL transmembrane domain containing 7                                 | L359V only | 0.81 | 0.72 | 0.99 | 0.87 | 1.30E-01 | 1.42E-02 | 9.86E-01 | 8.84E-01 |
| 8060839 | NM_019095    | CRLS1     | cardiolipin synthase 1                                                             | L359V only | 0.84 | 0.72 | 0.92 | 0.89 | 3.28E-01 | 3.29E-02 | 8.89E-01 | 1.00E+00 |
| 8109802 | NM_002887    | RARS      | arginyl-tRNA synthetase                                                            | L359V only | 0.82 | 0.72 | 0.83 | 0.86 | 1.35E-01 | 1.16E-02 | 5.96E-01 | 7.16E-01 |
| 7950683 | NM_024678    | NARS2     | asparaginyl-tRNA synthetase 2, mitochondrial (putative)                            | L359V only | 0.84 | 0.72 | 0.91 | 0.93 | 3.12E-01 | 3.29E-02 | 8.86E-01 | 1.00E+00 |
| 7995258 | NM_003414    | ZNF267    | zinc finger protein 267                                                            | L359V only | 0.90 | 0.72 | 0.87 | 0.90 | 5.53E-01 | 2.85E-02 | 8.20E-01 | 1.00E+00 |
| 8169868 | NM_006649    | UTP14A    | UTP14, U3 small nucleolar ribonucleoprotein, homolog A (yeast)                     | L359V only | 0.82 | 0.72 | 0.89 | 0.90 | 1.00E-01 | 7.21E-03 | 8.06E-01 | 9.62E-01 |
| 7944656 | NM_006918    | SC5DL     | sterol-C5-desaturase (ERG3 delta-5-desaturase homolog, <i>S. cerevisiae</i> )-like | L359V only | 0.98 | 0.72 | 0.97 | 0.91 | 9.40E-01 | 2.08E-02 | 9.59E-01 | 1.00E+00 |
| 7900201 | NM_016037    | UTP11L    | UTP11-like, U3 small nucleolar ribonucleoprotein, (yeast)                          | L359V only | 0.83 | 0.72 | 0.91 | 0.91 | 9.95E-02 | 4.42E-03 | 8.20E-01 | 1.00E+00 |
| 8141150 | NM_133436    | ASNS      | asparagine synthetase                                                              | L359V only | 0.82 | 0.72 | 0.99 | 1.01 | 2.52E-01 | 3.32E-02 | 9.94E-01 | 1.00E+00 |
| 8157283 | NM_004697    | PRPF4     | PRP4 pre-mRNA processing factor 4 homolog (yeast)                                  | L359V only | 0.78 | 0.71 | 0.90 | 0.89 | 8.91E-02 | 2.06E-02 | 8.64E-01 | 1.00E+00 |
| 8084982 | NR_024388    | LOC152217 | hypothetical LOC152217                                                             | L359V only | 0.89 | 0.71 | 0.94 | 0.91 | 3.94E-01 | 8.26E-03 | 8.98E-01 | 1.00E+00 |
| 8049317 | NM_152879    | DGKD      | diacylglycerol kinase, delta 130kDa                                                | L359V only | 0.84 | 0.71 | 0.92 | 0.90 | 1.98E-01 | 1.07E-02 | 8.75E-01 | 1.00E+00 |
| 8131860 | BC012331     | C7orf30   | chromosome 7 open reading frame 30                                                 | L359V only | 0.79 | 0.71 | 0.86 | 0.86 | 1.39E-01 | 2.94E-02 | 8.09E-01 | 9.58E-01 |
| 7935730 | NM_018294    | CWF19L1   | CWF19-like 1, cell cycle control ( <i>S. pombe</i> )                               | L359V only | 0.81 | 0.71 | 0.87 | 0.87 | 1.63E-01 | 2.01E-02 | 8.19E-01 | 9.13E-01 |
| 8125919 | NM_004117    | FKBP5     | FK506 binding protein 5                                                            | L359V only | 0.82 | 0.71 | 0.87 | 0.85 | 1.85E-01 | 2.16E-02 | 8.23E-01 | 8.38E-01 |
| 8126153 | NM_003740    | KCNK5     | potassium channel, subfamily K, member 5                                           | L359V only | 0.79 | 0.71 | 0.84 | 0.85 | 1.04E-01 | 1.65E-02 | 7.28E-01 | 7.48E-01 |
| 8086201 | NM_001607    | ACAA1     | acetyl-Coenzyme A acyltransferase 1                                                | L359V only | 0.93 | 0.71 | 0.86 | 0.89 | 6.65E-01 | 1.52E-02 | 8.01E-01 | 1.00E+00 |
| 8080419 | NM_206825    | GNL3      | guanine nucleotide binding protein-like 3 (nucleolar)                              | L359V only | 0.79 | 0.71 | 0.87 | 0.88 | 1.32E-01 | 1.45E-02 | 8.16E-01 | 1.00E+00 |
| 8146717 | NM_013257    | SGK3      | serum                                                                              | L359V only | 0.79 | 0.71 | 0.85 | 0.85 | 1.00E-01 | 1.51E-02 | 7.68E-01 | 6.95E-01 |
| 8150364 | NM_031940    | TM2D2     | TM2 domain containing 2                                                            | L359V only | 0.82 | 0.71 | 0.87 | 0.84 | 2.67E-01 | 3.41E-02 | 8.34E-01 | 8.60E-01 |
| 7936091 | NM_032747    | USMG5     | up-regulated during skeletal muscle growth 5 homolog (mouse)                       | L359V only | 0.76 | 0.71 | 0.89 | 0.83 | 5.43E-02 | 1.40E-02 | 8.25E-01 | 5.96E-01 |
| 8066117 | NM_015474    | SAMHD1    | SAM domain and HD domain 1                                                         | L359V only | 0.82 | 0.71 | 0.74 | 0.84 | 1.79E-01 | 1.82E-02 | 2.51E-01 | 6.61E-01 |
| 8150592 | NM_005195    | CEBPD     | CCAAT                                                                              | L359V only | 0.74 | 0.71 | 0.82 | 0.86 | 7.86E-02 | 3.25E-02 | 7.49E-01 | 9.78E-01 |
| 8140420 | NR_003262    | FDPDSL2A  | MGC44478                                                                           | L359V only | 0.89 | 0.71 | 1.02 | 0.92 | 4.38E-01 | 9.62E-03 | 9.81E-01 | 1.00E+00 |
| 8119661 | BC011933     | C6orf153  | chromosome 6 open reading frame 153                                                | L359V only | 0.86 | 0.71 | 0.88 | 0.87 | 3.63E-01 | 2.26E-02 | 8.34E-01 | 9.59E-01 |
| 8175924 | NM_003491    | ARD1A     | ARD1 homolog A, N-acetyltransferase ( <i>S. cerevisiae</i> )                       | L359V only | 0.82 | 0.71 | 0.92 | 0.84 | 1.22E-01 | 8.99E-03 | 8.73E-01 | 5.52E-01 |
| 8001876 | NM_001018159 | NAE1      | NEDD8 activating enzyme E1 subunit 1                                               | L359V only | 0.81 | 0.71 | 0.88 | 0.94 | 1.46E-01 | 1.79E-02 | 8.34E-01 | 1.00E+00 |
| 7900922 | NM_004047    | ATP6V0B   | ATPase, H+ transporting, lysosomal 21kDa, V0 subunit b                             | L359V only | 0.75 | 0.71 | 0.93 | 0.84 | 7.27E-02 | 2.47E-02 | 9.09E-01 | 7.46E-01 |
| 8144669 | NM_004462    | FDFT1     | farnesyl-diphosphate farnesyltransferase 1                                         | L359V only | 0.87 | 0.71 | 1.00 | 0.91 | 2.19E-01 | 4.39E-03 | 9.97E-01 | 9.88E-01 |
| 8018082 | NM_139177    | SLC39A11  | solute carrier family 39 (metal ion transporter), member 11                        | L359V only | 1.00 | 0.71 | 0.99 | 0.91 | 9.97E-01 | 2.17E-02 | 9.90E-01 | 1.00E+00 |
| 8173755 | NM_004867    | ITM2A     | integral membrane protein 2A                                                       | L359V only | 1.07 | 0.71 | 1.12 | 0.96 | 7.38E-01 | 2.64E-02 | 8.53E-01 | 1.00E+00 |
| 7958375 | ---          | ---       | ---                                                                                | L359V only | 0.86 | 0.71 | 0.91 | 0.92 | 3.58E-01 | 2.30E-02 | 8.77E-01 | 1.00E+00 |
| 8085660 | NM_206831    | DPH3      | DPH3, KTI11 homolog ( <i>S. cerevisiae</i> )                                       | L359V only | 0.84 | 0.71 | 0.90 | 0.87 | 2.35E-01 | 1.34E-02 | 8.52E-01 | 8.96E-01 |
| 8035905 | NM_032139    | ANKRD27   | ankyrin repeat domain 27 (VPS9 domain)                                             | L359V only | 0.98 | 0.71 | 1.04 | 0.95 | 9.13E-01 | 9.05E-03 | 9.52E-01 | 1.00E+00 |
| 8114778 | NM_004483    | GCSH      | glycine cleavage system protein H (aminomethyl carrier)                            | L359V only | 0.87 | 0.71 | 0.97 | 0.95 | 3.35E-01 | 1.19E-02 | 9.67E-01 | 1.00E+00 |
| 8140443 | NR_003262    | FDPDSL2A  | MGC44478                                                                           | L359V only | 0.90 | 0.71 | 0.98 | 0.91 | 5.14E-01 | 1.34E-02 | 9.80E-01 | 1.00E+00 |
| 8026915 | NM_015683    | ARRDC2    | arrestin domain containing 2                                                       | L359V only | 0.88 | 0.71 | 0.94 | 0.86 | 5.22E-01 | 3.43E-02 | 9.31E-01 | 1.00E+00 |
| 8074399 | NM_007098    | CLTCL1    | clathrin, heavy chain-like 1                                                       | L359V only | 0.76 | 0.70 | 0.89 | 0.86 | 6.78E-02 | 1.72E-02 | 8.38E-01 | 8.90E-01 |
| 7938890 | NM_005788    | PRMT3     | protein arginine methyltransferase 3                                               | L359V only | 0.86 | 0.70 | 0.91 | 0.93 | 2.73E-01 | 9.01E-03 | 8.60E-01 | 1.00E+00 |
| 8098195 | NM_006745    | SC4MOL    | sterol-C4-methyl oxidase-like                                                      | L359V only | 0.88 | 0.70 | 1.01 | 0.91 | 5.11E-01 | 3.71E-02 | 9.94E-01 | 1.00E+00 |
| 8092265 | NM_020409    | MRPL47    | mitochondrial ribosomal protein L47                                                | L359V only | 0.81 | 0.70 | 0.92 | 0.91 | 1.77E-01 | 2.10E-02 | 8.86E-01 | 1.00E+00 |
| 8130732 | NM_016098    | BRP44L    | brain protein 44-like                                                              | L359V only | 0.78 | 0.70 | 0.84 | 0.85 | 7.09E-02 | 9.86E-03 | 6.82E-01 | 7.09E-01 |
| 8044278 | NM_144978    | CCDC138   | coiled-coil domain containing 138                                                  | L359V only | 0.91 | 0.70 | 0.90 | 0.92 | 6.67E-01 | 3.04E-02 | 8.78E-01 | 1.00E+00 |
| 8046604 | NM_003659    | AGPS      | alkylglycerone phosphate synthase                                                  | L359V only | 0.96 | 0.70 | 0.87 | 0.93 | 8.21E-01 | 4.31E-03 | 7.33E-01 | 1.00E+00 |



|         |              |              |                                                                                        |            |      |      |      |      |          |          |          |          |
|---------|--------------|--------------|----------------------------------------------------------------------------------------|------------|------|------|------|------|----------|----------|----------|----------|
| 8017437 | NM_017647    | FTSJ3        | FtsJ homolog 3 (E. coli)                                                               | L359V only | 0.76 | 0.70 | 0.85 | 0.85 | 9.36E-02 | 2.60E-02 | 8.09E-01 | 8.99E-01 |
| 8099073 | NM_002337    | LRPAP1       | low density lipoprotein receptor-related protein associated protein 1                  | L359V only | 0.80 | 0.70 | 0.95 | 0.91 | 9.82E-02 | 1.10E-02 | 9.34E-01 | 1.00E+00 |
| 8085665 | NM_015150    | RFTN1        | raftlin, lipid raft linker 1                                                           | L359V only | 0.84 | 0.70 | 0.98 | 0.92 | 3.20E-01 | 2.64E-02 | 9.81E-01 | 1.00E+00 |
| 7922343 | NM_003326    | TNFSF4       | tumor necrosis factor (ligand) superfamily, member 4                                   | L359V only | 0.82 | 0.70 | 1.01 | 0.85 | 3.10E-01 | 4.75E-02 | 9.90E-01 | 1.00E+00 |
| 7940717 | NM_001012661 | SLC3A2       | solute carrier family 3 (activators of dibasic and neutral amino acid transport), memb | L359V only | 0.88 | 0.70 | 1.09 | 0.98 | 4.70E-01 | 2.56E-02 | 8.90E-01 | 1.00E+00 |
| 8031825 | U71363       | ZNF587       | zinc finger protein 587                                                                | L359V only | 0.77 | 0.70 | 1.01 | 0.91 | 1.47E-01 | 4.13E-02 | 9.91E-01 | 1.00E+00 |
| 8020411 | NM_006938    | SNRPD1       | small nuclear ribonucleoprotein D1 polypeptide 16kDa                                   | L359V only | 0.80 | 0.70 | 0.82 | 0.87 | 1.64E-01 | 2.05E-02 | 7.17E-01 | 9.47E-01 |
| 7923978 | NM_001773    | CD34         | CD34 molecule                                                                          | L359V only | 0.86 | 0.70 | 1.13 | 0.90 | 3.27E-01 | 1.23E-02 | 8.23E-01 | 1.00E+00 |
| 7939376 | NM_174902    | LDLRAD3      | low density lipoprotein receptor class A domain containing 3                           | L359V only | 0.90 | 0.70 | 0.88 | 0.85 | 4.87E-01 | 1.13E-02 | 8.14E-01 | 7.42E-01 |
| 8029521 | NM_001128917 | TOMM40       | translocase of outer mitochondrial membrane 40 homolog (yeast)                         | L359V only | 0.73 | 0.70 | 0.87 | 0.83 | 5.16E-02 | 2.05E-02 | 8.23E-01 | 7.09E-01 |
| 8080184 | NM_000688    | ALAS1        | aminolevulinatase, delta-, synthase 1                                                  | L359V only | 0.80 | 0.70 | 0.99 | 0.89 | 1.84E-01 | 2.37E-02 | 9.92E-01 | 1.00E+00 |
| 8110920 | NM_024091    | FASTKD3      | FAST kinase domains 3                                                                  | L359V only | 0.86 | 0.70 | 0.89 | 0.88 | 1.94E-01 | 4.26E-03 | 8.01E-01 | 7.60E-01 |
| 8169603 | NM_001031855 | LONRF3       | LON peptidase N-terminal domain and ring finger 3                                      | L359V only | 0.83 | 0.70 | 1.10 | 0.95 | 1.81E-01 | 9.90E-03 | 8.54E-01 | 1.00E+00 |
| 8078173 | NM_138381    | OXNAD1       | oxidoreductase NAD-binding domain containing 1                                         | L359V only | 0.81 | 0.70 | 0.83 | 0.88 | 1.08E-01 | 8.88E-03 | 6.04E-01 | 8.98E-01 |
| 7932160 | BC072452     | FAM107B      | family with sequence similarity 107, member B                                          | L359V only | 0.82 | 0.70 | 0.98 | 0.96 | 1.84E-01 | 1.47E-02 | 9.81E-01 | 1.00E+00 |
| 8042588 | NM_005791    | MPHOSPH10    | M-phase phosphoprotein 10 (U3 small nucleolar ribonucleoprotein)                       | L359V only | 0.86 | 0.70 | 0.82 | 0.87 | 4.56E-01 | 3.84E-02 | 7.79E-01 | 1.00E+00 |
| 7938592 | NM_032228    | FAR1         | fatty acyl CoA reductase 1                                                             | L359V only | 0.84 | 0.70 | 0.91 | 0.91 | 1.18E-01 | 3.65E-03 | 8.36E-01 | 1.00E+00 |
| 8075182 | NM_005080    | XBP1         | X-box binding protein 1                                                                | L359V only | 0.90 | 0.70 | 1.02 | 0.94 | 4.26E-01 | 6.74E-03 | 9.81E-01 | 1.00E+00 |
| 8089988 | NM_001017928 | CCDC58       | coiled-coil domain containing 58                                                       | L359V only | 0.83 | 0.70 | 0.95 | 0.93 | 2.51E-01 | 2.21E-02 | 9.42E-01 | 1.00E+00 |
| 7910014 | NM_014184    | CNIH4        | cornichon homolog 4 (Drosophila)                                                       | L359V only | 0.76 | 0.70 | 1.20 | 0.95 | 6.03E-02 | 1.29E-02 | 7.20E-01 | 1.00E+00 |
| 7937735 | NM_002339    | LSP1         | lymphocyte-specific protein 1                                                          | L359V only | 0.76 | 0.70 | 0.87 | 0.82 | 5.49E-02 | 1.25E-02 | 8.14E-01 | 5.55E-01 |
| 8047223 | NM_002157    | HSPE1        | heat shock 10kDa protein 1 (chaperonin 10)                                             | L359V only | 0.75 | 0.70 | 0.87 | 0.83 | 7.09E-02 | 1.96E-02 | 8.25E-01 | 6.73E-01 |
| 7954591 | NM_021821    | MRPS35       | mitochondrial ribosomal protein S35                                                    | L359V only | 0.85 | 0.70 | 0.91 | 0.93 | 2.07E-01 | 7.15E-03 | 8.55E-01 | 1.00E+00 |
| 8112220 | NM_001104631 | PDE4D        | phosphodiesterase 4D, cAMP-specific (phosphodiesterase E3 dunce homolog, Dros          | L359V only | 0.84 | 0.70 | 0.95 | 0.90 | 3.70E-01 | 4.08E-02 | 9.52E-01 | 1.00E+00 |
| 8005839 | NM_014573    | TMEM97       | transmembrane protein 97                                                               | L359V only | 0.80 | 0.70 | 0.93 | 0.87 | 1.82E-01 | 2.23E-02 | 9.12E-01 | 1.00E+00 |
| 8171879 | XM_942610    | LOC389842    | similar to RanBP1                                                                      | L359V only | 0.85 | 0.70 | 0.92 | 0.90 | 2.58E-01 | 9.85E-03 | 8.80E-01 | 1.00E+00 |
| 8121489 | NM_001634    | AMD1         | adenosylmethionine decarboxylase 1                                                     | L359V only | 0.86 | 0.70 | 0.94 | 0.91 | 2.55E-01 | 7.80E-03 | 9.07E-01 | 1.00E+00 |
| 8139203 | NM_138701    | C7orf11      | chromosome 7 open reading frame 11                                                     | L359V only | 0.94 | 0.70 | 0.96 | 0.95 | 7.83E-01 | 2.02E-02 | 9.53E-01 | 1.00E+00 |
| 7965200 | NM_014167    | CCDC59       | coiled-coil domain containing 59                                                       | L359V only | 1.00 | 0.70 | 0.94 | 0.99 | 9.92E-01 | 2.94E-02 | 9.34E-01 | 1.00E+00 |
| 7936641 | NM_213649    | SFXN4        | sideroflexin 4                                                                         | L359V only | 0.83 | 0.70 | 0.96 | 0.92 | 9.08E-02 | 3.28E-03 | 9.36E-01 | 1.00E+00 |
| 8135638 | NM_018412    | ST7          | suppression of tumorigenicity 7                                                        | L359V only | 1.09 | 0.69 | 1.05 | 0.96 | 6.81E-01 | 2.85E-02 | 9.43E-01 | 1.00E+00 |
| 8071069 | NM_014339    | IL17RA       | interleukin 17 receptor A                                                              | L359V only | 0.80 | 0.69 | 0.89 | 0.85 | 5.15E-02 | 3.53E-03 | 8.06E-01 | 5.23E-01 |
| 7953697 | ---          | ---          | ---                                                                                    | L359V only | 0.86 | 0.69 | 0.90 | 0.96 | 4.55E-01 | 2.85E-02 | 8.81E-01 | 1.00E+00 |
| 7907859 | XR_038100    | LOC100130511 | hypothetical LOC100130511                                                              | L359V only | 0.91 | 0.69 | 0.90 | 0.95 | 7.00E-01 | 3.47E-02 | 8.81E-01 | 1.00E+00 |
| 8103011 | NM_199324    | OTUD4        | OTU domain containing 4                                                                | L359V only | 0.98 | 0.69 | 0.94 | 0.95 | 9.23E-01 | 5.91E-03 | 8.89E-01 | 1.00E+00 |
| 8000323 | NM_005003    | NDUFAB1      | NADH dehydrogenase (ubiquinone) 1, alpha                                               | L359V only | 0.80 | 0.69 | 0.88 | 0.85 | 1.28E-01 | 9.98E-03 | 8.23E-01 | 7.16E-01 |
| 7948904 | NR_002562    | SNORD28      | small nucleolar RNA, C                                                                 | L359V only | 1.03 | 0.69 | 1.02 | 1.04 | 9.19E-01 | 1.56E-02 | 9.83E-01 | 1.00E+00 |
| 7928471 | NM_006721    | ADK          | adenosine kinase                                                                       | L359V only | 0.92 | 0.69 | 0.90 | 0.92 | 4.76E-01 | 2.15E-03 | 7.99E-01 | 1.00E+00 |
| 7987027 | NR_024074    | GOLGA9P      | golgi autoantigen, golgin subfamily a, 9 pseudogene                                    | L359V only | 0.80 | 0.69 | 0.85 | 0.86 | 9.52E-02 | 7.47E-03 | 7.28E-01 | 7.33E-01 |
| 8110392 | NM_017510    | TMED9        | transmembrane emp24 protein transport domain containing 9                              | L359V only | 0.96 | 0.69 | 0.96 | 0.89 | 8.28E-01 | 8.27E-03 | 9.52E-01 | 9.89E-01 |
| 7915015 | NM_013285    | GNL2         | guanine nucleotide binding protein-like 2 (nucleolar)                                  | L359V only | 0.80 | 0.69 | 0.90 | 0.89 | 1.72E-01 | 1.75E-02 | 8.68E-01 | 1.00E+00 |
| 8088895 | NR_024241    | FAM86D       | family with sequence similarity 86, member D                                           | L359V only | 0.81 | 0.69 | 0.91 | 0.85 | 1.65E-01 | 1.17E-02 | 8.64E-01 | 7.85E-01 |
| 8076455 | NM_015703    | RRP7A        | ribosomal RNA processing 7 homolog A (S. cerevisiae)                                   | L359V only | 0.79 | 0.69 | 0.80 | 0.85 | 1.08E-01 | 1.10E-02 | 5.21E-01 | 7.38E-01 |
| 8082003 | NM_018456    | EAF2         | ELL associated factor 2                                                                | L359V only | 0.73 | 0.69 | 0.94 | 0.87 | 9.47E-02 | 3.94E-02 | 9.36E-01 | 1.00E+00 |
| 8005953 | NR_000010    | SNORD4A      | small nucleolar RNA, C                                                                 | L359V only | 0.80 | 0.69 | 0.87 | 0.89 | 5.40E-02 | 3.64E-03 | 7.33E-01 | 9.07E-01 |
| 8057554 | AF057356     | CACYBP       | calyculin binding protein                                                              | L359V only | 0.91 | 0.69 | 0.87 | 0.92 | 4.50E-01 | 3.02E-03 | 7.35E-01 | 1.00E+00 |
| 8063386 | NM_005194    | CEBPB        | CCAAT                                                                                  | L359V only | 1.07 | 0.69 | 1.02 | 0.91 | 7.35E-01 | 1.48E-02 | 9.82E-01 | 1.00E+00 |
| 8170590 | NM_015922    | NSDHL        | NAD(P) dependent steroid dehydrogenase-like                                            | L359V only | 0.84 | 0.69 | 0.97 | 0.84 | 1.29E-01 | 2.61E-03 | 9.52E-01 | 4.11E-01 |
| 8089040 | NM_001042533 | MINA         | MYC induced nuclear antigen                                                            | L359V only | 0.77 | 0.69 | 0.91 | 0.88 | 1.98E-01 | 4.41E-02 | 8.98E-01 | 1.00E+00 |
| 8013015 | NM_181716    | CENPV        | centromere protein V                                                                   | L359V only | 0.82 | 0.69 | 0.94 | 0.90 | 1.98E-01 | 1.32E-02 | 9.22E-01 | 1.00E+00 |
| 8022488 | NM_138340    | ABHD3        | abhydrolase domain containing 3                                                        | L359V only | 0.82 | 0.69 | 0.83 | 0.84 | 3.11E-01 | 3.14E-02 | 8.03E-01 | 9.26E-01 |
| 8061668 | NM_002110    | HCK          | hemopoietic cell kinase                                                                | L359V only | 0.78 | 0.69 | 0.92 | 0.87 | 2.28E-01 | 4.91E-02 | 9.15E-01 | 1.00E+00 |
| 8101099 | NM_018115    | SDAD1        | SDA1 domain containing 1                                                               | L359V only | 0.81 | 0.69 | 0.93 | 0.91 | 9.61E-02 | 5.39E-03 | 8.81E-01 | 1.00E+00 |
| 8008627 | NM_005450    | NOG          | noggin                                                                                 | L359V only | 0.76 | 0.69 | 1.05 | 0.88 | 8.65E-02 | 1.71E-02 | 9.40E-01 | 1.00E+00 |
| 8159854 | NM_014878    | KIAA0020     | KIAA0020                                                                               | L359V only | 0.89 | 0.69 | 0.94 | 0.90 | 3.72E-01 | 4.53E-03 | 8.86E-01 | 1.00E+00 |
| 8052932 | ---          | ---          | ---                                                                                    | L359V only | 0.75 | 0.68 | 1.04 | 0.82 | 1.22E-01 | 3.24E-02 | 9.65E-01 | 8.38E-01 |
| 8017143 | NM_016077    | PTRH2        | peptidyl-tRNA hydrolase 2                                                              | L359V only | 0.80 | 0.68 | 0.90 | 0.88 | 2.24E-01 | 2.90E-02 | 8.85E-01 | 1.00E+00 |
| 8083656 | NM_022736    | MFS1         | major facilitator superfamily domain containing 1                                      | L359V only | 0.80 | 0.68 | 0.98 | 0.91 | 7.60E-02 | 4.94E-03 | 9.71E-01 | 1.00E+00 |
| 8119974 | NM_001078175 | SLC29A1      | solute carrier family 29 (nucleoside transporters), member 1                           | L359V only | 0.80 | 0.68 | 0.95 | 0.85 | 7.57E-02 | 4.91E-03 | 9.13E-01 | 6.34E-01 |
| 8169984 | NM_000194    | HPRT1        | hypoxanthine phosphoribosyltransferase 1                                               | L359V only | 0.86 | 0.68 | 0.91 | 0.90 | 3.39E-01 | 1.32E-02 | 8.76E-01 | 1.00E+00 |
| 7935692 | NM_001100626 | ERLIN1       | ER lipid raft associated 1                                                             | L359V only | 0.81 | 0.68 | 0.92 | 0.92 | 1.22E-01 | 6.23E-03 | 8.79E-01 | 1.00E+00 |
| 7965918 | NM_016575    | NT5DC3       | 5'-nucleotidase domain containing 3                                                    | L359V only | 0.76 | 0.68 | 0.86 | 0.87 | 8.93E-02 | 1.68E-02 | 8.23E-01 | 9.89E-01 |
| 8069332 | NR_002776    | MCM3APAS     | MCM3AP antisense RNA (non-protein coding)                                              | L359V only | 0.80 | 0.68 | 0.89 | 0.89 | 1.96E-01 | 2.04E-02 | 8.63E-01 | 1.00E+00 |
| 7916570 | NM_145243    | OMA1         | OMA1 homolog, zinc metallopeptidase (S. cerevisiae)                                    | L359V only | 1.04 | 0.68 | 0.96 | 0.95 | 8.08E-01 | 3.16E-03 | 9.24E-01 | 1.00E+00 |
| 7958211 | NM_152318    | C12orf45     | chromosome 12 open reading frame 45                                                    | L359V only | 0.78 | 0.68 | 0.86 | 0.89 | 1.45E-01 | 2.23E-02 | 8.25E-01 | 1.00E+00 |

|         |              |             |                                                                                |            |      |      |      |      |          |          |          |          |
|---------|--------------|-------------|--------------------------------------------------------------------------------|------------|------|------|------|------|----------|----------|----------|----------|
| 8082133 | NM_006810    | PDIA5       | protein disulfide isomerase family A, member 5                                 | L359V only | 0.98 | 0.68 | 1.01 | 0.96 | 9.27E-01 | 9.85E-03 | 9.88E-01 | 1.00E+00 |
| 8162744 | NM_003389    | CORO2A      | coronin, actin binding protein, 2A                                             | L359V only | 1.04 | 0.68 | 1.15 | 0.93 | 7.97E-01 | 3.68E-03 | 7.52E-01 | 1.00E+00 |
| 8123819 | NM_004280    | EEF1E1      | eukaryotic translation elongation factor 1 epsilon 1                           | L359V only | 0.82 | 0.68 | 0.91 | 0.89 | 1.74E-01 | 9.23E-03 | 8.70E-01 | 1.00E+00 |
| 8047815 | NM_001136194 | FASTKD2     | FAST kinase domains 2                                                          | L359V only | 0.80 | 0.68 | 0.81 | 0.83 | 1.01E-01 | 7.45E-03 | 5.02E-01 | 6.04E-01 |
| 8011245 | NM_018128    | TSR1        | TSR1, 20S rRNA accumulation, homolog (S. cerevisiae)                           | L359V only | 0.72 | 0.68 | 0.85 | 0.85 | 5.73E-02 | 1.93E-02 | 8.11E-01 | 9.23E-01 |
| 7967212 | NM_002150    | HPD         | 4-hydroxyphenylpyruvate dioxygenase                                            | L359V only | 0.69 | 0.68 | 0.84 | 0.79 | 5.15E-02 | 2.91E-02 | 8.14E-01 | 6.43E-01 |
| 8150217 | NR_003671    | hCG_1640171 | hCG1640171                                                                     | L359V only | 0.95 | 0.68 | 0.74 | 0.87 | 8.53E-01 | 3.53E-02 | 5.00E-01 | 1.00E+00 |
| 7982935 | ---          | ---         | ---                                                                            | L359V only | 0.90 | 0.68 | 0.97 | 0.88 | 6.18E-01 | 2.36E-02 | 9.76E-01 | 1.00E+00 |
| 8112807 | NM_000046    | ARSB        | arylsulfatase B                                                                | L359V only | 1.07 | 0.68 | 1.05 | 0.94 | 6.33E-01 | 2.40E-03 | 9.09E-01 | 1.00E+00 |
| 8131583 | NM_014038    | BZW2        | basic leucine zipper and W2 domains 2                                          | L359V only | 0.81 | 0.68 | 0.91 | 0.89 | 1.30E-01 | 7.29E-03 | 8.63E-01 | 1.00E+00 |
| 7934185 | NM_022153    | C10orf54    | chromosome 10 open reading frame 54                                            | L359V only | 0.74 | 0.68 | 0.93 | 0.83 | 5.05E-02 | 1.16E-02 | 9.09E-01 | 6.73E-01 |
| 8097011 | ---          | ---         | ---                                                                            | L359V only | 0.75 | 0.68 | 0.96 | 0.90 | 1.34E-01 | 3.29E-02 | 9.60E-01 | 1.00E+00 |
| 7977786 | NM_003982    | SLC7A7      | solute carrier family 7 (cationic amino acid transporter, y+ system), member 7 | L359V only | 1.11 | 0.68 | 1.05 | 0.94 | 6.45E-01 | 2.75E-02 | 9.49E-01 | 1.00E+00 |
| 8095894 | NM_020236    | MRPL1       | mitochondrial ribosomal protein L1                                             | L359V only | 0.74 | 0.68 | 0.76 | 0.81 | 5.23E-02 | 1.09E-02 | 3.29E-01 | 5.49E-01 |
| 7944530 | NM_178507    | OAF         | OAF homolog (Drosophila)                                                       | L359V only | 0.84 | 0.68 | 1.00 | 0.86 | 3.11E-01 | 1.64E-02 | 9.99E-01 | 9.56E-01 |
| 8014066 | NM_001003927 | EVI2A       | ecotropic viral integration site 2A                                            | L359V only | 0.75 | 0.68 | 0.97 | 0.95 | 1.08E-01 | 2.26E-02 | 9.70E-01 | 1.00E+00 |
| 7902104 | NM_002600    | PDE4B       | phosphodiesterase 4B, cAMP-specific (phosphodiesterase E4 dunce homolog, Dros  | L359V only | 0.79 | 0.67 | 0.94 | 0.87 | 1.44E-01 | 1.49E-02 | 9.27E-01 | 1.00E+00 |
| 7904967 | ---          | ---         | ---                                                                            | L359V only | 0.83 | 0.67 | 1.09 | 0.91 | 3.73E-01 | 2.98E-02 | 9.09E-01 | 1.00E+00 |
| 7945875 | NM_001099653 | FAM86C      | family with sequence similarity 86, member C                                   | L359V only | 0.75 | 0.67 | 0.93 | 0.85 | 1.04E-01 | 2.04E-02 | 9.16E-01 | 9.32E-01 |
| 7967456 | NM_145058    | RILPL2      | Rab interacting lysosomal protein-like 2                                       | L359V only | 0.81 | 0.67 | 0.88 | 0.88 | 2.76E-01 | 2.93E-02 | 8.66E-01 | 1.00E+00 |
| 8096109 | NM_016067    | MRPS18C     | mitochondrial ribosomal protein S18C                                           | L359V only | 1.02 | 0.67 | 0.85 | 0.93 | 9.39E-01 | 2.34E-02 | 8.23E-01 | 1.00E+00 |
| 8106820 | NM_006467    | POLR3G      | polymerase (RNA) III (DNA directed) polypeptide G (32kD)                       | L359V only | 0.92 | 0.67 | 0.97 | 0.91 | 6.17E-01 | 7.02E-03 | 9.67E-01 | 1.00E+00 |
| 8000236 | NM_001802    | CDR2        | cerebellar degeneration-related protein 2, 62kDa                               | L359V only | 1.01 | 0.67 | 0.99 | 0.94 | 9.42E-01 | 3.16E-03 | 9.94E-01 | 1.00E+00 |
| 8084794 | NM_002182    | IL1RAP      | interleukin 1 receptor accessory protein                                       | L359V only | 1.15 | 0.67 | 1.07 | 0.97 | 4.33E-01 | 1.48E-02 | 9.15E-01 | 1.00E+00 |
| 8100231 | NM_003215    | TEC         | tec protein tyrosine kinase                                                    | L359V only | 1.11 | 0.67 | 0.90 | 0.89 | 4.73E-01 | 3.67E-03 | 8.34E-01 | 9.45E-01 |
| 7909866 | NM_017898    | MOSC2       | MOCO sulphurase C-terminal domain containing 2                                 | L359V only | 0.71 | 0.67 | 0.79 | 0.90 | 1.18E-01 | 4.89E-02 | 7.66E-01 | 1.00E+00 |
| 8065855 | NM_018217    | EDEM2       | ER degradation enhancer, mannosidase alpha-like 2                              | L359V only | 0.83 | 0.67 | 0.96 | 0.87 | 2.68E-01 | 1.49E-02 | 9.56E-01 | 1.00E+00 |
| 8081953 | NM_005513    | GTF2E1      | general transcription factor IIE, polypeptide 1, alpha 56kDa                   | L359V only | 0.77 | 0.67 | 0.85 | 0.85 | 2.25E-01 | 4.75E-02 | 8.41E-01 | 1.00E+00 |
| 7931873 | NM_001494    | GDI2        | GDP dissociation inhibitor 2                                                   | L359V only | 0.93 | 0.67 | 0.96 | 0.92 | 6.85E-01 | 7.53E-03 | 9.43E-01 | 1.00E+00 |
| 7934553 | NM_032772    | ZNF503      | zinc finger protein 503                                                        | L359V only | 0.73 | 0.67 | 0.80 | 0.72 | 1.26E-01 | 3.88E-02 | 7.66E-01 | 3.63E-01 |
| 8081786 | NM_024638    | QTRTD1      | queuine tRNA-ribosyltransferase domain containing 1                            | L359V only | 0.80 | 0.67 | 0.91 | 0.86 | 1.35E-01 | 8.43E-03 | 8.76E-01 | 8.60E-01 |
| 7943984 | NM_006006    | ZBTB16      | zinc finger and BTB domain containing 16                                       | L359V only | 0.91 | 0.67 | 1.13 | 0.93 | 6.96E-01 | 2.52E-02 | 8.70E-01 | 1.00E+00 |
| 7951036 | NR_003033    | SNORD5      | small nucleolar RNA, C                                                         | L359V only | 0.83 | 0.67 | 1.01 | 0.93 | 3.64E-01 | 3.32E-02 | 9.90E-01 | 1.00E+00 |
| 8149296 | NM_017884    | PINX1       | PIN2-interacting protein 1                                                     | L359V only | 0.74 | 0.67 | 0.83 | 0.85 | 9.34E-02 | 2.33E-02 | 8.05E-01 | 9.78E-01 |
| 8042391 | NM_002664    | PLEK        | pleckstrin                                                                     | L359V only | 1.09 | 0.67 | 1.16 | 1.06 | 6.23E-01 | 5.91E-03 | 7.77E-01 | 1.00E+00 |
| 8048703 | XM_938653    | LOC646644   | similar to Chromosome 12 open reading frame 31                                 | L359V only | 0.89 | 0.67 | 1.02 | 0.91 | 4.31E-01 | 4.23E-03 | 9.74E-01 | 1.00E+00 |
| 7922104 | NM_004483    | GCSH        | glycine cleavage system protein H (aminomethyl carrier)                        | L359V only | 0.84 | 0.67 | 0.99 | 0.93 | 2.23E-01 | 7.08E-03 | 9.84E-01 | 1.00E+00 |
| 7950983 | NM_012124    | CHORDC1     | cysteine and histidine-rich domain (CHORD)-containing 1                        | L359V only | 0.89 | 0.67 | 0.88 | 0.84 | 5.69E-01 | 1.93E-02 | 8.42E-01 | 8.90E-01 |
| 7961891 | NM_030762    | BHLHE41     | basic helix-loop-helix family, member e41                                      | L359V only | 0.74 | 0.67 | 0.99 | 0.85 | 1.22E-01 | 2.92E-02 | 9.93E-01 | 1.00E+00 |
| 8046003 | NM_012198    | GCA         | grancalcin, EF-hand calcium binding protein                                    | L359V only | 0.91 | 0.67 | 0.86 | 0.90 | 5.61E-01 | 5.62E-03 | 7.92E-01 | 1.00E+00 |
| 8168644 | ---          | ---         | ---                                                                            | L359V only | 0.78 | 0.67 | 0.87 | 0.87 | 1.40E-01 | 1.42E-02 | 8.33E-01 | 1.00E+00 |
| 8159337 | NM_015160    | PMPCA       | peptidase (mitochondrial processing) alpha                                     | L359V only | 0.81 | 0.67 | 0.80 | 0.84 | 1.71E-01 | 8.59E-03 | 5.45E-01 | 7.44E-01 |
| 8002999 | NM_004483    | GCSH        | glycine cleavage system protein H (aminomethyl carrier)                        | L359V only | 0.84 | 0.67 | 0.99 | 0.93 | 2.52E-01 | 7.51E-03 | 9.91E-01 | 1.00E+00 |
| 8092596 | NM_001346    | DGKG        | diacylglycerol kinase, gamma 90kDa                                             | L359V only | 0.74 | 0.67 | 0.95 | 0.85 | 6.78E-02 | 1.32E-02 | 9.36E-01 | 8.84E-01 |
| 8128383 | NM_017421    | COQ3        | coenzyme Q3 homolog, methyltransferase (S. cerevisiae)                         | L359V only | 0.83 | 0.67 | 0.82 | 0.89 | 3.60E-01 | 2.51E-02 | 8.01E-01 | 1.00E+00 |
| 7956639 | NM_005726    | TSFM        | Ts translation elongation factor, mitochondrial                                | L359V only | 0.79 | 0.67 | 0.81 | 0.85 | 1.12E-01 | 8.32E-03 | 5.97E-01 | 8.36E-01 |
| 7922846 | NM_052966    | FAM129A     | family with sequence similarity 129, member A                                  | L359V only | 0.81 | 0.67 | 0.90 | 0.89 | 1.39E-01 | 6.31E-03 | 8.43E-01 | 1.00E+00 |
| 7991485 | NM_001040655 | TTC23       | tetratricopeptide repeat domain 23                                             | L359V only | 0.81 | 0.67 | 0.85 | 0.85 | 2.80E-01 | 2.60E-02 | 8.34E-01 | 9.87E-01 |
| 7973936 | NM_002791    | PSMA6       | proteasome (prosome, macropain) subunit, alpha type, 6                         | L359V only | 0.85 | 0.66 | 0.90 | 0.92 | 4.24E-01 | 2.30E-02 | 8.82E-01 | 1.00E+00 |
| 7965681 | NM_153687    | IKIP        | IKK interacting protein                                                        | L359V only | 0.81 | 0.66 | 0.90 | 0.87 | 5.27E-02 | 1.57E-03 | 8.03E-01 | 6.07E-01 |
| 8085263 | NM_018447    | TMEM111     | transmembrane protein 111                                                      | L359V only | 0.79 | 0.66 | 0.84 | 0.86 | 1.21E-01 | 8.77E-03 | 7.38E-01 | 8.98E-01 |
| 7954196 | NM_145792    | MGST1       | microsomal glutathione S-transferase 1                                         | L359V only | 0.84 | 0.66 | 0.91 | 0.86 | 1.46E-01 | 2.15E-03 | 8.36E-01 | 6.27E-01 |
| 8019243 | NM_001007533 | DYSFIP1     | dysferlin interacting protein 1                                                | L359V only | 0.69 | 0.66 | 1.17 | 0.82 | 5.19E-02 | 2.69E-02 | 8.36E-01 | 8.46E-01 |
| 7909782 | NM_016052    | RRP15       | ribosomal RNA processing 15 homolog (S. cerevisiae)                            | L359V only | 0.84 | 0.66 | 0.87 | 0.88 | 3.06E-01 | 1.27E-02 | 8.36E-01 | 1.00E+00 |
| 7971388 | NM_001010875 | SLC25A30    | solute carrier family 25, member 30                                            | L359V only | 0.80 | 0.66 | 0.89 | 0.90 | 1.45E-01 | 7.74E-03 | 8.36E-01 | 1.00E+00 |
| 7918517 | NM_024102    | WDR77       | WD repeat domain 77                                                            | L359V only | 0.75 | 0.66 | 0.83 | 0.80 | 9.61E-02 | 1.42E-02 | 7.86E-01 | 6.04E-01 |
| 8032682 | NM_139355    | MATK        | megakaryocyte-associated tyrosine kinase                                       | L359V only | 0.77 | 0.66 | 0.94 | 0.89 | 6.59E-02 | 6.35E-03 | 9.15E-01 | 1.00E+00 |
| 8094068 | ---          | ---         | ---                                                                            | L359V only | 0.89 | 0.66 | 0.81 | 0.84 | 5.98E-01 | 1.65E-02 | 7.33E-01 | 8.95E-01 |
| 7902861 | NM_001134476 | LRRC8B      | leucine rich repeat containing 8 family, member B                              | L359V only | 0.77 | 0.66 | 0.89 | 0.84 | 5.27E-02 | 4.26E-03 | 8.30E-01 | 6.27E-01 |
| 8097461 | NM_012118    | CCRN4L      | CCR4 carbon catabolite repression 4-like (S. cerevisiae)                       | L359V only | 0.77 | 0.66 | 0.95 | 0.89 | 8.93E-02 | 9.04E-03 | 9.38E-01 | 1.00E+00 |
| 7927786 | NM_001001330 | REEP3       | receptor accessory protein 3                                                   | L359V only | 0.83 | 0.66 | 0.83 | 0.87 | 1.64E-01 | 3.56E-03 | 6.08E-01 | 7.89E-01 |
| 8109194 | NM_000112    | SLC26A2     | solute carrier family 26 (sulfate transporter), member 2                       | L359V only | 0.94 | 0.66 | 1.01 | 0.91 | 6.64E-01 | 2.16E-03 | 9.94E-01 | 1.00E+00 |
| 7899192 | NM_002953    | RPS6KA1     | ribosomal protein S6 kinase, 90kDa, polypeptide 1                              | L359V only | 0.77 | 0.66 | 0.88 | 0.83 | 6.61E-02 | 6.06E-03 | 8.23E-01 | 6.04E-01 |
| 7932069 | NM_014142    | NUDT5       | nudix (nucleoside diphosphate linked moiety X)-type motif 5                    | L359V only | 0.86 | 0.66 | 0.90 | 0.86 | 2.16E-01 | 2.31E-03 | 8.20E-01 | 6.43E-01 |
| 8159815 | NM_018491    | CBWD1       | COBW domain containing 1                                                       | L359V only | 0.85 | 0.66 | 0.94 | 0.92 | 3.61E-01 | 1.19E-02 | 9.28E-01 | 1.00E+00 |

|         |              |              |                                                                              |            |      |      |      |      |          |          |          |          |
|---------|--------------|--------------|------------------------------------------------------------------------------|------------|------|------|------|------|----------|----------|----------|----------|
| 8041255 | ---          |              |                                                                              | L359V only | 0.93 | 0.66 | 0.81 | 0.84 | 6.75E-01 | 5.46E-03 | 5.21E-01 | 6.45E-01 |
| 8130495 | ---          |              |                                                                              | L359V only | 0.90 | 0.66 | 0.97 | 0.94 | 6.38E-01 | 2.09E-02 | 9.76E-01 | 1.00E+00 |
| 7912224 | NM_003039    | SLC2A5       | solute carrier family 2 (facilitated glucose                                 | L359V only | 0.75 | 0.66 | 0.83 | 0.84 | 5.88E-02 | 7.29E-03 | 7.24E-01 | 7.16E-01 |
| 8044613 | NM_172003    | CBWD2        | COBW domain containing 2                                                     | L359V only | 0.85 | 0.66 | 0.93 | 0.91 | 2.99E-01 | 6.82E-03 | 9.01E-01 | 1.00E+00 |
| 8162260 | ---          |              |                                                                              | L359V only | 0.78 | 0.66 | 0.84 | 0.84 | 2.21E-01 | 2.75E-02 | 8.25E-01 | 9.92E-01 |
| 8096635 | NM_003998    | NFKB1        | nuclear factor of kappa light polypeptide gene enhancer in B-cells 1         | L359V only | 0.95 | 0.66 | 0.92 | 0.92 | 8.11E-01 | 8.65E-03 | 8.85E-01 | 1.00E+00 |
| 8025076 | NM_005428    | VAV1         | vav 1 guanine nucleotide exchange factor                                     | L359V only | 0.79 | 0.65 | 0.82 | 0.85 | 8.20E-02 | 4.12E-03 | 5.47E-01 | 7.02E-01 |
| 8058295 | NM_020919    | ALS2         | amyotrophic lateral sclerosis 2 (juvenile)                                   | L359V only | 1.07 | 0.65 | 1.21 | 0.98 | 7.76E-01 | 1.41E-02 | 7.74E-01 | 1.00E+00 |
| 8038885 | NM_001098612 | SIGLEC14     | sialic acid binding lg-like lectin 14                                        | L359V only | 0.74 | 0.65 | 0.84 | 0.75 | 7.33E-02 | 1.10E-02 | 7.83E-01 | 3.17E-01 |
| 8099807 | AF220235     | GFAF3        | FGF-2 activity-associated protein 3                                          | L359V only | 0.81 | 0.65 | 0.85 | 0.80 | 1.98E-01 | 9.06E-03 | 7.97E-01 | 5.05E-01 |
| 8140814 | NM_018843    | SLC25A40     | solute carrier family 25, member 40                                          | L359V only | 0.85 | 0.65 | 0.83 | 0.87 | 1.29E-01 | 1.11E-03 | 3.97E-01 | 5.89E-01 |
| 7907368 | ---          |              |                                                                              | L359V only | 0.84 | 0.65 | 0.98 | 0.89 | 4.07E-01 | 2.26E-02 | 9.85E-01 | 1.00E+00 |
| 7922414 | NR_003942    | SNORD76      | small nucleolar RNA, C                                                       | L359V only | 0.82 | 0.65 | 0.99 | 0.93 | 2.59E-01 | 1.16E-02 | 9.89E-01 | 1.00E+00 |
| 8096617 | NM_017935    | BANK1        | B-cell scaffold protein with ankyrin repeats 1                               | L359V only | 1.11 | 0.65 | 0.97 | 0.95 | 6.53E-01 | 2.08E-02 | 9.71E-01 | 1.00E+00 |
| 8164907 | NM_020385    | REXO4        | REX4, RNA exonuclease 4 homolog (S. cerevisiae)                              | L359V only | 0.83 | 0.65 | 0.99 | 0.90 | 4.50E-01 | 4.60E-02 | 9.92E-01 | 1.00E+00 |
| 8165156 | NM_001039707 | SDCCAG3      | serologically defined colon cancer antigen 3                                 | L359V only | 0.75 | 0.65 | 0.79 | 0.83 | 8.27E-02 | 9.06E-03 | 5.57E-01 | 7.44E-01 |
| 7918157 | NM_006113    | VAV3         | vav 3 guanine nucleotide exchange factor                                     | L359V only | 1.15 | 0.65 | 1.03 | 0.97 | 2.05E-01 | 1.20E-03 | 9.44E-01 | 1.00E+00 |
| 8161537 | NM_201453    | CBWD3        | COBW domain containing 3                                                     | L359V only | 0.84 | 0.65 | 0.96 | 0.91 | 2.92E-01 | 7.60E-03 | 9.48E-01 | 1.00E+00 |
| 7921667 | NM_001778    | CD48         | CD48 molecule                                                                | L359V only | 0.86 | 0.65 | 0.95 | 0.92 | 4.73E-01 | 1.73E-02 | 9.45E-01 | 1.00E+00 |
| 8157153 | NM_007203    | PALM2-AKAP2  | PALM2-AKAP2 readthrough transcript                                           | L359V only | 1.02 | 0.65 | 0.91 | 0.87 | 9.28E-01 | 1.93E-03 | 8.40E-01 | 7.02E-01 |
| 8161587 | NM_201453    | CBWD3        | COBW domain containing 3                                                     | L359V only | 0.83 | 0.65 | 0.95 | 0.91 | 2.74E-01 | 1.08E-02 | 9.45E-01 | 1.00E+00 |
| 8103005 | NM_014885    | ANAPC10      | anaphase promoting complex subunit 10                                        | L359V only | 0.80 | 0.65 | 0.86 | 0.84 | 2.80E-01 | 2.34E-02 | 8.41E-01 | 9.88E-01 |
| 7921076 | NM_182679    | GPATCH4      | G patch domain containing 4                                                  | L359V only | 0.76 | 0.65 | 0.86 | 0.85 | 9.13E-02 | 8.88E-03 | 8.20E-01 | 8.73E-01 |
| 7982350 | NR_024074    | GOLGA9P      | golgi autoantigen, golgin subfamily a, 9 pseudogene                          | L359V only | 0.78 | 0.65 | 0.79 | 0.84 | 6.04E-02 | 3.26E-03 | 3.90E-01 | 6.07E-01 |
| 7987139 | NR_024074    | GOLGA9P      | golgi autoantigen, golgin subfamily a, 9 pseudogene                          | L359V only | 0.78 | 0.65 | 0.79 | 0.84 | 6.04E-02 | 3.26E-03 | 3.90E-01 | 6.07E-01 |
| 8039692 | AK022663     | LOC730051    | similar to hCG2044798                                                        | L359V only | 1.10 | 0.65 | 0.97 | 1.01 | 7.69E-01 | 4.59E-02 | 9.77E-01 | 1.00E+00 |
| 8064003 | XR_039224    | LOC100132911 | similar to DPH3 homolog B (CSL-type zinc finger-containing protein 1)        | L359V only | 0.84 | 0.65 | 0.84 | 0.86 | 3.25E-01 | 9.36E-03 | 7.98E-01 | 9.41E-01 |
| 7968126 | NM_002339    | LSP1         | lymphocyte-specific protein 1                                                | L359V only | 0.73 | 0.65 | 0.82 | 0.79 | 9.50E-02 | 1.85E-02 | 7.85E-01 | 6.64E-01 |
| 8128322 | NM_014165    | C6orf66      | chromosome 6 open reading frame 66                                           | L359V only | 0.75 | 0.65 | 0.88 | 0.84 | 1.47E-01 | 2.19E-02 | 8.66E-01 | 9.81E-01 |
| 8155636 | NM_201453    | CBWD3        | COBW domain containing 3                                                     | L359V only | 0.83 | 0.64 | 0.95 | 0.91 | 2.71E-01 | 7.86E-03 | 9.36E-01 | 1.00E+00 |
| 7915640 | NM_020365    | EIF2B3       | eukaryotic translation initiation factor 2B, subunit 3 gamma, 58kDa          | L359V only | 0.82 | 0.64 | 0.88 | 0.87 | 1.93E-01 | 6.69E-03 | 8.35E-01 | 9.32E-01 |
| 7951325 | NM_032299    | DCUN1D5      | DCN1, defective in cullin neddylation 1, domain containing 5 (S. cerevisiae) | L359V only | 0.76 | 0.64 | 0.87 | 0.91 | 2.37E-01 | 4.33E-02 | 8.80E-01 | 1.00E+00 |
| 7922400 | ---          |              |                                                                              | L359V only | 0.79 | 0.64 | 1.11 | 0.92 | 2.65E-01 | 2.32E-02 | 8.93E-01 | 1.00E+00 |
| 8132503 | NM_004760    | STK17A       | serine                                                                       | L359V only | 0.85 | 0.64 | 0.71 | 0.82 | 3.47E-01 | 7.08E-03 | 1.72E-01 | 6.26E-01 |
| 7938687 | NM_005013    | NUCB2        | nucleobindin 2                                                               | L359V only | 0.83 | 0.64 | 0.97 | 0.91 | 3.51E-01 | 1.46E-02 | 9.71E-01 | 1.00E+00 |
| 8164596 | NM_016520    | C9orf78      | chromosome 9 open reading frame 78                                           | L359V only | 0.74 | 0.64 | 0.89 | 0.85 | 5.50E-02 | 6.37E-03 | 8.52E-01 | 8.14E-01 |
| 7927799 | BC018658     | REEP3        | receptor accessory protein 3                                                 | L359V only | 0.88 | 0.64 | 0.83 | 0.85 | 5.52E-01 | 1.39E-02 | 7.90E-01 | 9.88E-01 |
| 7954382 | NM_024854    | PYROXD1      | pyridine nucleotide-disulphide oxidoreductase domain 1                       | L359V only | 0.99 | 0.64 | 1.00 | 1.01 | 9.78E-01 | 2.13E-02 | 9.99E-01 | 1.00E+00 |
| 8089568 | NM_138806    | CD200R1      | CD200 receptor 1                                                             | L359V only | 1.25 | 0.64 | 0.71 | 0.84 | 1.81E-01 | 8.39E-03 | 2.03E-01 | 8.36E-01 |
| 8166730 | NM_000397    | CYBB         | cytochrome b-245, beta polypeptide                                           | L359V only | 0.81 | 0.64 | 0.88 | 0.87 | 5.27E-02 | 1.03E-03 | 7.28E-01 | 5.91E-01 |
| 8063345 | NR_002433    | SNORD12C     | small nucleolar RNA, C                                                       | L359V only | 0.80 | 0.64 | 0.91 | 0.86 | 1.65E-01 | 6.85E-03 | 8.82E-01 | 8.88E-01 |
| 7970864 | NM_006644    | HSPH1        | heat shock 105kDa                                                            | L359V only | 0.76 | 0.64 | 0.83 | 0.79 | 6.07E-02 | 4.04E-03 | 6.64E-01 | 3.35E-01 |
| 7925257 | NM_000081    | LYST         | lysosomal trafficking regulator                                              | L359V only | 0.83 | 0.64 | 0.76 | 0.85 | 1.70E-01 | 3.16E-03 | 2.51E-01 | 7.02E-01 |
| 8038877 | NM_003830    | SIGLEC5      | sialic acid binding lg-like lectin 5                                         | L359V only | 1.01 | 0.64 | 1.07 | 0.85 | 9.76E-01 | 1.30E-02 | 9.31E-01 | 9.51E-01 |
| 8097903 | NM_003264    | TLR2         | toll-like receptor 2                                                         | L359V only | 0.85 | 0.63 | 1.06 | 0.94 | 4.56E-01 | 2.09E-02 | 9.44E-01 | 1.00E+00 |
| 8016870 | NM_016070    | MRPS23       | mitochondrial ribosomal protein S23                                          | L359V only | 0.77 | 0.63 | 0.94 | 0.87 | 9.06E-02 | 5.35E-03 | 9.17E-01 | 9.45E-01 |
| 7983734 | NM_014548    | TMOD2        | tropomodulin 2 (neuronal)                                                    | L359V only | 0.78 | 0.63 | 0.78 | 0.85 | 1.82E-01 | 1.39E-02 | 6.39E-01 | 9.79E-01 |
| 7982256 | NR_024074    | GOLGA9P      | golgi autoantigen, golgin subfamily a, 9 pseudogene                          | L359V only | 0.78 | 0.63 | 0.81 | 0.85 | 1.01E-01 | 3.98E-03 | 5.76E-01 | 7.88E-01 |
| 8051396 | NM_021209    | NLR4         | NLR family, CARD domain containing 4                                         | L359V only | 0.75 | 0.63 | 0.93 | 0.83 | 1.48E-01 | 1.70E-02 | 9.30E-01 | 8.92E-01 |
| 8084955 | NM_017861    | PIGX         | phosphatidylinositol glycan anchor biosynthesis, class X                     | L359V only | 0.82 | 0.63 | 0.84 | 0.86 | 1.59E-01 | 2.96E-03 | 6.97E-01 | 8.35E-01 |
| 8155422 | BC043420     | CBWD5        | COBW domain containing 5                                                     | L359V only | 0.81 | 0.63 | 0.95 | 0.90 | 2.92E-01 | 1.45E-02 | 9.54E-01 | 1.00E+00 |
| 8116848 | NM_017906    | PAK1IP1      | PAK1 interacting protein 1                                                   | L359V only | 0.87 | 0.63 | 1.01 | 0.88 | 3.57E-01 | 3.58E-03 | 9.85E-01 | 1.00E+00 |
| 7942832 | NM_145018    | C11orf82     | chromosome 11 open reading frame 82                                          | L359V only | 0.76 | 0.63 | 0.86 | 0.84 | 5.75E-02 | 2.96E-03 | 7.73E-01 | 6.45E-01 |
| 8051413 | NM_015475    | FAM98A       | family with sequence similarity 98, member A                                 | L359V only | 0.78 | 0.63 | 0.90 | 0.83 | 1.51E-01 | 8.19E-03 | 8.73E-01 | 7.48E-01 |
| 7954729 | NM_139241    | FGD4         | FYVE, RhoGEF and PH domain containing 4                                      | L359V only | 0.86 | 0.63 | 0.84 | 0.84 | 5.72E-01 | 2.67E-02 | 8.38E-01 | 1.00E+00 |
| 7951654 | NM_138378    | FDXACB1      | ferredoxin-fold anticodon binding domain containing 1                        | L359V only | 0.73 | 0.63 | 0.97 | 0.85 | 1.32E-01 | 2.16E-02 | 9.81E-01 | 1.00E+00 |
| 8097335 | NM_014278    | HSPA4L       | heat shock 70kDa protein 4-like                                              | L359V only | 0.76 | 0.63 | 0.91 | 0.86 | 9.34E-02 | 6.70E-03 | 8.77E-01 | 9.35E-01 |
| 8115164 | ---          |              |                                                                              | L359V only | 0.78 | 0.63 | 0.88 | 0.84 | 1.92E-01 | 1.10E-02 | 8.64E-01 | 9.20E-01 |
| 8150877 | NR_002437    | SNORD54      | small nucleolar RNA, C                                                       | L359V only | 1.06 | 0.62 | 1.01 | 1.01 | 8.10E-01 | 9.66E-03 | 9.93E-01 | 1.00E+00 |
| 8106280 | NM_000859    | HMGCR        | 3-hydroxy-3-methylglutaryl-Coenzyme A reductase                              | L359V only | 0.81 | 0.62 | 0.95 | 0.87 | 2.55E-01 | 1.04E-02 | 9.44E-01 | 1.00E+00 |
| 8070961 | NM_002340    | LSS          | lanosterol synthase (2,3-oxidosqualene-lanosterol cyclase)                   | L359V only | 0.79 | 0.62 | 0.95 | 0.83 | 1.92E-01 | 8.55E-03 | 9.43E-01 | 7.97E-01 |
| 8123137 | NM_005891    | ACAT2        | acetyl-Coenzyme A acetyltransferase 2                                        | L359V only | 0.75 | 0.62 | 0.92 | 0.81 | 1.08E-01 | 9.58E-03 | 9.02E-01 | 7.09E-01 |
| 8153002 | NM_001135242 | NDRG1        | N-myc downstream regulated 1                                                 | L359V only | 1.14 | 0.62 | 1.25 | 0.93 | 3.11E-01 | 1.55E-03 | 3.74E-01 | 1.00E+00 |
| 8147262 | NM_016023    | OTUD6B       | OTU domain containing 6B                                                     | L359V only | 0.78 | 0.62 | 0.81 | 0.84 | 1.20E-01 | 5.23E-03 | 6.66E-01 | 7.88E-01 |
| 7948906 | NR_002563    | SNORD27      | small nucleolar RNA, C                                                       | L359V only | 1.00 | 0.62 | 0.87 | 0.96 | 9.91E-01 | 3.32E-02 | 8.81E-01 | 1.00E+00 |

|         |                 |              |                                                                                     |            |      |      |      |      |          |          |          |          |
|---------|-----------------|--------------|-------------------------------------------------------------------------------------|------------|------|------|------|------|----------|----------|----------|----------|
| 8111153 | NM_012334       | MYO10        | myosin X                                                                            | L359V only | 0.93 | 0.62 | 0.94 | 0.90 | 6.85E-01 | 2.83E-03 | 9.08E-01 | 1.00E+00 |
| 8062211 | ENST00000368864 | BXDC1        | brix domain containing 1                                                            | L359V only | 0.77 | 0.62 | 0.88 | 0.87 | 7.37E-02 | 3.37E-03 | 8.25E-01 | 8.99E-01 |
| 7913705 | NM_001841       | CNR2         | cannabinoid receptor 2 (macrophage)                                                 | L359V only | 0.85 | 0.62 | 0.92 | 0.80 | 2.96E-01 | 3.67E-03 | 8.85E-01 | 4.78E-01 |
| 8161575 | BC043420        | CBWD5        | COBW domain containing 5                                                            | L359V only | 0.79 | 0.62 | 0.95 | 0.87 | 3.81E-01 | 4.65E-02 | 9.70E-01 | 1.00E+00 |
| 8002760 | ENST00000406997 | LOC100132346 | similar to chaperonin 10                                                            | L359V only | 0.85 | 0.62 | 0.87 | 0.84 | 5.11E-01 | 2.08E-02 | 8.74E-01 | 1.00E+00 |
| 8122440 | NM_032860       | LTV1         | LTV1 homolog (S. cerevisiae)                                                        | L359V only | 0.79 | 0.62 | 0.86 | 0.83 | 1.92E-01 | 9.44E-03 | 8.34E-01 | 8.72E-01 |
| 7973110 | NM_002934       | RNASE2       | ribonuclease, RNase A family, 2 (liver, eosinophil-derived neurotoxin)              | L359V only | 0.76 | 0.62 | 1.15 | 0.88 | 2.51E-01 | 3.21E-02 | 8.80E-01 | 1.00E+00 |
| 7990657 | NM_144572       | TBC1D2B      | TBC1 domain family, member 2B                                                       | L359V only | 0.79 | 0.62 | 0.90 | 0.87 | 1.30E-01 | 3.91E-03 | 8.66E-01 | 9.62E-01 |
| 8082673 | NM_001099       | ACPP         | acid phosphatase, prostate                                                          | L359V only | 0.77 | 0.62 | 1.06 | 0.88 | 6.42E-02 | 2.42E-03 | 9.15E-01 | 9.41E-01 |
| 7950990 | NM_152313       | SLC36A4      | solute carrier family 36 (proton                                                    | L359V only | 0.86 | 0.62 | 0.94 | 0.87 | 4.03E-01 | 6.17E-03 | 9.27E-01 | 1.00E+00 |
| 7979085 | NM_002863       | PYGL         | phosphorylase, glycogen, liver                                                      | L359V only | 0.92 | 0.61 | 1.03 | 0.91 | 5.48E-01 | 1.03E-03 | 9.59E-01 | 1.00E+00 |
| 8166455 | NM_006406       | PRDX4        | peroxiredoxin 4                                                                     | L359V only | 0.79 | 0.61 | 0.96 | 0.86 | 1.06E-01 | 2.61E-03 | 9.54E-01 | 8.61E-01 |
| 8048864 | NM_004591       | CCL20        | chemokine (C-C motif) ligand 20                                                     | L359V only | 0.86 | 0.61 | 0.90 | 0.81 | 3.86E-01 | 5.10E-03 | 8.65E-01 | 6.26E-01 |
| 8123985 | ---             | ---          | ---                                                                                 | L359V only | 0.78 | 0.61 | 0.73 | 0.85 | 2.87E-01 | 2.52E-02 | 6.30E-01 | 1.00E+00 |
| 8055465 | NM_001008540    | CXCR4        | chemokine (C-X-C motif) receptor 4                                                  | L359V only | 1.30 | 0.61 | 1.08 | 1.02 | 2.61E-01 | 2.32E-02 | 9.38E-01 | 1.00E+00 |
| 8114733 | NM_022481       | ARAP3        | ArfGAP with RhoGAP domain, ankyrin repeat and PH domain 3                           | L359V only | 0.83 | 0.61 | 0.87 | 0.80 | 1.57E-01 | 1.62E-03 | 8.01E-01 | 3.35E-01 |
| 8152606 | NM_021021       | SNTB1        | syntrophin, beta 1 (dystrophin-associated protein A1, 59kDa, basic component 1)     | L359V only | 0.92 | 0.61 | 0.92 | 0.90 | 5.36E-01 | 7.94E-04 | 8.64E-01 | 9.35E-01 |
| 8046408 | NM_002610       | PDK1         | pyruvate dehydrogenase kinase, isozyme 1                                            | L359V only | 0.81 | 0.61 | 0.99 | 0.90 | 1.66E-01 | 3.02E-03 | 9.94E-01 | 1.00E+00 |
| 7943605 | NM_000019       | ACAT1        | acetyl-Coenzyme A acetyltransferase 1                                               | L359V only | 0.72 | 0.61 | 0.84 | 0.89 | 1.26E-01 | 1.76E-02 | 8.36E-01 | 1.00E+00 |
| 7901052 | NR_001457       | SNORD38B     | small nucleolar RNA, C                                                              | L359V only | 0.86 | 0.60 | 0.89 | 0.85 | 5.10E-01 | 1.39E-02 | 8.85E-01 | 1.00E+00 |
| 8113214 | NM_002064       | GLRX         | glutaredoxin (thioltransferase)                                                     | L359V only | 0.75 | 0.60 | 0.78 | 0.77 | 5.05E-02 | 2.45E-03 | 4.33E-01 | 2.81E-01 |
| 7909801 | NM_138794       | LYPLAL1      | lysophospholipase-like 1                                                            | L359V only | 0.93 | 0.60 | 0.90 | 0.89 | 8.04E-01 | 1.49E-02 | 8.90E-01 | 1.00E+00 |
| 8057561 | ---             | ---          | ---                                                                                 | L359V only | 0.77 | 0.60 | 0.77 | 0.85 | 1.72E-01 | 7.53E-03 | 6.11E-01 | 9.93E-01 |
| 8156043 | NM_058179       | PSAT1        | phosphoserine aminotransferase 1                                                    | L359V only | 0.81 | 0.60 | 1.22 | 1.04 | 4.03E-01 | 2.52E-02 | 8.33E-01 | 1.00E+00 |
| 7923582 | XM_001719378    | LOC100132728 | similar to cpn10 protein                                                            | L359V only | 0.87 | 0.59 | 0.91 | 0.86 | 6.45E-01 | 2.34E-02 | 9.26E-01 | 1.00E+00 |
| 8150253 | NM_000349       | STAR         | steroidogenic acute regulatory protein                                              | L359V only | 0.95 | 0.59 | 1.13 | 1.00 | 8.36E-01 | 3.25E-03 | 8.41E-01 | 1.00E+00 |
| 7945110 | NM_006278       | ST3GAL4      | ST3 beta-galactoside alpha-2,3-sialyltransferase 4                                  | L359V only | 0.81 | 0.59 | 0.95 | 0.86 | 1.73E-01 | 2.44E-03 | 9.36E-01 | 9.20E-01 |
| 8042381 | NM_020143       | PNO1         | partner of NOB1 homolog (S. cerevisiae)                                             | L359V only | 0.77 | 0.59 | 0.80 | 0.83 | 1.87E-01 | 7.75E-03 | 7.52E-01 | 9.19E-01 |
| 8003861 | NM_182538       | SPNS3        | spinster homolog 3 (Drosophila)                                                     | L359V only | 0.68 | 0.59 | 0.95 | 0.81 | 5.58E-02 | 8.41E-03 | 9.47E-01 | 8.36E-01 |
| 8064451 | NM_001122962    | SIRPB2       | signal-regulatory protein beta 2                                                    | L359V only | 0.76 | 0.59 | 1.00 | 0.82 | 2.08E-01 | 1.39E-02 | 9.99E-01 | 9.32E-01 |
| 8119096 | AK125083        | FLJ43093     | FLJ43093 protein                                                                    | L359V only | 1.04 | 0.58 | 1.10 | 0.89 | 8.31E-01 | 8.75E-04 | 8.41E-01 | 9.89E-01 |
| 7904414 | M27137          | HSD3B1       | hydroxy-delta-5-steroid dehydrogenase, 3 beta- and steroid delta-isomerase 1        | L359V only | 0.87 | 0.58 | 1.10 | 0.90 | 6.26E-01 | 1.73E-02 | 9.21E-01 | 1.00E+00 |
| 8168470 | NM_001866       | COX7B        | cytochrome c oxidase subunit VIIb                                                   | L359V only | 0.84 | 0.58 | 0.77 | 0.84 | 3.61E-01 | 3.89E-03 | 5.43E-01 | 8.90E-01 |
| 8083850 | ---             | ---          | ---                                                                                 | L359V only | 0.85 | 0.58 | 0.86 | 0.87 | 5.04E-01 | 1.24E-02 | 8.59E-01 | 1.00E+00 |
| 8020110 | NM_006868       | RAB31        | RAB31, member RAS oncogene family                                                   | L359V only | 0.91 | 0.58 | 0.77 | 0.81 | 7.59E-01 | 1.25E-02 | 7.28E-01 | 8.88E-01 |
| 7985224 | BC141940        | LOC646938    | similar to TBC1 domain family, member 2B                                            | L359V only | 0.76 | 0.57 | 0.86 | 0.81 | 1.12E-01 | 3.19E-03 | 8.19E-01 | 6.23E-01 |
| 8056102 | NM_014880       | CD302        | CD302 molecule                                                                      | L359V only | 1.02 | 0.57 | 1.00 | 0.92 | 9.46E-01 | 1.27E-03 | 9.99E-01 | 1.00E+00 |
| 8127989 | NR_003044       | SNORD50B     | small nucleolar RNA                                                                 | L359V only | 0.89 | 0.57 | 0.86 | 0.86 | 7.17E-01 | 2.19E-02 | 8.77E-01 | 1.00E+00 |
| 8024062 | NM_001928       | CFD          | complement factor D (adipsin)                                                       | L359V only | 0.69 | 0.57 | 0.78 | 0.78 | 5.58E-02 | 6.17E-03 | 6.73E-01 | 6.01E-01 |
| 8152092 | ---             | ---          | ---                                                                                 | L359V only | 0.95 | 0.57 | 0.63 | 0.76 | 8.78E-01 | 6.49E-03 | 1.44E-01 | 5.55E-01 |
| 8122554 | NM_006834       | RAB32        | RAB32, member RAS oncogene family                                                   | L359V only | 0.95 | 0.57 | 0.88 | 0.84 | 8.06E-01 | 1.49E-03 | 8.36E-01 | 7.47E-01 |
| 8174076 | NM_000169       | GLA          | galactosidase, alpha                                                                | L359V only | 0.85 | 0.56 | 0.89 | 0.87 | 2.70E-01 | 9.17E-04 | 8.33E-01 | 8.42E-01 |
| 8096459 | ---             | ---          | ---                                                                                 | L359V only | 0.75 | 0.56 | 0.81 | 0.75 | 1.79E-01 | 8.06E-03 | 8.09E-01 | 5.70E-01 |
| 8095744 | NM_001657       | AREG         | amphiregulin                                                                        | L359V only | 0.73 | 0.56 | 0.72 | 0.82 | 3.45E-01 | 4.98E-02 | 7.98E-01 | 1.00E+00 |
| 8114787 | NM_005471       | GNPDA1       | glucosamine-6-phosphate deaminase 1                                                 | L359V only | 0.69 | 0.56 | 0.80 | 0.81 | 2.07E-01 | 3.53E-02 | 8.41E-01 | 1.00E+00 |
| 8139456 | NR_002952       | SNORA9       | small nucleolar RNA, H                                                              | L359V only | 0.66 | 0.56 | 0.79 | 0.85 | 1.34E-01 | 2.83E-02 | 8.25E-01 | 1.00E+00 |
| 8119102 | ENST00000229824 | RAB44        | RAB44, member RAS oncogene family                                                   | L359V only | 0.90 | 0.55 | 1.04 | 0.83 | 5.17E-01 | 7.04E-04 | 9.40E-01 | 5.31E-01 |
| 8023259 | NR_002571       | SNORD58A     | small nucleolar RNA, C                                                              | L359V only | 0.80 | 0.55 | 1.15 | 0.95 | 1.29E-01 | 8.70E-04 | 8.09E-01 | 1.00E+00 |
| 8122265 | NM_006290       | TNFAIP3      | tumor necrosis factor, alpha-induced protein 3                                      | L359V only | 1.24 | 0.55 | 1.03 | 0.93 | 4.25E-01 | 1.32E-02 | 9.82E-01 | 1.00E+00 |
| 8107326 | NR_002922       | SNORA13      | small nucleolar RNA, H                                                              | L359V only | 0.69 | 0.55 | 0.89 | 0.79 | 7.12E-02 | 4.84E-03 | 8.81E-01 | 7.02E-01 |
| 7942400 | NM_176072       | P2RY2        | purinergic receptor P2Y, G-protein coupled, 2                                       | L359V only | 0.92 | 0.54 | 1.22 | 0.89 | 7.63E-01 | 3.96E-03 | 8.01E-01 | 1.00E+00 |
| 7917779 | NM_002061       | GCLM         | glutamate-cysteine ligase, modifier subunit                                         | L359V only | 0.64 | 0.54 | 0.84 | 0.77 | 5.58E-02 | 8.99E-03 | 8.38E-01 | 7.44E-01 |
| 7953901 | NM_138337       | CLEC12A      | C-type lectin domain family 12, member A                                            | L359V only | 1.43 | 0.54 | 1.26 | 1.04 | 1.05E-01 | 7.26E-03 | 7.98E-01 | 1.00E+00 |
| 7951077 | NM_144665       | SESN3        | sestrin 3                                                                           | L359V only | 0.92 | 0.54 | 0.79 | 0.78 | 6.71E-01 | 1.03E-03 | 5.38E-01 | 3.88E-01 |
| 8103951 | NM_001995       | ACSL1        | acyl-CoA synthetase long-chain family member 1                                      | L359V only | 0.81 | 0.54 | 1.03 | 0.87 | 6.96E-02 | 2.24E-04 | 9.48E-01 | 6.93E-01 |
| 7943240 | NM_152431       | PIWIL4       | piwi-like 4 (Drosophila)                                                            | L359V only | 0.79 | 0.54 | 0.86 | 0.80 | 1.06E-01 | 7.97E-04 | 8.01E-01 | 4.56E-01 |
| 8041642 | ---             | ---          | ---                                                                                 | L359V only | 0.71 | 0.53 | 0.78 | 0.75 | 3.10E-01 | 3.75E-02 | 8.38E-01 | 9.56E-01 |
| 7922416 | NR_003941       | SNORD75      | small nucleolar RNA, C                                                              | L359V only | 0.79 | 0.53 | 0.89 | 0.84 | 1.33E-01 | 1.09E-03 | 8.58E-01 | 7.47E-01 |
| 8023646 | NM_000633       | BCL2         | B-cell CLL                                                                          | L359V only | 0.82 | 0.53 | 1.03 | 0.86 | 2.54E-01 | 1.20E-03 | 9.66E-01 | 9.41E-01 |
| 8121510 | NM_032194       | BXDC1        | brix domain containing 1                                                            | L359V only | 0.82 | 0.52 | 0.92 | 0.89 | 1.70E-01 | 5.62E-04 | 8.80E-01 | 1.00E+00 |
| 8056766 | NM_003705       | SLC25A12     | solute carrier family 25 (mitochondrial carrier, Aralar), member 12                 | L359V only | 0.79 | 0.52 | 0.98 | 0.86 | 5.72E-02 | 2.70E-04 | 9.80E-01 | 6.58E-01 |
| 8086344 | NM_001337       | CX3CR1       | chemokine (C-X3-C motif) receptor 1                                                 | L359V only | 1.11 | 0.52 | 0.86 | 0.81 | 7.35E-01 | 6.67E-03 | 8.64E-01 | 9.62E-01 |
| 8029098 | NM_002483       | CEACAM6      | carcinoembryonic antigen-related cell adhesion molecule 6 (non-specific cross react | L359V only | 0.59 | 0.52 | 0.65 | 0.66 | 5.36E-02 | 1.57E-02 | 4.96E-01 | 4.46E-01 |
| 7957023 | NM_000239       | LYZ          | lysozyme (renal amyloidosis)                                                        | L359V only | 0.72 | 0.52 | 0.77 | 0.77 | 1.30E-01 | 4.06E-03 | 7.29E-01 | 6.55E-01 |
| 8147049 | NM_001444       | FABP5        | fatty acid binding protein 5 (psoriasis-associated)                                 | L359V only | 0.72 | 0.52 | 0.94 | 0.81 | 7.55E-02 | 1.97E-03 | 9.30E-01 | 7.47E-01 |

|         |              |               |                                                                                     |                 |      |      |      |      |          |          |          |          |
|---------|--------------|---------------|-------------------------------------------------------------------------------------|-----------------|------|------|------|------|----------|----------|----------|----------|
| 8014316 | NM_002985    | CCL5          | chemokine (C-C motif) ligand 5                                                      | L359V only      | 0.78 | 0.52 | 1.22 | 0.85 | 1.18E-01 | 7.97E-04 | 6.83E-01 | 8.17E-01 |
| 7948420 | NM_001444    | FABP5         | fatty acid binding protein 5 (psoriasis-associated)                                 | L359V only      | 0.72 | 0.51 | 0.93 | 0.81 | 6.62E-02 | 1.68E-03 | 9.27E-01 | 7.13E-01 |
| 7906377 | NM_002432    | MNDA          | myeloid cell nuclear differentiation antigen                                        | L359V only      | 0.70 | 0.51 | 0.87 | 0.76 | 9.84E-02 | 4.04E-03 | 8.66E-01 | 6.27E-01 |
| 7992861 | ---          | ---           | ---                                                                                 | L359V only      | 0.60 | 0.51 | 0.97 | 0.69 | 9.11E-02 | 2.29E-02 | 9.82E-01 | 6.77E-01 |
| 8123407 | NM_001040001 | MLLT4         | myeloid lymphoid or mixed-lineage leukemia (trithorax homolog, Drosophila); translo | L359V only      | 0.96 | 0.49 | 1.02 | 0.86 | 7.71E-01 | 8.05E-05 | 9.62E-01 | 5.95E-01 |
| 7914950 | NM_156039    | CSF3R         | colony stimulating factor 3 receptor (granulocyte)                                  | L359V only      | 1.31 | 0.49 | 1.14 | 0.89 | 1.15E-01 | 8.25E-04 | 8.43E-01 | 1.00E+00 |
| 8170364 | NM_002025    | AFF2          | AF4                                                                                 | L359V only      | 0.95 | 0.46 | 1.02 | 0.82 | 7.56E-01 | 1.28E-04 | 9.81E-01 | 4.61E-01 |
| 8010915 | NM_182705    | FAM101B       | family with sequence similarity 101, member B                                       | L359V only      | 1.12 | 0.46 | 1.24 | 0.88 | 4.97E-01 | 2.72E-04 | 5.83E-01 | 1.00E+00 |
| 7953749 | NM_080387    | CLEC4D        | C-type lectin domain family 4, member D                                             | L359V only      | 0.64 | 0.46 | 0.77 | 0.70 | 7.63E-02 | 3.97E-03 | 8.01E-01 | 5.23E-01 |
| 8045499 | NM_006895    | HNMT          | histamine N-methyltransferase                                                       | L359V only      | 0.65 | 0.45 | 0.76 | 0.76 | 8.93E-02 | 3.35E-03 | 7.85E-01 | 7.47E-01 |
| 8127778 | NM_017633    | FAM46A        | family with sequence similarity 46, member A                                        | L359V only      | 0.87 | 0.44 | 1.05 | 0.86 | 4.26E-01 | 2.73E-04 | 9.36E-01 | 9.13E-01 |
| 8021645 | NM_005024    | SERPINB10     | serpin peptidase inhibitor, clade B (ovalbumin), member 10                          | L359V only      | 0.69 | 0.44 | 1.37 | 0.85 | 3.80E-01 | 2.69E-02 | 8.36E-01 | 1.00E+00 |
| 7908376 | NM_130782    | RGS18         | regulator of G-protein signaling 18                                                 | L359V only      | 0.86 | 0.43 | 0.82 | 0.75 | 4.00E-01 | 2.61E-04 | 7.35E-01 | 3.05E-01 |
| 8102800 | NM_014331    | SLC7A11       | solute carrier family 7, (cationic amino acid transporter, y+ system) member 11     | L359V only      | 1.24 | 0.43 | 1.50 | 1.12 | 4.92E-01 | 3.98E-03 | 5.43E-01 | 1.00E+00 |
| 8158684 | ---          | ---           | ---                                                                                 | L359V only      | 0.46 | 0.42 | 1.04 | 0.87 | 6.84E-02 | 3.15E-02 | 9.85E-01 | 1.00E+00 |
| 8139100 | M30894       | TARP          | TCR gamma alternate reading frame protein                                           | L359V only      | 0.89 | 0.42 | 1.00 | 0.83 | 4.87E-01 | 1.53E-04 | 9.99E-01 | 6.57E-01 |
| 8101788 | NM_003728    | UNC5C         | unc-5 homolog C (C. elegans)                                                        | L359V only      | 1.03 | 0.41 | 0.95 | 0.84 | 9.32E-01 | 5.10E-04 | 9.54E-01 | 9.88E-01 |
| 7905060 | NM_000566    | FCGR1A        | Fc fragment of IgG, high affinity Ia, receptor (CD64)                               | L359V only      | 0.82 | 0.41 | 1.46 | 0.93 | 3.52E-01 | 6.09E-04 | 3.25E-01 | 1.00E+00 |
| 7919133 | NM_000566    | FCGR1A        | Fc fragment of IgG, high affinity Ia, receptor (CD64)                               | L359V only      | 0.82 | 0.40 | 1.46 | 0.93 | 3.23E-01 | 4.51E-04 | 2.75E-01 | 1.00E+00 |
| 7905047 | NM_000566    | FCGR1A        | Fc fragment of IgG, high affinity Ia, receptor (CD64)                               | L359V only      | 0.81 | 0.38 | 1.45 | 0.92 | 4.06E-01 | 8.40E-04 | 4.52E-01 | 1.00E+00 |
| 7997188 | NM_005143    | HP            | haptoglobin                                                                         | L359V only      | 0.64 | 0.36 | 0.52 | 0.56 | 2.43E-01 | 7.63E-03 | 3.74E-01 | 3.86E-01 |
| 8131479 | NM_019005    | FLJ20323      | hypothetical protein FLJ20323                                                       | T354M and L359V | 0.94 | 0.65 | 0.65 | 0.86 | 7.16E-01 | 3.77E-03 | 3.18E-02 | 8.21E-01 |
| 7950578 | NM_001128620 | PAK1          | p21 protein (Cdc42)                                                                 | T354M only      | 0.86 | 1.07 | 0.66 | 0.88 | 2.40E-01 | 6.19E-01 | 2.62E-02 | 8.38E-01 |
| 8012841 | ---          | PIRT prom/enh | promoter-enhancer region                                                            | T354M only      | 0.72 | 0.59 | 0.36 | 0.60 | 3.72E-01 | 9.42E-02 | 4.10E-02 | 4.46E-01 |
| 8117034 | NM_006877    | GMPR          | guanosine monophosphate reductase                                                   | WT and L359V    | 2.36 | 8.70 | 1.50 | 1.90 | 1.30E-02 | 5.75E-05 | 7.04E-01 | 1.98E-01 |
| 8171105 | NM_022148    | CRLF2         | cytokine receptor-like factor 2                                                     | WT and L359V    | 2.38 | 5.47 | 1.63 | 1.98 | 5.31E-03 | 8.17E-05 | 3.65E-01 | 8.32E-02 |
| 8103769 | NM_000860    | HPGD          | hydroxyprostaglandin dehydrogenase 15-(NAD)                                         | WT and L359V    | 6.04 | 5.14 | 1.93 | 2.26 | 3.14E-04 | 3.91E-04 | 2.90E-01 | 1.05E-01 |
| 8006531 | NM_144975    | SLFN5         | schlafen family member 5                                                            | WT and L359V    | 5.52 | 5.13 | 1.71 | 2.26 | 3.09E-04 | 2.78E-04 | 4.36E-01 | 7.78E-02 |
| 8044021 | NM_016232    | IL1RL1        | interleukin 1 receptor-like 1                                                       | WT and L359V    | 3.92 | 4.73 | 2.24 | 2.03 | 1.08E-03 | 3.55E-04 | 9.60E-02 | 1.36E-01 |
| 7911199 | AK124520     | C1orf150      | chromosome 1 open reading frame 150                                                 | WT and L359V    | 2.71 | 4.18 | 2.28 | 1.81 | 1.38E-02 | 1.42E-03 | 1.86E-01 | 3.99E-01 |
| 7906777 | NM_004001    | FCGR2B        | Fc fragment of IgG, low affinity IIb, receptor (CD32)                               | WT and L359V    | 2.89 | 3.53 | 1.47 | 1.72 | 9.43E-03 | 2.63E-03 | 7.98E-01 | 4.76E-01 |
| 7906443 | NM_002001    | FCER1A        | Fc fragment of IgE, high affinity I, receptor for; alpha polypeptide                | WT and L359V    | 3.74 | 3.19 | 1.90 | 1.86 | 1.69E-03 | 2.33E-03 | 2.90E-01 | 2.63E-01 |
| 7926368 | NM_003380    | VIM           | vimentin                                                                            | WT and L359V    | 2.03 | 2.83 | 1.48 | 1.61 | 2.17E-03 | 1.85E-04 | 2.13E-01 | 7.78E-02 |
| 7961365 | NM_018050    | MANSC1        | MANSC domain containing 1                                                           | WT and L359V    | 2.57 | 2.80 | 1.18 | 1.57 | 5.80E-04 | 2.73E-04 | 8.36E-01 | 1.32E-01 |
| 8034851 | NM_032571    | EMR3          | egf-like module containing, mucin-like, hormone receptor-like 3                     | WT and L359V    | 2.57 | 2.77 | 1.17 | 1.52 | 1.87E-03 | 8.40E-04 | 8.75E-01 | 3.09E-01 |
| 8023043 | NM_024430    | PSTPIP2       | proline-serine-threonine phosphatase interacting protein 2                          | WT and L359V    | 2.74 | 2.73 | 1.88 | 1.70 | 1.69E-03 | 1.11E-03 | 1.07E-01 | 1.74E-01 |
| 8047926 | NM_002374    | MAP2          | microtubule-associated protein 2                                                    | WT and L359V    | 2.86 | 2.70 | 1.74 | 1.59 | 3.53E-04 | 3.55E-04 | 6.76E-02 | 1.25E-01 |
| 8112274 | NM_024930    | ELOVL7        | ELOVL family member 7, elongation of long chain fatty acids (yeast)                 | WT and L359V    | 1.84 | 2.62 | 1.32 | 1.48 | 1.93E-02 | 1.20E-03 | 7.65E-01 | 3.85E-01 |
| 8047248 | NM_001114661 | PLCL1         | phospholipase C-like 1                                                              | WT and L359V    | 1.94 | 2.59 | 1.18 | 1.45 | 5.50E-03 | 5.28E-04 | 8.36E-01 | 3.05E-01 |
| 7927732 | NM_032199    | ARID5B        | AT rich interactive domain 5B (MRF1-like)                                           | WT and L359V    | 1.44 | 2.52 | 1.17 | 1.34 | 2.07E-02 | 9.38E-05 | 8.01E-01 | 2.29E-01 |
| 8101131 | NM_005409    | CXCL11        | chemokine (C-X-C motif) ligand 11                                                   | WT and L359V    | 1.94 | 2.52 | 1.41 | 1.61 | 3.00E-02 | 4.12E-03 | 7.50E-01 | 3.68E-01 |
| 8145293 | NM_014265    | ADAM28        | ADAM metalloproteinase domain 28                                                    | WT and L359V    | 1.89 | 2.48 | 1.28 | 1.40 | 1.56E-02 | 1.73E-03 | 8.02E-01 | 5.52E-01 |
| 8029914 | NM_018485    | GPR77         | G protein-coupled receptor 77                                                       | WT and L359V    | 2.74 | 2.33 | 1.71 | 1.70 | 2.96E-03 | 4.99E-03 | 3.02E-01 | 2.61E-01 |
| 7979269 | NM_000161    | GCH1          | GTP cyclohydrolase 1                                                                | WT and L359V    | 1.63 | 2.30 | 1.06 | 1.31 | 2.68E-02 | 1.16E-03 | 9.52E-01 | 6.27E-01 |
| 8151512 | NM_018440    | PAG1          | phosphoprotein associated with glycosphingolipid microdomains 1                     | WT and L359V    | 1.55 | 2.29 | 1.22 | 1.38 | 3.50E-03 | 6.68E-05 | 4.96E-01 | 7.78E-02 |
| 7942204 | NM_005231    | CTTN          | cortactin                                                                           | WT and L359V    | 2.00 | 2.28 | 1.18 | 1.44 | 9.05E-03 | 2.55E-03 | 8.61E-01 | 4.42E-01 |
| 8098611 | NM_003265    | TLR3          | toil-like receptor 3                                                                | WT and L359V    | 2.03 | 2.27 | 1.34 | 1.44 | 1.87E-02 | 6.48E-03 | 8.01E-01 | 6.27E-01 |
| 7933228 | NM_001002265 | MARCH8        | membrane-associated ring finger (C3HC4) 8                                           | WT and L359V    | 2.74 | 2.25 | 1.51 | 1.62 | 1.61E-04 | 4.07E-04 | 1.24E-01 | 5.67E-02 |
| 8118945 | NM_006238    | PPARD         | peroxisome proliferator-activated receptor delta                                    | WT and L359V    | 1.75 | 2.24 | 0.97 | 1.31 | 3.06E-03 | 2.76E-04 | 9.72E-01 | 3.28E-01 |
| 8124828 | NM_005803    | FLOT1         | flotillin 1                                                                         | WT and L359V    | 2.02 | 2.22 | 1.29 | 1.40 | 5.06E-03 | 1.74E-03 | 7.46E-01 | 4.11E-01 |
| 8178419 | NM_005803    | FLOT1         | flotillin 1                                                                         | WT and L359V    | 2.02 | 2.22 | 1.29 | 1.40 | 5.06E-03 | 1.74E-03 | 7.46E-01 | 4.11E-01 |
| 8179688 | NM_005803    | FLOT1         | flotillin 1                                                                         | WT and L359V    | 2.02 | 2.22 | 1.29 | 1.40 | 5.06E-03 | 1.74E-03 | 7.46E-01 | 4.11E-01 |
| 8156848 | NM_173198    | NR4A3         | nuclear receptor subfamily 4, group A, member 3                                     | WT and L359V    | 2.03 | 2.21 | 1.55 | 1.49 | 2.51E-03 | 8.70E-04 | 1.53E-01 | 1.74E-01 |
| 8129573 | NM_015529    | MOXD1         | monooxygenase, DBH-like 1                                                           | WT and L359V    | 1.77 | 2.21 | 1.21 | 1.35 | 9.83E-03 | 1.11E-03 | 8.13E-01 | 4.43E-01 |
| 8040365 | NM_021643    | TRIB2         | tribbles homolog 2 (Drosophila)                                                     | WT and L359V    | 2.31 | 2.19 | 1.35 | 1.41 | 3.09E-04 | 3.12E-04 | 2.93E-01 | 1.46E-01 |
| 7899821 | NM_020888    | KIAA1522      | KIAA1522                                                                            | WT and L359V    | 1.88 | 2.16 | 1.32 | 1.41 | 5.56E-03 | 1.27E-03 | 6.27E-01 | 3.19E-01 |
| 8164833 | NM_021996    | GBGT1         | globoside alpha-1,3-N-acetylgalactosaminyltransferase 1                             | WT and L359V    | 2.03 | 2.16 | 1.36 | 1.45 | 4.00E-03 | 1.68E-03 | 5.51E-01 | 3.05E-01 |
| 8022728 | NM_024421    | DSC1          | desmocollin 1                                                                       | WT and L359V    | 2.82 | 2.16 | 1.10 | 1.47 | 1.08E-03 | 3.62E-03 | 9.22E-01 | 3.64E-01 |
| 7944803 | NM_001130142 | VWA5A         | von Willebrand factor A domain containing 5A                                        | WT and L359V    | 1.88 | 2.14 | 0.83 | 1.26 | 1.50E-02 | 4.06E-03 | 8.44E-01 | 9.32E-01 |
| 7903092 | NM_001024948 | FNBP1L        | formin binding protein 1-like                                                       | WT and L359V    | 1.83 | 2.13 | 1.38 | 1.42 | 1.52E-03 | 2.89E-04 | 1.86E-01 | 1.11E-01 |
| 8099912 | BC008502     | C4orf34       | chromosome 4 open reading frame 34                                                  | WT and L359V    | 2.31 | 2.12 | 1.32 | 1.51 | 8.12E-04 | 9.66E-04 | 5.21E-01 | 1.42E-01 |
| 8068788 | NM_018961    | UBASH3A       | ubiquitin associated and SH3 domain containing, A                                   | WT and L359V    | 1.45 | 2.11 | 1.08 | 1.32 | 4.98E-02 | 1.11E-03 | 9.13E-01 | 4.56E-01 |
| 8095854 | NM_018243    | SEPT11        | septin 11                                                                           | WT and L359V    | 1.39 | 2.10 | 1.05 | 1.32 | 3.72E-02 | 3.91E-04 | 9.40E-01 | 2.78E-01 |
| 8060461 | NM_080751    | TMC2          | transmembrane channel-like 2                                                        | WT and L359V    | 1.47 | 2.09 | 1.03 | 1.28 | 9.39E-03 | 1.96E-04 | 9.55E-01 | 2.78E-01 |
| 8043945 | NM_145686    | MAP4K4        | mitogen-activated protein kinase kinase kinase kinase 4                             | WT and L359V    | 1.50 | 2.09 | 1.11 | 1.27 | 9.57E-03 | 2.73E-04 | 8.56E-01 | 3.37E-01 |

|         |              |              |                                                                                 |              |      |      |      |      |          |          |          |          |
|---------|--------------|--------------|---------------------------------------------------------------------------------|--------------|------|------|------|------|----------|----------|----------|----------|
| 7969256 | NR_002793    | LOC220115    | TPTE pseudogene                                                                 | WT and L359V | 1.74 | 2.08 | 1.00 | 1.31 | 7.41E-03 | 1.12E-03 | 1.00E+00 | 4.91E-01 |
| 7922474 | BC111699     | KIAA0040     | KIAA0040                                                                        | WT and L359V | 4.68 | 2.08 | 1.85 | 1.78 | 7.07E-04 | 2.45E-02 | 3.41E-01 | 3.10E-01 |
| 7996908 | NM_006750    | SNTB2        | syntrophin, beta 2 (dystrophin-associated protein A1, 59kDa, basic component 2) | WT and L359V | 2.13 | 2.07 | 1.38 | 1.42 | 1.81E-03 | 1.49E-03 | 4.33E-01 | 2.78E-01 |
| 8109908 | AK093725     | LOC257358    | hypothetical protein LOC257358                                                  | WT and L359V | 1.96 | 2.07 | 1.57 | 1.50 | 3.64E-03 | 1.61E-03 | 1.51E-01 | 1.79E-01 |
| 7915682 | NM_020883    | ZSWIM5       | zinc finger, SWIM-type containing 5                                             | WT and L359V | 1.75 | 2.06 | 1.35 | 1.42 | 3.50E-03 | 5.59E-04 | 3.41E-01 | 1.52E-01 |
| 7966829 | NM_018639    | WSB2         | WD repeat and SOCS box-containing 2                                             | WT and L359V | 2.06 | 2.06 | 1.22 | 1.38 | 1.33E-02 | 8.90E-03 | 8.48E-01 | 6.95E-01 |
| 7928671 | BC022252     | C10orf57     | chromosome 10 open reading frame 57                                             | WT and L359V | 1.72 | 2.06 | 1.12 | 1.33 | 2.39E-03 | 3.55E-04 | 8.41E-01 | 2.18E-01 |
| 8114050 | NM_015146    | SEPT8        | septin 8                                                                        | WT and L359V | 2.42 | 2.04 | 1.41 | 1.52 | 2.54E-04 | 5.59E-04 | 2.00E-01 | 7.35E-02 |
| 8133167 | NM_153033    | KCTD7        | potassium channel tetramerisation domain containing 7                           | WT and L359V | 2.03 | 2.03 | 1.32 | 1.37 | 1.69E-03 | 1.15E-03 | 5.07E-01 | 3.05E-01 |
| 8106978 | NM_001131065 | RFESD        | Rieske (Fe-S) domain containing                                                 | WT and L359V | 1.67 | 2.03 | 1.48 | 1.39 | 1.37E-02 | 1.74E-03 | 2.35E-01 | 3.17E-01 |
| 7929072 | NM_012420    | IFIT5        | interferon-induced protein with tetratricopeptide repeats 5                     | WT and L359V | 1.91 | 2.02 | 0.93 | 1.29 | 2.63E-02 | 1.25E-02 | 9.51E-01 | 9.45E-01 |
| 8136115 | NM_020704    | FAM40B       | family with sequence similarity 40, member B                                    | WT and L359V | 1.58 | 2.01 | 1.07 | 1.28 | 3.33E-02 | 2.95E-03 | 9.37E-01 | 7.02E-01 |
| 7904907 | NM_004326    | BCL9         | B-cell CLL                                                                      | WT and L359V | 1.75 | 2.01 | 1.29 | 1.30 | 2.96E-03 | 5.62E-04 | 4.49E-01 | 3.37E-01 |
| 7955441 | NM_014033    | METTL7A      | methyltransferase like 7A                                                       | WT and L359V | 2.32 | 2.01 | 1.61 | 1.60 | 4.21E-04 | 8.19E-04 | 5.45E-02 | 5.50E-02 |
| 8012464 | XM_001724933 | LOC100128288 | hypothetical protein LOC100128288                                               | WT and L359V | 1.53 | 2.00 | 1.12 | 1.26 | 2.86E-02 | 1.72E-03 | 8.77E-01 | 6.53E-01 |
| 8059350 | NM_001039569 | AP1S3        | adaptor-related protein complex 1, sigma 3 subunit                              | WT and L359V | 2.88 | 1.96 | 1.09 | 1.42 | 3.49E-03 | 2.26E-02 | 9.49E-01 | 7.37E-01 |
| 7897441 | NM_004285    | H6PD         | hexose-6-phosphate dehydrogenase (glucose 1-dehydrogenase)                      | WT and L359V | 1.95 | 1.96 | 1.47 | 1.45 | 1.77E-03 | 1.12E-03 | 1.65E-01 | 1.52E-01 |
| 8170921 | NM_017514    | PLXNA3       | plexin A3                                                                       | WT and L359V | 1.52 | 1.96 | 1.18 | 1.28 | 4.58E-02 | 3.33E-03 | 8.38E-01 | 6.81E-01 |
| 7968015 | NM_148957    | TNFRSF19     | tumor necrosis factor receptor superfamily, member 19                           | WT and L359V | 1.80 | 1.95 | 1.08 | 1.33 | 1.26E-02 | 4.33E-03 | 9.28E-01 | 5.96E-01 |
| 7906767 | NM_201563    | FCGR2C       | Fc fragment of IgG, low affinity IIc, receptor for (CD32)                       | WT and L359V | 1.84 | 1.95 | 1.33 | 1.35 | 8.03E-03 | 3.37E-03 | 6.32E-01 | 4.73E-01 |
| 8019954 | NR_024101    | FLJ35776     | hypothetical LOC649446                                                          | WT and L359V | 1.60 | 1.95 | 1.32 | 1.36 | 1.42E-02 | 1.55E-03 | 4.96E-01 | 3.17E-01 |
| 8143327 | NM_022750    | PARP12       | poly (ADP-ribose) polymerase family, member 12                                  | WT and L359V | 1.70 | 1.94 | 1.21 | 1.33 | 1.41E-02 | 3.19E-03 | 8.16E-01 | 5.10E-01 |
| 7950501 | NM_030792    | GDPD5        | glycerophosphodiester phosphodiesterase domain containing 5                     | WT and L359V | 1.77 | 1.90 | 1.58 | 1.41 | 6.27E-03 | 2.42E-03 | 1.07E-01 | 2.70E-01 |
| 7899870 | NM_152493    | ZNF362       | zinc finger protein 362                                                         | WT and L359V | 1.80 | 1.90 | 1.20 | 1.34 | 6.24E-03 | 2.70E-03 | 8.13E-01 | 4.03E-01 |
| 8122660 | NM_005715    | UST          | uronyl-2-sulfotransferase                                                       | WT and L359V | 1.47 | 1.88 | 1.10 | 1.25 | 3.38E-02 | 2.05E-03 | 8.86E-01 | 6.27E-01 |
| 8102513 | ---          | ---          | ---                                                                             | WT and L359V | 2.44 | 1.88 | 1.33 | 1.48 | 5.54E-03 | 2.15E-02 | 8.02E-01 | 5.33E-01 |
| 7932214 | NM_001039844 | ACBD7        | acyl-Coenzyme A binding domain containing 7                                     | WT and L359V | 2.05 | 1.88 | 1.47 | 1.50 | 3.91E-03 | 4.99E-03 | 3.52E-01 | 2.43E-01 |
| 8002618 | NM_017530    | ZNF821       | zinc finger protein 821                                                         | WT and L359V | 1.76 | 1.88 | 1.24 | 1.37 | 9.30E-03 | 3.64E-03 | 7.86E-01 | 3.85E-01 |
| 7932227 | NM_004808    | NMT2         | N-myristoyltransferase 2                                                        | WT and L359V | 1.64 | 1.87 | 1.26 | 1.33 | 6.59E-03 | 1.20E-03 | 5.76E-01 | 3.05E-01 |
| 8170119 | NM_001449    | FHL1         | four and a half LIM domains 1                                                   | WT and L359V | 2.26 | 1.87 | 1.59 | 1.51 | 7.19E-03 | 1.87E-02 | 4.14E-01 | 4.27E-01 |
| 8154962 | NM_001135004 | DNAJB5       | DnaJ (Hsp40) homolog, subfamily B, member 5                                     | WT and L359V | 1.53 | 1.86 | 1.31 | 1.26 | 7.25E-03 | 6.50E-04 | 2.90E-01 | 3.40E-01 |
| 8138977 | NM_015283    | DPY19L1      | dpy-19-like 1 (C. elegans)                                                      | WT and L359V | 1.52 | 1.84 | 1.14 | 1.29 | 4.09E-03 | 3.55E-04 | 7.84E-01 | 1.94E-01 |
| 8139121 | Y00790       | TARP         | TCR gamma alternate reading frame protein                                       | WT and L359V | 1.69 | 1.84 | 1.17 | 1.21 | 2.17E-02 | 7.51E-03 | 8.48E-01 | 9.88E-01 |
| 8058570 | NM_152519    | C2orf67      | chromosome 2 open reading frame 67                                              | WT and L359V | 1.87 | 1.84 | 1.28 | 1.37 | 9.32E-04 | 7.33E-04 | 3.90E-01 | 1.36E-01 |
| 8036503 | NM_170604    | RASGRP4      | RAS guanyl releasing protein 4                                                  | WT and L359V | 1.75 | 1.83 | 1.18 | 1.19 | 1.54E-02 | 7.43E-03 | 8.40E-01 | 1.00E+00 |
| 7910694 | NM_080738    | EDARADD      | EDAR-associated death domain                                                    | WT and L359V | 1.59 | 1.83 | 1.05 | 1.27 | 2.57E-02 | 5.11E-03 | 9.57E-01 | 7.06E-01 |
| 8095343 | NM_012108    | STAP1        | signal transducing adaptor family member 1                                      | WT and L359V | 2.16 | 1.82 | 1.26 | 1.41 | 4.79E-04 | 1.38E-03 | 5.44E-01 | 1.52E-01 |
| 8047078 | NM_017694    | MFSD6        | major facilitator superfamily domain containing 6                               | WT and L359V | 1.68 | 1.82 | 1.14 | 1.33 | 3.88E-02 | 1.48E-02 | 8.90E-01 | 7.09E-01 |
| 7960757 | NM_016546    | C1RL         | complement component 1, r subcomponent-like                                     | WT and L359V | 1.71 | 1.81 | 1.27 | 1.31 | 7.40E-03 | 3.02E-03 | 6.52E-01 | 4.40E-01 |
| 7915775 | NM_005897    | IPP          | intracisternal A particle-promoted polypeptide                                  | WT and L359V | 1.98 | 1.79 | 1.11 | 1.31 | 1.23E-02 | 1.84E-02 | 9.15E-01 | 8.14E-01 |
| 8032576 | NM_198969    | AES          | amino-terminal enhancer of split                                                | WT and L359V | 1.49 | 1.79 | 1.28 | 1.29 | 3.70E-02 | 4.08E-03 | 6.75E-01 | 5.41E-01 |
| 8092358 | NM_015078    | MCF2L2       | MCF.2 cell line derived transforming sequence-like 2                            | WT and L359V | 1.33 | 1.79 | 1.17 | 1.26 | 4.49E-02 | 8.36E-04 | 7.46E-01 | 3.25E-01 |
| 8062623 | NM_002660    | PLCG1        | phospholipase C, gamma 1                                                        | WT and L359V | 1.57 | 1.78 | 1.10 | 1.23 | 1.81E-03 | 3.11E-04 | 8.26E-01 | 2.78E-01 |
| 8074780 | NM_013313    | YPEL1        | yippee-like 1 (Drosophila)                                                      | WT and L359V | 1.55 | 1.78 | 1.25 | 1.35 | 4.81E-02 | 9.86E-03 | 8.01E-01 | 5.54E-01 |
| 7928999 | NM_001102469 | LIPN         | lipase, family member N                                                         | WT and L359V | 1.56 | 1.78 | 1.26 | 1.40 | 3.18E-02 | 6.88E-03 | 7.53E-01 | 3.37E-01 |
| 7908917 | NM_006763    | BTG2         | BTG family, member 2                                                            | WT and L359V | 1.45 | 1.77 | 1.02 | 1.15 | 2.02E-02 | 1.57E-03 | 9.84E-01 | 9.78E-01 |
| 7952305 | XR_018777    | LOC283155    | hypothetical LOC283155                                                          | WT and L359V | 1.86 | 1.76 | 1.28 | 1.34 | 7.28E-03 | 8.02E-03 | 7.40E-01 | 4.98E-01 |
| 8083166 | NM_003304    | TRPC1        | transient receptor potential cation channel, subfamily C, member 1              | WT and L359V | 1.81 | 1.76 | 1.24 | 1.37 | 4.79E-04 | 4.56E-04 | 3.88E-01 | 7.78E-02 |
| 8089261 | NM_170662    | CBLB         | Cas-Br-M (murine) ecotropic retroviral transforming sequence b                  | WT and L359V | 1.36 | 1.76 | 1.12 | 1.22 | 4.26E-02 | 1.40E-03 | 8.38E-01 | 5.88E-01 |
| 8123080 | NM_001009991 | SYTL3        | synaptotagmin-like 3                                                            | WT and L359V | 1.62 | 1.75 | 1.19 | 1.35 | 4.02E-02 | 1.47E-02 | 8.41E-01 | 6.04E-01 |
| 8023926 | NM_032510    | PARD6G       | par-6 partitioning defective 6 homolog gamma (C. elegans)                       | WT and L359V | 1.64 | 1.74 | 1.07 | 1.25 | 8.77E-03 | 3.28E-03 | 9.19E-01 | 5.96E-01 |
| 8162216 | NM_016848    | SHC3         | SHC (Src homology 2 domain containing) transforming protein 3                   | WT and L359V | 1.39 | 1.74 | 1.07 | 1.18 | 2.23E-02 | 9.66E-04 | 9.05E-01 | 6.57E-01 |
| 7987385 | NM_172316    | MEIS2        | Meis homeobox 2                                                                 | WT and L359V | 2.00 | 1.73 | 1.37 | 1.34 | 4.30E-04 | 1.06E-03 | 1.57E-01 | 1.57E-01 |
| 7909954 | NM_032890    | DISP1        | dispatched homolog 1 (Drosophila)                                               | WT and L359V | 1.38 | 1.73 | 1.16 | 1.21 | 2.53E-02 | 1.08E-03 | 7.73E-01 | 5.09E-01 |
| 8164464 | NM_006336    | ZER1         | zer-1 homolog (C. elegans)                                                      | WT and L359V | 1.26 | 1.73 | 1.03 | 1.15 | 4.11E-02 | 3.69E-04 | 9.48E-01 | 6.57E-01 |
| 8073072 | NM_152426    | APOBEC3D     | apolipoprotein B mRNA editing enzyme, catalytic polypeptide-like 3D             | WT and L359V | 1.77 | 1.73 | 1.19 | 1.31 | 4.60E-04 | 4.00E-04 | 5.20E-01 | 1.10E-01 |
| 8150036 | NM_015254    | KIF13B       | kinesin family member 13B                                                       | WT and L359V | 1.38 | 1.72 | 1.14 | 1.22 | 3.53E-02 | 1.89E-03 | 8.31E-01 | 5.72E-01 |
| 8083876 | NM_005414    | SKIL         | SKI-like oncogene                                                               | WT and L359V | 1.83 | 1.72 | 1.18 | 1.37 | 7.02E-03 | 8.41E-03 | 8.34E-01 | 4.02E-01 |
| 8014248 | NM_144682    | SLFN13       | schlafen family member 13                                                       | WT and L359V | 1.46 | 1.72 | 1.12 | 1.27 | 1.52E-02 | 1.71E-03 | 8.41E-01 | 3.49E-01 |
| 8127051 | NM_012288    | TRAM2        | translocation associated membrane protein 2                                     | WT and L359V | 1.31 | 1.72 | 1.16 | 1.18 | 3.29E-02 | 7.04E-04 | 7.40E-01 | 5.57E-01 |
| 8095870 | NM_004354    | CCNG2        | cyclin G2                                                                       | WT and L359V | 1.60 | 1.71 | 1.24 | 1.32 | 4.18E-03 | 1.32E-03 | 5.30E-01 | 2.11E-01 |
| 8097288 | NM_024582    | FAT4         | FAT tumor suppressor homolog 4 (Drosophila)                                     | WT and L359V | 1.54 | 1.71 | 1.11 | 1.26 | 3.49E-03 | 7.05E-04 | 8.31E-01 | 2.63E-01 |
| 7963670 | NM_006301    | MAP3K12      | mitogen-activated protein kinase kinase kinase 12                               | WT and L359V | 1.46 | 1.71 | 1.18 | 1.19 | 3.87E-02 | 5.12E-03 | 8.20E-01 | 8.90E-01 |
| 8079117 | NM_001296    | CCBP2        | chemokine binding protein 2                                                     | WT and L359V | 1.42 | 1.70 | 1.09 | 1.19 | 3.29E-02 | 3.05E-03 | 8.85E-01 | 8.13E-01 |
| 7902282 | NM_001036645 | HHLA3        | HERV-H LTR-associating 3                                                        | WT and L359V | 1.51 | 1.70 | 1.13 | 1.21 | 4.29E-02 | 9.35E-03 | 8.76E-01 | 9.23E-01 |

|         |              |              |                                                                        |              |      |      |      |      |          |          |          |          |
|---------|--------------|--------------|------------------------------------------------------------------------|--------------|------|------|------|------|----------|----------|----------|----------|
| 8107270 | NM_033035    | TSLP         | thymic stromal lymphopoietin                                           | WT and L359V | 1.59 | 1.70 | 1.29 | 1.33 | 1.07E-02 | 3.66E-03 | 5.15E-01 | 3.13E-01 |
| 8167322 | NM_017883    | WDR13        | WD repeat domain 13                                                    | WT and L359V | 1.38 | 1.69 | 1.14 | 1.21 | 4.11E-02 | 2.76E-03 | 8.36E-01 | 6.69E-01 |
| 8073081 | NM_145298    | APOBEC3F     | apolipoprotein B mRNA editing enzyme, catalytic polypeptide-like 3F    | WT and L359V | 1.65 | 1.69 | 1.16 | 1.23 | 3.06E-03 | 1.59E-03 | 7.92E-01 | 4.58E-01 |
| 7927876 | NM_030625    | TET1         | tet oncogene 1                                                         | WT and L359V | 1.56 | 1.69 | 1.35 | 1.32 | 6.93E-03 | 2.10E-03 | 2.37E-01 | 2.54E-01 |
| 7961767 | AK295862     | KIAA0528     | KIAA0528                                                               | WT and L359V | 1.83 | 1.68 | 0.82 | 1.20 | 2.08E-03 | 3.34E-03 | 7.23E-01 | 7.15E-01 |
| 7928855 | NM_004329    | BMPR1A       | bone morphogenetic protein receptor, type IA                           | WT and L359V | 1.80 | 1.68 | 1.24 | 1.32 | 6.62E-03 | 8.57E-03 | 7.67E-01 | 4.73E-01 |
| 7975203 | NM_022474    | MPP5         | membrane protein, palmitoylated 5 (MAGUK p55 subfamily member 5)       | WT and L359V | 1.50 | 1.68 | 1.01 | 1.22 | 2.74E-02 | 6.17E-03 | 9.95E-01 | 7.45E-01 |
| 7915718 | NM_007170    | TESK2        | testis-specific kinase 2                                               | WT and L359V | 1.49 | 1.67 | 1.24 | 1.33 | 2.68E-02 | 5.35E-03 | 7.19E-01 | 3.58E-01 |
| 7943413 | NM_001165    | BIRC3        | baculoviral IAP repeat-containing 3                                    | WT and L359V | 1.58 | 1.67 | 1.35 | 1.33 | 1.66E-02 | 6.89E-03 | 4.46E-01 | 4.03E-01 |
| 8003962 | NM_002663    | PLD2         | phospholipase D2                                                       | WT and L359V | 1.71 | 1.67 | 1.38 | 1.32 | 1.91E-02 | 1.68E-02 | 5.47E-01 | 6.27E-01 |
| 7905909 | NM_005227    | EFNA4        | ephrin-A4                                                              | WT and L359V | 1.79 | 1.67 | 1.43 | 1.34 | 7.93E-03 | 1.01E-02 | 3.63E-01 | 4.56E-01 |
| 8106602 | NM_014733    | ZFYVE16      | zinc finger, FYVE domain containing 16                                 | WT and L359V | 1.79 | 1.67 | 1.21 | 1.32 | 8.82E-03 | 1.13E-02 | 8.13E-01 | 5.28E-01 |
| 7953547 | NM_001007026 | ATN1         | atrophin 1                                                             | WT and L359V | 1.32 | 1.66 | 1.09 | 1.16 | 2.40E-02 | 7.04E-04 | 8.52E-01 | 6.27E-01 |
| 8020684 | NM_021624    | HRH4         | histamine receptor H4                                                  | WT and L359V | 1.88 | 1.66 | 1.41 | 1.31 | 1.51E-02 | 3.01E-02 | 6.04E-01 | 7.88E-01 |
| 8114030 | NM_007054    | KIF3A        | kinesin family member 3A                                               | WT and L359V | 2.60 | 1.66 | 1.32 | 1.51 | 5.80E-04 | 1.23E-02 | 6.12E-01 | 1.85E-01 |
| 7951408 | NM_052889    | CARD16       | caspase recruitment domain family, member 16                           | WT and L359V | 2.22 | 1.66 | 1.10 | 1.34 | 8.31E-03 | 4.95E-02 | 9.29E-01 | 8.13E-01 |
| 7910706 | NM_006499    | LGALS8       | lectin, galactoside-binding, soluble, 8                                | WT and L359V | 1.46 | 1.66 | 1.19 | 1.26 | 2.86E-02 | 4.99E-03 | 7.99E-01 | 5.54E-01 |
| 8047187 | NM_001080539 | CCDC150      | coiled-coil domain containing 150                                      | WT and L359V | 1.58 | 1.65 | 0.86 | 1.23 | 3.53E-02 | 1.71E-02 | 8.58E-01 | 9.07E-01 |
| 8142270 | NM_001037132 | NRCAM        | neuronal cell adhesion molecule                                        | WT and L359V | 1.62 | 1.65 | 1.07 | 1.25 | 8.03E-03 | 4.44E-03 | 9.17E-01 | 5.69E-01 |
| 8021635 | NM_002575    | SERPINB2     | serpin peptidase inhibitor, clade B (ovalbumin), member 2              | WT and L359V | 1.57 | 1.65 | 1.72 | 1.27 | 2.64E-02 | 1.16E-02 | 6.76E-02 | 6.64E-01 |
| 8025612 | NM_022377    | ICAM4        | intercellular adhesion molecule 4 (Landsteiner-Wiener blood group)     | WT and L359V | 1.63 | 1.65 | 1.25 | 1.30 | 2.67E-02 | 1.71E-02 | 7.91E-01 | 6.55E-01 |
| 7959657 | NM_012463    | ATP6V0A2     | ATPase, H+ transporting, lysosomal V0 subunit a2                       | WT and L359V | 1.83 | 1.65 | 1.19 | 1.29 | 4.77E-04 | 9.66E-04 | 5.66E-01 | 1.85E-01 |
| 8009243 | NM_001085423 | C17orf60     | chromosome 17 open reading frame 60                                    | WT and L359V | 2.17 | 1.65 | 1.27 | 1.38 | 6.40E-03 | 3.62E-02 | 8.09E-01 | 6.07E-01 |
| 8024566 | ---          | ---          | ---                                                                    | WT and L359V | 1.40 | 1.65 | 1.18 | 1.23 | 2.66E-02 | 2.58E-03 | 7.47E-01 | 4.88E-01 |
| 8179595 | NM_001470    | GABBR1       | gamma-aminobutyric acid (GABA) B receptor, 1                           | WT and L359V | 1.52 | 1.65 | 1.25 | 1.30 | 1.71E-02 | 4.99E-03 | 6.65E-01 | 4.07E-01 |
| 7972177 | NM_006237    | POU4F1       | POU class 4 homeobox 1                                                 | WT and L359V | 1.50 | 1.64 | 1.09 | 1.28 | 8.11E-03 | 1.89E-03 | 8.76E-01 | 2.81E-01 |
| 8133155 | NM_003596    | TPST1        | tyrosylprotein sulfotransferase 1                                      | WT and L359V | 1.68 | 1.64 | 1.15 | 1.25 | 3.79E-03 | 3.22E-03 | 8.14E-01 | 4.78E-01 |
| 8178298 | NM_001470    | GABBR1       | gamma-aminobutyric acid (GABA) B receptor, 1                           | WT and L359V | 1.47 | 1.64 | 1.26 | 1.29 | 1.73E-02 | 3.40E-03 | 5.36E-01 | 3.32E-01 |
| 8057377 | NM_173648    | CCDC141      | coiled-coil domain containing 141                                      | WT and L359V | 1.63 | 1.64 | 1.35 | 1.32 | 1.61E-02 | 1.12E-02 | 5.08E-01 | 4.98E-01 |
| 8171901 | NM_152787    | MAP3K7IP3    | mitogen-activated protein kinase kinase kinase 7 interacting protein 3 | WT and L359V | 1.42 | 1.63 | 1.03 | 1.17 | 5.06E-03 | 5.28E-04 | 9.43E-01 | 4.93E-01 |
| 8058670 | NM_016260    | IKZF2        | IKAROS family zinc finger 2 (Helios)                                   | WT and L359V | 1.78 | 1.63 | 1.74 | 1.33 | 1.51E-02 | 2.46E-02 | 1.09E-01 | 6.27E-01 |
| 8030128 | NM_014330    | PPP1R15A     | protein phosphatase 1, regulatory (inhibitor) subunit 15A              | WT and L359V | 1.52 | 1.63 | 1.26 | 1.26 | 9.97E-03 | 3.22E-03 | 5.15E-01 | 4.23E-01 |
| 7935011 | NM_014912    | CPEB3        | cytoplasmic polyadenylation element binding protein 3                  | WT and L359V | 1.36 | 1.62 | 1.10 | 1.20 | 3.79E-02 | 2.87E-03 | 8.64E-01 | 6.53E-01 |
| 8116831 | AK092393     | LOC100130275 | hypothetical protein LOC100130275                                      | WT and L359V | 1.73 | 1.62 | 1.28 | 1.32 | 1.53E-03 | 2.03E-03 | 3.44E-01 | 1.74E-01 |
| 7984124 | NM_031301    | APH1B        | anterior pharynx defective 1 homolog B (C. elegans)                    | WT and L359V | 1.65 | 1.61 | 1.26 | 1.35 | 7.96E-03 | 7.02E-03 | 6.44E-01 | 3.05E-01 |
| 7898677 | NM_004807    | HS6ST1       | heparan sulfate 6-O-sulfotransferase 1                                 | WT and L359V | 1.43 | 1.61 | 1.38 | 1.23 | 1.27E-02 | 2.05E-03 | 1.23E-01 | 4.19E-01 |
| 8161044 | NM_003289    | TPM2         | tropomyosin 2 (beta)                                                   | WT and L359V | 1.44 | 1.61 | 1.30 | 1.25 | 1.89E-02 | 3.56E-03 | 3.90E-01 | 4.28E-01 |
| 8139118 | ---          | ---          | ---                                                                    | WT and L359V | 1.66 | 1.60 | 1.08 | 1.11 | 1.13E-02 | 1.10E-02 | 9.15E-01 | 1.00E+00 |
| 8159876 | NM_134428    | RFX3         | regulatory factor X, 3 (influences HLA class II expression)            | WT and L359V | 1.44 | 1.60 | 1.14 | 1.30 | 1.54E-02 | 2.87E-03 | 8.20E-01 | 2.71E-01 |
| 8124654 | NM_001470    | GABBR1       | gamma-aminobutyric acid (GABA) B receptor, 1                           | WT and L359V | 1.38 | 1.60 | 1.25 | 1.27 | 2.29E-02 | 2.49E-03 | 4.39E-01 | 3.05E-01 |
| 7913357 | NM_001397    | ECE1         | endothelin converting enzyme 1                                         | WT and L359V | 1.53 | 1.60 | 1.27 | 1.31 | 2.67E-03 | 1.03E-03 | 2.17E-01 | 1.19E-01 |
| 8040552 | NM_147223    | NCOA1        | nuclear receptor coactivator 1                                         | WT and L359V | 1.50 | 1.59 | 1.02 | 1.14 | 1.64E-02 | 5.91E-03 | 9.84E-01 | 1.00E+00 |
| 8142136 | NM_175884    | FLJ36031     | hypothetical protein FLJ36031                                          | WT and L359V | 1.34 | 1.59 | 1.03 | 1.17 | 2.10E-02 | 1.44E-03 | 9.57E-01 | 6.39E-01 |
| 7979223 | NM_030637    | DDHD1        | DDHD domain containing 1                                               | WT and L359V | 1.27 | 1.59 | 0.97 | 1.17 | 4.73E-02 | 1.20E-03 | 9.58E-01 | 5.75E-01 |
| 8092392 | NM_130446    | KLHL6        | kelch-like 6 (Drosophila)                                              | WT and L359V | 1.66 | 1.58 | 1.18 | 1.25 | 8.92E-03 | 9.66E-03 | 8.14E-01 | 6.27E-01 |
| 8027604 | NM_014686    | KIAA0355     | KIAA0355                                                               | WT and L359V | 1.43 | 1.58 | 1.12 | 1.21 | 3.18E-02 | 6.74E-03 | 8.59E-01 | 6.95E-01 |
| 7937852 | NM_002555    | SLC22A18     | solute carrier family 22, member 18                                    | WT and L359V | 1.39 | 1.58 | 1.14 | 1.20 | 2.09E-02 | 2.89E-03 | 8.09E-01 | 5.70E-01 |
| 7990033 | NM_005078    | TLE3         | transducin-like enhancer of split 3 (E(sp1) homolog, Drosophila)       | WT and L359V | 1.52 | 1.58 | 1.31 | 1.21 | 7.02E-03 | 3.19E-03 | 2.93E-01 | 5.69E-01 |
| 8162533 | NM_001083603 | PTCH1        | patched homolog 1 (Drosophila)                                         | WT and L359V | 1.42 | 1.58 | 1.07 | 1.21 | 2.03E-02 | 3.86E-03 | 8.97E-01 | 5.91E-01 |
| 8056005 | NM_001105    | ACVR1        | activin A receptor, type I                                             | WT and L359V | 1.59 | 1.58 | 1.06 | 1.22 | 2.26E-02 | 1.71E-02 | 9.40E-01 | 8.46E-01 |
| 8065798 | NM_178026    | GGT7         | gamma-glutamyltransferase 7                                            | WT and L359V | 1.67 | 1.57 | 1.33 | 1.31 | 1.02E-02 | 1.25E-02 | 4.97E-01 | 4.46E-01 |
| 8099696 | NM_153825    | SEPSECS      | Sep (O-phosphoserine) tRNA:Sec (selenocysteine) tRNA synthase          | WT and L359V | 1.49 | 1.57 | 1.15 | 1.29 | 1.24E-02 | 4.61E-03 | 8.13E-01 | 3.28E-01 |
| 8135224 | NM_001085386 | NF-E4        | transcription factor NF-E4                                             | WT and L359V | 1.37 | 1.57 | 1.23 | 1.25 | 1.98E-02 | 2.28E-03 | 4.52E-01 | 3.05E-01 |
| 7929047 | NM_001547    | IFIT2        | interferon-induced protein with tetratricopeptide repeats 2            | WT and L359V | 1.65 | 1.56 | 1.15 | 1.23 | 2.63E-02 | 3.15E-02 | 8.66E-01 | 9.11E-01 |
| 8066303 | NM_032221    | CHD6         | chromodomain helicase DNA binding protein 6                            | WT and L359V | 1.39 | 1.56 | 1.05 | 1.18 | 1.41E-02 | 1.96E-03 | 9.22E-01 | 6.03E-01 |
| 8078227 | NM_003884    | KAT2B        | K(lysine) acetyltransferase 2B                                         | WT and L359V | 1.56 | 1.56 | 0.90 | 1.14 | 3.82E-02 | 2.85E-02 | 8.94E-01 | 1.00E+00 |
| 8047538 | NM_001204    | BMPR2        | bone morphogenetic protein receptor, type II (serine)                  | WT and L359V | 1.66 | 1.56 | 1.02 | 1.14 | 2.14E-02 | 2.85E-02 | 9.85E-01 | 1.00E+00 |
| 7955469 | NM_001039960 | SLC4A8       | solute carrier family 4, sodium bicarbonate cotransporter, member 8    | WT and L359V | 2.00 | 1.56 | 1.34 | 1.25 | 4.00E-04 | 3.22E-03 | 2.00E-01 | 3.40E-01 |
| 8045398 | NM_012233    | RAB3GAP1     | RAB3 GTPase activating protein subunit 1 (catalytic)                   | WT and L359V | 1.40 | 1.56 | 1.23 | 1.32 | 2.24E-02 | 3.68E-03 | 5.61E-01 | 2.17E-01 |
| 8090277 | NM_022776    | OSBPL11      | oxysterol binding protein-like 11                                      | WT and L359V | 1.70 | 1.55 | 1.03 | 1.18 | 2.03E-02 | 3.41E-02 | 9.80E-01 | 1.00E+00 |
| 8005785 | NM_014238    | KSR1         | kinase suppressor of ras 1                                             | WT and L359V | 1.45 | 1.55 | 1.32 | 1.15 | 2.02E-02 | 6.60E-03 | 3.74E-01 | 9.33E-01 |
| 8072279 | NM_153050    | MTMR3        | myotubularin related protein 3                                         | WT and L359V | 1.50 | 1.55 | 1.11 | 1.19 | 1.85E-03 | 8.04E-04 | 8.01E-01 | 3.36E-01 |
| 7940191 | NM_004177    | STX3         | syntaxin 3                                                             | WT and L359V | 1.37 | 1.55 | 0.85 | 1.09 | 3.18E-02 | 4.57E-03 | 7.44E-01 | 1.00E+00 |
| 7969438 | NM_005358    | LMO7         | LIM domain 7                                                           | WT and L359V | 1.71 | 1.54 | 1.27 | 1.31 | 1.22E-02 | 2.41E-02 | 7.38E-01 | 5.52E-01 |
| 8009476 | NM_002758    | MAP2K6       | mitogen-activated protein kinase kinase 6                              | WT and L359V | 1.52 | 1.54 | 1.13 | 1.19 | 1.54E-02 | 9.43E-03 | 8.53E-01 | 8.30E-01 |

|         |              |           |                                                                                  |              |      |      |      |      |          |          |          |          |
|---------|--------------|-----------|----------------------------------------------------------------------------------|--------------|------|------|------|------|----------|----------|----------|----------|
| 8119034 | NM_015695    | BRPF3     | bromodomain and PHD finger containing, 3                                         | WT and L359V | 1.41 | 1.54 | 1.16 | 1.13 | 1.09E-02 | 2.38E-03 | 7.26E-01 | 8.99E-01 |
| 7952445 | NM_024631    | C11orf61  | chromosome 11 open reading frame 61                                              | WT and L359V | 1.38 | 1.54 | 1.10 | 1.15 | 3.95E-02 | 7.47E-03 | 8.79E-01 | 9.41E-01 |
| 7902594 | NM_182948    | PRKACB    | protein kinase, cAMP-dependent, catalytic, beta                                  | WT and L359V | 1.35 | 1.53 | 1.16 | 1.24 | 1.29E-02 | 1.31E-03 | 6.65E-01 | 2.44E-01 |
| 7948470 | NM_004778    | GPR44     | G protein-coupled receptor 44                                                    | WT and L359V | 1.97 | 1.53 | 1.55 | 1.36 | 4.77E-03 | 3.05E-02 | 2.00E-01 | 4.56E-01 |
| 7949400 | NM_182556    | SLC25A45  | solute carrier family 25, member 45                                              | WT and L359V | 1.46 | 1.53 | 1.15 | 1.19 | 1.39E-02 | 4.99E-03 | 8.11E-01 | 6.47E-01 |
| 8032249 | NM_213604    | ADAMTSL5  | ADAMTS-like 5                                                                    | WT and L359V | 1.42 | 1.53 | 1.15 | 1.19 | 3.72E-02 | 1.07E-02 | 8.25E-01 | 8.36E-01 |
| 8055130 | NM_004807    | HS6ST1    | heparan sulfate 6-O-sulfotransferase 1                                           | WT and L359V | 1.37 | 1.53 | 1.33 | 1.19 | 1.38E-02 | 2.10E-03 | 1.39E-01 | 4.97E-01 |
| 8105681 | NM_018695    | ERBB2IP   | erbb2 interacting protein                                                        | WT and L359V | 1.68 | 1.53 | 1.21 | 1.30 | 1.69E-03 | 3.16E-03 | 5.43E-01 | 1.94E-01 |
| 8116992 | ---          | ---       | ---                                                                              | WT and L359V | 1.38 | 1.53 | 1.16 | 1.20 | 2.82E-02 | 5.27E-03 | 7.99E-01 | 6.27E-01 |
| 7959039 | NM_153348    | FBXW8     | F-box and WD repeat domain containing 8                                          | WT and L359V | 1.38 | 1.53 | 1.24 | 1.24 | 1.76E-02 | 2.97E-03 | 4.37E-01 | 3.42E-01 |
| 7906061 | NM_152280    | SYT11     | synaptotagmin XI                                                                 | WT and L359V | 1.59 | 1.52 | 1.27 | 1.23 | 3.95E-02 | 4.41E-02 | 7.79E-01 | 9.27E-01 |
| 7937823 | NM_000218    | KCNQ1     | potassium voltage-gated channel, KQT-like subfamily, member 1                    | WT and L359V | 1.35 | 1.52 | 1.15 | 1.20 | 3.95E-02 | 5.70E-03 | 8.01E-01 | 6.04E-01 |
| 7907893 | NM_001531    | MR1       | major histocompatibility complex, class I-related                                | WT and L359V | 1.51 | 1.52 | 1.08 | 1.23 | 1.43E-02 | 9.65E-03 | 8.97E-01 | 6.07E-01 |
| 8167125 | NM_004651    | USP11     | ubiquitin specific peptidase 11                                                  | WT and L359V | 1.34 | 1.52 | 1.14 | 1.15 | 2.83E-02 | 3.67E-03 | 8.01E-01 | 7.89E-01 |
| 8010426 | NM_020954    | KIAA1618  | KIAA1618                                                                         | WT and L359V | 1.41 | 1.51 | 1.08 | 1.13 | 2.31E-02 | 6.74E-03 | 8.86E-01 | 1.00E+00 |
| 7959786 | NM_023928    | AACS      | acetoacetyl-CoA synthetase                                                       | WT and L359V | 1.39 | 1.51 | 1.24 | 1.23 | 2.31E-02 | 5.03E-03 | 5.15E-01 | 4.41E-01 |
| 8043377 | NM_012477    | WBP1      | WW domain binding protein 1                                                      | WT and L359V | 1.34 | 1.51 | 1.17 | 1.13 | 1.81E-02 | 2.15E-03 | 6.27E-01 | 8.63E-01 |
| 8055711 | NM_004543    | NEB       | nebulin                                                                          | WT and L359V | 1.41 | 1.51 | 1.41 | 1.26 | 1.62E-02 | 4.46E-03 | 9.54E-02 | 3.05E-01 |
| 7909332 | NM_001114752 | CD55      | CD55 molecule, decay accelerating factor for complement (Cromer blood group)     | WT and L359V | 1.68 | 1.51 | 1.31 | 1.33 | 6.54E-03 | 1.40E-02 | 4.65E-01 | 3.25E-01 |
| 7924760 | NM_002221    | ITPKB     | inositol 1,4,5-trisphosphate 3-kinase B                                          | WT and L359V | 1.69 | 1.51 | 1.20 | 1.25 | 5.30E-03 | 1.28E-02 | 7.65E-01 | 5.44E-01 |
| 8131013 | NM_001130965 | UNC84A    | unc-84 homolog A (C. elegans)                                                    | WT and L359V | 1.54 | 1.51 | 1.28 | 1.31 | 4.80E-03 | 3.98E-03 | 3.29E-01 | 1.74E-01 |
| 8138613 | NM_015550    | OSBPL3    | oxysterol binding protein-like 3                                                 | WT and L359V | 1.58 | 1.51 | 1.14 | 1.22 | 5.06E-03 | 6.17E-03 | 8.14E-01 | 5.28E-01 |
| 8052742 | NM_001024680 | FBXO48    | F-box protein 48                                                                 | WT and L359V | 1.79 | 1.51 | 1.18 | 1.36 | 1.13E-02 | 3.97E-02 | 8.41E-01 | 4.56E-01 |
| 8117447 | NM_006995    | BTN2A2    | butyrophilin, subfamily 2, member A2                                             | WT and L359V | 1.30 | 1.50 | 1.11 | 1.19 | 3.10E-02 | 2.57E-03 | 8.21E-01 | 4.76E-01 |
| 8116983 | NM_004233    | CD83      | CD83 molecule                                                                    | WT and L359V | 1.31 | 1.50 | 1.16 | 1.20 | 4.09E-02 | 3.86E-03 | 7.65E-01 | 5.27E-01 |
| 8053599 | NM_012477    | WBP1      | WW domain binding protein 1                                                      | WT and L359V | 1.34 | 1.50 | 1.16 | 1.12 | 1.92E-02 | 2.69E-03 | 7.22E-01 | 8.93E-01 |
| 8108378 | NM_001903    | CTNNA1    | catenin (cadherin-associated protein), alpha 1, 102kDa                           | WT and L359V | 1.69 | 1.50 | 1.11 | 1.29 | 3.41E-03 | 8.81E-03 | 8.64E-01 | 3.24E-01 |
| 8080938 | NM_198159    | MITF      | microphthalmia-associated transcription factor                                   | WT and L359V | 1.95 | 1.50 | 0.85 | 1.19 | 4.43E-04 | 4.61E-03 | 7.12E-01 | 6.13E-01 |
| 8008566 | NM_178509    | STXBP4    | syntaxin binding protein 4                                                       | WT and L359V | 1.46 | 1.50 | 0.95 | 1.15 | 8.03E-03 | 3.84E-03 | 9.27E-01 | 7.88E-01 |
| 8106962 | NM_198150    | ARSK      | arylsulfatase family, member K                                                   | WT and L359V | 1.65 | 1.50 | 1.14 | 1.22 | 1.69E-03 | 3.65E-03 | 7.94E-01 | 4.02E-01 |
| 7957551 | NM_003877    | SOCS2     | suppressor of cytokine signaling 2                                               | WT and L359V | 1.49 | 1.49 | 1.26 | 1.28 | 2.64E-03 | 1.72E-03 | 2.00E-01 | 1.30E-01 |
| 7978492 | NM_015473    | HEATR5A   | HEAT repeat containing 5A                                                        | WT and L359V | 1.51 | 1.49 | 1.27 | 1.20 | 1.23E-02 | 9.86E-03 | 4.85E-01 | 6.58E-01 |
| 8149330 | NM_147780    | CTSB      | cathepsin B                                                                      | WT and L359V | 1.55 | 1.49 | 1.15 | 1.21 | 1.55E-02 | 1.85E-02 | 8.36E-01 | 7.88E-01 |
| 7965652 | NM_002595    | PCTK2     | PCTAIRE protein kinase 2                                                         | WT and L359V | 1.40 | 1.49 | 1.13 | 1.25 | 1.38E-02 | 4.04E-03 | 8.13E-01 | 3.10E-01 |
| 7914184 | NM_000952    | PTAFR     | platelet-activating factor receptor                                              | WT and L359V | 1.93 | 1.49 | 1.06 | 1.18 | 5.66E-04 | 6.22E-03 | 9.22E-01 | 6.55E-01 |
| 8029728 | NM_000164    | GIPIR     | gastric inhibitory polypeptide receptor                                          | WT and L359V | 1.32 | 1.49 | 1.13 | 1.19 | 2.53E-02 | 2.97E-03 | 8.01E-01 | 4.56E-01 |
| 7941714 | NM_024650    | C11orf80  | chromosome 11 open reading frame 80                                              | WT and L359V | 1.41 | 1.49 | 1.16 | 1.22 | 1.38E-02 | 4.42E-03 | 7.62E-01 | 4.39E-01 |
| 8120927 | NM_033411    | RWDD2A    | RWD domain containing 2A                                                         | WT and L359V | 1.90 | 1.48 | 1.25 | 1.35 | 2.39E-03 | 2.04E-02 | 6.90E-01 | 3.10E-01 |
| 8049657 | NM_001040445 | ASB1      | ankyrin repeat and SOCS box-containing 1                                         | WT and L359V | 1.54 | 1.48 | 1.31 | 1.26 | 1.85E-03 | 2.15E-03 | 1.17E-01 | 1.73E-01 |
| 8050702 | NM_004881    | TP53I3    | tumor protein p53 inducible protein 3                                            | WT and L359V | 1.52 | 1.48 | 1.05 | 1.17 | 2.22E-02 | 2.22E-02 | 9.52E-01 | 9.45E-01 |
| 7910198 | BC007286     | MGC15634  | hypothetical protein MGC15634                                                    | WT and L359V | 1.41 | 1.48 | 1.06 | 1.18 | 4.90E-02 | 2.06E-02 | 9.40E-01 | 8.92E-01 |
| 7963313 | NM_007210    | GALNT6    | UDP-N-acetyl-alpha-D-galactosamine:polypeptide N-acetylgalactosaminyltransferase | WT and L359V | 1.56 | 1.47 | 1.22 | 1.19 | 4.81E-03 | 6.74E-03 | 5.72E-01 | 6.07E-01 |
| 8042867 | NM_012477    | WBP1      | WW domain binding protein 1                                                      | WT and L359V | 1.30 | 1.47 | 1.16 | 1.13 | 2.56E-02 | 2.77E-03 | 6.71E-01 | 8.44E-01 |
| 7967117 | NM_003733    | OASL      | 2'-5'-oligoadenylate synthetase-like                                             | WT and L359V | 1.42 | 1.46 | 1.08 | 1.16 | 4.54E-02 | 2.30E-02 | 9.12E-01 | 1.00E+00 |
| 7909011 | NM_002393    | MDM4      | Mdm4 p53 binding protein homolog (mouse)                                         | WT and L359V | 1.77 | 1.46 | 1.42 | 1.43 | 4.95E-03 | 2.48E-02 | 2.46E-01 | 1.82E-01 |
| 8109576 | NM_017872    | THG1L     | tRNA-histidine guanylyltransferase 1-like (S. cerevisiae)                        | WT and L359V | 1.51 | 1.46 | 1.13 | 1.28 | 4.95E-03 | 5.10E-03 | 8.11E-01 | 2.23E-01 |
| 8087985 | NM_001010983 | GLT8D1    | glycosyltransferase 8 domain containing 1                                        | WT and L359V | 1.54 | 1.46 | 1.27 | 1.28 | 1.64E-02 | 2.23E-02 | 6.11E-01 | 4.81E-01 |
| 7980005 | NM_001005743 | NUMB      | numb homolog (Drosophila)                                                        | WT and L359V | 1.36 | 1.46 | 1.04 | 1.12 | 4.83E-02 | 1.32E-02 | 9.51E-01 | 1.00E+00 |
| 8143188 | NM_194071    | CREB3L2   | cAMP responsive element binding protein 3-like 2                                 | WT and L359V | 1.45 | 1.45 | 1.16 | 1.10 | 1.23E-02 | 7.86E-03 | 7.65E-01 | 1.00E+00 |
| 8151308 | ---          | ---       | ---                                                                              | WT and L359V | 1.83 | 1.45 | 1.38 | 1.31 | 2.00E-03 | 1.73E-02 | 2.40E-01 | 3.09E-01 |
| 7929132 | NM_032373    | PCGF5     | polycomb group ring finger 5                                                     | WT and L359V | 1.60 | 1.44 | 1.24 | 1.23 | 1.56E-02 | 3.60E-02 | 7.38E-01 | 7.34E-01 |
| 7974533 | NM_021255    | PELI2     | pellino homolog 2 (Drosophila)                                                   | WT and L359V | 1.39 | 1.44 | 1.18 | 1.22 | 2.29E-02 | 1.00E-02 | 7.45E-01 | 4.78E-01 |
| 8120883 | NM_015018    | DOPEY1    | dopey family member 1                                                            | WT and L359V | 1.65 | 1.44 | 1.15 | 1.25 | 9.46E-04 | 3.67E-03 | 7.28E-01 | 2.29E-01 |
| 7906757 | NM_001136219 | FCGR2A    | Fc fragment of IgG, low affinity IIa, receptor (CD32)                            | WT and L359V | 1.71 | 1.43 | 1.30 | 1.28 | 7.25E-03 | 3.35E-02 | 5.59E-01 | 5.17E-01 |
| 8134435 | NM_014916    | LMTK2     | lemur tyrosine kinase 2                                                          | WT and L359V | 1.49 | 1.43 | 1.02 | 1.15 | 1.23E-02 | 1.43E-02 | 9.85E-01 | 9.15E-01 |
| 7919580 | AK125737     | LOC440570 | LOC440570                                                                        | WT and L359V | 1.52 | 1.43 | 1.57 | 1.26 | 1.79E-02 | 2.55E-02 | 7.35E-02 | 5.42E-01 |
| 7919596 | AK125737     | LOC440570 | LOC440570                                                                        | WT and L359V | 1.52 | 1.43 | 1.57 | 1.26 | 1.79E-02 | 2.55E-02 | 7.35E-02 | 5.42E-01 |
| 7902789 | NM_012262    | HS2ST1    | heparan sulfate 2-O-sulfotransferase 1                                           | WT and L359V | 1.30 | 1.43 | 1.05 | 1.18 | 4.23E-02 | 7.30E-03 | 9.27E-01 | 6.27E-01 |
| 8154394 | NM_001039697 | SNAPC3    | small nuclear RNA activating complex, polypeptide 3, 50kDa                       | WT and L359V | 1.27 | 1.42 | 1.14 | 1.16 | 3.78E-02 | 3.68E-03 | 7.50E-01 | 5.78E-01 |
| 8030064 | NM_017457    | CYTH2     | cytohesin 2                                                                      | WT and L359V | 1.31 | 1.42 | 1.10 | 1.16 | 3.18E-02 | 6.81E-03 | 8.38E-01 | 6.93E-01 |
| 7924636 | NM_014698    | TMEM63A   | transmembrane protein 63A                                                        | WT and L359V | 1.39 | 1.42 | 1.19 | 1.17 | 6.89E-03 | 3.22E-03 | 4.51E-01 | 4.46E-01 |
| 8133662 | NM_001040457 | RHBDD2    | rhomboid domain containing 2                                                     | WT and L359V | 1.50 | 1.42 | 1.27 | 1.19 | 1.56E-02 | 2.31E-02 | 5.24E-01 | 7.95E-01 |
| 7912646 | NM_001229    | CASP9     | caspase 9, apoptosis-related cysteine peptidase                                  | WT and L359V | 1.32 | 1.41 | 1.13 | 1.15 | 3.79E-02 | 9.13E-03 | 8.20E-01 | 8.05E-01 |
| 7925342 | NM_019891    | ERO1LB    | ERO1-like beta (S. cerevisiae)                                                   | WT and L359V | 1.46 | 1.41 | 1.08 | 1.22 | 3.18E-02 | 3.64E-02 | 9.10E-01 | 7.16E-01 |
| 7953765 | NM_020734    | RIMKLB    | ribosomal modification protein rimK-like family member B                         | WT and L359V | 1.37 | 1.41 | 1.09 | 1.17 | 2.41E-02 | 1.04E-02 | 8.70E-01 | 6.77E-01 |



|         |              |           |                                                                                             |              |      |      |      |      |          |          |          |          |
|---------|--------------|-----------|---------------------------------------------------------------------------------------------|--------------|------|------|------|------|----------|----------|----------|----------|
| 7928411 | NM_015037    | KIAA0913  | KIAA0913                                                                                    | WT and L359V | 1.28 | 1.41 | 1.02 | 1.05 | 3.41E-02 | 4.33E-03 | 9.77E-01 | 1.00E+00 |
| 7991234 | NM_005928    | MFGE8     | milk fat globule-EGF factor 8 protein                                                       | WT and L359V | 1.32 | 1.41 | 1.25 | 1.24 | 3.64E-02 | 8.90E-03 | 4.13E-01 | 3.47E-01 |
| 8057056 | NM_133378    | TTN       | titin                                                                                       | WT and L359V | 1.38 | 1.41 | 1.15 | 1.18 | 3.17E-02 | 1.86E-02 | 8.13E-01 | 7.53E-01 |
| 8009382 | NM_004459    | BPTF      | bromodomain PHD finger transcription factor                                                 | WT and L359V | 1.48 | 1.40 | 1.07 | 1.13 | 1.15E-02 | 1.66E-02 | 8.98E-01 | 1.00E+00 |
| 7984112 | NM_016530    | RAB8B     | RAB8B, member RAS oncogene family                                                           | WT and L359V | 1.62 | 1.40 | 1.28 | 1.26 | 1.69E-03 | 7.53E-03 | 2.50E-01 | 2.35E-01 |
| 8129953 | NM_006734    | HIVEP2    | human immunodeficiency virus type I enhancer binding protein 2                              | WT and L359V | 0.74 | 1.40 | 0.94 | 1.03 | 1.91E-02 | 7.95E-03 | 8.98E-01 | 1.00E+00 |
| 8152703 | NM_058229    | FBXO32    | F-box protein 32                                                                            | WT and L359V | 1.46 | 1.40 | 1.17 | 1.25 | 8.36E-03 | 1.05E-02 | 7.19E-01 | 3.05E-01 |
| 8007637 | NM_001466    | FZD2      | frizzled homolog 2 (Drosophila)                                                             | WT and L359V | 1.45 | 1.40 | 1.25 | 1.21 | 4.00E-02 | 4.81E-02 | 7.19E-01 | 8.29E-01 |
| 8082827 | NM_025180    | CEP63     | centrosomal protein 63kDa                                                                   | WT and L359V | 1.42 | 1.39 | 1.11 | 1.19 | 1.38E-02 | 1.29E-02 | 8.36E-01 | 6.04E-01 |
| 8040698 | NM_017877    | C2orf18   | chromosome 2 open reading frame 18                                                          | WT and L359V | 1.24 | 1.39 | 1.18 | 1.14 | 4.73E-02 | 4.27E-03 | 5.36E-01 | 6.71E-01 |
| 8102720 | NM_020337    | ANKRD50   | ankyrin repeat domain 50                                                                    | WT and L359V | 1.48 | 1.39 | 1.01 | 1.13 | 7.02E-03 | 1.10E-02 | 9.94E-01 | 8.99E-01 |
| 7999044 | NM_004380    | CREBBP    | CREB binding protein                                                                        | WT and L359V | 1.27 | 1.39 | 1.01 | 1.04 | 4.01E-02 | 5.91E-03 | 9.83E-01 | 1.00E+00 |
| 8173732 | NM_015975    | TAF9B     | TAF9B RNA polymerase II, TATA box binding protein (TBP)-associated factor, 31kD             | WT and L359V | 1.29 | 1.39 | 1.03 | 1.16 | 2.88E-02 | 5.62E-03 | 9.43E-01 | 5.69E-01 |
| 8176263 | NM_015975    | TAF9B     | TAF9B RNA polymerase II, TATA box binding protein (TBP)-associated factor, 31kD             | WT and L359V | 1.29 | 1.39 | 1.03 | 1.16 | 2.88E-02 | 5.62E-03 | 9.43E-01 | 5.69E-01 |
| 7902592 | NM_006465    | ARID3B    | AT rich interactive domain 3B (BRIGHT-like)                                                 | WT and L359V | 1.56 | 1.39 | 1.15 | 1.18 | 6.90E-03 | 2.01E-02 | 8.09E-01 | 7.16E-01 |
| 8061986 | NM_031483    | ITCH      | itchy E3 ubiquitin protein ligase homolog (mouse)                                           | WT and L359V | 1.40 | 1.39 | 1.13 | 1.20 | 1.55E-02 | 1.19E-02 | 8.16E-01 | 5.05E-01 |
| 8006237 | BC062632     | LOC400590 | hypothetical LOC400590                                                                      | WT and L359V | 1.38 | 1.39 | 1.20 | 1.16 | 4.24E-02 | 2.67E-02 | 7.47E-01 | 8.90E-01 |
| 8031526 | NM_013301    | CCDC106   | coiled-coil domain containing 106                                                           | WT and L359V | 1.27 | 1.39 | 1.17 | 1.18 | 4.70E-02 | 7.15E-03 | 6.50E-01 | 4.97E-01 |
| 7962112 | NM_001002259 | CAPRIN2   | caprin family member 2                                                                      | WT and L359V | 1.42 | 1.39 | 0.99 | 1.15 | 4.31E-02 | 4.12E-02 | 9.93E-01 | 1.00E+00 |
| 7954419 | NM_018638    | ETNK1     | ethanolamine kinase 1                                                                       | WT and L359V | 1.51 | 1.39 | 0.82 | 1.13 | 2.03E-02 | 4.07E-02 | 7.50E-01 | 1.00E+00 |
| 8036525 | NM_001042600 | MAP4K1    | mitogen-activated protein kinase kinase kinase kinase 1                                     | WT and L359V | 1.30 | 1.39 | 1.22 | 1.17 | 3.92E-02 | 1.09E-02 | 5.08E-01 | 6.34E-01 |
| 8140170 | NM_173537    | GTF2IRD2  | GTF2I repeat domain containing 2                                                            | WT and L359V | 1.36 | 1.38 | 1.00 | 1.15 | 1.55E-02 | 7.89E-03 | 9.95E-01 | 6.67E-01 |
| 8127425 | NM_018368    | LMBRD1    | LMBR1 domain containing 1                                                                   | WT and L359V | 1.59 | 1.38 | 1.04 | 1.22 | 9.57E-03 | 3.72E-02 | 9.61E-01 | 6.53E-01 |
| 8042843 | NM_032118    | WDR54     | WD repeat domain 54                                                                         | WT and L359V | 1.28 | 1.38 | 1.12 | 1.18 | 4.00E-02 | 7.86E-03 | 8.14E-01 | 4.98E-01 |
| 8168359 | NM_001013627 | NHSL2     | NHS-like 2                                                                                  | WT and L359V | 1.82 | 1.38 | 1.19 | 1.23 | 1.59E-03 | 2.55E-02 | 7.50E-01 | 5.28E-01 |
| 8133549 | NM_001003795 | GTF2IRD2B | GTF2I repeat domain containing 2B                                                           | WT and L359V | 1.38 | 1.38 | 0.98 | 1.15 | 1.35E-02 | 9.10E-03 | 9.70E-01 | 7.03E-01 |
| 8081171 | NM_153605    | CRYBG3    | beta-gamma crystallin domain containing 3                                                   | WT and L359V | 1.45 | 1.38 | 0.97 | 1.16 | 7.40E-03 | 1.08E-02 | 9.54E-01 | 7.15E-01 |
| 8117435 | NM_007047    | BTN3A2    | butyrophilin, subfamily 3, member A2                                                        | WT and L359V | 1.56 | 1.38 | 1.10 | 1.22 | 7.47E-03 | 2.48E-02 | 8.64E-01 | 5.87E-01 |
| 8052845 | NM_022173    | TIA1      | TIA1 cytotoxic granule-associated RNA binding protein                                       | WT and L359V | 1.42 | 1.38 | 1.06 | 1.22 | 1.20E-02 | 1.29E-02 | 9.10E-01 | 4.02E-01 |
| 8069178 | NM_001033049 | ADARB1    | adenosine deaminase, RNA-specific, B1 (RED1 homolog rat)                                    | WT and L359V | 1.36 | 1.38 | 1.22 | 1.22 | 2.36E-02 | 1.37E-02 | 5.21E-01 | 4.28E-01 |
| 8158939 | NM_004188    | GF1B      | growth factor independent 1B transcription repressor                                        | WT and L359V | 1.85 | 1.37 | 1.48 | 1.33 | 2.60E-03 | 4.65E-02 | 1.45E-01 | 3.31E-01 |
| 7986250 | NM_001271    | CHD2      | chromodomain helicase DNA binding protein 2                                                 | WT and L359V | 1.49 | 1.37 | 1.14 | 1.25 | 2.39E-03 | 5.62E-03 | 7.26E-01 | 1.74E-01 |
| 8056060 | NM_013450    | BAZZ2B    | bromodomain adjacent to zinc finger domain, 2B                                              | WT and L359V | 1.63 | 1.37 | 1.17 | 1.23 | 1.85E-03 | 1.25E-02 | 7.26E-01 | 3.35E-01 |
| 8080511 | NM_000720    | CACNA1D   | calcium channel, voltage-dependent, L type, alpha 1D subunit                                | WT and L359V | 1.54 | 1.37 | 1.13 | 1.20 | 1.60E-02 | 4.95E-02 | 8.45E-01 | 7.82E-01 |
| 8110437 | NM_022762    | RMND5B    | required for meiotic nuclear division 5 homolog B (S. cerevisiae)                           | WT and L359V | 1.33 | 1.37 | 1.09 | 1.12 | 2.58E-02 | 1.28E-02 | 8.62E-01 | 9.32E-01 |
| 7954104 | NM_018179    | ATF7IP    | activating transcription factor 7 interacting protein                                       | WT and L359V | 1.27 | 1.37 | 1.08 | 1.16 | 2.91E-02 | 5.60E-03 | 8.41E-01 | 4.98E-01 |
| 8161026 | NM_032818    | C9orf100  | chromosome 9 open reading frame 100                                                         | WT and L359V | 1.33 | 1.36 | 1.14 | 1.16 | 1.82E-02 | 8.56E-03 | 7.50E-01 | 6.27E-01 |
| 7966878 | NM_007174    | CIT       | citron (rho-interacting, serine)                                                            | WT and L359V | 1.39 | 1.36 | 1.01 | 1.15 | 9.39E-03 | 8.88E-03 | 9.87E-01 | 6.86E-01 |
| 7903404 | AK289844     | RNPC3     | RNA-binding region (RNP1, RRM) containing 3                                                 | WT and L359V | 1.35 | 1.36 | 1.19 | 1.23 | 2.23E-02 | 1.41E-02 | 6.12E-01 | 3.50E-01 |
| 7917359 | NM_017953    | ZNHIT6    | zinc finger, HIT type 6                                                                     | WT and L359V | 1.58 | 1.36 | 1.34 | 1.30 | 5.06E-03 | 2.47E-02 | 2.23E-01 | 2.70E-01 |
| 8117071 | NM_016255    | FAM8A1    | family with sequence similarity 8, member A1                                                | WT and L359V | 1.29 | 1.35 | 1.14 | 1.16 | 4.68E-02 | 1.61E-02 | 8.01E-01 | 7.02E-01 |
| 7964119 | NM_005419    | STAT2     | signal transducer and activator of transcription 2, 113kDa                                  | WT and L359V | 1.44 | 1.35 | 1.07 | 1.17 | 1.54E-02 | 2.64E-02 | 9.01E-01 | 7.44E-01 |
| 8172158 | NM_003688    | CASK      | calcium                                                                                     | WT and L359V | 1.55 | 1.35 | 1.05 | 1.15 | 1.06E-02 | 4.26E-02 | 9.45E-01 | 9.45E-01 |
| 8112260 | NM_018369    | DEPDC1B   | DEP domain containing 1B                                                                    | WT and L359V | 1.35 | 1.35 | 1.18 | 1.17 | 3.00E-02 | 2.21E-02 | 7.28E-01 | 7.44E-01 |
| 8084323 | NM_004423    | DVL3      | dishevelled, dsh homolog 3 (Drosophila)                                                     | WT and L359V | 1.32 | 1.35 | 1.06 | 1.04 | 3.70E-02 | 1.88E-02 | 9.05E-01 | 1.00E+00 |
| 7956009 | NM_152637    | METTL7B   | methyltransferase like 7B                                                                   | WT and L359V | 1.97 | 1.35 | 1.54 | 1.33 | 1.25E-03 | 4.81E-02 | 7.81E-02 | 3.05E-01 |
| 8149955 | NM_018492    | PBK       | PDZ binding kinase                                                                          | WT and L359V | 1.51 | 1.35 | 1.23 | 1.23 | 1.48E-02 | 4.41E-02 | 6.65E-01 | 5.75E-01 |
| 8142036 | NM_182691    | SRPK2     | SFRS protein kinase 2                                                                       | WT and L359V | 1.49 | 1.35 | 1.27 | 1.24 | 9.36E-03 | 2.63E-02 | 4.22E-01 | 4.17E-01 |
| 7971692 | NM_012141    | INTS6     | integrator complex subunit 6                                                                | WT and L359V | 1.37 | 1.35 | 1.27 | 1.22 | 1.03E-02 | 9.15E-03 | 2.11E-01 | 3.05E-01 |
| 8107005 | NM_001750    | CAST      | calpastatin                                                                                 | WT and L359V | 1.34 | 1.35 | 1.06 | 1.16 | 1.67E-02 | 1.07E-02 | 8.86E-01 | 6.27E-01 |
| 8154178 | NM_004972    | JAK2      | Janus kinase 2 (a protein tyrosine kinase)                                                  | WT and L359V | 1.54 | 1.35 | 0.83 | 1.11 | 5.06E-03 | 2.33E-02 | 6.28E-01 | 1.00E+00 |
| 7904726 | NM_006472    | TXNIP     | thioredoxin interacting protein                                                             | WT and L359V | 1.52 | 1.35 | 1.32 | 1.42 | 1.37E-02 | 4.63E-02 | 3.90E-01 | 1.46E-01 |
| 8098576 | NM_001151    | SLC25A4   | solute carrier family 25 (mitochondrial carrier; adenine nucleotide translocator), member 4 | WT and L359V | 1.46 | 1.34 | 1.27 | 1.27 | 6.93E-03 | 1.59E-02 | 2.79E-01 | 2.43E-01 |
| 8070097 | NM_017833    | DNAJC28   | DnaJ (Hsp40) homolog, subfamily C, member 28                                                | WT and L359V | 1.46 | 1.34 | 0.98 | 1.10 | 1.15E-02 | 2.64E-02 | 9.75E-01 | 1.00E+00 |
| 8105436 | NM_005921    | MAP3K1    | mitogen-activated protein kinase kinase kinase 1                                            | WT and L359V | 1.33 | 1.34 | 1.11 | 1.15 | 2.58E-02 | 1.61E-02 | 8.36E-01 | 7.32E-01 |
| 8029773 | NM_001002915 | IGFL2     | IGF-like family member 2                                                                    | WT and L359V | 1.53 | 1.34 | 1.16 | 1.21 | 8.49E-03 | 3.55E-02 | 7.99E-01 | 6.07E-01 |
| 7978932 | NM_006939    | SOS2      | son of sevenless homolog 2 (Drosophila)                                                     | WT and L359V | 1.37 | 1.33 | 1.05 | 1.13 | 2.39E-02 | 2.71E-02 | 9.22E-01 | 9.45E-01 |
| 8067113 | NM_006526    | ZNF217    | zinc finger protein 217                                                                     | WT and L359V | 1.30 | 1.33 | 1.04 | 1.14 | 2.79E-02 | 1.49E-02 | 9.31E-01 | 7.29E-01 |
| 8098995 | NM_006454    | MXD4      | MAX dimerization protein 4                                                                  | WT and L359V | 1.42 | 1.33 | 1.05 | 1.13 | 2.20E-02 | 4.31E-02 | 9.31E-01 | 1.00E+00 |
| 8124088 | NM_022113    | KIF13A    | kinesin family member 13A                                                                   | WT and L359V | 1.85 | 1.32 | 1.14 | 1.27 | 9.37E-04 | 3.41E-02 | 8.18E-01 | 3.05E-01 |
| 7932285 | NM_024948    | C10orf97  | chromosome 10 open reading frame 97                                                         | WT and L359V | 1.36 | 1.32 | 1.05 | 1.14 | 3.16E-02 | 3.67E-02 | 9.27E-01 | 9.12E-01 |
| 8155946 | NM_033305    | VPS13A    | vacuolar protein sorting 13 homolog A (S. cerevisiae)                                       | WT and L359V | 1.45 | 1.32 | 1.11 | 1.22 | 1.83E-02 | 4.98E-02 | 8.62E-01 | 6.01E-01 |
| 7969129 | NM_001040443 | PHF11     | PHD finger protein 11                                                                       | WT and L359V | 1.37 | 1.31 | 1.07 | 1.20 | 1.23E-02 | 1.73E-02 | 8.86E-01 | 4.13E-01 |
| 8095187 | NM_025009    | CEP135    | centrosomal protein 135kDa                                                                  | WT and L359V | 1.34 | 1.31 | 1.05 | 1.17 | 3.49E-02 | 3.78E-02 | 9.35E-01 | 7.09E-01 |
| 7936419 | NM_018017    | C10orf118 | chromosome 10 open reading frame 118                                                        | WT and L359V | 1.48 | 1.31 | 1.10 | 1.18 | 8.82E-03 | 3.68E-02 | 8.55E-01 | 6.67E-01 |

|         |              |             |                                                                                            |              |      |      |      |      |          |          |          |          |
|---------|--------------|-------------|--------------------------------------------------------------------------------------------|--------------|------|------|------|------|----------|----------|----------|----------|
| 7952069 | BC022856     | C11orf60    | chromosome 11 open reading frame 60                                                        | WT and L359V | 1.36 | 1.31 | 1.00 | 1.17 | 3.77E-02 | 4.82E-02 | 9.99E-01 | 8.00E-01 |
| 8048523 | NM_006736    | DNAJB2      | DnaJ (Hsp40) homolog, subfamily B, member 2                                                | WT and L359V | 1.31 | 1.31 | 1.05 | 1.13 | 3.10E-02 | 2.23E-02 | 9.12E-01 | 8.76E-01 |
| 7965094 | NM_203394    | E2F7        | E2F transcription factor 7                                                                 | WT and L359V | 1.31 | 1.30 | 0.97 | 1.03 | 4.79E-02 | 4.07E-02 | 9.52E-01 | 1.00E+00 |
| 8084173 | NM_014616    | ATP11B      | ATPase, class VI, type 11B                                                                 | WT and L359V | 1.84 | 1.30 | 1.22 | 1.28 | 1.75E-04 | 1.33E-02 | 3.10E-01 | 1.19E-01 |
| 8058159 | ---          | ---         | ---                                                                                        | WT and L359V | 1.34 | 1.29 | 1.19 | 1.18 | 2.71E-02 | 3.38E-02 | 6.39E-01 | 5.96E-01 |
| 8042195 | NM_152392    | AHSA2       | AHA1, activator of heat shock 90kDa protein ATPase homolog 2 (yeast)                       | WT and L359V | 1.33 | 1.29 | 1.05 | 1.16 | 3.45E-02 | 4.41E-02 | 9.33E-01 | 7.48E-01 |
| 8047577 | NM_024744    | ALS2CR8     | amyotrophic lateral sclerosis 2 (juvenile) chromosome region, candidate 8                  | WT and L359V | 1.47 | 1.28 | 1.04 | 1.19 | 8.51E-03 | 4.75E-02 | 9.47E-01 | 5.66E-01 |
| 7912257 | NM_001009566 | CLSTN1      | calsyntenin 1                                                                              | WT and L359V | 1.33 | 1.28 | 1.05 | 1.11 | 1.59E-02 | 2.29E-02 | 9.01E-01 | 9.32E-01 |
| 7999642 | NM_014647    | KIAA0430    | KIAA0430                                                                                   | WT and L359V | 1.26 | 1.28 | 1.05 | 1.10 | 4.79E-02 | 2.91E-02 | 9.20E-01 | 1.00E+00 |
| 7969204 | NM_052950    | WDFY2       | WD repeat and FYVE domain containing 2                                                     | WT and L359V | 1.41 | 1.28 | 1.28 | 1.21 | 9.42E-03 | 3.36E-02 | 2.27E-01 | 3.70E-01 |
| 8089000 | NM_001008390 | CGGBP1      | CGG triplet repeat binding protein 1                                                       | WT and L359V | 1.32 | 1.26 | 1.21 | 1.20 | 2.41E-02 | 3.59E-02 | 4.70E-01 | 4.24E-01 |
| 7969017 | NM_000321    | RB1         | retinoblastoma 1                                                                           | WT and L359V | 1.33 | 1.26 | 1.10 | 1.15 | 1.92E-02 | 3.60E-02 | 8.38E-01 | 6.43E-01 |
| 8011499 | NM_002558    | P2RX1       | purinergic receptor P2X, ligand-gated ion channel, 1                                       | WT and L359V | 1.31 | 1.26 | 1.25 | 1.16 | 2.67E-02 | 4.19E-02 | 3.06E-01 | 6.56E-01 |
| 8004699 | NM_001005273 | CHD3        | chromodomain helicase DNA binding protein 3                                                | WT and L359V | 1.47 | 1.26 | 1.19 | 1.14 | 4.75E-03 | 4.13E-02 | 5.66E-01 | 7.99E-01 |
| 7907861 | NM_004736    | XPR1        | xenotropic and polytropic retrovirus receptor                                              | WT and L359V | 1.25 | 1.25 | 1.04 | 1.09 | 4.35E-02 | 3.05E-02 | 9.27E-01 | 1.00E+00 |
| 7916185 | NM_001009881 | ZCCHC11     | zinc finger, CCHC domain containing 11                                                     | WT and L359V | 1.26 | 1.25 | 1.10 | 1.12 | 4.02E-02 | 3.48E-02 | 8.25E-01 | 8.60E-01 |
| 8080878 | NM_001128149 | ATXN7       | ataxin 7                                                                                   | WT and L359V | 1.28 | 1.24 | 1.13 | 1.10 | 2.54E-02 | 3.14E-02 | 7.36E-01 | 9.88E-01 |
| 8092095 | NM_015028    | TNIK        | TRAF2 and NCK interacting kinase                                                           | WT and L359V | 1.50 | 1.23 | 1.30 | 1.15 | 2.38E-03 | 4.33E-02 | 1.20E-01 | 6.16E-01 |
| 8083221 | NM_002586    | PBX2        | pre-B-cell leukemia homeobox 2                                                             | WT and L359V | 1.26 | 1.23 | 1.04 | 1.06 | 4.06E-02 | 4.62E-02 | 9.22E-01 | 1.00E+00 |
| 7907445 | NM_014458    | KLHL20      | kelch-like 20 (Drosophila)                                                                 | WT and L359V | 1.30 | 1.23 | 1.01 | 1.11 | 2.22E-02 | 4.84E-02 | 9.93E-01 | 9.13E-01 |
| 8102410 | NR_002225    | RPS26L      | 40S ribosomal protein S26-like                                                             | WT and L359V | 0.80 | 0.82 | 0.93 | 0.87 | 4.44E-02 | 4.65E-02 | 8.58E-01 | 5.93E-01 |
| 7967987 | NM_024026    | MRP63       | mitochondrial ribosomal protein 63                                                         | WT and L359V | 0.79 | 0.81 | 0.91 | 0.90 | 3.79E-02 | 4.26E-02 | 8.36E-01 | 8.78E-01 |
| 7947450 | NM_005574    | LMO2        | LIM domain only 2 (rhombotin-like 1)                                                       | WT and L359V | 0.72 | 0.81 | 0.92 | 0.89 | 8.29E-03 | 4.26E-02 | 8.38E-01 | 8.67E-01 |
| 8018937 | NM_025090    | USP36       | ubiquitin specific peptidase 36                                                            | WT and L359V | 0.75 | 0.81 | 0.93 | 0.87 | 1.45E-02 | 4.48E-02 | 8.76E-01 | 6.07E-01 |
| 8092457 | NM_005787    | ALG3        | asparagine-linked glycosylation 3, alpha-1,3- mannosyltransferase homolog (S. cerevisiae)  | WT and L359V | 0.76 | 0.81 | 0.94 | 0.85 | 1.90E-02 | 3.98E-02 | 8.86E-01 | 4.42E-01 |
| 8072883 | NM_024313    | NOL12       | nucleolar protein 12                                                                       | WT and L359V | 0.78 | 0.81 | 0.87 | 0.86 | 2.04E-02 | 2.92E-02 | 6.50E-01 | 4.46E-01 |
| 7921014 | NM_005920    | MEF2D       | myocyte enhancer factor 2D                                                                 | WT and L359V | 0.77 | 0.81 | 0.95 | 0.87 | 2.74E-02 | 4.76E-02 | 9.13E-01 | 6.34E-01 |
| 8007008 | NM_003250    | THRA        | thyroid hormone receptor, alpha (erythroblastic leukemia viral (v-erb-a) oncogene homolog) | WT and L359V | 0.76 | 0.80 | 0.86 | 0.86 | 1.89E-02 | 3.46E-02 | 6.50E-01 | 5.28E-01 |
| 8089830 | NM_001099678 | LRRC58      | leucine rich repeat containing 58                                                          | WT and L359V | 0.81 | 0.80 | 0.90 | 0.90 | 5.00E-02 | 2.91E-02 | 8.09E-01 | 8.84E-01 |
| 7942439 | NM_032871    | RELT        | RELT tumor necrosis factor receptor                                                        | WT and L359V | 0.76 | 0.80 | 0.86 | 0.85 | 1.70E-02 | 3.14E-02 | 6.11E-01 | 4.62E-01 |
| 8093976 | NM_020773    | TBC1D14     | TBC1 domain family, member 14                                                              | WT and L359V | 0.71 | 0.80 | 0.84 | 0.87 | 7.03E-03 | 3.41E-02 | 4.70E-01 | 6.73E-01 |
| 7967202 | NM_019034    | RHOF        | ras homolog gene family, member F (in filopodia)                                           | WT and L359V | 0.77 | 0.80 | 0.87 | 0.85 | 3.58E-02 | 4.88E-02 | 7.38E-01 | 5.83E-01 |
| 7900510 | NM_001905    | CTPS        | CTP synthase                                                                               | WT and L359V | 0.72 | 0.80 | 0.87 | 0.85 | 1.09E-02 | 4.33E-02 | 7.52E-01 | 5.52E-01 |
| 8003410 | NM_000512    | GALNS       | galactosamine (N-acetyl)-6-sulfate sulfatase                                               | WT and L359V | 0.76 | 0.80 | 0.87 | 0.85 | 1.90E-02 | 3.28E-02 | 7.14E-01 | 4.58E-01 |
| 8073135 | NM_019008    | SMCR7L      | Smith-Magenis syndrome chromosome region, candidate 7-like                                 | WT and L359V | 0.80 | 0.80 | 0.88 | 0.88 | 3.73E-02 | 2.70E-02 | 7.34E-01 | 7.02E-01 |
| 7966213 | NM_052845    | MMAB        | methylmalonic aciduria (cobalamin deficiency) cblB type                                    | WT and L359V | 0.77 | 0.79 | 0.90 | 0.86 | 3.41E-02 | 4.19E-02 | 8.34E-01 | 6.66E-01 |
| 8042942 | NM_000189    | HK2         | hexokinase 2                                                                               | WT and L359V | 0.73 | 0.79 | 0.81 | 0.82 | 1.38E-02 | 4.08E-02 | 4.12E-01 | 3.47E-01 |
| 8010271 | NM_024419    | PGS1        | phosphatidylglycerophosphate synthase 1                                                    | WT and L359V | 0.77 | 0.79 | 0.81 | 0.84 | 2.27E-02 | 2.85E-02 | 3.16E-01 | 3.70E-01 |
| 8063739 | NM_080672    | PHACTR3     | phosphatase and actin regulator 3                                                          | WT and L359V | 0.75 | 0.79 | 0.88 | 0.90 | 2.24E-02 | 3.72E-02 | 7.65E-01 | 9.89E-01 |
| 7934789 | NM_017551    | GRID1       | glutamate receptor, ionotropic, delta 1                                                    | WT and L359V | 0.66 | 0.79 | 0.78 | 0.82 | 4.16E-03 | 4.44E-02 | 2.80E-01 | 4.11E-01 |
| 8105481 | NM_152687    | GAPT        | GRB2-binding adaptor protein, transmembrane                                                | WT and L359V | 1.29 | 0.79 | 1.06 | 1.03 | 2.36E-02 | 2.50E-02 | 8.90E-01 | 1.00E+00 |
| 7945579 | NM_023947    | CHID1       | chitinase domain containing 1                                                              | WT and L359V | 0.77 | 0.79 | 0.92 | 0.86 | 2.11E-02 | 2.08E-02 | 8.41E-01 | 4.98E-01 |
| 8162729 | NM_014788    | TRIM14      | tripartite motif-containing 14                                                             | WT and L359V | 0.73 | 0.79 | 0.89 | 0.83 | 1.47E-02 | 3.78E-02 | 8.19E-01 | 4.26E-01 |
| 8039413 | NM_014931    | SAPS1       | SAPS domain family, member 1                                                               | WT and L359V | 0.76 | 0.78 | 0.88 | 0.84 | 2.39E-02 | 2.87E-02 | 7.50E-01 | 4.02E-01 |
| 7921110 | NM_030980    | ISG20L2     | interferon stimulated exonuclease gene 20kDa-like 2                                        | WT and L359V | 0.76 | 0.78 | 0.88 | 0.83 | 1.61E-02 | 1.99E-02 | 7.20E-01 | 3.05E-01 |
| 7927425 | NM_020945    | WDFY4       | WDFY family member 4                                                                       | WT and L359V | 0.65 | 0.78 | 0.74 | 0.78 | 2.23E-03 | 2.87E-02 | 9.26E-02 | 1.69E-01 |
| 8159692 | NM_152285    | ARRDC1      | arrestin domain containing 1                                                               | WT and L359V | 0.79 | 0.78 | 0.89 | 0.86 | 2.74E-02 | 1.56E-02 | 7.82E-01 | 5.10E-01 |
| 7911359 | NM_015658    | NOC2L       | nucleolar complex associated 2 homolog (S. cerevisiae)                                     | WT and L359V | 0.70 | 0.78 | 0.87 | 0.83 | 1.00E-02 | 3.84E-02 | 7.74E-01 | 4.61E-01 |
| 7974471 | ---          | ---         | ---                                                                                        | WT and L359V | 1.29 | 0.78 | 1.05 | 1.05 | 3.07E-02 | 2.45E-02 | 9.09E-01 | 1.00E+00 |
| 8140020 | NM_018044    | NSUN5       | NOL1                                                                                       | WT and L359V | 0.76 | 0.78 | 0.84 | 0.88 | 3.82E-02 | 4.15E-02 | 6.30E-01 | 9.13E-01 |
| 7999102 | NM_003223    | TFAP4       | transcription factor AP-4 (activating enhancer binding protein 4)                          | WT and L359V | 0.76 | 0.78 | 0.94 | 0.87 | 3.73E-02 | 4.23E-02 | 9.09E-01 | 8.05E-01 |
| 8024584 | NM_020170    | NCLN        | nicalin homolog (zebrafish)                                                                | WT and L359V | 0.73 | 0.78 | 0.93 | 0.86 | 1.93E-02 | 3.93E-02 | 8.79E-01 | 6.91E-01 |
| 7956114 | NM_001029    | RPS26       | ribosomal protein S26                                                                      | WT and L359V | 0.77 | 0.77 | 0.91 | 0.84 | 1.90E-02 | 1.61E-02 | 8.23E-01 | 3.69E-01 |
| 8087739 | NM_013324    | CISH        | cytokine inducible SH2-containing protein                                                  | WT and L359V | 0.76 | 0.77 | 0.95 | 0.87 | 2.88E-02 | 2.75E-02 | 9.22E-01 | 7.29E-01 |
| 8021884 | NM_004715    | CTDP1       | CTD (carboxy-terminal domain, RNA polymerase II, polypeptide A) phosphatase, subunit 1     | WT and L359V | 0.80 | 0.77 | 0.93 | 0.88 | 4.46E-02 | 1.64E-02 | 8.64E-01 | 7.01E-01 |
| 8063078 | NM_001127695 | CTSA        | cathepsin A                                                                                | WT and L359V | 0.76 | 0.77 | 0.90 | 0.86 | 2.88E-02 | 2.64E-02 | 8.23E-01 | 6.27E-01 |
| 7981157 | BC008299     | C14orf139   | chromosome 14 open reading frame 139                                                       | WT and L359V | 0.69 | 0.77 | 0.84 | 0.83 | 7.35E-03 | 2.86E-02 | 6.11E-01 | 4.58E-01 |
| 8049799 | NM_001001891 | ANO7        | anoctamin 7                                                                                | WT and L359V | 0.75 | 0.77 | 0.87 | 0.87 | 3.49E-02 | 4.08E-02 | 7.85E-01 | 8.59E-01 |
| 7997852 | NM_016209    | TRAPPC2L    | trafficking protein particle complex 2-like                                                | WT and L359V | 0.76 | 0.77 | 0.92 | 0.84 | 1.53E-02 | 1.44E-02 | 8.47E-01 | 3.55E-01 |
| 8005089 | NM_001303    | COX10       | COX10 homolog, cytochrome c oxidase assembly protein, heme A: farnesyltransferase domain   | WT and L359V | 0.78 | 0.77 | 0.84 | 0.86 | 3.29E-02 | 1.76E-02 | 5.03E-01 | 5.23E-01 |
| 8025563 | NM_001040664 | PPAN-P2RY11 | PPAN-P2RY11 readthrough transcript                                                         | WT and L359V | 0.72 | 0.77 | 0.91 | 0.86 | 8.36E-03 | 1.66E-02 | 8.36E-01 | 5.65E-01 |
| 8024078 | NM_005224    | ARID3A      | AT rich interactive domain 3A (BRIGHT-like)                                                | WT and L359V | 0.79 | 0.77 | 0.91 | 0.85 | 2.80E-02 | 1.19E-02 | 8.25E-01 | 3.70E-01 |
| 8073612 | NM_000714    | TSPO        | translocator protein (18kDa)                                                               | WT and L359V | 0.71 | 0.77 | 0.90 | 0.84 | 1.73E-02 | 3.79E-02 | 8.37E-01 | 6.07E-01 |
| 7905881 | NM_207196    | ADAM15      | ADAM metallopeptidase domain 15                                                            | WT and L359V | 0.76 | 0.77 | 0.95 | 0.87 | 3.77E-02 | 2.82E-02 | 9.15E-01 | 7.93E-01 |
| 7967127 | NM_006549    | CAMKK2      | calcium                                                                                    | WT and L359V | 0.75 | 0.77 | 0.90 | 0.87 | 1.48E-02 | 1.42E-02 | 8.14E-01 | 6.34E-01 |

|         |              |          |                                                                                  |              |      |      |      |      |          |          |          |          |
|---------|--------------|----------|----------------------------------------------------------------------------------|--------------|------|------|------|------|----------|----------|----------|----------|
| 8134965 | NM_020246    | SLC12A9  | solute carrier family 12 (potassium                                              | WT and L359V | 0.63 | 0.76 | 0.79 | 0.80 | 1.59E-03 | 1.80E-02 | 2.36E-01 | 2.12E-01 |
| 8065868 | NM_002212    | EIF6     | eukaryotic translation initiation factor 6                                       | WT and L359V | 0.75 | 0.76 | 0.94 | 0.83 | 2.41E-02 | 2.42E-02 | 8.98E-01 | 4.56E-01 |
| 7897482 | NM_005026    | PIK3CD   | phosphoinositide-3-kinase, catalytic, delta polypeptide                          | WT and L359V | 0.67 | 0.76 | 0.81 | 0.81 | 6.14E-03 | 2.83E-02 | 4.42E-01 | 3.56E-01 |
| 8044793 | NM_182915    | STEAP3   | STEAP family member 3                                                            | WT and L359V | 0.70 | 0.76 | 0.88 | 0.82 | 5.75E-03 | 1.52E-02 | 7.38E-01 | 3.05E-01 |
| 8033789 | NM_001008727 | ZNF121   | zinc finger protein 121                                                          | WT and L359V | 0.72 | 0.76 | 0.87 | 0.88 | 2.28E-02 | 4.11E-02 | 8.05E-01 | 9.45E-01 |
| 8043197 | NM_003761    | VAMP8    | vesicle-associated membrane protein 8 (endobrevin)                               | WT and L359V | 0.77 | 0.76 | 0.92 | 0.86 | 4.24E-02 | 2.49E-02 | 8.58E-01 | 6.34E-01 |
| 8152750 | NM_194291    | TMEM65   | transmembrane protein 65                                                         | WT and L359V | 0.56 | 0.76 | 0.93 | 0.83 | 5.27E-04 | 2.15E-02 | 8.76E-01 | 4.39E-01 |
| 8025586 | NM_146388    | MRPL4    | mitochondrial ribosomal protein L4                                               | WT and L359V | 0.75 | 0.76 | 0.95 | 0.87 | 1.45E-02 | 1.35E-02 | 9.02E-01 | 5.96E-01 |
| 7977820 | NM_001039619 | PRMT5    | protein arginine methyltransferase 5                                             | WT and L359V | 0.74 | 0.76 | 0.90 | 0.86 | 1.38E-02 | 1.74E-02 | 8.20E-01 | 6.19E-01 |
| 7950906 | NM_001814    | CTSC     | cathepsin C                                                                      | WT and L359V | 0.75 | 0.76 | 0.93 | 0.90 | 1.48E-02 | 1.45E-02 | 8.59E-01 | 9.45E-01 |
| 8037495 | NM_145288    | ZNF296   | zinc finger protein 296                                                          | WT and L359V | 0.67 | 0.76 | 0.87 | 0.82 | 9.53E-03 | 4.31E-02 | 8.07E-01 | 4.97E-01 |
| 7958379 | NM_007062    | PWP1     | PWP1 homolog (S. cerevisiae)                                                     | WT and L359V | 0.77 | 0.76 | 0.84 | 0.87 | 2.91E-02 | 1.60E-02 | 5.15E-01 | 6.87E-01 |
| 8063893 | NM_007002    | ADRM1    | adhesion regulating molecule 1                                                   | WT and L359V | 0.75 | 0.76 | 0.85 | 0.83 | 3.01E-02 | 2.69E-02 | 6.79E-01 | 4.56E-01 |
| 8138091 | NM_139179    | DAGLB    | diacylglycerol lipase, beta                                                      | WT and L359V | 0.75 | 0.76 | 0.91 | 0.88 | 2.42E-02 | 2.03E-02 | 8.37E-01 | 8.38E-01 |
| 8070799 | NM_182668    | UBE2G2   | ubiquitin-conjugating enzyme E2G 2 (UBC7 homolog, yeast)                         | WT and L359V | 0.72 | 0.76 | 0.88 | 0.87 | 7.26E-03 | 1.17E-02 | 7.40E-01 | 5.79E-01 |
| 8077370 | NM_006515    | SETMAR   | SET domain and mariner transposase fusion gene                                   | WT and L359V | 0.70 | 0.76 | 0.80 | 0.83 | 1.43E-02 | 3.37E-02 | 4.37E-01 | 5.23E-01 |
| 8087576 | NM_006764    | IFRD2    | interferon-related developmental regulator 2                                     | WT and L359V | 0.77 | 0.76 | 0.93 | 0.87 | 4.52E-02 | 2.88E-02 | 8.80E-01 | 8.38E-01 |
| 8034615 | NM_001136035 | TRMT1    | TRM1 tRNA methyltransferase 1 homolog (S. cerevisiae)                            | WT and L359V | 0.75 | 0.76 | 0.88 | 0.87 | 4.83E-02 | 3.93E-02 | 8.15E-01 | 9.05E-01 |
| 8160036 | AK292632     | C9orf123 | chromosome 9 open reading frame 123                                              | WT and L359V | 0.72 | 0.76 | 0.87 | 0.87 | 1.23E-02 | 1.94E-02 | 7.69E-01 | 7.09E-01 |
| 8040843 | NM_004341    | CAD      | carbamoyl-phosphate synthetase 2, aspartate transcarbamylase, and dihydroorotase | WT and L359V | 0.76 | 0.76 | 0.90 | 0.82 | 2.56E-02 | 1.63E-02 | 8.23E-01 | 3.40E-01 |
| 8163569 | NM_030767    | AKNA     | AT-hook transcription factor                                                     | WT and L359V | 0.70 | 0.76 | 0.86 | 0.82 | 2.07E-02 | 4.82E-02 | 8.01E-01 | 5.93E-01 |
| 8020254 | NM_031216    | SEH1L    | SEH1-like (S. cerevisiae)                                                        | WT and L359V | 0.76 | 0.76 | 0.87 | 0.86 | 1.59E-02 | 1.10E-02 | 6.65E-01 | 4.98E-01 |
| 7927071 | NM_001007094 | ZNF37A   | zinc finger protein 37A                                                          | WT and L359V | 0.78 | 0.76 | 0.88 | 0.89 | 3.59E-02 | 1.44E-02 | 7.71E-01 | 8.85E-01 |
| 8119842 | NM_203290    | POLR1C   | polymerase (RNA) I polypeptide C, 30kDa                                          | WT and L359V | 0.73 | 0.76 | 0.89 | 0.88 | 3.18E-02 | 3.80E-02 | 8.28E-01 | 9.40E-01 |
| 8034589 | NM_004461    | FARSA    | phenylalanyl-tRNA synthetase, alpha subunit                                      | WT and L359V | 0.77 | 0.76 | 0.95 | 0.89 | 4.00E-02 | 1.94E-02 | 9.15E-01 | 8.97E-01 |
| 8002121 | NM_001907    | CTRL     | chymotrypsin-like                                                                | WT and L359V | 0.71 | 0.75 | 0.83 | 0.82 | 2.36E-02 | 3.84E-02 | 6.75E-01 | 5.65E-01 |
| 7966600 | NM_024959    | SLC24A6  | solute carrier family 24 (sodium                                                 | WT and L359V | 0.68 | 0.75 | 0.86 | 0.83 | 4.77E-03 | 1.45E-02 | 7.20E-01 | 3.56E-01 |
| 7997179 | NM_001361    | DHODH    | dihydroorotate dehydrogenase                                                     | WT and L359V | 0.74 | 0.75 | 0.85 | 0.87 | 4.59E-02 | 4.48E-02 | 7.91E-01 | 9.27E-01 |
| 8076344 | NM_001018050 | POLR3H   | polymerase (RNA) III (DNA directed) polypeptide H (22.9kD)                       | WT and L359V | 0.75 | 0.75 | 0.89 | 0.85 | 1.61E-02 | 1.31E-02 | 8.06E-01 | 5.05E-01 |
| 8075924 | NM_002405    | MFNG     | MFNG O-fucosylpeptide 3-beta-N-acetylglucosaminyltransferase                     | WT and L359V | 0.71 | 0.75 | 0.99 | 0.87 | 3.16E-02 | 4.93E-02 | 9.88E-01 | 9.81E-01 |
| 7912374 | NM_003132    | SRM      | spermidine synthase                                                              | WT and L359V | 0.71 | 0.75 | 0.94 | 0.82 | 5.06E-03 | 8.88E-03 | 8.80E-01 | 2.74E-01 |
| 8159249 | NM_016034    | MRPS2    | mitochondrial ribosomal protein S2                                               | WT and L359V | 0.76 | 0.75 | 0.90 | 0.89 | 4.74E-02 | 2.69E-02 | 8.38E-01 | 9.94E-01 |
| 8126588 | NM_020750    | XPO5     | exportin 5                                                                       | WT and L359V | 0.78 | 0.75 | 0.90 | 0.89 | 3.32E-02 | 1.10E-02 | 8.23E-01 | 7.89E-01 |
| 7956152 | NM_006191    | PA2G4    | proliferation-associated 2G4, 38kDa                                              | WT and L359V | 0.78 | 0.75 | 0.88 | 0.86 | 3.21E-02 | 1.16E-02 | 7.65E-01 | 5.78E-01 |
| 7950119 | BC001706     | C11orf59 | chromosome 11 open reading frame 59                                              | WT and L359V | 0.75 | 0.75 | 0.86 | 0.83 | 2.91E-02 | 2.25E-02 | 7.62E-01 | 4.97E-01 |
| 7964548 | NM_005371    | METTL1   | methyltransferase like 1                                                         | WT and L359V | 0.75 | 0.75 | 0.86 | 0.86 | 1.71E-02 | 1.23E-02 | 6.39E-01 | 6.04E-01 |
| 8131111 | NM_001037283 | EIF3B    | eukaryotic translation initiation factor 3, subunit B                            | WT and L359V | 0.78 | 0.75 | 0.90 | 0.87 | 3.70E-02 | 1.29E-02 | 8.25E-01 | 6.53E-01 |
| 8173269 | NM_031206    | LAS1L    | LAS1-like (S. cerevisiae)                                                        | WT and L359V | 0.79 | 0.75 | 0.92 | 0.92 | 4.74E-02 | 1.23E-02 | 8.41E-01 | 1.00E+00 |
| 8008664 | NM_003488    | AKAP1    | A kinase (PRKA) anchor protein 1                                                 | WT and L359V | 0.77 | 0.75 | 0.91 | 0.85 | 2.30E-02 | 8.80E-03 | 8.16E-01 | 4.67E-01 |
| 7962516 | NM_030674    | SLC38A1  | solute carrier family 38, member 1                                               | WT and L359V | 0.74 | 0.74 | 0.90 | 0.91 | 3.33E-02 | 2.69E-02 | 8.48E-01 | 1.00E+00 |
| 7950294 | NM_016565    | CHCHD8   | coiled-coil-helix-coiled-coil-helix domain containing 8                          | WT and L359V | 0.74 | 0.74 | 0.86 | 0.84 | 3.49E-02 | 2.81E-02 | 7.72E-01 | 6.27E-01 |
| 8161229 | NM_012166    | FBXO10   | F-box protein 10                                                                 | WT and L359V | 0.77 | 0.74 | 0.89 | 0.86 | 3.17E-02 | 1.36E-02 | 8.14E-01 | 6.66E-01 |
| 8122773 | NM_015440    | MTHFD1L  | methylenetetrahydrofolate dehydrogenase (NADP+ dependent) 1-like                 | WT and L359V | 0.64 | 0.74 | 0.90 | 0.88 | 9.39E-03 | 4.43E-02 | 8.70E-01 | 1.00E+00 |
| 8112159 | NM_024669    | ANKRD55  | ankyrin repeat domain 55                                                         | WT and L359V | 0.61 | 0.74 | 0.87 | 0.84 | 5.48E-03 | 4.13E-02 | 8.16E-01 | 7.09E-01 |
| 8026806 | NM_024656    | GLT25D1  | glycosyltransferase 25 domain containing 1                                       | WT and L359V | 0.79 | 0.74 | 0.93 | 0.88 | 3.18E-02 | 8.43E-03 | 8.62E-01 | 7.04E-01 |
| 7941822 | NM_207354    | ANKRD13D | ankyrin repeat domain 13 family, member D                                        | WT and L359V | 0.76 | 0.74 | 0.83 | 0.81 | 3.58E-02 | 1.66E-02 | 5.45E-01 | 3.50E-01 |
| 7929990 | NM_015062    | PPRC1    | peroxisome proliferator-activated receptor gamma, coactivator-related 1          | WT and L359V | 0.78 | 0.74 | 0.92 | 0.83 | 4.23E-02 | 1.28E-02 | 8.56E-01 | 4.26E-01 |
| 8023191 | NM_005901    | SMAD2    | SMAD family member 2                                                             | WT and L359V | 0.77 | 0.74 | 0.73 | 0.80 | 4.96E-02 | 2.04E-02 | 1.24E-01 | 3.31E-01 |
| 8165552 | NM_001130969 | NELF     | nasal embryonic LHRH factor                                                      | WT and L359V | 0.72 | 0.74 | 0.81 | 0.80 | 1.90E-02 | 2.17E-02 | 5.05E-01 | 3.45E-01 |
| 7970473 | NM_022459    | XPO4     | exportin 4                                                                       | WT and L359V | 0.78 | 0.74 | 0.88 | 0.87 | 3.15E-02 | 7.89E-03 | 7.69E-01 | 6.60E-01 |
| 8141688 | NM_001084    | PLOD3    | procollagen-lysine, 2-oxoglutarate 5-dioxygenase 3                               | WT and L359V | 0.78 | 0.74 | 1.01 | 0.85 | 4.17E-02 | 1.10E-02 | 9.94E-01 | 5.00E-01 |
| 8027100 | NM_019070    | DDX49    | DEAD (Asp-Glu-Ala-Asp) box polypeptide 49                                        | WT and L359V | 0.72 | 0.74 | 0.86 | 0.83 | 1.51E-02 | 1.51E-02 | 7.26E-01 | 4.62E-01 |
| 7915472 | NM_006516    | SLC2A1   | solute carrier family 2 (facilitated glucose transporter), member 1              | WT and L359V | 0.67 | 0.74 | 0.86 | 0.83 | 6.78E-03 | 1.97E-02 | 7.50E-01 | 5.23E-01 |
| 8076374 | NM_005008    | NHP2L1   | NHP2 non-histone chromosome protein 2-like 1 (S. cerevisiae)                     | WT and L359V | 0.72 | 0.74 | 0.88 | 0.86 | 1.93E-02 | 1.87E-02 | 8.13E-01 | 7.09E-01 |
| 7910416 | NM_014777    | URB2     | URB2 ribosome biogenesis 2 homolog (S. cerevisiae)                               | WT and L359V | 0.69 | 0.74 | 0.84 | 0.78 | 4.95E-03 | 9.20E-03 | 4.99E-01 | 1.62E-01 |
| 8060854 | NM_182734    | PLCB1    | phospholipase C, beta 1 (phosphoinositide-specific)                              | WT and L359V | 0.63 | 0.74 | 0.67 | 0.79 | 9.52E-03 | 4.65E-02 | 1.15E-01 | 4.71E-01 |
| 8076569 | NM_015140    | TTL12    | tubulin tyrosine ligase-like family, member 12                                   | WT and L359V | 0.72 | 0.74 | 0.91 | 0.84 | 2.78E-02 | 3.05E-02 | 8.67E-01 | 6.95E-01 |
| 8008185 | NM_016428    | ABI3     | ABI family, member 3                                                             | WT and L359V | 0.65 | 0.74 | 0.70 | 0.74 | 3.19E-03 | 1.35E-02 | 6.04E-02 | 9.67E-02 |
| 8000884 | NM_024096    | DCTPP1   | dCTP pyrophosphatase 1                                                           | WT and L359V | 0.76 | 0.74 | 0.88 | 0.81 | 2.84E-02 | 1.25E-02 | 7.92E-01 | 3.25E-01 |
| 7903719 | NM_004037    | AMPD2    | adenosine monophosphate deaminase 2 (isoform L)                                  | WT and L359V | 0.69 | 0.74 | 0.84 | 0.83 | 9.40E-03 | 1.68E-02 | 6.65E-01 | 4.61E-01 |
| 8011850 | NM_001212    | C1QB2    | complement component 1, q subcomponent binding protein                           | WT and L359V | 0.77 | 0.73 | 0.92 | 0.88 | 2.68E-02 | 9.58E-03 | 8.52E-01 | 8.13E-01 |
| 8131000 | NM_017802    | HEATR2   | HEAT repeat containing 2                                                         | WT and L359V | 0.70 | 0.73 | 0.90 | 0.82 | 6.93E-03 | 1.02E-02 | 8.20E-01 | 3.50E-01 |
| 8004510 | NM_001251    | CD68     | CD68 molecule                                                                    | WT and L359V | 0.70 | 0.73 | 0.90 | 0.81 | 1.23E-02 | 1.72E-02 | 8.38E-01 | 4.02E-01 |
| 8149365 | NR_003494    | FAM86B1  | family with sequence similarity 86, member B1                                    | WT and L359V | 0.79 | 0.73 | 0.93 | 0.86 | 4.65E-02 | 8.80E-03 | 8.64E-01 | 6.27E-01 |
| 8149389 | NR_024241    | FAM86D   | family with sequence similarity 86, member D                                     | WT and L359V | 0.76 | 0.73 | 0.89 | 0.86 | 2.79E-02 | 1.14E-02 | 8.16E-01 | 6.55E-01 |

|         |              |           |                                                                              |              |      |      |      |      |          |          |          |          |
|---------|--------------|-----------|------------------------------------------------------------------------------|--------------|------|------|------|------|----------|----------|----------|----------|
| 7963774 | NM_015481    | ZNF385A   | zinc finger protein 385A                                                     | WT and L359V | 0.63 | 0.73 | 0.81 | 0.75 | 4.98E-03 | 2.25E-02 | 5.47E-01 | 1.74E-01 |
| 7915084 | NM_024640    | YRDC      | yrdC domain containing (E. coli)                                             | WT and L359V | 0.76 | 0.73 | 0.89 | 0.85 | 4.63E-02 | 1.75E-02 | 8.34E-01 | 6.96E-01 |
| 7899273 | NM_006600    | NUDC      | nuclear distribution gene C homolog (A. nidulans)                            | WT and L359V | 0.72 | 0.73 | 0.83 | 0.83 | 1.48E-02 | 1.30E-02 | 5.45E-01 | 4.73E-01 |
| 8119492 | NM_004053    | BYSL      | bystin-like                                                                  | WT and L359V | 0.71 | 0.73 | 0.85 | 0.83 | 1.54E-02 | 1.55E-02 | 7.12E-01 | 4.78E-01 |
| 8008517 | NM_198175    | NME1      | non-metastatic cells 1, protein (NM23A) expressed in                         | WT and L359V | 0.76 | 0.73 | 0.96 | 0.87 | 3.29E-02 | 1.10E-02 | 9.29E-01 | 7.47E-01 |
| 8053496 | NM_015425    | POLR1A    | polymerase (RNA) I polypeptide A, 194kDa                                     | WT and L359V | 0.72 | 0.73 | 0.83 | 0.82 | 2.21E-02 | 2.03E-02 | 6.69E-01 | 4.98E-01 |
| 8011861 | NM_020162    | DHX33     | DEAH (Asp-Glu-Ala-His) box polypeptide 33                                    | WT and L359V | 0.71 | 0.73 | 0.90 | 0.85 | 6.90E-03 | 7.22E-03 | 8.23E-01 | 5.09E-01 |
| 8020495 | NM_138375    | CABLES1   | Cdk5 and Abl enzyme substrate 1                                              | WT and L359V | 0.62 | 0.73 | 0.76 | 0.78 | 6.65E-03 | 3.04E-02 | 3.90E-01 | 3.86E-01 |
| 8164269 | NM_000118    | ENG       | endoglin                                                                     | WT and L359V | 0.60 | 0.73 | 0.75 | 0.73 | 1.09E-03 | 9.01E-03 | 1.20E-01 | 7.68E-02 |
| 8126288 | NM_024807    | TREML2    | triggering receptor expressed on myeloid cells-like 2                        | WT and L359V | 0.71 | 0.73 | 0.78 | 0.78 | 1.92E-02 | 1.89E-02 | 3.63E-01 | 3.05E-01 |
| 8165011 | NM_002003    | FCN1      | ficolin (collagen)                                                           | WT and L359V | 0.68 | 0.73 | 0.78 | 0.79 | 1.38E-02 | 2.55E-02 | 4.37E-01 | 3.70E-01 |
| 7922717 | NM_002928    | RGS16     | regulator of G-protein signaling 16                                          | WT and L359V | 0.78 | 0.73 | 0.97 | 0.92 | 2.85E-02 | 6.70E-03 | 9.44E-01 | 1.00E+00 |
| 8073743 | NM_006953    | UPK3A     | uroplakin 3A                                                                 | WT and L359V | 0.73 | 0.73 | 0.83 | 0.84 | 2.70E-02 | 1.61E-02 | 6.29E-01 | 6.00E-01 |
| 8113790 | NM_178450    | MARCH3    | membrane-associated ring finger (C3HC4) 3                                    | WT and L359V | 0.73 | 0.72 | 0.96 | 0.88 | 1.46E-02 | 9.06E-03 | 9.29E-01 | 7.90E-01 |
| 8157761 | NM_014397    | NEK6      | NIMA (never in mitosis gene a)-related kinase 6                              | WT and L359V | 0.72 | 0.72 | 0.85 | 0.86 | 1.66E-02 | 1.19E-02 | 7.12E-01 | 6.82E-01 |
| 7960575 | NM_001033714 | NOP2      | NOP2 nucleolar protein homolog (yeast)                                       | WT and L359V | 0.74 | 0.72 | 0.88 | 0.84 | 1.43E-02 | 7.09E-03 | 7.79E-01 | 4.46E-01 |
| 8012856 | NM_018127    | ELAC2     | elaC homolog 2 (E. coli)                                                     | WT and L359V | 0.77 | 0.72 | 0.83 | 0.85 | 3.00E-02 | 6.81E-03 | 4.46E-01 | 5.05E-01 |
| 8087852 | NM_017442    | TLR9      | toll-like receptor 9                                                         | WT and L359V | 0.58 | 0.72 | 0.87 | 0.75 | 8.39E-04 | 9.22E-03 | 7.67E-01 | 1.19E-01 |
| 7949577 | NM_020470    | YIF1A     | Yip1 interacting factor homolog A (S. cerevisiae)                            | WT and L359V | 0.71 | 0.72 | 0.86 | 0.83 | 1.14E-02 | 9.36E-03 | 7.24E-01 | 4.41E-01 |
| 8084397 | NM_014693    | ECE2      | endothelin converting enzyme 2                                               | WT and L359V | 0.71 | 0.72 | 0.87 | 0.83 | 4.58E-03 | 4.05E-03 | 6.75E-01 | 3.05E-01 |
| 7967624 | NM_145648    | SLC15A4   | solute carrier family 15, member 4                                           | WT and L359V | 0.69 | 0.72 | 0.83 | 0.81 | 1.31E-02 | 1.55E-02 | 6.50E-01 | 4.41E-01 |
| 7962183 | NM_001005353 | AK3L1     | adenylate kinase 3-like 1                                                    | WT and L359V | 0.67 | 0.72 | 0.92 | 0.87 | 2.45E-02 | 4.34E-02 | 8.93E-01 | 1.00E+00 |
| 8019392 | NM_004104    | FASN      | fatty acid synthase                                                          | WT and L359V | 0.70 | 0.72 | 0.80 | 0.64 | 3.92E-02 | 3.77E-02 | 6.46E-01 | 6.58E-01 |
| 8057887 | NM_004226    | STK17B    | serine                                                                       | WT and L359V | 0.78 | 0.72 | 0.92 | 0.92 | 3.31E-02 | 6.21E-03 | 8.48E-01 | 1.00E+00 |
| 7985767 | NM_022767    | AEN       | apoptosis enhancing nuclease                                                 | WT and L359V | 0.73 | 0.72 | 0.88 | 0.82 | 1.54E-02 | 8.69E-03 | 8.01E-01 | 3.81E-01 |
| 8054344 | AK298610     | FLJ42986  | FLJ42986 protein                                                             | WT and L359V | 0.66 | 0.72 | 0.92 | 0.86 | 2.55E-02 | 4.67E-02 | 9.07E-01 | 1.00E+00 |
| 8175023 | NM_016032    | ZDHHC9    | zinc finger, DHHC-type containing 9                                          | WT and L359V | 0.69 | 0.72 | 0.89 | 0.85 | 7.48E-03 | 8.30E-03 | 8.13E-01 | 5.62E-01 |
| 8069859 | NM_181619    | KRTAP21-1 | keratin associated protein 21-1                                              | WT and L359V | 0.66 | 0.71 | 0.85 | 0.79 | 7.28E-03 | 1.53E-02 | 7.62E-01 | 3.40E-01 |
| 8044745 | NM_006773    | DDX18     | DEAD (Asp-Glu-Ala-Asp) box polypeptide 18                                    | WT and L359V | 0.79 | 0.71 | 0.89 | 0.88 | 3.18E-02 | 3.73E-03 | 7.93E-01 | 7.02E-01 |
| 8171136 | NM_178129    | P2RY8     | purinergic receptor P2Y, G-protein coupled, 8                                | WT and L359V | 0.68 | 0.71 | 0.99 | 0.82 | 2.54E-02 | 3.16E-02 | 9.94E-01 | 6.69E-01 |
| 8177026 | NM_178129    | P2RY8     | purinergic receptor P2Y, G-protein coupled, 8                                | WT and L359V | 0.68 | 0.71 | 0.99 | 0.82 | 2.54E-02 | 3.16E-02 | 9.94E-01 | 6.69E-01 |
| 8032608 | NM_174983    | C19orf28  | chromosome 19 open reading frame 28                                          | WT and L359V | 0.49 | 0.71 | 0.66 | 0.67 | 7.72E-04 | 2.55E-02 | 8.69E-02 | 7.78E-02 |
| 8099037 | NM_001120    | MFSD10    | major facilitator superfamily domain containing 10                           | WT and L359V | 0.76 | 0.71 | 1.00 | 0.84 | 3.95E-02 | 1.14E-02 | 9.99E-01 | 6.27E-01 |
| 8064766 | NM_001134338 | RNF24     | ring finger protein 24                                                       | WT and L359V | 0.72 | 0.71 | 1.00 | 0.88 | 1.40E-02 | 7.85E-03 | 9.98E-01 | 8.14E-01 |
| 7963174 | NM_147190    | LASS5     | LAG1 homolog, ceramide synthase 5                                            | WT and L359V | 0.70 | 0.71 | 0.84 | 0.86 | 1.48E-02 | 1.19E-02 | 6.67E-01 | 7.89E-01 |
| 7906107 | NM_022367    | SEMA4A    | sema domain, immunoglobulin domain (Ig), transmembrane domain (TM) and short | WT and L359V | 0.71 | 0.71 | 0.84 | 0.82 | 1.81E-02 | 1.32E-02 | 6.75E-01 | 5.09E-01 |
| 8070330 | NM_003720    | PSMG1     | proteasome (prosome, macropain) assembly chaperone 1                         | WT and L359V | 0.76 | 0.71 | 0.94 | 0.91 | 2.29E-02 | 4.99E-03 | 8.86E-01 | 1.00E+00 |
| 8073752 | NM_001104595 | FAM118A   | family with sequence similarity 118, member A                                | WT and L359V | 0.75 | 0.71 | 0.87 | 0.85 | 3.97E-02 | 1.17E-02 | 8.01E-01 | 7.03E-01 |
| 8037408 | NM_002250    | KCNN4     | potassium intermediate                                                       | WT and L359V | 0.56 | 0.71 | 0.79 | 0.80 | 1.55E-03 | 1.61E-02 | 4.37E-01 | 4.14E-01 |
| 8048370 | NM_004328    | BCS1L     | BCS1-like (yeast)                                                            | WT and L359V | 0.74 | 0.71 | 0.88 | 0.86 | 2.41E-02 | 9.15E-03 | 8.09E-01 | 6.77E-01 |
| 8090678 | NM_007208    | MRPL3     | mitochondrial ribosomal protein L3                                           | WT and L359V | 0.80 | 0.71 | 0.90 | 0.90 | 3.18E-02 | 2.75E-03 | 8.01E-01 | 8.28E-01 |
| 7948267 | NM_012456    | TIMM10    | translocase of inner mitochondrial membrane 10 homolog (yeast)               | WT and L359V | 0.73 | 0.71 | 0.90 | 0.83 | 3.15E-02 | 1.44E-02 | 8.41E-01 | 5.88E-01 |
| 7961230 | NM_003651    | CSDA      | cold shock domain protein A                                                  | WT and L359V | 0.66 | 0.71 | 0.91 | 0.85 | 1.02E-02 | 1.68E-02 | 8.66E-01 | 7.47E-01 |
| 8104422 | NM_002454    | MTRR      | 5-methyltetrahydrofolate-homocysteine methyltransferase reductase            | WT and L359V | 0.79 | 0.71 | 0.91 | 0.86 | 4.63E-02 | 4.44E-03 | 8.34E-01 | 5.96E-01 |
| 8170971 | NM_001363    | DKC1      | dyskeratosis congenita 1, dyskerin                                           | WT and L359V | 0.75 | 0.71 | 0.88 | 0.87 | 2.53E-02 | 6.97E-03 | 8.01E-01 | 7.44E-01 |
| 8156404 | NM_032310    | C9orf89   | chromosome 9 open reading frame 89                                           | WT and L359V | 0.62 | 0.71 | 0.69 | 0.73 | 9.15E-03 | 2.89E-02 | 1.70E-01 | 2.61E-01 |
| 8045171 | NM_033416    | IMP4      | IMP4, U3 small nucleolar ribonucleoprotein, homolog (yeast)                  | WT and L359V | 0.69 | 0.71 | 0.90 | 0.86 | 1.14E-02 | 1.13E-02 | 8.40E-01 | 7.38E-01 |
| 8153664 | AK293719     | BOP1      | block of proliferation 1                                                     | WT and L359V | 0.56 | 0.71 | 0.79 | 0.73 | 7.03E-04 | 7.53E-03 | 3.41E-01 | 7.78E-02 |
| 8169657 | NM_001105576 | ANKRD58   | ankyrin repeat domain 58                                                     | WT and L359V | 0.70 | 0.71 | 0.88 | 0.88 | 3.89E-02 | 3.10E-02 | 8.41E-01 | 1.00E+00 |
| 7971361 | NM_012345    | NUFIP1    | nuclear fragile X mental retardation protein interacting protein 1           | WT and L359V | 0.68 | 0.71 | 0.79 | 0.81 | 5.89E-03 | 6.42E-03 | 2.90E-01 | 3.05E-01 |
| 8143905 | NM_007189    | ABCF2     | ATP-binding cassette, sub-family F (GCN20), member 2                         | WT and L359V | 0.71 | 0.71 | 0.90 | 0.86 | 7.02E-03 | 4.57E-03 | 8.20E-01 | 5.55E-01 |
| 7951838 | NM_003904    | ZNF259    | zinc finger protein 259                                                      | WT and L359V | 0.74 | 0.71 | 0.82 | 0.86 | 2.36E-02 | 7.53E-03 | 5.15E-01 | 6.45E-01 |
| 7956878 | NM_007199    | IRAK3     | interleukin-1 receptor-associated kinase 3                                   | WT and L359V | 0.68 | 0.70 | 0.78 | 0.80 | 3.84E-03 | 4.06E-03 | 1.86E-01 | 2.17E-01 |
| 8137526 | NM_198336    | INSIG1    | insulin induced gene 1                                                       | WT and L359V | 0.74 | 0.70 | 0.86 | 0.76 | 4.68E-02 | 1.47E-02 | 8.01E-01 | 2.55E-01 |
| 7928429 | NM_002658    | PLAU      | plasminogen activator, urokinase                                             | WT and L359V | 0.63 | 0.70 | 0.84 | 0.81 | 5.75E-03 | 1.56E-02 | 7.28E-01 | 5.05E-01 |
| 8014956 | NM_021724    | NR1D1     | nuclear receptor subfamily 1, group D, member 1                              | WT and L359V | 0.60 | 0.70 | 0.91 | 0.76 | 1.47E-03 | 6.65E-03 | 8.45E-01 | 1.48E-01 |
| 8063942 | NM_002531    | NTSR1     | neurotensin receptor 1 (high affinity)                                       | WT and L359V | 0.67 | 0.70 | 0.68 | 0.77 | 3.58E-02 | 4.43E-02 | 2.08E-01 | 4.98E-01 |
| 8075406 | NM_014303    | PES1      | pescadillo homolog 1, containing BRCT domain (zebrafish)                     | WT and L359V | 0.64 | 0.70 | 0.88 | 0.80 | 3.09E-03 | 6.66E-03 | 8.01E-01 | 3.05E-01 |
| 8120654 | NM_019842    | KCNQ5     | potassium voltage-gated channel, KQT-like subfamily, member 5                | WT and L359V | 0.73 | 0.70 | 0.89 | 0.85 | 2.74E-02 | 1.04E-02 | 8.23E-01 | 7.02E-01 |
| 8069943 | NM_014825    | URB1      | URB1 ribosome biogenesis 1 homolog (S. cerevisiae)                           | WT and L359V | 0.67 | 0.70 | 0.89 | 0.82 | 4.85E-03 | 5.65E-03 | 8.01E-01 | 3.31E-01 |
| 7967544 | NM_005505    | SCARB1    | scavenger receptor class B, member 1                                         | WT and L359V | 0.66 | 0.70 | 0.92 | 0.79 | 5.06E-03 | 7.43E-03 | 8.70E-01 | 2.74E-01 |
| 7901102 | NM_015506    | MMACHC    | methylmalonic aciduria (cobalamin deficiency) cbIC type, with homocystinuria | WT and L359V | 0.68 | 0.70 | 0.90 | 0.82 | 2.39E-03 | 2.76E-03 | 8.05E-01 | 2.63E-01 |
| 7957890 | NM_014503    | UTP20     | UTP20, small subunit (SSU) processome component, homolog (yeast)             | WT and L359V | 0.72 | 0.70 | 0.81 | 0.81 | 3.18E-02 | 1.61E-02 | 6.30E-01 | 5.44E-01 |
| 8112803 | NM_005779    | LHFPL2    | lipoma HMGIC fusion partner-like 2                                           | WT and L359V | 0.76 | 0.70 | 0.83 | 0.82 | 2.33E-02 | 3.88E-03 | 4.37E-01 | 3.13E-01 |
| 8080013 | NM_004635    | MAPKAPK3  | mitogen-activated protein kinase-activated protein kinase 3                  | WT and L359V | 0.75 | 0.70 | 0.90 | 0.85 | 2.37E-02 | 5.79E-03 | 8.29E-01 | 6.15E-01 |

|         |                 |          |                                                                                   |              |      |      |      |      |          |          |          |          |
|---------|-----------------|----------|-----------------------------------------------------------------------------------|--------------|------|------|------|------|----------|----------|----------|----------|
| 7993167 | NM_024997       | ATF7IP2  | activating transcription factor 7 interacting protein 2                           | WT and L359V | 0.66 | 0.70 | 0.76 | 0.83 | 1.91E-02 | 2.56E-02 | 4.70E-01 | 7.47E-01 |
| 7959986 | NM_025215       | PUS1     | pseudouridylylase synthase 1                                                      | WT and L359V | 0.73 | 0.70 | 0.94 | 0.90 | 2.57E-02 | 9.15E-03 | 8.99E-01 | 1.00E+00 |
| 8051030 | NM_021095       | SLC5A6   | solute carrier family 5 (sodium-dependent vitamin transporter), member 6          | WT and L359V | 0.72 | 0.70 | 0.89 | 0.82 | 7.35E-03 | 3.30E-03 | 7.97E-01 | 2.74E-01 |
| 8048227 | NM_001557       | IL8RB    | interleukin 8 receptor, beta                                                      | WT and L359V | 0.67 | 0.70 | 0.77 | 0.79 | 4.15E-02 | 4.53E-02 | 6.34E-01 | 6.27E-01 |
| 7930226 | NM_014976       | PDCD11   | programmed cell death 11                                                          | WT and L359V | 0.74 | 0.70 | 0.90 | 0.84 | 1.10E-02 | 2.87E-03 | 8.13E-01 | 4.02E-01 |
| 7937878 | NR_002720       | TRPC2    | transient receptor potential cation channel, subfamily C, member 2 (pseudogene)   | WT and L359V | 0.62 | 0.70 | 0.64 | 0.72 | 1.48E-02 | 3.93E-02 | 1.23E-01 | 3.05E-01 |
| 8130003 | NM_031287       | SF3B5    | splicing factor 3b, subunit 5, 10kDa                                              | WT and L359V | 0.66 | 0.69 | 0.87 | 0.79 | 1.57E-02 | 2.19E-02 | 8.34E-01 | 4.56E-01 |
| 8161829 | BC034033        | C9orf41  | chromosome 9 open reading frame 41                                                | WT and L359V | 0.74 | 0.69 | 0.81 | 0.85 | 3.53E-02 | 9.41E-03 | 5.21E-01 | 7.09E-01 |
| 8070912 | NM_194255       | SLC19A1  | solute carrier family 19 (folate transporter), member 1                           | WT and L359V | 0.67 | 0.69 | 0.88 | 0.79 | 2.82E-03 | 3.26E-03 | 7.50E-01 | 1.81E-01 |
| 8156278 | NM_005226       | S1PR3    | sphingosine-1-phosphate receptor 3                                                | WT and L359V | 0.62 | 0.69 | 0.90 | 0.83 | 4.98E-03 | 1.32E-02 | 8.58E-01 | 6.29E-01 |
| 7968242 | NM_002097       | GTF3A    | general transcription factor IIIA                                                 | WT and L359V | 0.74 | 0.69 | 0.91 | 0.87 | 4.57E-02 | 1.35E-02 | 8.76E-01 | 8.99E-01 |
| 7906904 | NM_016371       | HSD17B7  | hydroxysteroid (17-beta) dehydrogenase 7                                          | WT and L359V | 0.74 | 0.69 | 0.88 | 0.83 | 4.44E-02 | 1.22E-02 | 8.34E-01 | 5.98E-01 |
| 8152988 | NM_001045556    | SLA      | Src-like-adaptor                                                                  | WT and L359V | 0.74 | 0.69 | 0.78 | 0.83 | 2.56E-02 | 6.99E-03 | 2.79E-01 | 5.23E-01 |
| 8059319 | NM_005687       | FARSB    | phenylalanyl-tRNA synthetase, beta subunit                                        | WT and L359V | 0.78 | 0.69 | 0.95 | 0.91 | 3.26E-02 | 3.40E-03 | 8.98E-01 | 1.00E+00 |
| 7898655 | NM_001785       | CDA      | cytidine deaminase                                                                | WT and L359V | 0.68 | 0.69 | 0.93 | 0.82 | 2.09E-02 | 1.97E-02 | 9.02E-01 | 6.27E-01 |
| 8003332 | NM_002461       | MVD      | mevalonate (diphospho) decarboxylase                                              | WT and L359V | 0.73 | 0.69 | 0.88 | 0.80 | 3.87E-02 | 1.42E-02 | 8.36E-01 | 4.61E-01 |
| 8070615 | NM_018669       | WDR4     | WD repeat domain 4                                                                | WT and L359V | 0.71 | 0.69 | 0.86 | 0.86 | 3.90E-02 | 2.09E-02 | 8.16E-01 | 9.62E-01 |
| 8005475 | NM_001037330    | TRIM16L  | tripartite motif-containing 16-like                                               | WT and L359V | 0.73 | 0.69 | 0.86 | 0.85 | 1.45E-02 | 4.39E-03 | 6.89E-01 | 5.78E-01 |
| 8174779 | NM_013995       | LAMP2    | lysosomal-associated membrane protein 2                                           | WT and L359V | 0.60 | 0.69 | 0.78 | 0.81 | 1.08E-03 | 3.84E-03 | 2.00E-01 | 3.05E-01 |
| 8165094 | NM_181701       | QSOX2    | quiescin Q6 sulfhydryl oxidase 2                                                  | WT and L359V | 0.74 | 0.69 | 0.87 | 0.85 | 2.03E-02 | 4.27E-03 | 7.36E-01 | 5.96E-01 |
| 7975506 | NM_015604       | WDR21A   | WD repeat domain 21A                                                              | WT and L359V | 0.68 | 0.69 | 0.85 | 0.84 | 1.09E-02 | 7.89E-03 | 7.28E-01 | 6.17E-01 |
| 8044473 | NM_019014       | POLR1B   | polymerase (RNA) I polypeptide B, 128kDa                                          | WT and L359V | 0.64 | 0.68 | 0.84 | 0.82 | 1.25E-03 | 2.10E-03 | 4.49E-01 | 2.74E-01 |
| 7929012 | NM_020799       | STAMBPL1 | STAM binding protein-like 1                                                       | WT and L359V | 0.56 | 0.68 | 0.79 | 0.76 | 2.94E-03 | 1.57E-02 | 5.66E-01 | 3.05E-01 |
| 8108447 | NM_016463       | CXXC5    | CXXC finger 5                                                                     | WT and L359V | 0.64 | 0.68 | 0.85 | 0.82 | 1.14E-02 | 1.55E-02 | 8.01E-01 | 6.53E-01 |
| 8126296 | AF534825        | TREML3   | triggering receptor expressed on myeloid cells-like 3                             | WT and L359V | 0.56 | 0.68 | 0.82 | 0.77 | 4.81E-03 | 2.46E-02 | 7.65E-01 | 4.44E-01 |
| 8003773 | NM_015085       | GARNL4   | GTPase activating Rap                                                             | WT and L359V | 0.69 | 0.68 | 0.75 | 0.80 | 1.39E-02 | 7.76E-03 | 2.48E-01 | 3.56E-01 |
| 8078252 | NM_152653       | UBE2E2   | ubiquitin-conjugating enzyme E2E 2 (UBC4)                                         | WT and L359V | 0.66 | 0.68 | 0.87 | 0.81 | 8.36E-03 | 8.80E-03 | 8.11E-01 | 4.61E-01 |
| 7949995 | NM_181515       | MRPL21   | mitochondrial ribosomal protein L21                                               | WT and L359V | 0.74 | 0.68 | 0.93 | 0.84 | 2.54E-02 | 5.74E-03 | 8.85E-01 | 6.07E-01 |
| 8149387 | ENST00000307435 | FAM90A1  | family with sequence similarity 90, member A1                                     | WT and L359V | 0.78 | 0.68 | 0.92 | 0.82 | 4.31E-02 | 3.64E-03 | 8.64E-01 | 3.70E-01 |
| 8110755 | NM_006598       | SLC12A7  | solute carrier family 12 (potassium)                                              | WT and L359V | 0.66 | 0.68 | 0.87 | 0.81 | 1.25E-02 | 1.16E-02 | 8.16E-01 | 5.52E-01 |
| 7953914 | NM_205852       | CLEC12B  | C-type lectin domain family 12, member B                                          | WT and L359V | 1.46 | 0.68 | 1.15 | 1.04 | 3.95E-02 | 2.57E-02 | 8.38E-01 | 1.00E+00 |
| 7897236 | NM_003636       | KCNAB2   | potassium voltage-gated channel, shaker-related subfamily, beta member 2          | WT and L359V | 0.70 | 0.68 | 0.88 | 0.83 | 4.91E-03 | 1.97E-03 | 7.52E-01 | 3.31E-01 |
| 8030113 | NM_006666       | RUVBL2   | RuvB-like 2 (E. coli)                                                             | WT and L359V | 0.72 | 0.68 | 0.93 | 0.84 | 2.55E-02 | 7.15E-03 | 8.86E-01 | 6.43E-01 |
| 8090448 | NM_003707       | RUVBL1   | RuvB-like 1 (E. coli)                                                             | WT and L359V | 0.72 | 0.68 | 0.93 | 0.85 | 1.69E-02 | 4.42E-03 | 8.80E-01 | 6.43E-01 |
| 7921121 | NM_145729       | MRPL24   | mitochondrial ribosomal protein L24                                               | WT and L359V | 0.70 | 0.67 | 0.93 | 0.85 | 1.76E-02 | 7.93E-03 | 8.86E-01 | 7.15E-01 |
| 8027876 | NM_032635       | TMEM147  | transmembrane protein 147                                                         | WT and L359V | 0.66 | 0.67 | 0.91 | 0.84 | 2.08E-03 | 1.83E-03 | 8.20E-01 | 3.47E-01 |
| 8050255 | NM_024894       | NOL10    | nucleolar protein 10                                                              | WT and L359V | 0.75 | 0.67 | 0.86 | 0.85 | 1.92E-02 | 2.58E-03 | 6.53E-01 | 5.52E-01 |
| 7949904 | NM_030930       | UNC93B1  | unc-93 homolog B1 (C. elegans)                                                    | WT and L359V | 0.76 | 0.67 | 0.92 | 0.85 | 2.91E-02 | 3.61E-03 | 8.55E-01 | 6.27E-01 |
| 7978132 | NM_024658       | IPO4     | importin 4                                                                        | WT and L359V | 0.67 | 0.67 | 0.90 | 0.81 | 4.34E-03 | 3.16E-03 | 8.32E-01 | 3.25E-01 |
| 8056408 | NM_004482       | GALNT3   | UDP-N-acetyl-alpha-D-galactosamine:polypeptide N-acetyl-galactosaminyltransferase | WT and L359V | 0.72 | 0.67 | 0.96 | 0.87 | 1.43E-02 | 3.73E-03 | 9.34E-01 | 7.35E-01 |
| 8009568 | NM_032646       | TTYH2    | tweety homolog 2 (Drosophila)                                                     | WT and L359V | 0.73 | 0.67 | 0.89 | 0.85 | 3.89E-02 | 8.65E-03 | 8.41E-01 | 7.67E-01 |
| 8175835 | NM_005745       | BCAP31   | B-cell receptor-associated protein 31                                             | WT and L359V | 0.67 | 0.67 | 0.75 | 0.76 | 2.62E-02 | 1.88E-02 | 4.46E-01 | 4.02E-01 |
| 8114900 | NM_004576       | PPP2R2B  | protein phosphatase 2 (formerly 2A), regulatory subunit B, beta isoform           | WT and L359V | 0.62 | 0.67 | 0.68 | 0.76 | 1.10E-02 | 1.74E-02 | 1.72E-01 | 3.56E-01 |
| 7981161 | NM_152592       | C14orf49 | chromosome 14 open reading frame 49                                               | WT and L359V | 0.56 | 0.67 | 0.71 | 0.74 | 8.78E-04 | 4.42E-03 | 8.10E-02 | 1.32E-01 |
| 8103485 | NM_138386       | NAF1     | nuclear assembly factor 1 homolog (S. cerevisiae)                                 | WT and L359V | 0.71 | 0.67 | 0.83 | 0.80 | 2.39E-02 | 7.09E-03 | 6.71E-01 | 3.99E-01 |
| 8077914 | NM_025265       | TSEN2    | tRNA splicing endonuclease 2 homolog (S. cerevisiae)                              | WT and L359V | 0.69 | 0.67 | 0.84 | 0.87 | 9.21E-03 | 3.91E-03 | 6.10E-01 | 8.17E-01 |
| 8148955 | NM_023080       | C8orf33  | chromosome 8 open reading frame 33                                                | WT and L359V | 0.67 | 0.67 | 0.83 | 0.82 | 7.35E-03 | 4.50E-03 | 6.07E-01 | 4.41E-01 |
| 8026533 | NM_032855       | HSH2D    | hematopoietic SH2 domain containing                                               | WT and L359V | 0.67 | 0.66 | 0.94 | 0.89 | 9.21E-03 | 5.91E-03 | 9.21E-01 | 1.00E+00 |
| 7950067 | NM_001360       | DHCR7    | 7-dehydrocholesterol reductase                                                    | WT and L359V | 0.72 | 0.66 | 0.97 | 0.81 | 2.58E-02 | 6.70E-03 | 9.65E-01 | 4.56E-01 |
| 8041149 | NM_015131       | WDR43    | WD repeat domain 43                                                               | WT and L359V | 0.71 | 0.66 | 0.89 | 0.87 | 7.35E-03 | 1.94E-03 | 7.97E-01 | 6.43E-01 |
| 8154012 | NM_153186       | KANK1    | KN motif and ankyrin repeat domains 1                                             | WT and L359V | 0.63 | 0.66 | 0.81 | 0.78 | 1.93E-02 | 2.64E-02 | 7.58E-01 | 6.18E-01 |
| 7999304 | NM_201400       | FAM86A   | family with sequence similarity 86, member A                                      | WT and L359V | 0.72 | 0.66 | 0.88 | 0.83 | 3.07E-02 | 8.33E-03 | 8.36E-01 | 6.73E-01 |
| 7995926 | NM_032206       | NLRC5    | NLR family, CARD domain containing 5                                              | WT and L359V | 0.71 | 0.66 | 0.82 | 0.80 | 1.72E-02 | 5.14E-03 | 5.61E-01 | 3.63E-01 |
| 8067040 | NM_012340       | NFATC2   | nuclear factor of activated T-cells, cytoplasmic, calcineurin-dependent 2         | WT and L359V | 0.63 | 0.66 | 0.81 | 0.77 | 6.12E-03 | 7.29E-03 | 5.66E-01 | 2.83E-01 |
| 8093950 | NM_005980       | S100P    | S100 calcium binding protein P                                                    | WT and L359V | 0.49 | 0.66 | 0.95 | 0.84 | 1.82E-03 | 2.03E-02 | 9.43E-01 | 8.90E-01 |
| 8028563 | NM_021107       | MRPS12   | mitochondrial ribosomal protein S12                                               | WT and L359V | 0.68 | 0.66 | 0.89 | 0.78 | 9.03E-03 | 4.42E-03 | 8.25E-01 | 2.70E-01 |
| 8171876 | NM_023033       | METTL1   | methyltransferase like 1                                                          | WT and L359V | 0.61 | 0.66 | 0.85 | 0.79 | 4.18E-03 | 6.59E-03 | 7.50E-01 | 3.67E-01 |
| 7930008 | NM_004741       | NOLC1    | nucleolar and coiled-body phosphoprotein 1                                        | WT and L359V | 0.76 | 0.66 | 0.92 | 0.87 | 2.86E-02 | 2.60E-03 | 8.66E-01 | 6.91E-01 |
| 8080487 | NM_006254       | PRKCD    | protein kinase C, delta                                                           | WT and L359V | 0.72 | 0.66 | 0.80 | 0.80 | 4.09E-02 | 9.62E-03 | 6.26E-01 | 5.23E-01 |
| 7996934 | NM_016101       | NIP7     | nuclear import 7 homolog (S. cerevisiae)                                          | WT and L359V | 0.70 | 0.66 | 0.89 | 0.82 | 3.07E-02 | 1.16E-02 | 8.51E-01 | 6.46E-01 |
| 7917752 | ---             | ---      | ---                                                                               | WT and L359V | 0.70 | 0.66 | 0.99 | 0.80 | 1.17E-02 | 3.83E-03 | 9.93E-01 | 3.17E-01 |
| 8030721 | NM_002975       | CLEC11A  | C-type lectin domain family 11, member A                                          | WT and L359V | 0.65 | 0.66 | 0.88 | 0.77 | 1.82E-02 | 1.58E-02 | 8.41E-01 | 4.69E-01 |
| 8176026 | NM_001456       | FLNA     | filamin A, alpha (actin binding protein 280)                                      | WT and L359V | 0.73 | 0.66 | 0.90 | 0.80 | 2.42E-02 | 3.98E-03 | 8.36E-01 | 3.31E-01 |
| 7996341 | NM_020786       | PDP2     | pyruvate dehydrogenase phosphatase isoenzyme 2                                    | WT and L359V | 0.75 | 0.66 | 0.90 | 0.83 | 3.77E-02 | 4.39E-03 | 8.38E-01 | 5.69E-01 |
| 7935903 | NM_006993       | NPM3     | nucleophosmin                                                                     | WT and L359V | 0.70 | 0.66 | 0.92 | 0.83 | 4.57E-02 | 1.47E-02 | 9.01E-01 | 7.99E-01 |

|         |              |           |                                                                               |              |      |      |      |      |          |          |          |          |
|---------|--------------|-----------|-------------------------------------------------------------------------------|--------------|------|------|------|------|----------|----------|----------|----------|
| 7998637 | NM_016332    | SEPX1     | selenoprotein X, 1                                                            | WT and L359V | 0.69 | 0.65 | 0.77 | 0.76 | 9.04E-03 | 3.30E-03 | 2.50E-01 | 1.66E-01 |
| 8082816 | NM_021203    | SRPRB     | signal recognition particle receptor, B subunit                               | WT and L359V | 0.68 | 0.65 | 0.83 | 0.85 | 4.32E-02 | 1.97E-02 | 8.06E-01 | 9.56E-01 |
| 8145782 | NM_032509    | MAK16     | MAK16 homolog (S. cerevisiae)                                                 | WT and L359V | 0.77 | 0.65 | 0.90 | 0.87 | 2.62E-02 | 1.71E-03 | 8.13E-01 | 7.02E-01 |
| 8112176 | NR_023344    | RNU6ATAC  | RNA, U6atac small nuclear (U12-dependent splicing)                            | WT and L359V | 0.64 | 0.65 | 0.86 | 0.78 | 5.06E-03 | 4.33E-03 | 7.65E-01 | 3.05E-01 |
| 8082066 | NM_014367    | FAM162A   | family with sequence similarity 162, member A                                 | WT and L359V | 0.67 | 0.65 | 0.83 | 0.86 | 5.06E-03 | 2.49E-03 | 5.24E-01 | 6.27E-01 |
| 7990757 | NM_004390    | CTSH      | cathepsin H                                                                   | WT and L359V | 0.64 | 0.65 | 0.73 | 0.80 | 3.91E-03 | 3.00E-03 | 1.15E-01 | 3.12E-01 |
| 7900911 | NM_001384    | DPH2      | DPH2 homolog (S. cerevisiae)                                                  | WT and L359V | 0.62 | 0.65 | 0.81 | 0.75 | 1.11E-03 | 1.27E-03 | 3.22E-01 | 7.78E-02 |
| 8160682 | NM_022917    | NOL6      | nucleolar protein family 6 (RNA-associated)                                   | WT and L359V | 0.65 | 0.65 | 0.84 | 0.75 | 1.59E-03 | 1.08E-03 | 4.84E-01 | 6.58E-02 |
| 7898549 | NM_016183    | MRT04     | mRNA turnover 4 homolog (S. cerevisiae)                                       | WT and L359V | 0.65 | 0.65 | 0.86 | 0.81 | 2.64E-03 | 1.67E-03 | 7.09E-01 | 2.74E-01 |
| 8173232 | NM_152424    | FAM123B   | family with sequence similarity 123B                                          | WT and L359V | 0.72 | 0.65 | 0.91 | 0.82 | 1.92E-02 | 3.65E-03 | 8.68E-01 | 4.56E-01 |
| 7943690 | NM_004398    | DDX10     | DEAD (Asp-Glu-Ala-Asp) box polypeptide 10                                     | WT and L359V | 0.72 | 0.64 | 0.87 | 0.85 | 9.91E-03 | 1.49E-03 | 7.50E-01 | 5.04E-01 |
| 8041961 | NM_001008708 | CHAC2     | ChaC, cation transport regulator homolog 2 (E. coli)                          | WT and L359V | 0.72 | 0.64 | 0.86 | 0.82 | 2.41E-02 | 4.12E-03 | 7.94E-01 | 5.28E-01 |
| 7949971 | NM_001876    | CPT1A     | carnitine palmitoyltransferase 1A (liver)                                     | WT and L359V | 0.76 | 0.64 | 0.93 | 0.87 | 3.77E-02 | 2.76E-03 | 8.81E-01 | 8.38E-01 |
| 7929243 | AF401219     | NHP2      | NHP2 ribonucleoprotein homolog (yeast)                                        | WT and L359V | 0.75 | 0.64 | 0.89 | 0.82 | 1.32E-02 | 9.58E-04 | 7.85E-01 | 2.61E-01 |
| 8040655 | NM_033505    | SELI      | selenoprotein I                                                               | WT and L359V | 0.76 | 0.64 | 0.90 | 0.88 | 2.67E-02 | 1.86E-03 | 8.25E-01 | 8.17E-01 |
| 7900365 | NM_001136493 | MFSD2     | major facilitator superfamily domain containing 2                             | WT and L359V | 0.73 | 0.64 | 0.82 | 0.80 | 2.02E-02 | 2.28E-03 | 5.05E-01 | 3.17E-01 |
| 7914112 | NM_005248    | FGR       | Gardner-Rasheed feline sarcoma viral (v-fgr) oncogene homolog                 | WT and L359V | 0.59 | 0.64 | 0.79 | 0.74 | 4.76E-03 | 7.29E-03 | 5.76E-01 | 2.58E-01 |
| 8052399 | NM_022893    | BCL11A    | B-cell CLL                                                                    | WT and L359V | 0.68 | 0.64 | 0.92 | 0.87 | 1.48E-02 | 5.10E-03 | 8.82E-01 | 9.45E-01 |
| 7909188 | NM_014002    | IKBKE     | inhibitor of kappa light polypeptide gene enhancer in B-cells, kinase epsilon | WT and L359V | 0.61 | 0.64 | 0.79 | 0.75 | 7.00E-03 | 7.40E-03 | 5.69E-01 | 3.05E-01 |
| 8003875 | NM_001124758 | SPNS2     | spinster homolog 2 (Drosophila)                                               | WT and L359V | 0.59 | 0.63 | 0.81 | 0.76 | 2.23E-03 | 3.57E-03 | 5.66E-01 | 2.54E-01 |
| 8088830 | NM_018130    | SHQ1      | SHQ1 homolog (S. cerevisiae)                                                  | WT and L359V | 0.72 | 0.63 | 0.84 | 0.82 | 1.93E-02 | 2.38E-03 | 6.44E-01 | 4.61E-01 |
| 8058373 | NM_018256    | WDR12     | WD repeat domain 12                                                           | WT and L359V | 0.72 | 0.63 | 0.92 | 0.86 | 4.61E-02 | 7.53E-03 | 9.01E-01 | 9.63E-01 |
| 7928589 | NM_005729    | PPIF      | peptidylprolyl isomerase F                                                    | WT and L359V | 0.70 | 0.63 | 0.85 | 0.80 | 1.37E-02 | 2.42E-03 | 7.19E-01 | 3.40E-01 |
| 8105663 | NM_020726    | NLN       | neurolysin (metallopeptidase M3 family)                                       | WT and L359V | 0.73 | 0.63 | 0.92 | 0.86 | 1.37E-02 | 1.12E-03 | 8.46E-01 | 6.13E-01 |
| 8011293 | NM_015229    | KIAA0664  | KIAA0664                                                                      | WT and L359V | 0.69 | 0.63 | 0.89 | 0.79 | 4.62E-03 | 8.46E-04 | 8.01E-01 | 1.49E-01 |
| 8060940 | NM_012261    | C20orf103 | chromosome 20 open reading frame 103                                          | WT and L359V | 0.59 | 0.63 | 0.81 | 0.81 | 1.25E-03 | 1.89E-03 | 4.37E-01 | 3.47E-01 |
| 8069085 | NM_003307    | TRPM2     | transient receptor potential cation channel, subfamily M, member 2            | WT and L359V | 0.61 | 0.63 | 0.90 | 0.79 | 4.08E-03 | 3.61E-03 | 8.41E-01 | 3.50E-01 |
| 7973067 | NM_000270    | NP        | nucleoside phosphorylase                                                      | WT and L359V | 0.66 | 0.63 | 0.80 | 0.79 | 5.75E-03 | 2.31E-03 | 4.37E-01 | 3.05E-01 |
| 8156321 | NM_003177    | SYK       | spleen tyrosine kinase                                                        | WT and L359V | 0.68 | 0.63 | 0.79 | 0.80 | 4.82E-03 | 1.23E-03 | 2.85E-01 | 2.71E-01 |
| 8106193 | NM_032175    | UTP15     | UTP15, U3 small nucleolar ribonucleoprotein, homolog (S. cerevisiae)          | WT and L359V | 0.75 | 0.63 | 0.84 | 0.84 | 4.99E-02 | 3.62E-03 | 7.38E-01 | 6.56E-01 |
| 7897877 | NM_001066    | TNFRSF1B  | tumor necrosis factor receptor superfamily, member 1B                         | WT and L359V | 0.55 | 0.63 | 0.79 | 0.75 | 1.08E-03 | 2.61E-03 | 3.90E-01 | 1.67E-01 |
| 8066939 | NM_004776    | B4GALT5   | UDP-Gal:betaGlcNAc beta 1,4- galactosyltransferase, polypeptide 5             | WT and L359V | 0.71 | 0.63 | 0.77 | 0.78 | 1.48E-02 | 2.38E-03 | 3.02E-01 | 2.63E-01 |
| 8136918 | NM_003461    | ZYX       | zyxin                                                                         | WT and L359V | 0.65 | 0.63 | 0.75 | 0.74 | 4.85E-03 | 2.04E-03 | 1.72E-01 | 1.26E-01 |
| 7947861 | NM_001080547 | SP1       | spleen focus forming virus (SFFV) proviral integration oncogene sp1           | WT and L359V | 0.64 | 0.63 | 0.89 | 0.76 | 5.50E-03 | 2.76E-03 | 8.36E-01 | 2.29E-01 |
| 8022118 | NM_012307    | EPB41L3   | erythrocyte membrane protein band 4.1-like 3                                  | WT and L359V | 0.62 | 0.63 | 0.70 | 0.78 | 4.98E-03 | 3.68E-03 | 1.17E-01 | 3.37E-01 |
| 7950731 | NM_199418    | PRCP      | prolylcarboxypeptidase (angiotensinase C)                                     | WT and L359V | 0.73 | 0.63 | 0.85 | 0.86 | 2.40E-02 | 2.09E-03 | 7.38E-01 | 7.44E-01 |
| 8043621 | NM_212481    | ARID5A    | AT rich interactive domain 5A (MRF1-like)                                     | WT and L359V | 0.71 | 0.63 | 0.82 | 0.79 | 2.26E-02 | 3.40E-03 | 6.52E-01 | 3.70E-01 |
| 7975787 | NM_001135049 | JDP2      | Jun dimerization protein 2                                                    | WT and L359V | 0.73 | 0.62 | 0.95 | 0.86 | 4.30E-02 | 4.79E-03 | 9.31E-01 | 9.32E-01 |
| 7937039 | NM_001005463 | EBF3      | early B-cell factor 3                                                         | WT and L359V | 0.54 | 0.62 | 0.84 | 0.78 | 2.57E-03 | 7.53E-03 | 7.97E-01 | 4.46E-01 |
| 8143575 | NM_005232    | EPHA1     | EPH receptor A1                                                               | WT and L359V | 0.55 | 0.62 | 0.66 | 0.72 | 2.64E-03 | 5.65E-03 | 9.60E-02 | 1.89E-01 |
| 8097647 | NM_002940    | ABCE1     | ATP-binding cassette, sub-family E (OABP), member 1                           | WT and L359V | 0.76 | 0.62 | 0.87 | 0.86 | 2.50E-02 | 1.06E-03 | 7.50E-01 | 6.27E-01 |
| 7962689 | NM_001017535 | VDR       | vitamin D (1,25- dihydroxyvitamin D3) receptor                                | WT and L359V | 0.59 | 0.62 | 0.65 | 0.71 | 1.91E-02 | 2.33E-02 | 2.51E-01 | 3.85E-01 |
| 8011640 | NM_014520    | MYBBP1A   | MYB binding protein (P160) 1a                                                 | WT and L359V | 0.66 | 0.62 | 0.86 | 0.79 | 3.09E-03 | 1.03E-03 | 7.13E-01 | 2.24E-01 |
| 7944667 | NM_003105    | SORL1     | sorilin-related receptor, L(DLR class) A repeats-containing                   | WT and L359V | 0.63 | 0.62 | 0.78 | 0.78 | 4.00E-03 | 2.10E-03 | 3.69E-01 | 2.78E-01 |
| 7953321 | NM_002342    | LTBR      | lymphotoxin beta receptor (TNFR superfamily, member 3)                        | WT and L359V | 0.66 | 0.62 | 0.79 | 0.81 | 7.41E-03 | 2.49E-03 | 4.22E-01 | 4.23E-01 |
| 7951485 | NM_017515    | SLC35F2   | solute carrier family 35, member F2                                           | WT and L359V | 0.77 | 0.62 | 1.04 | 0.88 | 3.70E-02 | 1.03E-03 | 9.44E-01 | 8.35E-01 |
| 8126839 | NM_014452    | TNFRSF21  | tumor necrosis factor receptor superfamily, member 21                         | WT and L359V | 0.71 | 0.62 | 0.89 | 0.78 | 2.89E-02 | 3.86E-03 | 8.41E-01 | 3.70E-01 |
| 8068231 | NM_005806    | OLIG2     | oligodendrocyte lineage transcription factor 2                                | WT and L359V | 0.72 | 0.62 | 1.01 | 0.83 | 2.78E-02 | 2.82E-03 | 9.90E-01 | 6.27E-01 |
| 8087790 | NM_004704    | RRP9      | ribosomal RNA processing 9, small subunit (SSU) processome component, homolog | WT and L359V | 0.64 | 0.61 | 0.82 | 0.77 | 1.03E-02 | 4.26E-03 | 6.79E-01 | 3.56E-01 |
| 8064014 | NM_022082    | C20orf59  | chromosome 20 open reading frame 59                                           | WT and L359V | 0.62 | 0.61 | 0.90 | 0.77 | 3.09E-03 | 1.89E-03 | 8.36E-01 | 2.15E-01 |
| 7949104 | NM_001098671 | RASGRP2   | RAS guanyl releasing protein 2 (calcium and DAG-regulated)                    | WT and L359V | 0.71 | 0.61 | 0.91 | 0.81 | 1.39E-02 | 1.51E-03 | 8.41E-01 | 3.47E-01 |
| 8157843 | NM_005833    | RABEPK    | Rab9 effector protein with kelch motifs                                       | WT and L359V | 0.67 | 0.61 | 0.81 | 0.78 | 2.29E-02 | 5.34E-03 | 6.89E-01 | 4.71E-01 |
| 8063923 | NM_016354    | SLCO4A1   | solute carrier organic anion transporter family, member 4A1                   | WT and L359V | 0.51 | 0.61 | 0.72 | 0.72 | 3.09E-04 | 1.21E-03 | 9.54E-02 | 7.24E-02 |
| 8099107 | NM_017816    | LYAR      | Ly1 antibody reactive homolog (mouse)                                         | WT and L359V | 0.68 | 0.61 | 0.85 | 0.83 | 1.22E-02 | 2.19E-03 | 7.44E-01 | 5.78E-01 |
| 8115907 | NM_016391    | NOP16     | NOP16 nucleolar protein homolog (yeast)                                       | WT and L359V | 0.69 | 0.61 | 0.86 | 0.81 | 1.56E-02 | 2.75E-03 | 7.99E-01 | 4.75E-01 |
| 7927936 | NM_004728    | DDX21     | DEAD (Asp-Glu-Ala-Asp) box polypeptide 21                                     | WT and L359V | 0.74 | 0.61 | 0.96 | 0.87 | 1.33E-02 | 6.95E-04 | 9.22E-01 | 6.27E-01 |
| 7935146 | NM_022451    | NOC3L     | nucleolar complex associated 3 homolog (S. cerevisiae)                        | WT and L359V | 0.73 | 0.61 | 0.88 | 0.84 | 1.20E-02 | 6.95E-04 | 7.46E-01 | 4.56E-01 |
| 7899096 | NM_015871    | ZNF593    | zinc finger protein 593                                                       | WT and L359V | 0.66 | 0.61 | 0.84 | 0.78 | 5.89E-03 | 1.41E-03 | 6.28E-01 | 2.35E-01 |
| 8005097 | NM_006041    | HS3ST3B1  | heparan sulfate (glucosamine) 3-O-sulfotransferase 3B1                        | WT and L359V | 0.64 | 0.61 | 0.82 | 0.83 | 2.02E-02 | 7.93E-03 | 7.90E-01 | 8.42E-01 |
| 8052331 | NM_033109    | PNPT1     | polyribonucleotide nucleotidyltransferase 1                                   | WT and L359V | 0.76 | 0.61 | 0.87 | 0.84 | 1.52E-02 | 3.96E-04 | 6.28E-01 | 3.40E-01 |
| 8066038 | NM_032214    | SLA2      | Src-like-adaptor 2                                                            | WT and L359V | 0.54 | 0.61 | 0.67 | 0.68 | 3.25E-03 | 6.44E-03 | 1.55E-01 | 1.49E-01 |
| 8056113 | NM_002349    | LY75      | lymphocyte antigen 75                                                         | WT and L359V | 0.67 | 0.61 | 0.78 | 0.78 | 2.06E-02 | 4.79E-03 | 5.15E-01 | 4.46E-01 |
| 8099797 | NM_001085399 | RELL1     | RELT-like 1                                                                   | WT and L359V | 0.69 | 0.61 | 0.86 | 0.84 | 5.15E-03 | 6.63E-04 | 6.65E-01 | 4.04E-01 |
| 8071036 | NM_006272    | S100B     | S100 calcium binding protein B                                                | WT and L359V | 0.55 | 0.61 | 0.73 | 0.71 | 5.66E-04 | 1.08E-03 | 9.60E-02 | 5.73E-02 |
| 7944769 | NM_020716    | GRAMD1B   | GRAM domain containing 1B                                                     | WT and L359V | 0.57 | 0.61 | 0.84 | 0.79 | 2.78E-02 | 3.14E-02 | 8.56E-01 | 8.85E-01 |

|         |                 |           |                                                                                    |              |      |      |      |      |          |          |          |          |
|---------|-----------------|-----------|------------------------------------------------------------------------------------|--------------|------|------|------|------|----------|----------|----------|----------|
| 8113039 | NM_002397       | MEF2C     | myocyte enhancer factor 2C                                                         | WT and L359V | 0.61 | 0.60 | 0.74 | 0.74 | 3.56E-02 | 2.30E-02 | 6.73E-01 | 6.13E-01 |
| 8068422 | NM_005128       | DOPEY2    | dopey family member 2                                                              | WT and L359V | 0.76 | 0.60 | 0.81 | 0.82 | 3.27E-02 | 8.70E-04 | 4.13E-01 | 3.63E-01 |
| 7935425 | NM_015179       | RRP12     | ribosomal RNA processing 12 homolog (S. cerevisiae)                                | WT and L359V | 0.59 | 0.60 | 0.82 | 0.76 | 5.66E-04 | 4.72E-04 | 3.95E-01 | 9.04E-02 |
| 8159127 | NM_002957       | RXRA      | retinoid X receptor, alpha                                                         | WT and L359V | 0.68 | 0.59 | 0.84 | 0.73 | 3.50E-03 | 4.56E-04 | 4.84E-01 | 5.73E-02 |
| 8081241 | BC006512        | C3orf26   | chromosome 3 open reading frame 26                                                 | WT and L359V | 0.66 | 0.59 | 0.89 | 0.82 | 4.62E-03 | 8.34E-04 | 8.13E-01 | 3.50E-01 |
| 8020702 | NM_005640       | TAF4B     | TAF4b RNA polymerase II, TATA box binding protein (TBP)-associated factor, 105kDa  | WT and L359V | 0.71 | 0.59 | 1.04 | 0.89 | 3.23E-02 | 2.95E-03 | 9.52E-01 | 1.00E+00 |
| 7953100 | NM_002014       | FKBP4     | FK506 binding protein 4, 59kDa                                                     | WT and L359V | 0.64 | 0.59 | 0.86 | 0.77 | 2.58E-03 | 6.80E-04 | 6.79E-01 | 1.49E-01 |
| 7963614 | NM_000889       | ITGB7     | integrin, beta 7                                                                   | WT and L359V | 0.49 | 0.59 | 0.63 | 0.63 | 1.21E-03 | 3.97E-03 | 7.35E-02 | 5.73E-02 |
| 8115410 | NM_015465       | GEMIN5    | gem (nuclear organelle) associated protein 5                                       | WT and L359V | 0.63 | 0.59 | 0.81 | 0.78 | 2.08E-03 | 6.95E-04 | 4.23E-01 | 1.94E-01 |
| 8033587 | NM_032152       | PRAM1     | PML-RARA regulated adaptor molecule 1                                              | WT and L359V | 0.45 | 0.59 | 0.60 | 0.67 | 1.25E-03 | 7.53E-03 | 8.10E-02 | 1.68E-01 |
| 7986214 | NM_013272       | SLCO3A1   | solute carrier organic anion transporter family, member 3A1                        | WT and L359V | 0.63 | 0.59 | 0.75 | 0.74 | 1.30E-03 | 3.96E-04 | 9.07E-02 | 6.10E-02 |
| 8136662 | NM_004668       | MGAM      | maltase-glucoamylase (alpha-glucosidase)                                           | WT and L359V | 0.61 | 0.59 | 0.69 | 0.69 | 2.50E-02 | 1.34E-02 | 4.12E-01 | 3.05E-01 |
| 8018352 | NM_001126121    | SLC25A19  | solute carrier family 25 (mitochondrial thiamine pyrophosphate carrier), member 19 | WT and L359V | 0.63 | 0.59 | 0.83 | 0.77 | 5.38E-03 | 1.57E-03 | 6.83E-01 | 2.78E-01 |
| 8099246 | NM_025196       | GRPEL1    | GrpE-like 1, mitochondrial (E. coli)                                               | WT and L359V | 0.72 | 0.58 | 0.86 | 0.83 | 2.41E-02 | 1.20E-03 | 7.79E-01 | 5.95E-01 |
| 8158568 | NM_006676       | USP20     | ubiquitin specific peptidase 20                                                    | WT and L359V | 0.65 | 0.58 | 0.88 | 0.77 | 4.76E-03 | 8.51E-04 | 8.01E-01 | 1.94E-01 |
| 7972557 | NM_004951       | GPR183    | G protein-coupled receptor 183                                                     | WT and L359V | 0.50 | 0.58 | 0.58 | 0.66 | 3.06E-03 | 6.97E-03 | 6.69E-02 | 1.74E-01 |
| 8066431 | NM_000022       | ADA       | adenosine deaminase                                                                | WT and L359V | 0.60 | 0.57 | 0.81 | 0.83 | 1.22E-02 | 5.21E-03 | 7.51E-01 | 8.84E-01 |
| 8146685 | NM_015169       | RRS1      | RRS1 ribosome biogenesis regulator homolog (S. cerevisiae)                         | WT and L359V | 0.64 | 0.57 | 0.77 | 0.79 | 2.04E-02 | 4.78E-03 | 6.04E-01 | 6.19E-01 |
| 8003298 | NM_003486       | SLC7A5    | solute carrier family 7 (cationic amino acid transporter, y+ system), member 5     | WT and L359V | 0.62 | 0.57 | 0.97 | 0.82 | 5.05E-03 | 1.33E-03 | 9.69E-01 | 5.52E-01 |
| 7911178 | NM_004895       | NLRP3     | NLR family, pyrin domain containing 3                                              | WT and L359V | 0.66 | 0.57 | 0.89 | 0.78 | 1.96E-02 | 2.67E-03 | 8.59E-01 | 4.46E-01 |
| 7940762 | NM_033101       | LGALS12   | lectin, galactoside-binding, soluble, 12                                           | WT and L359V | 0.66 | 0.57 | 0.82 | 0.74 | 2.88E-02 | 4.05E-03 | 7.92E-01 | 3.31E-01 |
| 8132347 | NM_181791       | GPR141    | G protein-coupled receptor 141                                                     | WT and L359V | 0.70 | 0.57 | 0.74 | 0.75 | 4.58E-02 | 3.65E-03 | 4.36E-01 | 3.70E-01 |
| 8142061 | NM_019042       | PUS7      | pseudouridylate synthase 7 homolog (S. cerevisiae)                                 | WT and L359V | 0.68 | 0.56 | 0.82 | 0.80 | 1.19E-02 | 8.96E-04 | 6.12E-01 | 4.03E-01 |
| 7915485 | NM_006824       | EBNA1BP2  | EBNA1 binding protein 2                                                            | WT and L359V | 0.65 | 0.56 | 0.80 | 0.80 | 3.13E-02 | 5.62E-03 | 7.46E-01 | 7.13E-01 |
| 8163149 | NM_002829       | PTPN3     | protein tyrosine phosphatase, non-receptor type 3                                  | WT and L359V | 0.48 | 0.56 | 0.66 | 0.71 | 1.31E-03 | 3.54E-03 | 1.45E-01 | 2.25E-01 |
| 7996064 | NM_153837       | GPR114    | G protein-coupled receptor 114                                                     | WT and L359V | 0.69 | 0.56 | 0.81 | 0.72 | 1.25E-02 | 7.94E-04 | 4.84E-01 | 9.67E-02 |
| 8138487 | XR_018343       | LOC340274 | argininosuccinate synthase-like                                                    | WT and L359V | 0.56 | 0.56 | 0.76 | 0.90 | 2.78E-02 | 1.93E-02 | 7.74E-01 | 1.00E+00 |
| 8083839 | NM_014373       | GPR160    | G protein-coupled receptor 160                                                     | WT and L359V | 0.69 | 0.56 | 0.87 | 0.85 | 3.09E-02 | 2.42E-03 | 8.34E-01 | 8.84E-01 |
| 7929901 | NM_021830       | C10orf2   | chromosome 10 open reading frame 2                                                 | WT and L359V | 0.71 | 0.56 | 0.77 | 0.80 | 1.54E-02 | 6.55E-04 | 2.80E-01 | 3.24E-01 |
| 7975976 | NM_012111       | AHSA1     | AHA1, activator of heat shock 90kDa protein ATPase homolog 1 (yeast)               | WT and L359V | 0.73 | 0.56 | 0.81 | 0.75 | 2.74E-02 | 8.47E-04 | 5.47E-01 | 1.94E-01 |
| 8085206 | NM_003656       | CAMK1     | calcium                                                                            | WT and L359V | 0.71 | 0.56 | 0.87 | 0.79 | 1.38E-02 | 5.35E-04 | 7.79E-01 | 2.74E-01 |
| 8165398 | NM_004479       | FUT7      | fucosyltransferase 7 (alpha (1,3) fucosyltransferase)                              | WT and L359V | 0.60 | 0.56 | 0.71 | 0.73 | 2.88E-03 | 9.59E-04 | 1.23E-01 | 1.52E-01 |
| 8061416 | NM_003650       | CST7      | cystatin F (leukocystatin)                                                         | WT and L359V | 0.44 | 0.55 | 0.92 | 0.76 | 1.37E-02 | 4.31E-02 | 9.52E-01 | 9.72E-01 |
| 8082058 | NM_005213       | CSTA      | cystatin A (stefin A)                                                              | WT and L359V | 0.65 | 0.55 | 0.71 | 0.74 | 1.55E-02 | 2.38E-03 | 2.50E-01 | 3.05E-01 |
| 8013068 | NM_178836       | PLD6      | phospholipase D family, member 6                                                   | WT and L359V | 0.57 | 0.55 | 0.79 | 0.76 | 1.49E-03 | 7.77E-04 | 4.14E-01 | 2.15E-01 |
| 7985099 | NM_003978       | PSTPIP1   | proline-serine-threonine phosphatase interacting protein 1                         | WT and L359V | 0.51 | 0.55 | 0.68 | 0.72 | 9.37E-04 | 1.20E-03 | 9.97E-02 | 1.49E-01 |
| 8148304 | NM_025195       | TRIB1     | tribbles homolog 1 (Drosophila)                                                    | WT and L359V | 0.58 | 0.55 | 0.79 | 0.75 | 2.36E-03 | 8.80E-04 | 4.49E-01 | 2.18E-01 |
| 7966749 | NM_017899       | TESC      | tescalcin                                                                          | WT and L359V | 0.52 | 0.55 | 0.70 | 0.69 | 1.59E-03 | 1.57E-03 | 1.88E-01 | 1.26E-01 |
| 7954864 | AK093065        | MUC19     | mucin 19, oligomeric                                                               | WT and L359V | 0.56 | 0.55 | 0.73 | 0.75 | 1.83E-03 | 1.03E-03 | 2.10E-01 | 2.24E-01 |
| 8172425 | NM_033518       | SLC38A5   | solute carrier family 38, member 5                                                 | WT and L359V | 0.59 | 0.54 | 0.85 | 0.76 | 1.69E-03 | 5.01E-04 | 7.26E-01 | 1.86E-01 |
| 8024048 | NM_002777       | PRTN3     | proteinase 3                                                                       | WT and L359V | 0.58 | 0.54 | 0.80 | 0.74 | 3.09E-03 | 1.11E-03 | 5.47E-01 | 2.25E-01 |
| 8064978 | NM_000214       | JAG1      | jagged 1 (Alagille syndrome)                                                       | WT and L359V | 0.66 | 0.54 | 0.81 | 0.83 | 1.90E-03 | 1.74E-04 | 2.93E-01 | 3.10E-01 |
| 8027556 | NM_002333       | LRP3      | low density lipoprotein receptor-related protein 3                                 | WT and L359V | 0.52 | 0.54 | 0.78 | 0.70 | 4.43E-04 | 4.04E-04 | 2.98E-01 | 5.73E-02 |
| 8032623 | NM_001060       | TBXA2R    | thromboxane A2 receptor                                                            | WT and L359V | 0.49 | 0.54 | 0.68 | 0.72 | 1.90E-03 | 2.76E-03 | 2.00E-01 | 2.81E-01 |
| 8148317 | NM_002467       | MYC       | v-myc myelocytomatosis viral oncogene homolog (avian)                              | WT and L359V | 0.60 | 0.54 | 0.95 | 0.80 | 4.98E-03 | 1.20E-03 | 9.34E-01 | 5.28E-01 |
| 7899394 | NM_001105556    | C1orf38   | chromosome 1 open reading frame 38                                                 | WT and L359V | 0.67 | 0.54 | 0.85 | 0.77 | 1.03E-02 | 6.95E-04 | 7.50E-01 | 2.63E-01 |
| 7952335 | NR_003125       | LOC85391  | RNA, small nucleolar                                                               | WT and L359V | 0.51 | 0.54 | 0.89 | 0.73 | 2.10E-03 | 2.10E-03 | 8.59E-01 | 2.81E-01 |
| 8130539 | NM_054114       | TAGAP     | T-cell activation RhoGTPase activating protein                                     | WT and L359V | 0.60 | 0.53 | 0.83 | 0.76 | 6.10E-03 | 1.21E-03 | 7.42E-01 | 3.31E-01 |
| 8073890 | NM_015124       | GRAMD4    | GRAM domain containing 4                                                           | WT and L359V | 0.64 | 0.53 | 0.85 | 0.80 | 1.09E-02 | 1.03E-03 | 8.01E-01 | 5.10E-01 |
| 8021653 | NM_002640       | SERPINB8  | serpin peptidase inhibitor, clade B (ovalbumin), member 8                          | WT and L359V | 0.60 | 0.52 | 0.92 | 0.74 | 6.62E-03 | 1.20E-03 | 8.88E-01 | 2.70E-01 |
| 7905028 | ENST00000271699 | LOC645166 | similar to lymphocyte-specific protein 1                                           | WT and L359V | 0.68 | 0.52 | 0.81 | 0.74 | 1.92E-02 | 8.25E-04 | 6.12E-01 | 2.14E-01 |
| 8129848 | NM_052962       | IL22RA2   | interleukin 22 receptor, alpha 2                                                   | WT and L359V | 0.57 | 0.52 | 0.67 | 0.67 | 7.18E-03 | 2.38E-03 | 2.00E-01 | 1.66E-01 |
| 8000184 | NM_005849       | IGSF6     | immunoglobulin superfamily, member 6                                               | WT and L359V | 0.52 | 0.52 | 0.60 | 0.63 | 5.21E-03 | 3.32E-03 | 9.60E-02 | 1.25E-01 |
| 7956856 | NM_001031679    | MSRB3     | methionine sulfoxide reductase B3                                                  | WT and L359V | 0.60 | 0.52 | 0.80 | 0.77 | 1.10E-02 | 1.89E-03 | 7.28E-01 | 4.78E-01 |
| 7960518 | NM_001065       | TNFRSF1A  | tumor necrosis factor receptor superfamily, member 1A                              | WT and L359V | 0.50 | 0.51 | 0.73 | 0.70 | 3.06E-03 | 2.44E-03 | 4.60E-01 | 2.78E-01 |
| 8063497 | NM_020356       | CASS4     | Cas scaffolding protein family member 4                                            | WT and L359V | 0.50 | 0.51 | 0.53 | 0.61 | 2.78E-02 | 2.59E-02 | 2.40E-01 | 3.97E-01 |
| 7940349 | NM_024098       | CCDC86    | coiled-coil domain containing 86                                                   | WT and L359V | 0.73 | 0.51 | 0.95 | 0.79 | 7.93E-03 | 8.06E-05 | 9.08E-01 | 1.49E-01 |
| 8024038 | NM_001700       | AZU1      | azurocidin 1                                                                       | WT and L359V | 0.60 | 0.51 | 0.81 | 0.73 | 2.39E-03 | 3.55E-04 | 4.96E-01 | 1.25E-01 |
| 8062444 | NM_001725       | BPI       | bactericidal                                                                       | WT and L359V | 0.56 | 0.51 | 0.75 | 0.74 | 1.25E-02 | 3.90E-03 | 6.39E-01 | 5.14E-01 |
| 7906386 | NM_152501       | PYHIN1    | pyrin and HIN domain family, member 1                                              | WT and L359V | 0.57 | 0.51 | 0.82 | 0.73 | 3.38E-02 | 9.72E-03 | 8.40E-01 | 6.73E-01 |
| 8041061 | NM_153021       | PLB1      | phospholipase B1                                                                   | WT and L359V | 0.57 | 0.51 | 0.78 | 0.71 | 4.10E-03 | 8.80E-04 | 5.29E-01 | 1.73E-01 |
| 7904364 | NM_006784       | WDR3      | WD repeat domain 3                                                                 | WT and L359V | 0.63 | 0.51 | 0.83 | 0.78 | 2.14E-02 | 2.10E-03 | 8.14E-01 | 5.88E-01 |
| 7927186 | NM_032023       | RASSF4    | Ras association (RalGDS                                                            | WT and L359V | 0.45 | 0.51 | 0.66 | 0.69 | 4.00E-04 | 6.32E-04 | 8.10E-02 | 9.67E-02 |
| 8127854 | NM_002395       | ME1       | malic enzyme 1, NADP(+)-dependent, cytosolic                                       | WT and L359V | 0.56 | 0.50 | 0.83 | 0.73 | 9.37E-04 | 2.73E-04 | 6.00E-01 | 1.22E-01 |
| 8127549 | NM_012434       | SLC17A5   | solute carrier family 17 (anion                                                    | WT and L359V | 0.59 | 0.50 | 0.72 | 0.65 | 7.66E-03 | 1.18E-03 | 3.14E-01 | 9.04E-02 |

|         |                 |           |                                                                                    |              |      |      |      |      |          |          |          |          |
|---------|-----------------|-----------|------------------------------------------------------------------------------------|--------------|------|------|------|------|----------|----------|----------|----------|
| 8102950 | NM_003866       | INPP4B    | inositol polyphosphate-4-phosphatase, type II, 105kDa                              | WT and L359V | 0.68 | 0.50 | 0.69 | 0.74 | 1.14E-02 | 3.55E-04 | 8.10E-02 | 1.73E-01 |
| 8133442 | NM_032464       | LAT2      | linker for activation of T cells family, member 2                                  | WT and L359V | 0.54 | 0.49 | 0.76 | 0.79 | 9.31E-04 | 2.76E-04 | 2.79E-01 | 3.05E-01 |
| 7998927 | ---             | ---       | ---                                                                                | WT and L359V | 0.46 | 0.48 | 0.71 | 0.56 | 2.40E-02 | 2.47E-02 | 8.01E-01 | 3.05E-01 |
| 8158671 | NM_000050       | ASS1      | argininosuccinate synthetase 1                                                     | WT and L359V | 0.46 | 0.48 | 0.78 | 0.81 | 1.02E-02 | 9.41E-03 | 8.23E-01 | 1.00E+00 |
| 8113800 | NM_001999       | FBN2      | fibrillin 2                                                                        | WT and L359V | 0.67 | 0.48 | 0.85 | 0.78 | 7.96E-03 | 1.89E-04 | 7.41E-01 | 2.70E-01 |
| 8100541 | NM_001553       | IGFBP7    | insulin-like growth factor binding protein 7                                       | WT and L359V | 0.64 | 0.47 | 0.74 | 0.75 | 1.24E-02 | 4.56E-04 | 3.30E-01 | 3.05E-01 |
| 8131927 | NM_016447       | MPP6      | membrane protein, palmitoylated 6 (MAGUK p55 subfamily member 6)                   | WT and L359V | 0.68 | 0.47 | 0.84 | 0.81 | 2.06E-02 | 3.91E-04 | 7.74E-01 | 5.83E-01 |
| 7991335 | NM_001150       | ANPEP     | alanyl (membrane) aminopeptidase                                                   | WT and L359V | 0.57 | 0.47 | 0.79 | 0.69 | 1.25E-03 | 1.85E-04 | 4.14E-01 | 5.73E-02 |
| 8126303 | NM_018643       | TREM1     | triggering receptor expressed on myeloid cells 1                                   | WT and L359V | 0.57 | 0.46 | 0.82 | 0.66 | 3.12E-02 | 4.57E-03 | 8.38E-01 | 3.63E-01 |
| 8041422 | NM_170672       | RASGRP3   | RAS guanyl releasing protein 3 (calcium and DAG-regulated)                         | WT and L359V | 0.50 | 0.46 | 0.73 | 0.65 | 1.30E-03 | 4.51E-04 | 3.19E-01 | 7.78E-02 |
| 7952274 | NM_002855       | PVRL1     | poliovirus receptor-related 1 (herpesvirus entry mediator C)                       | WT and L359V | 0.61 | 0.46 | 0.91 | 0.72 | 4.58E-03 | 2.73E-04 | 8.77E-01 | 1.57E-01 |
| 8171896 | BC020611        | CXorf21   | chromosome X open reading frame 21                                                 | WT and L359V | 0.56 | 0.46 | 0.75 | 0.75 | 1.79E-02 | 2.76E-03 | 7.15E-01 | 6.53E-01 |
| 7921677 | NM_016382       | CD244     | CD244 molecule, natural killer cell receptor 2B4                                   | WT and L359V | 0.50 | 0.45 | 0.67 | 0.68 | 8.36E-04 | 2.75E-04 | 8.10E-02 | 8.32E-02 |
| 8080781 | NM_017771       | PXK       | PX domain containing serine                                                        | WT and L359V | 0.50 | 0.45 | 0.85 | 0.74 | 7.03E-04 | 2.54E-04 | 7.97E-01 | 2.15E-01 |
| 8038861 | NM_001245       | SIGLEC6   | sialic acid binding Ig-like lectin 6                                               | WT and L359V | 0.47 | 0.45 | 0.66 | 0.55 | 1.45E-02 | 7.42E-03 | 5.66E-01 | 1.69E-01 |
| 8142452 | NM_012252       | TFEC      | transcription factor EC                                                            | WT and L359V | 0.63 | 0.45 | 0.78 | 0.73 | 1.03E-02 | 3.73E-04 | 5.21E-01 | 2.24E-01 |
| 7965565 | NM_032147       | USP44     | ubiquitin specific peptidase 44                                                    | WT and L359V | 0.56 | 0.42 | 0.92 | 0.77 | 2.12E-03 | 1.85E-04 | 8.87E-01 | 3.37E-01 |
| 8094240 | NM_001775       | CD38      | CD38 molecule                                                                      | WT and L359V | 0.62 | 0.42 | 0.96 | 0.79 | 1.32E-02 | 3.66E-04 | 9.59E-01 | 6.15E-01 |
| 8076894 | NM_015166       | MLC1      | megalencephalic leukoencephalopathy with subcortical cysts 1                       | WT and L359V | 0.50 | 0.42 | 0.80 | 0.69 | 5.75E-03 | 1.12E-03 | 8.01E-01 | 3.40E-01 |
| 7973108 | ENST00000258817 | LOC643332 | similar to Nonsecretory ribonuclease precursor (Ribonuclease US) (Eosinophil-deriv | WT and L359V | 0.47 | 0.41 | 0.93 | 0.66 | 4.37E-03 | 1.20E-03 | 9.38E-01 | 2.74E-01 |
| 8025103 | NM_001974       | EMR1      | egf-like module containing, mucin-like, hormone receptor-like 1                    | WT and L359V | 0.51 | 0.41 | 0.68 | 0.65 | 3.42E-03 | 4.51E-04 | 2.44E-01 | 1.26E-01 |
| 8121277 | NM_001624       | AIM1      | absent in melanoma 1                                                               | WT and L359V | 0.59 | 0.41 | 0.75 | 0.71 | 2.36E-02 | 1.07E-03 | 6.76E-01 | 4.40E-01 |
| 7903980 | BC017973        | C1orf162  | chromosome 1 open reading frame 162                                                | WT and L359V | 0.68 | 0.39 | 0.72 | 0.69 | 7.56E-03 | 4.20E-05 | 9.72E-02 | 5.50E-02 |
| 8080964 | BC127733        | GLT8D4    | glycosyltransferase 8 domain containing 4                                          | WT and L359V | 0.55 | 0.39 | 0.84 | 0.70 | 2.19E-03 | 1.04E-04 | 7.79E-01 | 1.25E-01 |
| 8107909 | NM_003059       | SLC22A4   | solute carrier family 22 (organic cation                                           | WT and L359V | 0.40 | 0.38 | 0.54 | 0.56 | 2.38E-03 | 1.25E-03 | 1.06E-01 | 1.24E-01 |
| 8140468 | NM_017439       | PION      | pigeon homolog (Drosophila)                                                        | WT and L359V | 0.37 | 0.36 | 0.49 | 0.56 | 5.68E-03 | 3.37E-03 | 1.52E-01 | 2.63E-01 |
| 7904303 | NM_004258       | IGSF2     | immunoglobulin superfamily, member 2                                               | WT and L359V | 0.45 | 0.36 | 0.64 | 0.60 | 1.22E-02 | 2.57E-03 | 5.30E-01 | 3.05E-01 |
| 8001007 | NM_002773       | PRSS8     | protease, serine, 8                                                                | WT and L359V | 0.43 | 0.36 | 0.66 | 0.61 | 4.46E-02 | 1.33E-02 | 8.01E-01 | 6.93E-01 |
| 8036004 | NM_004364       | CEBPA     | CCAAT                                                                              | WT and L359V | 0.54 | 0.36 | 0.82 | 0.64 | 5.06E-03 | 1.96E-04 | 7.97E-01 | 1.17E-01 |
| 8031293 | NM_014511       | KIR2DL3   | killer cell immunoglobulin-like receptor, two domains, long cytoplasmic tail, 3    | WT and L359V | 0.39 | 0.35 | 0.58 | 0.52 | 1.31E-02 | 4.91E-03 | 5.02E-01 | 2.70E-01 |
| 8143471 | NM_013252       | CLECSA    | C-type lectin domain family 5, member A                                            | WT and L359V | 0.34 | 0.32 | 0.53 | 0.53 | 1.37E-02 | 7.30E-03 | 4.95E-01 | 4.02E-01 |
| 7968637 | NM_003914       | CCNA1     | cyclin A1                                                                          | WT and L359V | 0.43 | 0.32 | 0.56 | 0.52 | 3.46E-03 | 3.96E-04 | 1.21E-01 | 6.59E-02 |
| 7978351 | NM_001911       | CTSG      | cathepsin G                                                                        | WT and L359V | 0.45 | 0.29 | 0.71 | 0.66 | 3.73E-03 | 2.64E-04 | 5.47E-01 | 3.05E-01 |
| 8112428 | NM_005582       | CD180     | CD180 molecule                                                                     | WT and L359V | 0.32 | 0.29 | 0.43 | 0.54 | 2.08E-03 | 8.42E-04 | 6.16E-02 | 1.74E-01 |
| 8016932 | NM_000250       | MPO       | myeloperoxidase                                                                    | WT and L359V | 0.52 | 0.28 | 0.85 | 0.67 | 4.20E-03 | 6.68E-05 | 8.25E-01 | 1.73E-01 |
| 7934898 | NM_144590       | ANKRD22   | ankyrin repeat domain 22                                                           | WT and L359V | 0.43 | 0.19 | 0.66 | 0.55 | 1.38E-02 | 2.63E-04 | 6.69E-01 | 2.61E-01 |
| 8081537 | NM_016388       | TRAT1     | T cell receptor associated transmembrane adaptor 1                                 | WT and T354M | 8.54 | 1.41 | 5.44 | 2.52 | 6.34E-05 | 2.72E-01 | 1.85E-03 | 5.50E-02 |
| 7902808 | ENST00000370548 | HS2ST1    | heparan sulfate 2-O-sulfotransferase 1                                             | WT and T354M | 3.73 | 1.28 | 2.38 | 1.57 | 4.11E-04 | 3.32E-01 | 2.36E-02 | 3.05E-01 |
| 8163000 | ---             | ---       | ---                                                                                | WT and T354M | 3.89 | 1.19 | 2.82 | 1.72 | 9.46E-04 | 6.08E-01 | 2.36E-02 | 3.05E-01 |
| 8005814 | NM_016231       | NLK       | nemo-like kinase                                                                   | WT and T354M | 1.85 | 1.16 | 1.39 | 1.20 | 2.79E-04 | 1.69E-01 | 4.79E-02 | 3.67E-01 |
| 8167360 | NM_002049       | GATA1     | GATA binding protein 1 (globin transcription factor 1)                             | WT and T354M | 3.30 | 1.11 | 1.77 | 1.48 | 3.30E-05 | 5.19E-01 | 1.25E-02 | 7.01E-02 |
| 7948455 | NM_152852       | MS4A6A    | membrane-spanning 4-domains, subfamily A, member 6A                                | WT and T354M | 1.83 | 0.95 | 2.04 | 1.33 | 4.47E-03 | 8.27E-01 | 1.24E-02 | 4.04E-01 |
| 7922689 | NM_002065       | GLUL      | glutamate-ammonia ligase (glutamine synthetase)                                    | WT and T354M | 1.58 | 0.94 | 1.45 | 1.20 | 1.32E-03 | 5.78E-01 | 2.36E-02 | 3.40E-01 |
| 7994826 | NM_002209       | ITGAL     | integrin, alpha L (antigen CD11A (p180), lymphocyte function-associated antigen 1; | WT and T354M | 1.67 | 0.86 | 1.44 | 1.17 | 8.36E-04 | 1.53E-01 | 3.17E-02 | 5.05E-01 |
| 7976080 | NM_003608       | GPR65     | G protein-coupled receptor 65                                                      | WT and T354M | 2.59 | 0.85 | 2.15 | 1.41 | 4.79E-04 | 4.17E-01 | 1.24E-02 | 3.05E-01 |
| 8107044 | NM_022350       | ERAP2     | endoplasmic reticulum aminopeptidase 2                                             | WT and T354M | 0.63 | 0.79 | 0.57 | 0.77 | 5.75E-03 | 8.44E-02 | 1.25E-02 | 2.83E-01 |
| 7988050 | NM_201631       | TGM5      | transglutaminase 5                                                                 | WT and T354M | 0.46 | 0.72 | 0.54 | 0.69 | 1.99E-03 | 8.86E-02 | 4.10E-02 | 2.70E-01 |
| 7908409 | NM_002923       | RGS2      | regulator of G-protein signaling 2, 24kDa                                          | WT only      | 2.52 | 2.23 | 1.36 | 1.42 | 4.23E-02 | 5.68E-02 | 8.64E-01 | 1.00E+00 |
| 7954293 | NM_000921       | PDE3A     | phosphodiesterase 3A, cGMP-inhibited                                               | WT only      | 2.13 | 1.75 | 1.01 | 1.26 | 4.98E-02 | 1.15E-01 | 9.97E-01 | 1.00E+00 |
| 8029907 | NM_001736       | C5AR1     | complement component 5a receptor 1                                                 | WT only      | 2.19 | 1.68 | 1.94 | 1.69 | 1.74E-02 | 7.63E-02 | 2.01E-01 | 3.31E-01 |
| 7933237 | NM_174890       | ANUB1     | AN1, ubiquitin-like, homolog (Xenopus laevis)                                      | WT only      | 2.68 | 1.58 | 1.93 | 1.55 | 5.49E-03 | 1.14E-01 | 2.08E-01 | 5.00E-01 |
| 8069582 | NM_002772       | PRSS7     | protease, serine, 7 (enterokinase)                                                 | WT only      | 1.85 | 1.53 | 1.11 | 1.26 | 2.03E-02 | 7.05E-02 | 9.13E-01 | 9.45E-01 |
| 7908459 | NM_000186       | CFH       | complement factor H                                                                | WT only      | 2.15 | 1.50 | 1.39 | 1.36 | 2.56E-02 | 1.99E-01 | 8.04E-01 | 9.35E-01 |
| 8168531 | NM_032553       | GPR174    | G protein-coupled receptor 174                                                     | WT only      | 2.21 | 1.48 | 1.08 | 1.30 | 1.43E-02 | 1.70E-01 | 9.53E-01 | 1.00E+00 |
| 7980720 | NM_001010854    | TTC7B     | tetratricopeptide repeat domain 7B                                                 | WT only      | 2.58 | 1.48 | 1.34 | 1.38 | 2.39E-03 | 1.04E-01 | 7.50E-01 | 6.34E-01 |
| 7988838 | NM_138792       | LEO1      | Leo1, Paf1                                                                         | WT only      | 1.56 | 1.46 | 1.30 | 1.29 | 3.79E-02 | 5.39E-02 | 7.09E-01 | 6.82E-01 |
| 8083737 | ---             | ---       | ---                                                                                | WT only      | 1.71 | 1.45 | 1.14 | 1.32 | 3.18E-02 | 9.99E-02 | 8.88E-01 | 7.32E-01 |
| 8123739 | NM_016588       | NRN1      | neuritin 1                                                                         | WT only      | 1.54 | 1.44 | 1.26 | 1.29 | 4.45E-02 | 6.46E-02 | 7.79E-01 | 6.88E-01 |
| 7951397 | NM_033292       | CASP1     | caspase 1, apoptosis-related cysteine peptidase (interleukin 1, beta, convertase)  | WT only      | 2.42 | 1.44 | 1.27 | 1.34 | 2.08E-03 | 9.57E-02 | 8.01E-01 | 6.27E-01 |
| 7930894 | NM_005308       | GRK5      | G protein-coupled receptor kinase 5                                                | WT only      | 3.24 | 1.43 | 1.60 | 1.51 | 3.53E-04 | 9.21E-02 | 2.13E-01 | 2.74E-01 |
| 7976333 | NM_015676       | C14orf109 | chromosome 14 open reading frame 109                                               | WT only      | 1.51 | 1.40 | 1.31 | 1.21 | 2.88E-02 | 5.01E-02 | 5.47E-01 | 8.17E-01 |
| 8048976 | ---             | ---       | ---                                                                                | WT only      | 1.52 | 1.40 | 1.05 | 1.19 | 3.18E-02 | 6.21E-02 | 9.51E-01 | 9.56E-01 |
| 8067305 | NM_014258       | SYCP2     | synaptonemal complex protein 2                                                     | WT only      | 2.05 | 1.40 | 1.15 | 1.25 | 1.96E-03 | 5.77E-02 | 8.41E-01 | 6.73E-01 |
| 7967210 | NR_002809       | LOC338799 | hypothetical locus LOC338799                                                       | WT only      | 1.65 | 1.39 | 1.26 | 1.23 | 4.33E-02 | 1.48E-01 | 8.13E-01 | 1.00E+00 |
| 8169519 | NM_019045       | WDR44     | WD repeat domain 44                                                                | WT only      | 1.55 | 1.38 | 0.96 | 1.15 | 2.62E-02 | 6.72E-02 | 9.63E-01 | 1.00E+00 |



|         |              |           |                                                                                       |         |      |      |      |      |          |          |          |          |
|---------|--------------|-----------|---------------------------------------------------------------------------------------|---------|------|------|------|------|----------|----------|----------|----------|
| 8103226 | NM_152680    | TMEM154   | transmembrane protein 154                                                             | WT only | 1.73 | 1.38 | 1.40 | 1.41 | 9.70E-03 | 7.74E-02 | 3.90E-01 | 3.05E-01 |
| 8127360 | ---          |           |                                                                                       | WT only | 1.50 | 1.37 | 1.25 | 1.23 | 3.12E-02 | 6.75E-02 | 7.24E-01 | 7.57E-01 |
| 8051501 | NM_002759    | EIF2AK2   | eukaryotic translation initiation factor 2-alpha kinase 2                             | WT only | 1.42 | 1.37 | 0.98 | 1.15 | 4.93E-02 | 6.04E-02 | 9.81E-01 | 1.00E+00 |
| 8132013 | NM_004067    | CHN2      | chimerin (chimaerin) 2                                                                | WT only | 1.76 | 1.35 | 1.46 | 1.28 | 1.94E-02 | 1.64E-01 | 4.54E-01 | 8.13E-01 |
| 8107518 | ---          |           |                                                                                       | WT only | 1.78 | 1.35 | 1.29 | 1.38 | 3.22E-02 | 2.36E-01 | 8.13E-01 | 6.73E-01 |
| 8142307 | NM_015723    | PNPLA8    | patatin-like phospholipase domain containing 8                                        | WT only | 1.52 | 1.34 | 1.22 | 1.23 | 1.89E-02 | 6.26E-02 | 7.38E-01 | 6.57E-01 |
| 8160559 | NM_014314    | DDX58     | DEAD (Asp-Glu-Ala-Asp) box polypeptide 58                                             | WT only | 1.62 | 1.34 | 1.13 | 1.20 | 1.23E-02 | 7.50E-02 | 8.64E-01 | 8.67E-01 |
| 8050238 | ---          |           |                                                                                       | WT only | 1.44 | 1.34 | 1.00 | 1.10 | 2.62E-02 | 5.02E-02 | 9.97E-01 | 1.00E+00 |
| 8089701 | NM_015642    | ZBTB20    | zinc finger and BTB domain containing 20                                              | WT only | 1.53 | 1.33 | 1.19 | 1.24 | 1.43E-02 | 5.91E-02 | 7.97E-01 | 5.96E-01 |
| 7980998 | NM_001002860 | BTBD7     | BTB (POZ) domain containing 7                                                         | WT only | 1.45 | 1.33 | 1.11 | 1.13 | 3.64E-02 | 7.97E-02 | 8.76E-01 | 1.00E+00 |
| 8075332 | NM_031937    | TBC1D10A  | TBC1 domain family, member 10A                                                        | WT only | 1.59 | 1.32 | 1.23 | 1.21 | 4.09E-02 | 1.82E-01 | 8.19E-01 | 9.89E-01 |
| 8123893 | NM_005906    | MAK       | male germ cell-associated kinase                                                      | WT only | 1.65 | 1.32 | 1.09 | 1.17 | 3.29E-02 | 2.03E-01 | 9.29E-01 | 1.00E+00 |
| 7946275 | NR_003945    | GVIN1     | GTPase, very large interferon inducible 1                                             | WT only | 1.78 | 1.31 | 1.15 | 1.24 | 5.38E-03 | 1.05E-01 | 8.38E-01 | 7.02E-01 |
| 8091260 | NM_173653    | SLC9A9    | solute carrier family 9 (sodium)                                                      | WT only | 1.51 | 1.31 | 1.15 | 1.21 | 2.42E-02 | 1.04E-01 | 8.38E-01 | 8.29E-01 |
| 7969693 | NM_021033    | RAP2A     | RAP2A, member of RAS oncogene family                                                  | WT only | 1.72 | 1.30 | 1.05 | 1.24 | 1.18E-02 | 1.53E-01 | 9.59E-01 | 7.99E-01 |
| 8019622 | NM_145041    | TMEM106A  | transmembrane protein 106A                                                            | WT only | 1.39 | 1.30 | 1.16 | 1.14 | 3.88E-02 | 6.82E-02 | 8.13E-01 | 1.00E+00 |
| 8078147 | NM_000060    | BTB       | biotinidase                                                                           | WT only | 1.63 | 1.30 | 1.11 | 1.22 | 5.06E-03 | 6.26E-02 | 8.56E-01 | 6.10E-01 |
| 7916898 | NM_001114120 | DEPDC1    | DEP domain containing 1                                                               | WT only | 1.47 | 1.30 | 1.18 | 1.27 | 4.09E-02 | 1.29E-01 | 8.23E-01 | 6.07E-01 |
| 8103563 | NM_017631    | DDX60     | DEAD (Asp-Glu-Ala-Asp) box polypeptide 60                                             | WT only | 1.47 | 1.30 | 1.04 | 1.14 | 2.30E-02 | 8.70E-02 | 9.54E-01 | 1.00E+00 |
| 8089203 | NM_020654    | SENP7     | SUMO1                                                                                 | WT only | 1.47 | 1.29 | 1.09 | 1.22 | 1.30E-02 | 5.55E-02 | 8.80E-01 | 5.52E-01 |
| 8094476 | NM_018317    | TBC1D19   | TBC1 domain family, member 19                                                         | WT only | 1.41 | 1.29 | 1.14 | 1.25 | 2.39E-02 | 6.41E-02 | 8.24E-01 | 4.28E-01 |
| 8122365 | NM_020455    | GPR126    | G protein-coupled receptor 126                                                        | WT only | 1.63 | 1.29 | 1.23 | 1.22 | 2.36E-02 | 1.94E-01 | 8.09E-01 | 8.94E-01 |
| 8007483 | NM_145041    | TMEM106A  | transmembrane protein 106A                                                            | WT only | 1.36 | 1.28 | 1.17 | 1.13 | 4.98E-02 | 7.92E-02 | 8.01E-01 | 1.00E+00 |
| 8094719 | NM_018177    | N4BP2     | NEDD4 binding protein 2                                                               | WT only | 1.46 | 1.28 | 0.96 | 1.14 | 1.48E-02 | 6.78E-02 | 9.41E-01 | 9.42E-01 |
| 7980098 | NM_005589    | ALDH6A1   | aldehyde dehydrogenase 6 family, member A1                                            | WT only | 1.43 | 1.28 | 0.98 | 1.11 | 2.52E-02 | 8.57E-02 | 9.79E-01 | 1.00E+00 |
| 8097435 | NM_173487    | C4orf33   | chromosome 4 open reading frame 33                                                    | WT only | 1.52 | 1.28 | 1.10 | 1.17 | 1.49E-02 | 1.03E-01 | 8.77E-01 | 9.13E-01 |
| 8126018 | NM_007271    | STK38     | serine                                                                                | WT only | 1.35 | 1.28 | 1.01 | 1.14 | 3.10E-02 | 5.65E-02 | 9.87E-01 | 8.90E-01 |
| 8113103 | AB020632     | KIAA0825  | KIAA0825 protein                                                                      | WT only | 1.53 | 1.28 | 0.95 | 1.09 | 3.09E-02 | 1.76E-01 | 9.46E-01 | 1.00E+00 |
| 8143209 | NM_174959    | SVOP      | SVOP-like                                                                             | WT only | 1.40 | 1.27 | 1.07 | 1.10 | 3.79E-02 | 1.02E-01 | 9.09E-01 | 1.00E+00 |
| 8010092 | NM_024311    | MFS11     | major facilitator superfamily domain containing 11                                    | WT only | 1.34 | 1.27 | 1.05 | 1.18 | 4.44E-02 | 7.19E-02 | 9.29E-01 | 7.29E-01 |
| 8075322 | NM_001037666 | LOC652968 | hypothetical protein LOC652968                                                        | WT only | 1.48 | 1.27 | 1.39 | 1.22 | 2.41E-02 | 1.28E-01 | 2.64E-01 | 7.01E-01 |
| 7903407 | NM_020978    | AMY2B     | amylase, alpha 2B (pancreatic)                                                        | WT only | 1.34 | 1.27 | 0.99 | 1.12 | 2.74E-02 | 5.05E-02 | 9.93E-01 | 9.68E-01 |
| 8135969 | NM_022742    | CCDC136   | coiled-coil domain containing 136                                                     | WT only | 1.51 | 1.27 | 1.05 | 1.19 | 3.09E-02 | 1.80E-01 | 9.54E-01 | 9.16E-01 |
| 8020090 | NM_020648    | TWSG1     | twisted gastrulation homolog 1 (Drosophila)                                           | WT only | 1.41 | 1.26 | 1.07 | 1.14 | 3.41E-02 | 1.19E-01 | 9.19E-01 | 1.00E+00 |
| 8138596 | NR_002711    | CLK2P     | CDC-like kinase 2, pseudogene                                                         | WT only | 1.42 | 1.26 | 1.16 | 1.19 | 1.25E-02 | 6.01E-02 | 7.50E-01 | 6.00E-01 |
| 7957260 | NM_006851    | GLI1      | GLI pathogenesis-related 1                                                            | WT only | 0.51 | 1.26 | 0.65 | 0.82 | 4.17E-02 | 4.95E-01 | 6.65E-01 | 1.00E+00 |
| 7975066 | NM_004857    | AKAP5     | A kinase (PRKA) anchor protein 5                                                      | WT only | 1.95 | 1.26 | 1.12 | 1.23 | 4.30E-04 | 6.48E-02 | 8.25E-01 | 3.85E-01 |
| 7943424 | NM_001166    | BIRC2     | baculoviral IAP repeat-containing 2                                                   | WT only | 1.45 | 1.26 | 1.10 | 1.12 | 9.76E-03 | 6.24E-02 | 8.59E-01 | 9.77E-01 |
| 8009457 | NM_212472    | PRKAR1A   | protein kinase, cAMP-dependent, regulatory, type I, alpha (tissue specific extinguish | WT only | 1.33 | 1.26 | 1.20 | 1.17 | 4.09E-02 | 7.83E-02 | 6.65E-01 | 7.18E-01 |
| 8085754 | NM_001012410 | SGOL1     | shugoshin-like 1 (S. pombe)                                                           | WT only | 1.33 | 1.25 | 1.01 | 1.12 | 2.56E-02 | 5.26E-02 | 9.93E-01 | 9.79E-01 |
| 7906400 | NM_005531    | IFI16     | interferon, gamma-inducible protein 16                                                | WT only | 0.51 | 1.25 | 0.60 | 0.84 | 1.35E-02 | 3.63E-01 | 2.49E-01 | 1.00E+00 |
| 8096489 | NM_006457    | PDLIM5    | PDZ and LIM domain 5                                                                  | WT only | 1.56 | 1.25 | 1.08 | 1.15 | 7.25E-03 | 1.03E-01 | 8.86E-01 | 9.32E-01 |
| 8167815 | NM_014599    | MAGED2    | melanoma antigen family D, 2                                                          | WT only | 1.41 | 1.25 | 1.09 | 1.07 | 4.06E-02 | 1.47E-01 | 8.92E-01 | 1.00E+00 |
| 8070010 | NM_003895    | SYNJ1     | synaptojanin 1                                                                        | WT only | 1.39 | 1.25 | 1.01 | 1.09 | 2.06E-02 | 8.20E-02 | 9.93E-01 | 1.00E+00 |
| 7908397 | NM_002927    | RGS13     | regulator of G-protein signaling 13                                                   | WT only | 2.67 | 1.25 | 1.04 | 1.27 | 1.47E-04 | 1.55E-01 | 9.59E-01 | 4.81E-01 |
| 7980096 | ---          |           |                                                                                       | WT only | 1.44 | 1.25 | 0.99 | 1.16 | 1.24E-02 | 8.24E-02 | 9.90E-01 | 8.13E-01 |
| 8101260 | NM_058172    | ANTXR2    | anthrax toxin receptor 2                                                              | WT only | 1.69 | 1.24 | 1.41 | 1.23 | 4.04E-03 | 1.34E-01 | 1.72E-01 | 5.78E-01 |
| 8110032 | NM_153607    | C5orf41   | chromosome 5 open reading frame 41                                                    | WT only | 1.35 | 1.24 | 1.04 | 1.14 | 2.25E-02 | 6.31E-02 | 9.36E-01 | 8.08E-01 |
| 8093258 | NM_032263    | IQCG      | IQ motif containing G                                                                 | WT only | 1.35 | 1.24 | 1.01 | 1.13 | 3.54E-02 | 9.99E-02 | 9.93E-01 | 9.92E-01 |
| 8168472 | NM_000052    | ATP7A     | ATPase, Cu++ transporting, alpha polypeptide                                          | WT only | 2.39 | 1.24 | 1.19 | 1.30 | 2.54E-04 | 1.47E-01 | 7.71E-01 | 3.40E-01 |
| 8098326 | ---          |           |                                                                                       | WT only | 1.45 | 1.24 | 1.25 | 1.13 | 2.88E-02 | 1.69E-01 | 6.56E-01 | 1.00E+00 |
| 8149749 | NM_003840    | TNFRSF10D | tumor necrosis factor receptor superfamily, member 10d, decoy with truncated death    | WT only | 1.47 | 1.24 | 1.24 | 1.17 | 4.74E-02 | 2.37E-01 | 7.50E-01 | 1.00E+00 |
| 7923086 | NM_018136    | ASPM      | asp (abnormal spindle) homolog, microcephaly associated (Drosophila)                  | WT only | 1.44 | 1.24 | 1.14 | 1.19 | 8.64E-03 | 6.98E-02 | 8.01E-01 | 5.65E-01 |
| 7990511 | NM_002833    | PTPN9     | protein tyrosine phosphatase, non-receptor type 9                                     | WT only | 1.52 | 1.24 | 1.11 | 1.16 | 4.52E-03 | 6.95E-02 | 8.34E-01 | 7.22E-01 |
| 8042144 | NM_002908    | REL       | v-rel reticuloendotheliosis viral oncogene homolog (avian)                            | WT only | 1.35 | 1.24 | 1.09 | 1.10 | 1.45E-02 | 5.19E-02 | 8.44E-01 | 1.00E+00 |
| 7927955 | NM_015634    | KIAA1279  | KIAA1279                                                                              | WT only | 1.35 | 1.23 | 1.01 | 1.12 | 3.41E-02 | 1.07E-01 | 9.93E-01 | 1.00E+00 |
| 8113064 | NM_198273    | LYSMD3    | LysM, putative peptidoglycan-binding, domain containing 3                             | WT only | 1.54 | 1.23 | 1.14 | 1.21 | 6.89E-03 | 1.13E-01 | 8.21E-01 | 5.87E-01 |
| 7972055 | NM_138444    | KCTD12    | potassium channel tetramerisation domain containing 12                                | WT only | 0.72 | 1.23 | 0.81 | 0.87 | 3.13E-02 | 1.33E-01 | 6.12E-01 | 9.05E-01 |
| 8111533 | NM_001007527 | LMBRD2    | LMBR1 domain containing 2                                                             | WT only | 1.37 | 1.23 | 1.03 | 1.18 | 1.90E-02 | 8.86E-02 | 9.52E-01 | 5.96E-01 |
| 7992865 | NR_002169    | OR1F2P    | olfactory receptor, family 1, subfamily F, member 2                                   | WT only | 1.61 | 1.22 | 1.35 | 1.25 | 1.23E-02 | 2.26E-01 | 4.22E-01 | 6.27E-01 |
| 8128394 | NM_032870    | SFRS18    | splicing factor, arginine                                                             | WT only | 1.33 | 1.22 | 1.11 | 1.22 | 2.52E-02 | 8.22E-02 | 8.34E-01 | 3.63E-01 |
| 8143341 | NM_030647    | JHDM1D    | jumonji C domain containing histone demethylase 1 homolog D (S. cerevisiae)           | WT only | 1.30 | 1.22 | 1.11 | 1.14 | 4.83E-02 | 1.04E-01 | 8.36E-01 | 8.88E-01 |
| 8015759 | NM_006373    | VAT1      | vesicle amine transport protein 1 homolog (T. californica)                            | WT only | 1.31 | 1.22 | 1.32 | 1.16 | 2.91E-02 | 7.77E-02 | 1.53E-01 | 6.86E-01 |
| 7901788 | NM_001134673 | NFIA      | nuclear factor I                                                                      | WT only | 1.86 | 1.22 | 1.52 | 1.33 | 1.23E-02 | 3.80E-01 | 3.50E-01 | 6.40E-01 |
| 8101411 | NM_194282    | LIN54     | lin-54 homolog (C. elegans)                                                           | WT only | 1.26 | 1.22 | 1.07 | 1.11 | 4.99E-02 | 7.10E-02 | 8.85E-01 | 9.63E-01 |

|         |              |               |                                                                                     |         |      |      |      |      |          |          |          |          |
|---------|--------------|---------------|-------------------------------------------------------------------------------------|---------|------|------|------|------|----------|----------|----------|----------|
| 8090133 | NM_022757    | CCDC14        | coiled-coil domain containing 14                                                    | WT only | 1.35 | 1.22 | 1.05 | 1.17 | 2.54E-02 | 1.04E-01 | 9.22E-01 | 6.61E-01 |
| 8117476 | NM_006994    | BTN3A3        | butyrophilin, subfamily 3, member A3                                                | WT only | 1.66 | 1.22 | 1.15 | 1.19 | 3.06E-03 | 1.38E-01 | 8.06E-01 | 6.55E-01 |
| 7938485 | NM_014632    | MICAL2        | microtubule associated monooxygenase, calponin and LIM domain containing 2          | WT only | 0.71 | 1.22 | 1.04 | 0.93 | 1.27E-02 | 9.62E-02 | 9.44E-01 | 1.00E+00 |
| 7926609 | NM_005180    | BMI1          | BMI1 polycomb ring finger oncogene                                                  | WT only | 1.30 | 1.22 | 0.99 | 1.13 | 2.52E-02 | 6.72E-02 | 9.94E-01 | 8.36E-01 |
| 7909455 | NM_025228    | TRAF3IP3      | TRAF3 interacting protein 3                                                         | WT only | 1.55 | 1.21 | 1.25 | 1.23 | 3.62E-03 | 1.01E-01 | 3.78E-01 | 3.56E-01 |
| 8154333 | NM_015061    | JMJD2C        | jumonji domain containing 2C                                                        | WT only | 1.26 | 1.21 | 1.02 | 1.13 | 3.80E-02 | 6.23E-02 | 9.71E-01 | 7.53E-01 |
| 8127903 | NM_014895    | KIAA1009      | KIAA1009                                                                            | WT only | 1.60 | 1.21 | 1.12 | 1.24 | 1.70E-02 | 2.78E-01 | 8.74E-01 | 7.09E-01 |
| 8093130 | NM_152617    | RNF168        | ring finger protein 168                                                             | WT only | 1.43 | 1.21 | 1.14 | 1.20 | 3.41E-02 | 2.22E-01 | 8.38E-01 | 8.10E-01 |
| 7983111 | NM_003825    | SNAP23        | synaptosomal-associated protein, 23kDa                                              | WT only | 1.37 | 1.21 | 1.10 | 1.15 | 1.41E-02 | 9.11E-02 | 8.41E-01 | 7.02E-01 |
| 8157890 | NM_006195    | PBX3          | pre-B-cell leukemia homeobox 3                                                      | WT only | 1.27 | 1.21 | 0.97 | 1.05 | 4.74E-02 | 8.52E-02 | 9.55E-01 | 1.00E+00 |
| 7909371 | NM_000573    | CR1           | complement component (3b)                                                           | WT only | 1.87 | 1.21 | 1.36 | 1.22 | 2.78E-03 | 2.49E-01 | 3.86E-01 | 7.47E-01 |
| 7978114 | BC002491     | FAM158A       | family with sequence similarity 158, member A                                       | WT only | 1.28 | 1.21 | 1.10 | 1.11 | 4.98E-02 | 1.04E-01 | 8.45E-01 | 1.00E+00 |
| 8122464 | NM_007124    | UTRN          | utrophin                                                                            | WT only | 1.37 | 1.21 | 1.09 | 1.14 | 6.93E-03 | 5.24E-02 | 8.36E-01 | 6.27E-01 |
| 8098556 | NM_152683    | CCDC111       | coiled-coil domain containing 111                                                   | WT only | 1.48 | 1.21 | 1.10 | 1.20 | 9.53E-03 | 1.49E-01 | 8.55E-01 | 5.86E-01 |
| 8147439 | NM_024613    | PLEKHF2       | pleckstrin homology domain containing, family F (with FYVE domain) member 2         | WT only | 1.48 | 1.20 | 1.24 | 1.19 | 1.67E-02 | 2.00E-01 | 5.91E-01 | 7.44E-01 |
| 8147580 | NM_017890    | VPS13B        | vacuolar protein sorting 13 homolog B (yeast)                                       | WT only | 1.39 | 1.20 | 1.07 | 1.13 | 1.14E-02 | 9.60E-02 | 8.77E-01 | 8.84E-01 |
| 7927215 | NM_000698    | ALOX5         | arachidonate 5-lipoxygenase                                                         | WT only | 1.86 | 1.20 | 1.20 | 1.17 | 1.02E-02 | 4.08E-01 | 8.35E-01 | 1.00E+00 |
| 8053484 | NM_003896    | ST3GAL5       | ST3 beta-galactoside alpha-2,3-sialyltransferase 5                                  | WT only | 1.69 | 1.20 | 1.04 | 1.18 | 5.75E-03 | 2.47E-01 | 9.52E-01 | 8.90E-01 |
| 8166784 | NM_004615    | TSPAN7        | tetraspanin 7                                                                       | WT only | 2.44 | 1.20 | 1.38 | 1.35 | 4.79E-04 | 2.99E-01 | 3.90E-01 | 3.47E-01 |
| 8046792 | NM_080876    | DUSP19        | dual specificity phosphatase 19                                                     | WT only | 1.57 | 1.20 | 1.20 | 1.24 | 4.16E-02 | 4.01E-01 | 8.36E-01 | 8.76E-01 |
| 7947248 | NM_031217    | KIF18A        | kinesin family member 18A                                                           | WT only | 1.35 | 1.20 | 1.06 | 1.18 | 2.29E-02 | 1.21E-01 | 8.95E-01 | 5.97E-01 |
| 8047403 | NM_032977    | CASP10        | caspase 10, apoptosis-related cysteine peptidase                                    | WT only | 1.47 | 1.20 | 1.06 | 1.16 | 6.62E-03 | 1.20E-01 | 8.96E-01 | 7.09E-01 |
| 8096314 | NM_000297    | PKD2          | polycystic kidney disease 2 (autosomal dominant)                                    | WT only | 1.53 | 1.20 | 1.38 | 1.29 | 1.75E-02 | 2.67E-01 | 2.99E-01 | 4.41E-01 |
| 8164343 | NM_001035254 | FAM102A       | family with sequence similarity 102, member A                                       | WT only | 1.43 | 1.20 | 1.14 | 1.10 | 1.09E-02 | 1.31E-01 | 7.97E-01 | 1.00E+00 |
| 8086125 | NM_014831    | LBA1          | lupus brain antigen 1                                                               | WT only | 1.67 | 1.20 | 1.09 | 1.16 | 5.75E-03 | 2.51E-01 | 8.94E-01 | 9.55E-01 |
| 7930380 | NM_016824    | ADD3          | adducin 3 (gamma)                                                                   | WT only | 1.43 | 1.19 | 1.09 | 1.18 | 1.14E-02 | 1.41E-01 | 8.58E-01 | 6.19E-01 |
| 8084912 | NR_003265    | SDHALP2       | succinate dehydrogenase complex, subunit A, flavoprotein pseudogene 2               | WT only | 1.28 | 1.19 | 1.07 | 1.11 | 4.64E-02 | 1.25E-01 | 8.85E-01 | 1.00E+00 |
| 7941179 | NM_005186    | CAPN1         | calpain 1, (mu)                                                                     | WT only | 1.30 | 1.19 | 1.10 | 1.04 | 3.70E-02 | 1.33E-01 | 8.43E-01 | 1.00E+00 |
| 7958466 | NM_001093    | ACACB         | acetyl-Coenzyme A carboxylase beta                                                  | WT only | 1.46 | 1.19 | 1.16 | 1.23 | 1.55E-02 | 2.07E-01 | 8.01E-01 | 5.14E-01 |
| 7982757 | NM_170589    | CASC5         | cancer susceptibility candidate 5                                                   | WT only | 1.30 | 1.19 | 1.03 | 1.12 | 2.74E-02 | 1.05E-01 | 9.58E-01 | 8.88E-01 |
| 8041617 | NM_020744    | MTA3          | metastasis associated 1 family, member 3                                            | WT only | 1.37 | 1.19 | 1.17 | 1.16 | 3.64E-02 | 2.15E-01 | 7.90E-01 | 8.90E-01 |
| 8097811 | AL137273     | DKFZP434I0714 | hypothetical protein DKFZP434I0714                                                  | WT only | 1.43 | 1.19 | 1.10 | 1.21 | 1.56E-02 | 1.91E-01 | 8.64E-01 | 5.75E-01 |
| 8027377 | ---          | ---           | ---                                                                                 | WT only | 1.54 | 1.19 | 1.42 | 1.23 | 1.90E-02 | 3.06E-01 | 2.50E-01 | 7.02E-01 |
| 8082940 | NM_015396    | ARMC8         | armadillo repeat containing 8                                                       | WT only | 1.50 | 1.19 | 1.27 | 1.21 | 2.07E-02 | 2.92E-01 | 6.11E-01 | 7.55E-01 |
| 8129458 | NM_033515    | ARHGAP18      | Rho GTPase activating protein 18                                                    | WT only | 1.74 | 1.19 | 1.10 | 1.18 | 2.23E-03 | 2.19E-01 | 8.64E-01 | 7.45E-01 |
| 7963289 | NM_016293    | BIN2          | bridging integrator 2                                                               | WT only | 1.64 | 1.19 | 1.04 | 1.20 | 1.03E-02 | 3.20E-01 | 9.62E-01 | 8.45E-01 |
| 8157524 | NR_024168    | TLR4          | toll-like receptor 4                                                                | WT only | 1.50 | 1.18 | 1.31 | 1.16 | 2.24E-02 | 3.01E-01 | 4.88E-01 | 9.81E-01 |
| 8036954 | ---          | ---           | ---                                                                                 | WT only | 1.34 | 1.18 | 1.06 | 1.16 | 2.26E-02 | 1.51E-01 | 9.11E-01 | 6.57E-01 |
| 8138922 | NM_015483    | KBTBD2        | kelch repeat and BTB (POZ) domain containing 2                                      | WT only | 1.37 | 1.18 | 1.04 | 1.17 | 4.02E-02 | 2.46E-01 | 9.54E-01 | 8.54E-01 |
| 7951372 | NM_033306    | CASP4         | caspase 4, apoptosis-related cysteine peptidase                                     | WT only | 1.28 | 1.18 | 0.97 | 1.09 | 3.72E-02 | 1.38E-01 | 9.43E-01 | 1.00E+00 |
| 7904695 | NM_004892    | SEC22B        | SEC22 vesicle trafficking protein homolog B (S. cerevisiae)                         | WT only | 1.43 | 1.18 | 1.08 | 1.17 | 1.48E-02 | 2.06E-01 | 8.80E-01 | 7.38E-01 |
| 7972062 | NM_012158    | FBXL3         | F-box and leucine-rich repeat protein 3                                             | WT only | 1.32 | 1.18 | 1.06 | 1.13 | 4.18E-02 | 2.04E-01 | 9.18E-01 | 9.35E-01 |
| 7980080 | NM_001249    | ENTPD5        | ectonucleoside triphosphate diphosphohydrolase 5                                    | WT only | 1.42 | 1.18 | 1.19 | 1.18 | 3.16E-02 | 2.93E-01 | 7.85E-01 | 8.17E-01 |
| 7900009 | NM_017629    | EIF2C4        | eukaryotic translation initiation factor 2C, 4                                      | WT only | 1.35 | 1.17 | 1.20 | 1.21 | 4.70E-02 | 2.58E-01 | 7.13E-01 | 5.97E-01 |
| 8073062 | NM_004900    | APOBEC3B      | apolipoprotein B mRNA editing enzyme, catalytic polypeptide-like 3B                 | WT only | 1.37 | 1.17 | 1.04 | 1.14 | 4.83E-02 | 2.88E-01 | 9.55E-01 | 1.00E+00 |
| 8063211 | NM_181659    | NCOA3         | nuclear receptor coactivator 3                                                      | WT only | 1.35 | 1.17 | 1.14 | 1.13 | 1.34E-02 | 1.29E-01 | 7.51E-01 | 8.11E-01 |
| 7902166 | NM_020948    | MIER1         | mesoderm induction early response 1 homolog (Xenopus laevis)                        | WT only | 1.43 | 1.17 | 1.07 | 1.16 | 1.31E-02 | 2.07E-01 | 8.88E-01 | 7.48E-01 |
| 8085081 | NM_016302    | CRBN          | cereblon                                                                            | WT only | 1.37 | 1.17 | 0.97 | 1.14 | 1.09E-02 | 1.42E-01 | 9.54E-01 | 7.40E-01 |
| 8089112 | NM_182909    | FILIP1L       | filamin A interacting protein 1-like                                                | WT only | 1.67 | 1.17 | 1.11 | 1.18 | 2.16E-02 | 4.83E-01 | 8.93E-01 | 1.00E+00 |
| 7940153 | NM_022074    | FAM111A       | family with sequence similarity 111, member A                                       | WT only | 1.38 | 1.17 | 1.03 | 1.14 | 7.41E-03 | 1.26E-01 | 9.46E-01 | 6.96E-01 |
| 8056572 | NM_020675    | SPC25         | SPC25, NDC80 kinetochore complex component, homolog (S. cerevisiae)                 | WT only | 1.32 | 1.16 | 1.13 | 1.12 | 1.68E-02 | 1.43E-01 | 7.74E-01 | 8.45E-01 |
| 8107532 | NM_000414    | HSD17B4       | hydroxysteroid (17-beta) dehydrogenase 4                                            | WT only | 1.45 | 1.16 | 1.08 | 1.14 | 8.71E-03 | 2.14E-01 | 8.80E-01 | 8.78E-01 |
| 7898556 | NM_001040125 | PQLC2         | PQ loop repeat containing 2                                                         | WT only | 0.75 | 1.16 | 0.88 | 0.93 | 4.95E-02 | 2.78E-01 | 8.25E-01 | 1.00E+00 |
| 8173766 | NM_153252    | BRWD3         | bromodomain and WD repeat domain containing 3                                       | WT only | 1.31 | 1.16 | 1.06 | 1.07 | 1.81E-02 | 1.41E-01 | 8.86E-01 | 1.00E+00 |
| 8175177 | NM_018388    | MBNL3         | muscleblind-like 3 (Drosophila)                                                     | WT only | 1.34 | 1.16 | 1.03 | 1.08 | 2.23E-02 | 2.00E-01 | 9.58E-01 | 1.00E+00 |
| 8017704 | AK056627     | FLJ32065      | hypothetical protein FLJ32065                                                       | WT only | 1.66 | 1.16 | 1.24 | 1.25 | 2.88E-02 | 5.33E-01 | 8.13E-01 | 8.78E-01 |
| 7988753 | NM_032802    | SPPL2A        | signal peptide peptidase-like 2A                                                    | WT only | 1.38 | 1.16 | 1.02 | 1.12 | 1.64E-02 | 2.32E-01 | 9.82E-01 | 1.00E+00 |
| 8135422 | NM_001008407 | BCAP29        | B-cell receptor-associated protein 29                                               | WT only | 1.36 | 1.15 | 0.98 | 1.11 | 2.58E-02 | 2.72E-01 | 9.76E-01 | 1.00E+00 |
| 8116874 | NM_001040274 | SYCP2L        | synaptonemal complex protein 2-like                                                 | WT only | 1.54 | 1.15 | 1.32 | 1.28 | 3.10E-03 | 2.36E-01 | 1.70E-01 | 2.05E-01 |
| 7963212 | NM_000617    | SLC11A2       | solute carrier family 11 (proton-coupled divalent metal ion transporters), member 2 | WT only | 1.57 | 1.15 | 1.29 | 1.19 | 1.54E-02 | 4.43E-01 | 5.72E-01 | 8.90E-01 |
| 8094251 | AK096972     | FLJ39653      | hypothetical FLJ39653                                                               | WT only | 1.30 | 1.14 | 1.05 | 1.10 | 2.88E-02 | 2.27E-01 | 9.26E-01 | 1.00E+00 |
| 8072757 | NM_000395    | CSF2RB        | colony stimulating factor 2 receptor, beta, low-affinity (granulocyte-macrophage)   | WT only | 1.61 | 1.14 | 1.36 | 1.10 | 7.96E-03 | 4.25E-01 | 2.98E-01 | 1.00E+00 |
| 7917707 | NM_005665    | EVIS          | ecotropic viral integration site 5                                                  | WT only | 1.84 | 1.14 | 1.40 | 1.26 | 1.82E-03 | 4.04E-01 | 1.92E-01 | 4.56E-01 |
| 8059111 | NM_005689    | ABCB6         | ATP-binding cassette, sub-family B (MDR)                                            | WT only | 1.35 | 1.14 | 1.25 | 1.18 | 2.52E-02 | 2.97E-01 | 4.14E-01 | 6.27E-01 |
| 8052269 | NM_001135597 | CCDC88A       | coiled-coil domain containing 88A                                                   | WT only | 1.48 | 1.14 | 1.24 | 1.23 | 2.76E-02 | 4.57E-01 | 7.21E-01 | 6.73E-01 |

|         |              |              |                                                                                      |         |      |      |      |      |          |          |          |          |
|---------|--------------|--------------|--------------------------------------------------------------------------------------|---------|------|------|------|------|----------|----------|----------|----------|
| 8093643 | NM_176801    | ADD1         | adducin 1 (alpha)                                                                    | WT only | 1.29 | 1.14 | 1.10 | 1.09 | 4.95E-02 | 2.86E-01 | 8.39E-01 | 1.00E+00 |
| 8156688 | NM_014290    | TDRD7        | tudor domain containing 7                                                            | WT only | 1.30 | 1.14 | 0.94 | 1.07 | 4.18E-02 | 2.80E-01 | 9.00E-01 | 1.00E+00 |
| 8119052 | NM_173676    | PNPLA1       | patatin-like phospholipase domain containing 1                                       | WT only | 1.87 | 1.14 | 1.47 | 1.24 | 1.49E-03 | 3.99E-01 | 9.66E-02 | 4.98E-01 |
| 8150714 | NM_052937    | PCMTD1       | protein-L-isoaspartate (D-aspartate) O-methyltransferase domain containing 1         | WT only | 1.39 | 1.14 | 1.13 | 1.27 | 2.62E-02 | 3.56E-01 | 8.27E-01 | 3.35E-01 |
| 8102076 | NM_001813    | CENPE        | centromere protein E, 312kDa                                                         | WT only | 1.42 | 1.14 | 1.14 | 1.22 | 7.26E-03 | 2.52E-01 | 7.77E-01 | 3.07E-01 |
| 7984276 | NM_004727    | SLC24A1      | solute carrier family 24 (sodium)                                                    | WT only | 1.85 | 1.13 | 1.24 | 1.19 | 5.06E-03 | 5.25E-01 | 7.51E-01 | 9.45E-01 |
| 7922353 | NM_178527    | SLC9A11      | solute carrier family 9, member 11                                                   | WT only | 1.54 | 1.13 | 1.17 | 1.14 | 1.73E-02 | 4.70E-01 | 8.20E-01 | 1.00E+00 |
| 8083709 | NM_005496    | SMC4         | structural maintenance of chromosomes 4                                              | WT only | 1.29 | 1.13 | 1.10 | 1.16 | 2.62E-02 | 2.46E-01 | 8.30E-01 | 5.81E-01 |
| 7908978 | NM_014827    | ZC3H11A      | zinc finger CCCH-type containing 11A                                                 | WT only | 1.52 | 1.13 | 1.14 | 1.25 | 9.91E-03 | 4.13E-01 | 8.23E-01 | 4.39E-01 |
| 8083214 | NM_004267    | CHST2        | carbohydrate (N-acetylglucosamine-6-O) sulfotransferase 2                            | WT only | 1.37 | 1.13 | 1.24 | 1.15 | 2.64E-02 | 3.71E-01 | 4.88E-01 | 8.38E-01 |
| 8106784 | NM_002890    | RASA1        | RAS p21 protein activator (GTPase activating protein) 1                              | WT only | 1.32 | 1.13 | 1.07 | 1.16 | 1.82E-02 | 2.62E-01 | 8.77E-01 | 6.07E-01 |
| 8089082 | NM_080927    | DCBLD2       | discoidin, CUB and LCCL domain containing 2                                          | WT only | 1.51 | 1.13 | 1.14 | 1.11 | 1.23E-02 | 4.43E-01 | 8.23E-01 | 1.00E+00 |
| 8156706 | NM_003275    | TMOD1        | tropomodulin 1                                                                       | WT only | 1.35 | 1.12 | 1.15 | 1.15 | 3.49E-02 | 3.94E-01 | 8.06E-01 | 8.90E-01 |
| 8145624 | NM_001440    | EXTL3        | exostosins (multiple)-like 3                                                         | WT only | 1.40 | 1.12 | 1.03 | 1.08 | 1.75E-02 | 3.84E-01 | 9.67E-01 | 1.00E+00 |
| 7908178 | NM_017673    | C1orf26      | chromosome 1 open reading frame 26                                                   | WT only | 1.57 | 1.12 | 1.22 | 1.19 | 4.09E-02 | 6.26E-01 | 8.20E-01 | 1.00E+00 |
| 8057954 | AY358249     | C2orf66      | chromosome 2 open reading frame 66                                                   | WT only | 2.11 | 1.12 | 0.97 | 1.18 | 5.95E-03 | 6.66E-01 | 9.81E-01 | 1.00E+00 |
| 7955217 | NM_023071    | SPATS2       | spermatogenesis associated, serine-rich 2                                            | WT only | 1.52 | 1.12 | 1.04 | 1.12 | 1.22E-02 | 4.65E-01 | 9.55E-01 | 1.00E+00 |
| 8109697 | NM_004060    | CCNG1        | cyclin G1                                                                            | WT only | 1.31 | 1.12 | 1.14 | 1.17 | 2.58E-02 | 3.05E-01 | 7.50E-01 | 5.88E-01 |
| 8175420 | NM_002139    | RBMX         | RNA binding motif protein, X-linked                                                  | WT only | 1.29 | 1.12 | 1.12 | 1.16 | 3.22E-02 | 3.07E-01 | 8.13E-01 | 6.17E-01 |
| 8108861 | NM_030571    | NDFIP1       | Nedd4 family interacting protein 1                                                   | WT only | 1.57 | 1.12 | 1.30 | 1.21 | 9.14E-03 | 5.01E-01 | 4.33E-01 | 6.55E-01 |
| 8145636 | NM_024567    | HMBOX1       | homeobox containing 1                                                                | WT only | 1.38 | 1.12 | 1.08 | 1.11 | 2.42E-02 | 4.39E-01 | 8.86E-01 | 1.00E+00 |
| 7984517 | NM_015554    | GLCE         | glucuronic acid epimerase                                                            | WT only | 1.32 | 1.11 | 0.99 | 1.12 | 4.23E-02 | 4.29E-01 | 9.91E-01 | 9.88E-01 |
| 8105487 | NM_138453    | RAB3C        | RAB3C, member RAS oncogene family                                                    | WT only | 1.79 | 1.11 | 1.31 | 1.22 | 3.05E-02 | 7.21E-01 | 7.98E-01 | 1.00E+00 |
| 8161774 | NM_017662    | TRPM6        | transient receptor potential cation channel, subfamily M, member 6                   | WT only | 1.78 | 1.11 | 1.40 | 1.23 | 1.24E-02 | 6.52E-01 | 4.84E-01 | 8.84E-01 |
| 8127109 | NM_016513    | ICK          | intestinal cell (MAK-like) kinase                                                    | WT only | 1.70 | 1.11 | 1.23 | 1.23 | 7.35E-03 | 5.85E-01 | 7.38E-01 | 6.95E-01 |
| 7928019 | NM_033500    | HK1          | hexokinase 1                                                                         | WT only | 1.91 | 1.11 | 1.22 | 1.22 | 1.24E-02 | 7.08E-01 | 8.36E-01 | 1.00E+00 |
| 7979307 | NM_014750    | DLGAP5       | discs, large (Drosophila) homolog-associated protein 5                               | WT only | 1.35 | 1.10 | 1.10 | 1.14 | 1.48E-02 | 3.82E-01 | 8.36E-01 | 7.36E-01 |
| 7944991 | NM_152713    | STT3A        | STT3, subunit of the oligosaccharyltransferase complex, homolog A (S. cerevisiae)    | WT only | 1.27 | 1.10 | 1.14 | 1.10 | 3.21E-02 | 3.56E-01 | 7.38E-01 | 9.89E-01 |
| 7976336 | NM_175748    | UBR7         | ubiquitin protein ligase E3 component n-recogin 7 (putative)                         | WT only | 1.35 | 1.10 | 1.02 | 1.11 | 3.56E-02 | 4.91E-01 | 9.81E-01 | 1.00E+00 |
| 8088745 | NM_015123    | FRMD4B       | FERM domain containing 4B                                                            | WT only | 1.51 | 1.10 | 0.92 | 1.13 | 3.56E-02 | 6.39E-01 | 9.16E-01 | 1.00E+00 |
| 8108127 | NM_001745    | CAMLG        | calcium modulating ligand                                                            | WT only | 1.48 | 1.10 | 1.25 | 1.27 | 3.94E-02 | 6.26E-01 | 7.38E-01 | 6.27E-01 |
| 8083941 | NM_018098    | ECT2         | epithelial cell transforming sequence 2 oncogene                                     | WT only | 1.30 | 1.10 | 1.05 | 1.12 | 2.91E-02 | 4.07E-01 | 9.06E-01 | 8.90E-01 |
| 8058614 | NM_006055    | LANCL1       | LanC lantibiotic synthetase component C-like 1 (bacterial)                           | WT only | 1.37 | 1.10 | 1.02 | 1.13 | 1.88E-02 | 4.56E-01 | 9.78E-01 | 9.16E-01 |
| 8089478 | NM_001008756 | GCET2        | germinal center expressed transcript 2                                               | WT only | 2.37 | 1.10 | 1.20 | 1.26 | 6.18E-04 | 6.33E-01 | 8.06E-01 | 6.27E-01 |
| 7969003 | NM_021999    | ITM2B        | integral membrane protein 2B                                                         | WT only | 1.29 | 1.10 | 1.13 | 1.14 | 2.06E-02 | 3.68E-01 | 7.52E-01 | 6.32E-01 |
| 8097282 | NM_005841    | SPRY1        | sprouty homolog 1, antagonist of FGF signaling (Drosophila)                          | WT only | 0.75 | 1.10 | 0.87 | 0.94 | 3.77E-02 | 5.05E-01 | 8.01E-01 | 1.00E+00 |
| 8131539 | NM_018374    | TMEM106B     | transmembrane protein 106B                                                           | WT only | 1.36 | 1.10 | 1.12 | 1.15 | 2.54E-02 | 4.90E-01 | 8.23E-01 | 8.29E-01 |
| 7898663 | NM_032409    | PINK1        | PTEN induced putative kinase 1                                                       | WT only | 1.31 | 1.10 | 0.95 | 1.07 | 5.00E-02 | 5.11E-01 | 9.29E-01 | 1.00E+00 |
| 8057990 | NM_153697    | ANKRD44      | ankyrin repeat domain 44                                                             | WT only | 1.28 | 1.10 | 1.04 | 1.12 | 4.98E-02 | 4.63E-01 | 9.31E-01 | 9.26E-01 |
| 7923119 | NM_194314    | ZBTB41       | zinc finger and BTB domain containing 41                                             | WT only | 1.30 | 1.10 | 1.06 | 1.05 | 2.39E-02 | 4.22E-01 | 8.86E-01 | 1.00E+00 |
| 8178552 | NM_021184    | C6orf47      | chromosome 6 open reading frame 47                                                   | WT only | 1.39 | 1.09 | 1.04 | 1.15 | 1.40E-02 | 4.83E-01 | 9.34E-01 | 7.29E-01 |
| 8179808 | NM_021184    | C6orf47      | chromosome 6 open reading frame 47                                                   | WT only | 1.39 | 1.09 | 1.04 | 1.15 | 1.40E-02 | 4.83E-01 | 9.34E-01 | 7.29E-01 |
| 8174051 | NM_000061    | BTK          | Bruton agammaglobulinemia tyrosine kinase                                            | WT only | 1.85 | 1.09 | 1.08 | 1.24 | 9.67E-04 | 5.46E-01 | 8.85E-01 | 4.46E-01 |
| 7946446 | NM_020645    | NRIP3        | nuclear receptor interacting protein 3                                               | WT only | 1.48 | 1.09 | 0.89 | 1.07 | 3.29E-02 | 6.52E-01 | 8.75E-01 | 1.00E+00 |
| 8174474 | NM_022977    | ACSL4        | acyl-CoA synthetase long-chain family member 4                                       | WT only | 1.29 | 1.09 | 1.07 | 1.10 | 5.00E-02 | 5.31E-01 | 8.88E-01 | 1.00E+00 |
| 8040173 | NM_005680    | TAF1B        | TATA box binding protein (TBP)-associated factor, RNA polymerase I, B, 63kDa         | WT only | 1.47 | 1.09 | 1.06 | 1.15 | 2.91E-02 | 6.61E-01 | 9.36E-01 | 1.00E+00 |
| 8165911 | NM_005647    | TBL1X        | transducin (beta)-like 1X-linked                                                     | WT only | 1.49 | 1.09 | 1.09 | 1.16 | 3.41E-02 | 6.89E-01 | 9.09E-01 | 1.00E+00 |
| 8009014 | NM_006852    | TLK2         | tousled-like kinase 2                                                                | WT only | 1.23 | 1.09 | 1.03 | 1.08 | 4.47E-02 | 4.31E-01 | 9.55E-01 | 1.00E+00 |
| 8082688 | NM_015268    | DNAJC13      | DnaJ (Hsp40) homolog, subfamily C, member 13                                         | WT only | 1.28 | 1.08 | 0.96 | 1.09 | 4.90E-02 | 5.28E-01 | 9.43E-01 | 1.00E+00 |
| 8116372 | NM_018434    | RNF130       | ring finger protein 130                                                              | WT only | 1.78 | 1.08 | 1.37 | 1.27 | 1.59E-03 | 6.10E-01 | 1.91E-01 | 3.55E-01 |
| 8124994 | NM_021184    | C6orf47      | chromosome 6 open reading frame 47                                                   | WT only | 1.40 | 1.08 | 1.05 | 1.15 | 1.54E-02 | 5.61E-01 | 9.17E-01 | 7.60E-01 |
| 7954777 | NM_032834    | ALG10        | asparagine-linked glycosylation 10, alpha-1,2-glucosyltransferase homolog (S. pombe) | WT only | 1.30 | 1.08 | 1.07 | 1.11 | 3.73E-02 | 5.41E-01 | 8.81E-01 | 1.00E+00 |
| 8136869 | NM_032982    | CASP2        | caspase 2, apoptosis-related cysteine peptidase                                      | WT only | 1.29 | 1.08 | 1.01 | 1.04 | 2.48E-02 | 4.91E-01 | 9.86E-01 | 1.00E+00 |
| 7899018 | NM_018202    | TMEM57       | transmembrane protein 57                                                             | WT only | 1.33 | 1.08 | 1.18 | 1.16 | 3.74E-02 | 6.00E-01 | 7.26E-01 | 8.17E-01 |
| 7962312 | NM_005164    | ABCD2        | ATP-binding cassette, sub-family D (ALD), member 2                                   | WT only | 1.90 | 1.08 | 1.53 | 1.32 | 9.91E-03 | 7.84E-01 | 3.12E-01 | 6.66E-01 |
| 7906244 | NM_001007792 | NTRK1        | neurotrophic tyrosine kinase, receptor, type 1                                       | WT only | 1.77 | 1.08 | 1.31 | 1.22 | 4.48E-03 | 7.07E-01 | 4.87E-01 | 7.29E-01 |
| 8096079 | ---          | ---          | ---                                                                                  | WT only | 1.53 | 1.08 | 0.99 | 1.14 | 5.31E-03 | 6.15E-01 | 9.84E-01 | 8.90E-01 |
| 7969677 | NM_144778    | MBNL2        | muscleblind-like 2 (Drosophila)                                                      | WT only | 1.54 | 1.07 | 1.33 | 1.18 | 1.47E-03 | 5.13E-01 | 7.35E-02 | 4.16E-01 |
| 7954711 | NM_018169    | C12orf35     | chromosome 12 open reading frame 35                                                  | WT only | 1.46 | 1.07 | 1.04 | 1.12 | 6.13E-03 | 5.85E-01 | 9.36E-01 | 9.26E-01 |
| 8130142 | NM_032832    | LRP11        | low density lipoprotein receptor-related protein 11                                  | WT only | 0.70 | 1.07 | 0.83 | 0.91 | 1.75E-02 | 6.53E-01 | 6.50E-01 | 1.00E+00 |
| 8031566 | XM_001726429 | LOC100132178 | similar to hCG2008275                                                                | WT only | 1.35 | 1.07 | 1.22 | 1.16 | 2.38E-02 | 6.16E-01 | 5.03E-01 | 7.09E-01 |
| 8120961 | NM_138409    | MRAP2        | melanocortin 2 receptor accessory protein 2                                          | WT only | 1.57 | 1.07 | 1.16 | 1.14 | 2.04E-02 | 7.53E-01 | 8.36E-01 | 1.00E+00 |
| 8157233 | NM_032303    | HSDL2        | hydroxysteroid dehydrogenase like 2                                                  | WT only | 1.39 | 1.07 | 1.02 | 1.11 | 1.61E-02 | 6.29E-01 | 9.82E-01 | 1.00E+00 |
| 8124166 | NM_001080480 | MBOAT1       | membrane bound O-acyltransferase domain containing 1                                 | WT only | 1.39 | 1.07 | 1.07 | 1.09 | 1.38E-02 | 6.22E-01 | 8.85E-01 | 1.00E+00 |
| 7954789 | NM_001013620 | ALG10B       | asparagine-linked glycosylation 10, alpha-1,2-glucosyltransferase homolog B (yeast)  | WT only | 1.27 | 1.07 | 1.08 | 1.10 | 4.41E-02 | 5.87E-01 | 8.72E-01 | 1.00E+00 |

|         |                 |           |                                                                                     |         |      |      |      |      |          |          |          |          |
|---------|-----------------|-----------|-------------------------------------------------------------------------------------|---------|------|------|------|------|----------|----------|----------|----------|
| 8132913 | ---             |           |                                                                                     | WT only | 1.30 | 1.07 | 1.20 | 1.14 | 4.26E-02 | 6.49E-01 | 5.76E-01 | 8.38E-01 |
| 8092134 | NM_002662       | PLD1      | phospholipase D1, phosphatidylcholine-specific                                      | WT only | 1.56 | 1.07 | 1.29 | 1.27 | 1.48E-02 | 7.46E-01 | 5.42E-01 | 5.31E-01 |
| 8155849 | NM_000700       | ANXA1     | annexin A1                                                                          | WT only | 1.46 | 1.07 | 1.24 | 1.10 | 1.19E-02 | 6.78E-01 | 5.15E-01 | 1.00E+00 |
| 8012397 | NM_017622       | C17orf59  | chromosome 17 open reading frame 59                                                 | WT only | 1.23 | 1.06 | 1.04 | 1.09 | 4.39E-02 | 5.72E-01 | 9.15E-01 | 1.00E+00 |
| 8056545 | NM_013233       | STK39     | serine threonine kinase 39 (STE20)                                                  | WT only | 1.33 | 1.06 | 1.17 | 1.14 | 1.97E-02 | 6.31E-01 | 6.50E-01 | 7.37E-01 |
| 8155707 | NM_004817       | TJP2      | tight junction protein 2 (zona occludens 2)                                         | WT only | 0.66 | 1.06 | 0.89 | 0.88 | 2.79E-02 | 7.86E-01 | 8.77E-01 | 1.00E+00 |
| 8127841 | NM_015599       | PGM3      | phosphoglucomutase 3                                                                | WT only | 1.68 | 1.06 | 1.29 | 1.21 | 6.26E-03 | 7.69E-01 | 5.15E-01 | 7.46E-01 |
| 8010918 | NM_001128159    | VPS53     | vacuolar protein sorting 53 homolog (S. cerevisiae)                                 | WT only | 0.80 | 1.06 | 0.84 | 0.88 | 4.09E-02 | 6.36E-01 | 4.70E-01 | 6.43E-01 |
| 7984540 | NM_138555       | KIF23     | kinesin family member 23                                                            | WT only | 1.30 | 1.06 | 1.04 | 1.10 | 1.81E-02 | 6.37E-01 | 9.18E-01 | 9.71E-01 |
| 8055624 | NM_014795       | ZEB2      | zinc finger E-box binding homeobox 2                                                | WT only | 1.36 | 1.06 | 1.18 | 1.17 | 1.35E-02 | 6.75E-01 | 6.08E-01 | 5.69E-01 |
| 8146171 | NM_001556       | IKBKB     | inhibitor of kappa light polypeptide gene enhancer in B-cells, kinase beta          | WT only | 1.31 | 1.05 | 1.11 | 1.10 | 3.32E-02 | 7.04E-01 | 8.25E-01 | 1.00E+00 |
| 8161727 | NM_016014       | FAM108B1  | family with sequence similarity 108, member B1                                      | WT only | 1.29 | 1.05 | 1.11 | 1.11 | 4.07E-02 | 7.09E-01 | 8.36E-01 | 9.98E-01 |
| 8091120 | NM_001039547    | GK5       | glycerol kinase 5 (putative)                                                        | WT only | 1.36 | 1.05 | 1.14 | 1.10 | 2.73E-02 | 7.52E-01 | 8.14E-01 | 1.00E+00 |
| 8170360 | AY258285        | FTH1      | ferritin, heavy polypeptide 1                                                       | WT only | 1.26 | 1.05 | 1.06 | 1.11 | 4.90E-02 | 7.11E-01 | 8.98E-01 | 9.32E-01 |
| 8108301 | NM_005733       | KIF20A    | kinesin family member 20A                                                           | WT only | 1.26 | 1.05 | 1.06 | 1.08 | 4.69E-02 | 7.07E-01 | 8.92E-01 | 1.00E+00 |
| 8162236 | NM_006378       | SEMA4D    | sema domain, immunoglobulin domain (Ig), transmembrane domain (TM) and short        | WT only | 1.34 | 1.05 | 1.25 | 1.11 | 1.14E-02 | 6.94E-01 | 2.09E-01 | 8.97E-01 |
| 7961900 | NM_002223       | ITPR2     | inositol 1,4,5-triphosphate receptor, type 2                                        | WT only | 1.50 | 1.05 | 1.32 | 1.20 | 2.71E-02 | 8.35E-01 | 5.02E-01 | 8.62E-01 |
| 7903541 | NM_007269       | STXBP3    | syntaxin binding protein 3                                                          | WT only | 1.26 | 1.05 | 1.03 | 1.06 | 2.91E-02 | 7.05E-01 | 9.54E-01 | 1.00E+00 |
| 8083447 | NM_002563       | P2RY1     | purinergic receptor P2Y, G-protein coupled, 1                                       | WT only | 1.61 | 1.04 | 1.29 | 1.17 | 1.81E-02 | 8.65E-01 | 6.65E-01 | 1.00E+00 |
| 7980580 | NM_000153       | GALC      | galactosylceramidase                                                                | WT only | 2.16 | 1.04 | 1.65 | 1.30 | 7.35E-03 | 9.06E-01 | 2.79E-01 | 8.44E-01 |
| 8145454 | NM_004331       | BNIP3L    | BCL2                                                                                | WT only | 1.39 | 1.04 | 1.36 | 1.16 | 2.73E-02 | 8.19E-01 | 2.09E-01 | 8.84E-01 |
| 7902799 | AK123670        | LOC339524 | hypothetical protein LOC339524                                                      | WT only | 1.95 | 1.04 | 1.40 | 1.22 | 5.66E-04 | 8.16E-01 | 1.24E-01 | 5.16E-01 |
| 7926385 | NM_003473       | STAM      | signal transducing adaptor molecule (SH3 domain and ITAM motif) 1                   | WT only | 1.41 | 1.04 | 1.12 | 1.08 | 3.16E-02 | 8.45E-01 | 8.58E-01 | 1.00E+00 |
| 7905949 | XM_001716780    | LOC648822 | similar to hCG2040565                                                               | WT only | 1.37 | 1.03 | 1.14 | 1.12 | 1.89E-02 | 8.35E-01 | 7.97E-01 | 9.45E-01 |
| 8116835 | NM_145649       | GCNT2     | glucosaminyl (N-acetyl) transferase 2, I-branching enzyme (I blood group)           | WT only | 1.45 | 1.03 | 1.34 | 1.12 | 2.41E-02 | 8.71E-01 | 3.34E-01 | 1.00E+00 |
| 7993776 | NM_030941       | LOC81691  | exonuclease NEF-sp                                                                  | WT only | 1.43 | 1.03 | 1.22 | 1.20 | 2.29E-02 | 8.65E-01 | 6.73E-01 | 6.73E-01 |
| 7932420 | NM_014241       | PTPLA     | protein tyrosine phosphatase-like (proline instead of catalytic arginine), member A | WT only | 1.35 | 1.03 | 1.30 | 1.14 | 1.59E-02 | 8.29E-01 | 1.79E-01 | 7.48E-01 |
| 8063755 | AK304220        | C20orf177 | chromosome 20 open reading frame 177                                                | WT only | 1.62 | 1.03 | 1.05 | 1.11 | 1.74E-03 | 8.69E-01 | 9.29E-01 | 9.94E-01 |
| 8024754 | NM_032607       | CREB3L3   | cAMP responsive element binding protein 3-like 3                                    | WT only | 0.80 | 1.03 | 0.94 | 0.95 | 3.00E-02 | 8.47E-01 | 8.83E-01 | 1.00E+00 |
| 8016044 | NM_000419       | ITGA2B    | integrin, alpha 2b (platelet glycoprotein IIb of IIb                                | WT only | 1.54 | 1.02 | 1.16 | 1.10 | 2.68E-03 | 8.77E-01 | 6.98E-01 | 1.00E+00 |
| 8129783 | NM_003980       | MAP7      | microtubule-associated protein 7                                                    | WT only | 0.71 | 1.02 | 0.88 | 0.91 | 3.18E-02 | 9.18E-01 | 8.37E-01 | 1.00E+00 |
| 8008802 | NM_182569       | GDPD1     | glycerophosphodiester phosphodiesterase domain containing 1                         | WT only | 1.39 | 1.02 | 1.04 | 1.08 | 1.82E-02 | 9.31E-01 | 9.43E-01 | 1.00E+00 |
| 8111210 | ---             |           |                                                                                     | WT only | 1.58 | 1.01 | 1.10 | 1.22 | 4.75E-03 | 9.48E-01 | 8.60E-01 | 5.09E-01 |
| 8162142 | NM_030940       | ISCA1     | iron-sulfur cluster assembly 1 homolog (S. cerevisiae)                              | WT only | 0.70 | 1.01 | 0.91 | 0.91 | 1.50E-02 | 9.50E-01 | 8.60E-01 | 1.00E+00 |
| 7932867 | NM_182755       | ZNF438    | zinc finger protein 438                                                             | WT only | 1.59 | 1.01 | 1.38 | 1.14 | 1.23E-02 | 9.61E-01 | 3.07E-01 | 1.00E+00 |
| 7970949 | NM_005584       | MAB21L1   | mab-21-like 1 (C. elegans)                                                          | WT only | 1.48 | 1.01 | 1.29 | 1.16 | 1.48E-02 | 9.67E-01 | 4.37E-01 | 8.78E-01 |
| 8106418 | NM_001882       | CRHBP     | corticotropin releasing hormone binding protein                                     | WT only | 0.77 | 1.01 | 0.84 | 0.93 | 3.23E-02 | 9.68E-01 | 5.66E-01 | 1.00E+00 |
| 8104570 | BC011524        | FAM105A   | family with sequence similarity 105, member A                                       | WT only | 1.42 | 1.01 | 1.22 | 1.14 | 2.03E-02 | 9.75E-01 | 6.50E-01 | 9.42E-01 |
| 7974473 | NM_017943       | FBXO34    | F-box protein 34                                                                    | WT only | 1.48 | 1.01 | 1.08 | 1.15 | 5.06E-03 | 9.73E-01 | 8.76E-01 | 7.53E-01 |
| 8120943 | NM_016230       | CYB5R4    | cytochrome b5 reductase 4                                                           | WT only | 1.25 | 1.00 | 1.05 | 1.08 | 4.94E-02 | 9.98E-01 | 9.06E-01 | 1.00E+00 |
| 7916808 | NM_015139       | SLC35D1   | solute carrier family 35 (UDP-glucuronic acid                                       | WT only | 1.78 | 1.00 | 1.34 | 1.23 | 1.04E-02 | 9.97E-01 | 5.97E-01 | 8.85E-01 |
| 7988789 | NM_015263       | DMXL2     | Dmx-like 2                                                                          | WT only | 1.29 | 1.00 | 1.21 | 1.10 | 3.09E-02 | 9.81E-01 | 4.49E-01 | 9.92E-01 |
| 8078497 | NM_016300       | ARPP-21   | cyclic AMP-regulated phosphoprotein, 21 kD                                          | WT only | 1.38 | 1.00 | 1.27 | 1.14 | 1.72E-02 | 9.81E-01 | 3.12E-01 | 8.51E-01 |
| 8017599 | NM_000442       | PECAM1    | platelet                                                                            | WT only | 1.45 | 0.99 | 1.35 | 1.13 | 3.14E-02 | 9.82E-01 | 3.65E-01 | 1.00E+00 |
| 8001410 | NM_001012398    | AKTIP     | AKT interacting protein                                                             | WT only | 1.46 | 0.99 | 1.00 | 1.11 | 4.14E-02 | 9.83E-01 | 9.99E-01 | 1.00E+00 |
| 8108873 | NM_015071       | ARHGAP26  | Rho GTPase activating protein 26                                                    | WT only | 0.75 | 0.99 | 0.84 | 0.88 | 1.73E-02 | 9.69E-01 | 5.02E-01 | 8.06E-01 |
| 7979328 | BC109089        | KIAA0831  | KIAA0831                                                                            | WT only | 1.68 | 0.99 | 1.01 | 1.15 | 1.38E-02 | 9.76E-01 | 9.94E-01 | 1.00E+00 |
| 7950671 | NM_080491       | GAB2      | GRB2-associated binding protein 2                                                   | WT only | 1.56 | 0.99 | 1.23 | 1.18 | 1.79E-02 | 9.57E-01 | 7.38E-01 | 9.45E-01 |
| 7925525 | NM_014812       | CEP170    | centrosomal protein 170kDa                                                          | WT only | 1.38 | 0.98 | 1.12 | 1.13 | 9.85E-03 | 8.80E-01 | 8.09E-01 | 8.36E-01 |
| 8094911 | NM_020453       | ATP10D    | ATPase, class V, type 10D                                                           | WT only | 1.80 | 0.98 | 1.19 | 1.08 | 6.59E-03 | 9.36E-01 | 8.16E-01 | 1.00E+00 |
| 8102214 | NM_005443       | PAPSS1    | 3'-phosphoadenosine 5'-phosphosulfate synthase 1                                    | WT only | 1.25 | 0.98 | 1.14 | 1.07 | 4.08E-02 | 8.71E-01 | 7.24E-01 | 1.00E+00 |
| 8096004 | NM_198892       | BMP2K     | BMP2 inducible kinase                                                               | WT only | 1.45 | 0.98 | 0.95 | 1.06 | 4.17E-03 | 8.74E-01 | 8.94E-01 | 1.00E+00 |
| 7909661 | NM_012424       | RPS6KC1   | ribosomal protein S6 kinase, 52kDa, polypeptide 1                                   | WT only | 1.35 | 0.97 | 1.19 | 1.10 | 4.74E-02 | 8.94E-01 | 7.40E-01 | 1.00E+00 |
| 8095773 | NM_003715       | USO1      | USO1 homolog, vesicle docking protein (yeast)                                       | WT only | 1.24 | 0.97 | 1.03 | 1.04 | 4.56E-02 | 7.95E-01 | 9.48E-01 | 1.00E+00 |
| 7985364 | NM_172217       | IL16      | interleukin 16 (lymphocyte chemoattractant factor)                                  | WT only | 0.75 | 0.97 | 0.94 | 0.91 | 2.39E-02 | 8.17E-01 | 8.88E-01 | 1.00E+00 |
| 7985695 | NM_006738       | AKAP13    | A kinase (PRKA) anchor protein 13                                                   | WT only | 1.31 | 0.97 | 0.96 | 1.00 | 3.08E-02 | 8.17E-01 | 9.28E-01 | 1.00E+00 |
| 7938063 | ENST00000316698 | OR52E5    | olfactory receptor, family 52, subfamily E, member 5                                | WT only | 0.76 | 0.97 | 0.84 | 0.87 | 2.47E-02 | 8.06E-01 | 5.21E-01 | 6.66E-01 |
| 8133902 | ---             |           |                                                                                     | WT only | 1.55 | 0.96 | 1.09 | 1.25 | 2.06E-02 | 8.70E-01 | 8.97E-01 | 6.43E-01 |
| 7964701 | NM_002076       | GNS       | glucosamine (N-acetyl)-6-sulfatase                                                  | WT only | 1.70 | 0.96 | 1.16 | 1.15 | 4.10E-03 | 8.41E-01 | 8.11E-01 | 9.45E-01 |
| 8164918 | NM_017585       | SLC2A6    | solute carrier family 2 (facilitated glucose transporter), member 6                 | WT only | 1.38 | 0.96 | 1.11 | 0.97 | 2.91E-02 | 8.03E-01 | 8.45E-01 | 1.00E+00 |
| 7995631 | NM_005611       | RBL2      | retinoblastoma-like 2 (p130)                                                        | WT only | 1.29 | 0.96 | 1.05 | 1.10 | 4.51E-02 | 7.56E-01 | 9.30E-01 | 1.00E+00 |
| 7965322 | NM_000899       | KITLG     | KIT ligand                                                                          | WT only | 1.60 | 0.95 | 1.54 | 1.27 | 1.99E-02 | 8.48E-01 | 1.70E-01 | 6.27E-01 |
| 7983779 | NM_001080534    | UNC13C    | unc-13 homolog C (C. elegans)                                                       | WT only | 0.74 | 0.95 | 0.87 | 0.85 | 3.35E-02 | 7.69E-01 | 8.01E-01 | 7.18E-01 |
| 8077171 | NM_001130921    | RABL2B    | RAB, member of RAS oncogene family-like 2B                                          | WT only | 0.78 | 0.95 | 0.89 | 0.90 | 4.41E-02 | 7.27E-01 | 8.06E-01 | 9.45E-01 |
| 8037123 | NM_002698       | POU2F2    | POU class 2 homeobox 2                                                              | WT only | 1.44 | 0.95 | 0.98 | 1.07 | 4.64E-03 | 6.72E-01 | 9.72E-01 | 1.00E+00 |

|         |              |              |                                                                                        |         |      |      |      |      |          |          |          |          |
|---------|--------------|--------------|----------------------------------------------------------------------------------------|---------|------|------|------|------|----------|----------|----------|----------|
| 8044669 | NM_013412    | RABL2A       | RAB, member of RAS oncogene family-like 2A                                             | WT only | 0.77 | 0.95 | 0.89 | 0.89 | 3.29E-02 | 6.84E-01 | 8.09E-01 | 9.17E-01 |
| 8130422 | NM_173515    | CNKSR3       | CNKSR family member 3                                                                  | WT only | 1.54 | 0.94 | 1.28 | 1.12 | 6.71E-03 | 7.11E-01 | 3.85E-01 | 1.00E+00 |
| 8139033 | NM_001637    | AOAH         | acyloxyacyl hydrolase (neutrophil)                                                     | WT only | 0.73 | 0.94 | 1.02 | 0.94 | 1.40E-02 | 6.42E-01 | 9.81E-01 | 1.00E+00 |
| 8070720 | NM_015259    | ICOSLG       | inducible T-cell co-stimulator ligand                                                  | WT only | 0.59 | 0.94 | 0.78 | 0.82 | 1.89E-03 | 6.91E-01 | 3.70E-01 | 4.76E-01 |
| 8134981 | NM_003302    | TRIP6        | thyroid hormone receptor interactor 6                                                  | WT only | 0.69 | 0.94 | 0.91 | 0.89 | 1.90E-02 | 7.04E-01 | 8.75E-01 | 1.00E+00 |
| 7906433 | ---          | ---          | ---                                                                                    | WT only | 0.70 | 0.94 | 0.77 | 0.83 | 3.22E-02 | 7.25E-01 | 4.70E-01 | 7.09E-01 |
| 8007561 | NM_138387    | G6PC3        | glucose 6 phosphatase, catalytic, 3                                                    | WT only | 0.79 | 0.93 | 0.98 | 0.88 | 4.69E-02 | 5.71E-01 | 9.75E-01 | 8.21E-01 |
| 8036840 | NM_001626    | AKT2         | v-akt murine thymoma viral oncogene homolog 2                                          | WT only | 0.78 | 0.93 | 0.90 | 0.86 | 3.67E-02 | 5.59E-01 | 8.16E-01 | 5.65E-01 |
| 7959249 | ---          | ---          | ---                                                                                    | WT only | 0.69 | 0.93 | 0.88 | 0.88 | 5.06E-03 | 5.43E-01 | 7.66E-01 | 7.46E-01 |
| 7954604 | NM_020782    | KLHDC5       | kelch domain containing 5                                                              | WT only | 0.74 | 0.92 | 0.91 | 0.87 | 2.86E-02 | 5.66E-01 | 8.44E-01 | 8.36E-01 |
| 8152522 | NM_006209    | ENPP2        | ectonucleotide pyrophosphatase                                                         | WT only | 1.45 | 0.92 | 1.01 | 1.04 | 2.41E-02 | 6.36E-01 | 9.86E-01 | 1.00E+00 |
| 8000890 | NM_012248    | SEPHS2       | selenophosphate synthetase 2                                                           | WT only | 1.38 | 0.92 | 1.32 | 1.15 | 9.28E-03 | 4.62E-01 | 1.15E-01 | 6.27E-01 |
| 8163775 | NM_001080497 | MEGF9        | multiple EGF-like-domains 9                                                            | WT only | 1.40 | 0.92 | 1.08 | 1.02 | 3.70E-02 | 6.17E-01 | 8.94E-01 | 1.00E+00 |
| 7907680 | NM_014864    | FAM20B       | family with sequence similarity 20, member B                                           | WT only | 1.33 | 0.92 | 1.06 | 1.05 | 4.39E-02 | 5.49E-01 | 9.13E-01 | 1.00E+00 |
| 8150962 | NM_014729    | TOX          | thymocyte selection-associated high mobility group box                                 | WT only | 2.20 | 0.92 | 1.66 | 1.31 | 1.12E-03 | 6.68E-01 | 6.76E-02 | 4.61E-01 |
| 8171762 | NM_004586    | RPS6KA3      | ribosomal protein S6 kinase, 90kDa, polypeptide 3                                      | WT only | 1.38 | 0.92 | 1.27 | 1.12 | 1.64E-02 | 4.97E-01 | 3.26E-01 | 9.92E-01 |
| 7999433 | ---          | ---          | ---                                                                                    | WT only | 0.71 | 0.91 | 0.89 | 0.88 | 2.16E-02 | 5.63E-01 | 8.36E-01 | 9.63E-01 |
| 8135955 | NM_001219    | CALU         | calumenin                                                                              | WT only | 1.28 | 0.91 | 1.04 | 1.06 | 2.79E-02 | 4.18E-01 | 9.27E-01 | 1.00E+00 |
| 7994292 | NM_181078    | IL21R        | interleukin 21 receptor                                                                | WT only | 0.75 | 0.91 | 0.92 | 0.90 | 3.73E-02 | 5.13E-01 | 8.74E-01 | 1.00E+00 |
| 7929511 | NM_001776    | ENTPD1       | ectonucleoside triphosphatase diphosphohydrolase 1                                     | WT only | 1.53 | 0.91 | 1.49 | 1.17 | 1.92E-02 | 6.17E-01 | 1.44E-01 | 9.63E-01 |
| 8010673 | NM_012140    | SLC25A10     | solute carrier family 25 (mitochondrial carrier; dicarboxylate transporter), member 10 | WT only | 0.74 | 0.91 | 0.88 | 0.86 | 1.90E-02 | 4.49E-01 | 7.93E-01 | 6.34E-01 |
| 8154951 | AY513283     | GLUL         | glutamate-ammonia ligase (glutamine synthetase)                                        | WT only | 1.44 | 0.91 | 1.27 | 1.11 | 7.56E-03 | 4.44E-01 | 2.79E-01 | 9.84E-01 |
| 7958216 | NM_015275    | KIAA1033     | KIAA1033                                                                               | WT only | 0.65 | 0.91 | 0.75 | 0.87 | 5.75E-03 | 4.91E-01 | 2.09E-01 | 8.67E-01 |
| 7921637 | NM_003874    | CD84         | CD84 molecule                                                                          | WT only | 1.30 | 0.91 | 1.04 | 1.01 | 3.59E-02 | 4.29E-01 | 9.32E-01 | 1.00E+00 |
| 8039096 | NM_144687    | NLRP12       | NLR family, pyrin domain containing 12                                                 | WT only | 1.83 | 0.91 | 1.54 | 1.29 | 2.16E-02 | 7.35E-01 | 4.18E-01 | 8.61E-01 |
| 8113664 | ---          | ---          | ---                                                                                    | WT only | 1.50 | 0.90 | 0.87 | 1.04 | 1.06E-02 | 5.04E-01 | 8.11E-01 | 1.00E+00 |
| 7929344 | NM_181745    | GPR120       | G protein-coupled receptor 120                                                         | WT only | 0.32 | 0.90 | 0.40 | 0.59 | 1.24E-02 | 8.53E-01 | 2.00E-01 | 6.28E-01 |
| 8038809 | NM_005601    | NKG7         | natural killer cell group 7 sequence                                                   | WT only | 0.64 | 0.90 | 0.95 | 0.81 | 5.49E-03 | 4.81E-01 | 9.22E-01 | 4.28E-01 |
| 8087833 | NM_001947    | DUSP7        | dual specificity phosphatase 7                                                         | WT only | 0.73 | 0.90 | 0.85 | 0.84 | 9.91E-03 | 3.44E-01 | 5.45E-01 | 3.85E-01 |
| 7897849 | NM_021933    | RP5-1077B9.4 | invasion inhibitory protein 45                                                         | WT only | 0.71 | 0.90 | 0.94 | 0.85 | 1.31E-02 | 4.24E-01 | 9.11E-01 | 6.66E-01 |
| 8015526 | NM_021078    | KAT2A        | K(lysine) acetyltransferase 2A                                                         | WT only | 0.78 | 0.90 | 0.93 | 0.86 | 4.54E-02 | 3.60E-01 | 8.75E-01 | 6.27E-01 |
| 7984317 | ---          | ---          | ---                                                                                    | WT only | 0.79 | 0.90 | 0.87 | 0.88 | 4.29E-02 | 3.38E-01 | 7.41E-01 | 7.60E-01 |
| 8017210 | AK299921     | AP1S2        | adaptor-related protein complex 1, sigma 2 subunit                                     | WT only | 1.55 | 0.90 | 1.38 | 1.19 | 3.50E-03 | 3.88E-01 | 9.60E-02 | 5.69E-01 |
| 8146934 | NM_015364    | LY96         | lymphocyte antigen 96                                                                  | WT only | 1.64 | 0.90 | 1.34 | 1.19 | 4.09E-02 | 6.79E-01 | 7.26E-01 | 1.00E+00 |
| 8058973 | NM_005081    | ZNF142       | zinc finger protein 142                                                                | WT only | 0.77 | 0.89 | 0.88 | 0.87 | 1.94E-02 | 2.59E-01 | 7.26E-01 | 5.77E-01 |
| 8079294 | NM_015004    | EXOSC7       | exosome component 7                                                                    | WT only | 0.78 | 0.89 | 0.95 | 0.95 | 4.90E-02 | 3.31E-01 | 9.27E-01 | 1.00E+00 |
| 8162194 | NM_178432    | CCRK         | cell cycle related kinase                                                              | WT only | 0.80 | 0.89 | 0.93 | 0.89 | 4.98E-02 | 2.48E-01 | 8.59E-01 | 8.65E-01 |
| 8157534 | NM_007018    | CEP110       | centrosomal protein 110kDa                                                             | WT only | 1.43 | 0.89 | 1.13 | 1.15 | 1.40E-02 | 3.64E-01 | 8.24E-01 | 8.60E-01 |
| 7899990 | NM_014284    | NCDN         | neurochondrin                                                                          | WT only | 0.73 | 0.88 | 0.85 | 0.82 | 9.83E-03 | 2.41E-01 | 5.15E-01 | 2.70E-01 |
| 8047467 | NM_139158    | PFTK2        | PFTAIRE protein kinase 2                                                               | WT only | 4.33 | 0.88 | 1.71 | 1.43 | 4.17E-05 | 5.26E-01 | 7.43E-02 | 2.81E-01 |
| 7996677 | NM_005796    | NUTF2        | nuclear transport factor 2                                                             | WT only | 0.80 | 0.88 | 0.95 | 0.91 | 4.74E-02 | 2.07E-01 | 9.09E-01 | 9.85E-01 |
| 7931951 | NM_001029880 | SFMBT2       | Scm-like with four mbt domains 2                                                       | WT only | 0.76 | 0.87 | 0.82 | 0.89 | 3.13E-02 | 2.48E-01 | 4.84E-01 | 8.98E-01 |
| 8024089 | NM_024100    | WDR18        | WD repeat domain 18                                                                    | WT only | 0.75 | 0.87 | 0.93 | 0.89 | 3.06E-02 | 2.57E-01 | 8.81E-01 | 9.32E-01 |
| 8048257 | NM_015488    | PNKD         | paroxysmal nonkinisogenic dyskinesia                                                   | WT only | 0.75 | 0.87 | 0.90 | 0.86 | 1.02E-02 | 1.54E-01 | 8.02E-01 | 4.46E-01 |
| 8135149 | NM_020979    | SH2B2        | SH2B adaptor protein 2                                                                 | WT only | 0.75 | 0.87 | 0.82 | 0.86 | 4.11E-02 | 3.09E-01 | 6.04E-01 | 8.38E-01 |
| 7907970 | XM_001131332 | LOC730144    | similar to translation initiation factor Eif1                                          | WT only | 1.33 | 0.87 | 1.11 | 1.15 | 4.41E-02 | 2.74E-01 | 8.41E-01 | 8.60E-01 |
| 8116096 | NM_016222    | DDX41        | DEAD (Asp-Glu-Ala-Asp) box polypeptide 41                                              | WT only | 0.77 | 0.87 | 0.89 | 0.84 | 4.17E-02 | 2.21E-01 | 8.09E-01 | 5.54E-01 |
| 8175438 | ---          | ---          | ---                                                                                    | WT only | 0.73 | 0.86 | 0.94 | 0.88 | 4.36E-02 | 3.32E-01 | 9.28E-01 | 1.00E+00 |
| 8137517 | NM_024012    | HTR5A        | 5-hydroxytryptamine (serotonin) receptor 5A                                            | WT only | 0.77 | 0.86 | 0.91 | 0.87 | 5.00E-02 | 2.46E-01 | 8.58E-01 | 8.63E-01 |
| 8146533 | NM_147189    | FAM110B      | family with sequence similarity 110, member B                                          | WT only | 1.31 | 0.86 | 1.25 | 1.07 | 4.49E-02 | 2.33E-01 | 4.37E-01 | 1.00E+00 |
| 7934783 | NM_015613    | LRIT1        | leucine-rich repeat, immunoglobulin-like and transmembrane domains 1                   | WT only | 0.76 | 0.86 | 0.88 | 0.86 | 3.27E-02 | 2.13E-01 | 8.01E-01 | 6.60E-01 |
| 7920912 | NM_020131    | UBQLN4       | ubiquilin 4                                                                            | WT only | 0.80 | 0.86 | 0.87 | 0.84 | 3.00E-02 | 1.06E-01 | 6.62E-01 | 3.05E-01 |
| 7999112 | NM_016069    | Magmas       | mitochondria-associated protein involved in granulocyte-macrophage colony-stimula      | WT only | 0.74 | 0.86 | 0.96 | 0.85 | 3.29E-02 | 2.46E-01 | 9.47E-01 | 7.45E-01 |
| 7922162 | NM_006996    | SLC19A2      | solute carrier family 19 (thiamine transporter), member 2                              | WT only | 0.69 | 0.86 | 0.91 | 0.90 | 9.21E-03 | 1.94E-01 | 8.38E-01 | 9.98E-01 |
| 8012896 | NM_000304    | PMP22        | peripheral myelin protein 22                                                           | WT only | 1.81 | 0.86 | 1.29 | 1.17 | 6.90E-03 | 4.33E-01 | 6.65E-01 | 1.00E+00 |
| 7927120 | NM_020975    | RET          | ret proto-oncogene                                                                     | WT only | 0.71 | 0.86 | 0.87 | 0.86 | 2.52E-02 | 2.70E-01 | 8.09E-01 | 8.78E-01 |
| 7928558 | NM_020338    | ZMIZ1        | zinc finger, MIZ-type containing 1                                                     | WT only | 0.77 | 0.85 | 0.80 | 0.80 | 1.55E-02 | 1.04E-01 | 1.83E-01 | 1.62E-01 |
| 7939590 | NM_018389    | SLC35C1      | solute carrier family 35, member C1                                                    | WT only | 0.73 | 0.85 | 0.80 | 0.80 | 1.38E-02 | 1.59E-01 | 3.07E-01 | 2.26E-01 |
| 7984008 | ---          | ---          | ---                                                                                    | WT only | 1.48 | 0.85 | 1.12 | 1.21 | 4.39E-02 | 4.18E-01 | 8.80E-01 | 8.93E-01 |
| 8076563 | NM_173467    | MCAT         | malonyl CoA:ACP acyltransferase (mitochondrial)                                        | WT only | 0.77 | 0.85 | 0.92 | 0.91 | 4.19E-02 | 1.76E-01 | 8.63E-01 | 1.00E+00 |
| 7945620 | NM_019009    | TOLLIP       | toll interacting protein                                                               | WT only | 0.78 | 0.85 | 0.86 | 0.87 | 4.46E-02 | 1.55E-01 | 7.26E-01 | 7.54E-01 |
| 8086505 | NM_016598    | ZDHHC3       | zinc finger, DHHC-type containing 3                                                    | WT only | 0.80 | 0.85 | 0.91 | 0.87 | 4.16E-02 | 1.15E-01 | 8.23E-01 | 6.27E-01 |
| 8160857 | NM_005866    | SIGMAR1      | sigma non-opioid intracellular receptor 1                                              | WT only | 0.78 | 0.85 | 0.94 | 0.88 | 3.10E-02 | 1.20E-01 | 8.89E-01 | 7.57E-01 |
| 8020183 | NM_014214    | IMPA2        | inositol(myo)-1(or 4)-monophosphatase 2                                                | WT only | 0.75 | 0.85 | 0.85 | 0.89 | 4.41E-02 | 2.14E-01 | 7.40E-01 | 1.00E+00 |
| 8165217 | NM_017617    | NOTCH1       | Notch homolog 1, translocation-associated (Drosophila)                                 | WT only | 0.75 | 0.85 | 0.78 | 0.80 | 2.35E-02 | 1.52E-01 | 2.13E-01 | 2.81E-01 |

|         |              |              |                                                                               |         |      |      |      |      |          |          |          |          |
|---------|--------------|--------------|-------------------------------------------------------------------------------|---------|------|------|------|------|----------|----------|----------|----------|
| 7904211 | NM_138959    | VANGL1       | vang-like 1 (van gogh, Drosophila)                                            | WT only | 0.74 | 0.85 | 0.85 | 0.86 | 2.52E-02 | 1.76E-01 | 6.96E-01 | 7.16E-01 |
| 7897685 | NM_013319    | UBIAD1       | UbiA prenyltransferase domain containing 1                                    | WT only | 0.76 | 0.85 | 0.89 | 0.86 | 3.22E-02 | 1.50E-01 | 8.16E-01 | 6.47E-01 |
| 8077595 | NM_001003694 | BRPF1        | bromodomain and PHD finger containing, 1                                      | WT only | 0.80 | 0.85 | 0.85 | 0.84 | 3.91E-02 | 9.50E-02 | 4.95E-01 | 3.68E-01 |
| 7976726 | NM_016337    | EVL          | Enah                                                                          | WT only | 0.76 | 0.85 | 0.92 | 0.88 | 4.93E-02 | 2.05E-01 | 8.82E-01 | 9.39E-01 |
| 8162455 | NM_004148    | NINJ1        | ninjurin 1                                                                    | WT only | 0.70 | 0.84 | 0.87 | 0.87 | 2.50E-02 | 2.36E-01 | 8.14E-01 | 9.79E-01 |
| 8032871 | NM_139159    | DPP9         | dipeptidyl-peptidase 9                                                        | WT only | 0.77 | 0.84 | 0.82 | 0.82 | 2.86E-02 | 1.14E-01 | 4.13E-01 | 3.10E-01 |
| 8026895 | NM_138442    | CCDC124      | coiled-coil domain containing 124                                             | WT only | 0.80 | 0.84 | 0.89 | 0.85 | 4.35E-02 | 9.11E-02 | 7.90E-01 | 4.61E-01 |
| 7902874 | NM_032270    | LRR8C        | leucine rich repeat containing 8 family, member C                             | WT only | 0.75 | 0.84 | 0.81 | 0.86 | 3.59E-02 | 1.66E-01 | 4.95E-01 | 7.09E-01 |
| 7949619 | NM_001532    | SLC29A2      | solute carrier family 29 (nucleoside transporters), member 2                  | WT only | 0.69 | 0.84 | 0.94 | 0.83 | 1.35E-02 | 1.97E-01 | 9.17E-01 | 5.96E-01 |
| 7937977 | ---          | ---          | ---                                                                           | WT only | 0.77 | 0.84 | 0.84 | 0.86 | 3.09E-02 | 1.21E-01 | 5.70E-01 | 6.15E-01 |
| 7945666 | NM_001909    | CTSD         | cathepsin D                                                                   | WT only | 0.77 | 0.84 | 0.86 | 0.84 | 3.92E-02 | 1.24E-01 | 7.28E-01 | 5.23E-01 |
| 8109283 | NM_001543    | NDST1        | N-deacetylase                                                                 | WT only | 0.73 | 0.84 | 0.94 | 0.85 | 1.13E-02 | 9.33E-02 | 8.81E-01 | 4.56E-01 |
| 7921133 | NM_004494    | HDFG         | hepatoma-derived growth factor (high-mobility group protein 1-like)           | WT only | 0.80 | 0.84 | 0.89 | 0.87 | 4.82E-02 | 7.87E-02 | 7.97E-01 | 5.90E-01 |
| 8110106 | NM_001131055 | HRH2         | histamine receptor H2                                                         | WT only | 0.61 | 0.83 | 0.71 | 0.76 | 2.83E-03 | 1.55E-01 | 1.01E-01 | 2.06E-01 |
| 8029437 | NM_006505    | PVR          | poliovirus receptor                                                           | WT only | 0.78 | 0.83 | 0.89 | 0.90 | 4.73E-02 | 1.18E-01 | 8.14E-01 | 9.88E-01 |
| 7999120 | NM_024535    | CORO7        | coronin 7                                                                     | WT only | 0.80 | 0.83 | 0.90 | 0.85 | 4.78E-02 | 7.41E-02 | 8.01E-01 | 4.76E-01 |
| 8041995 | NM_003128    | SPTBN1       | spectrin, beta, non-erythrocytic 1                                            | WT only | 1.27 | 0.83 | 1.11 | 1.07 | 4.69E-02 | 9.46E-02 | 8.23E-01 | 1.00E+00 |
| 8032480 | NM_016199    | LSM7         | LSM7 homolog, U6 small nuclear RNA associated (S. cerevisiae)                 | WT only | 0.72 | 0.83 | 0.87 | 0.78 | 4.26E-02 | 2.09E-01 | 8.23E-01 | 3.68E-01 |
| 7969986 | NM_006573    | TNFSF13B     | tumor necrosis factor (ligand) superfamily, member 13b                        | WT only | 0.58 | 0.83 | 0.73 | 0.85 | 3.16E-03 | 2.04E-01 | 2.36E-01 | 8.55E-01 |
| 8131374 | NM_006303    | JTV1         | JTV1 gene                                                                     | WT only | 0.76 | 0.83 | 0.89 | 0.86 | 4.07E-02 | 1.23E-01 | 8.16E-01 | 7.09E-01 |
| 8032365 | NM_031918    | KLF16        | Kruppel-like factor 16                                                        | WT only | 0.72 | 0.83 | 0.84 | 0.80 | 1.38E-02 | 1.04E-01 | 6.29E-01 | 3.05E-01 |
| 7950307 | NM_003355    | UCP2         | uncoupling protein 2 (mitochondrial, proton carrier)                          | WT only | 0.76 | 0.83 | 0.98 | 0.90 | 1.78E-02 | 7.49E-02 | 9.71E-01 | 8.99E-01 |
| 7926037 | NM_004566    | PFKFB3       | 6-phosphofructo-2-kinase                                                      | WT only | 0.78 | 0.83 | 0.84 | 0.87 | 2.91E-02 | 7.65E-02 | 5.15E-01 | 6.73E-01 |
| 8072160 | NM_032173    | ZNRF3        | zinc and ring finger 3                                                        | WT only | 0.71 | 0.83 | 0.89 | 0.87 | 6.62E-03 | 6.94E-02 | 8.01E-01 | 5.99E-01 |
| 8098877 | AK091779     | LOC100130872 | hypothetical LOC100130872                                                     | WT only | 0.73 | 0.83 | 0.95 | 0.86 | 4.19E-02 | 2.00E-01 | 9.31E-01 | 9.05E-01 |
| 7954717 | NM_001714    | BICD1        | bicaudal D homolog 1 (Drosophila)                                             | WT only | 0.68 | 0.83 | 0.85 | 0.85 | 4.85E-03 | 8.59E-02 | 6.03E-01 | 5.25E-01 |
| 8155699 | NM_000144    | FXN          | frataxin                                                                      | WT only | 0.64 | 0.83 | 0.86 | 0.85 | 7.96E-03 | 1.92E-01 | 8.03E-01 | 8.13E-01 |
| 8072979 | NM_021974    | POLR2F       | polymerase (RNA) II (DNA directed) polypeptide F                              | WT only | 0.76 | 0.83 | 0.88 | 0.83 | 4.02E-02 | 1.20E-01 | 8.13E-01 | 5.16E-01 |
| 8139891 | NM_016038    | SBDS         | Shwachman-Bodian-Diamond syndrome                                             | WT only | 0.77 | 0.83 | 0.90 | 0.91 | 3.78E-02 | 9.56E-02 | 8.36E-01 | 1.00E+00 |
| 7900931 | NM_003780    | B4GALT2      | UDP-Gal:betaGlcNAc beta 1,4-galactosyltransferase, polypeptide 2              | WT only | 0.77 | 0.83 | 0.92 | 0.86 | 4.93E-02 | 1.15E-01 | 8.71E-01 | 7.29E-01 |
| 8069644 | NM_000484    | APP          | amyloid beta (A4) precursor protein                                           | WT only | 0.74 | 0.83 | 0.93 | 0.92 | 2.68E-02 | 1.18E-01 | 8.81E-01 | 1.00E+00 |
| 8128620 | NM_001080450 | BEND3        | BEN domain containing 3                                                       | WT only | 0.74 | 0.83 | 0.89 | 0.86 | 4.31E-02 | 1.59E-01 | 8.36E-01 | 8.29E-01 |
| 8116532 | NR_002591    | SNORD95      | small nucleolar RNA, C                                                        | WT only | 0.79 | 0.83 | 1.03 | 0.92 | 3.95E-02 | 6.89E-02 | 9.52E-01 | 1.00E+00 |
| 7982326 | NM_015995    | KLF13        | Kruppel-like factor 13                                                        | WT only | 0.74 | 0.82 | 0.81 | 0.84 | 2.42E-02 | 1.09E-01 | 4.50E-01 | 5.42E-01 |
| 8149592 | NM_001135691 | SLC18A1      | solute carrier family 18 (vesicular monoamine), member 1                      | WT only | 0.78 | 0.82 | 0.93 | 0.87 | 4.00E-02 | 8.63E-02 | 8.82E-01 | 7.09E-01 |
| 8007084 | NM_000964    | RARA         | retinoic acid receptor, alpha                                                 | WT only | 0.76 | 0.82 | 0.96 | 0.85 | 2.70E-02 | 8.22E-02 | 9.33E-01 | 5.83E-01 |
| 8107591 | NM_207317    | ZNF474       | zinc finger protein 474                                                       | WT only | 0.75 | 0.82 | 0.94 | 0.89 | 4.11E-02 | 1.39E-01 | 9.12E-01 | 9.90E-01 |
| 7905349 | NM_024575    | TNFAIP8L2    | tumor necrosis factor, alpha-induced protein 8-like 2                         | WT only | 0.73 | 0.82 | 0.77 | 0.80 | 3.07E-02 | 1.44E-01 | 3.70E-01 | 4.23E-01 |
| 7924853 | NM_181462    | MRPL55       | mitochondrial ribosomal protein L55                                           | WT only | 0.75 | 0.82 | 0.95 | 0.88 | 1.40E-02 | 5.22E-02 | 9.06E-01 | 7.09E-01 |
| 8073682 | NM_022141    | PARVG        | parvin, gamma                                                                 | WT only | 0.75 | 0.82 | 0.89 | 0.86 | 2.51E-02 | 8.53E-02 | 8.09E-01 | 6.92E-01 |
| 8135172 | NM_001126340 | ORAI2        | ORAI calcium release-activated calcium modulator 2                            | WT only | 0.65 | 0.82 | 0.88 | 0.82 | 4.37E-03 | 9.75E-02 | 8.01E-01 | 4.02E-01 |
| 7998251 | NM_032366    | C16orf13     | chromosome 16 open reading frame 13                                           | WT only | 0.75 | 0.82 | 0.93 | 0.86 | 3.74E-02 | 1.11E-01 | 8.86E-01 | 7.88E-01 |
| 8013120 | NM_148172    | PEMT         | phosphatidylethanolamine N-methyltransferase                                  | WT only | 0.74 | 0.82 | 1.00 | 0.88 | 1.88E-02 | 7.43E-02 | 9.99E-01 | 8.56E-01 |
| 8070297 | NM_001136154 | ERG          | v-ets erythroblastosis virus E26 oncogene homolog (avian)                     | WT only | 0.72 | 0.81 | 0.92 | 0.90 | 3.99E-02 | 1.52E-01 | 8.86E-01 | 1.00E+00 |
| 8090591 | NM_015103    | PLXND1       | plexin D1                                                                     | WT only | 0.72 | 0.81 | 0.89 | 0.84 | 1.48E-02 | 7.41E-02 | 8.13E-01 | 5.28E-01 |
| 8030860 | NM_001462    | FPR2         | formyl peptide receptor 2                                                     | WT only | 0.61 | 0.81 | 0.61 | 0.74 | 4.70E-02 | 3.89E-01 | 2.42E-01 | 6.43E-01 |
| 7941976 | NM_002496    | NDUFS8       | NADH dehydrogenase (ubiquinone) Fe-S protein 8, 23kDa (NADH-coenzyme Q redox) | WT only | 0.72 | 0.81 | 0.87 | 0.85 | 2.79E-02 | 1.16E-01 | 8.13E-01 | 7.29E-01 |
| 7988921 | NM_000259    | MYO5A        | myosin VA (heavy chain 12, myosin)                                            | WT only | 0.72 | 0.81 | 0.85 | 0.85 | 1.54E-02 | 6.92E-02 | 6.89E-01 | 5.88E-01 |
| 8029688 | NM_012099    | CD3EAP       | CD3e molecule, epsilon associated protein                                     | WT only | 0.74 | 0.80 | 0.98 | 0.88 | 2.18E-02 | 6.88E-02 | 9.72E-01 | 8.90E-01 |
| 7939657 | NM_001105540 | DGKZ         | diacylglycerol kinase, zeta 104kDa                                            | WT only | 0.68 | 0.80 | 0.97 | 0.87 | 3.39E-02 | 2.00E-01 | 9.68E-01 | 1.00E+00 |
| 7921319 | NM_052938    | FCRL1        | Fc receptor-like 1                                                            | WT only | 1.35 | 0.80 | 1.45 | 1.03 | 2.58E-02 | 7.36E-02 | 5.99E-02 | 1.00E+00 |
| 8033332 | NR_024075    | EMR4P        | egf-like module containing, mucin-like, hormone receptor-like 4 pseudogene    | WT only | 1.44 | 0.80 | 0.98 | 0.97 | 3.00E-02 | 1.53E-01 | 9.82E-01 | 1.00E+00 |
| 8072798 | NM_013385    | CYTH4        | cytohesin 4                                                                   | WT only | 0.70 | 0.80 | 0.82 | 0.87 | 2.78E-02 | 1.31E-01 | 6.88E-01 | 9.72E-01 |
| 8044844 | NM_001105198 | TMEM177      | transmembrane protein 177                                                     | WT only | 0.75 | 0.80 | 0.92 | 0.86 | 2.42E-02 | 5.49E-02 | 8.63E-01 | 6.34E-01 |
| 8003210 | NM_206967    | C16orf74     | chromosome 16 open reading frame 74                                           | WT only | 0.69 | 0.80 | 0.88 | 0.87 | 4.73E-02 | 2.00E-01 | 8.56E-01 | 1.00E+00 |
| 8109350 | NM_078483    | SLC36A1      | solute carrier family 36 (proton)                                             | WT only | 0.74 | 0.80 | 0.73 | 0.78 | 3.70E-02 | 8.38E-02 | 1.79E-01 | 2.78E-01 |
| 8087210 | NM_004157    | PRKAR2A      | protein kinase, cAMP-dependent, regulatory, type II, alpha                    | WT only | 0.74 | 0.80 | 0.87 | 0.85 | 3.70E-02 | 9.11E-02 | 8.14E-01 | 7.42E-01 |
| 8153424 | NM_001100878 | C8orf73      | chromosome 8 open reading frame 73                                            | WT only | 0.64 | 0.80 | 0.86 | 0.82 | 3.00E-03 | 5.58E-02 | 7.36E-01 | 4.28E-01 |
| 8028705 | NM_001001563 | TIMM50       | translocase of inner mitochondrial membrane 50 homolog (S. cerevisiae)        | WT only | 0.76 | 0.80 | 0.91 | 0.86 | 3.12E-02 | 5.44E-02 | 8.38E-01 | 6.91E-01 |
| 8012349 | NM_002616    | PER1         | period homolog 1 (Drosophila)                                                 | WT only | 0.75 | 0.79 | 0.83 | 0.79 | 4.54E-02 | 8.45E-02 | 7.12E-01 | 3.70E-01 |
| 8066776 | NM_033550    | TP53RK       | TP53 regulating kinase                                                        | WT only | 1.61 | 0.79 | 1.03 | 1.06 | 5.49E-03 | 9.49E-02 | 9.72E-01 | 1.00E+00 |
| 8072847 | NM_018957    | SH3BP1       | SH3-domain binding protein 1                                                  | WT only | 0.72 | 0.79 | 0.78 | 0.80 | 2.68E-02 | 7.64E-02 | 3.97E-01 | 3.69E-01 |
| 8004804 | NM_012393    | PFAS         | phosphoribosylformylglycinamide synthase                                      | WT only | 0.74 | 0.79 | 0.89 | 0.85 | 4.03E-02 | 8.52E-02 | 8.38E-01 | 7.83E-01 |
| 7968890 | NM_003646    | DGKZ         | diacylglycerol kinase, zeta 104kDa                                            | WT only | 0.75 | 0.79 | 0.84 | 0.82 | 4.36E-02 | 6.83E-02 | 7.14E-01 | 5.28E-01 |
| 8088958 | NM_000158    | GBE1         | glucan (1,4-alpha-), branching enzyme 1                                       | WT only | 0.67 | 0.79 | 0.76 | 0.79 | 1.92E-02 | 1.09E-01 | 4.08E-01 | 4.78E-01 |

|         |              |           |                                                                                     |                     |      |      |      |      |          |          |          |          |
|---------|--------------|-----------|-------------------------------------------------------------------------------------|---------------------|------|------|------|------|----------|----------|----------|----------|
| 7927405 | NM_020945    | WDFY4     | WDFY family member 4                                                                | WT only             | 0.64 | 0.79 | 0.78 | 0.80 | 5.56E-03 | 7.36E-02 | 4.13E-01 | 4.23E-01 |
| 8032094 | NM_024888    | PRG2      | plasticity-related gene 2                                                           | WT only             | 0.73 | 0.79 | 0.85 | 0.84 | 2.45E-02 | 5.74E-02 | 7.29E-01 | 5.96E-01 |
| 7940473 | NM_016464    | TMEM138   | transmembrane protein 138                                                           | WT only             | 0.76 | 0.78 | 0.94 | 0.85 | 4.16E-02 | 5.01E-02 | 8.94E-01 | 6.43E-01 |
| 8026982 | NM_032683    | FKSG24    | hypothetical protein MGC12972                                                       | WT only             | 0.72 | 0.78 | 0.86 | 0.78 | 3.02E-02 | 7.63E-02 | 8.01E-01 | 3.28E-01 |
| 8063115 | NM_004994    | MMP9      | matrix metalloproteinase 9 (gelatinase B, 92kDa gelatinase, 92kDa type IV collagena | WT only             | 0.66 | 0.78 | 0.74 | 0.78 | 3.35E-02 | 1.70E-01 | 5.03E-01 | 6.15E-01 |
| 8104180 | NM_020731    | AHRR      | aryl-hydrocarbon receptor repressor                                                 | WT only             | 0.71 | 0.78 | 0.73 | 0.81 | 2.36E-02 | 7.44E-02 | 2.09E-01 | 5.01E-01 |
| 8024572 | NM_002068    | GNA15     | guanine nucleotide binding protein (G protein), alpha 15 (Gq class)                 | WT only             | 0.72 | 0.78 | 1.02 | 0.89 | 2.36E-02 | 5.50E-02 | 9.82E-01 | 9.88E-01 |
| 8132980 | ---          | ---       | ---                                                                                 | WT only             | 0.76 | 0.78 | 0.81 | 0.78 | 4.83E-02 | 5.79E-02 | 5.15E-01 | 2.74E-01 |
| 7901087 | NM_032756    | HPDL      | 4-hydroxyphenylpyruvate dioxygenase-like                                            | WT only             | 0.70 | 0.78 | 0.94 | 0.84 | 1.33E-02 | 5.01E-02 | 9.15E-01 | 6.27E-01 |
| 8071899 | NM_000675    | ADORA2A   | adenosine A2a receptor                                                              | WT only             | 0.73 | 0.78 | 0.77 | 0.84 | 4.45E-02 | 7.49E-02 | 4.14E-01 | 7.29E-01 |
| 7927981 | NM_003171    | SUPV3L1   | suppressor of var1, 3-like 1 (S. cerevisiae)                                        | WT only             | 0.72 | 0.78 | 0.88 | 0.89 | 2.78E-02 | 6.52E-02 | 8.23E-01 | 1.00E+00 |
| 8004694 | NM_144607    | CYB5D1    | cytochrome b5 domain containing 1                                                   | WT only             | 0.75 | 0.77 | 0.89 | 0.86 | 3.95E-02 | 5.01E-02 | 8.25E-01 | 8.17E-01 |
| 7997059 | NM_018332    | DDX19A    | DEAD (Asp-Glu-Ala-As) box polypeptide 19A                                           | WT only             | 0.74 | 0.77 | 0.88 | 0.85 | 4.93E-02 | 6.58E-02 | 8.34E-01 | 7.87E-01 |
| 8066697 | NM_173179    | SLC35C2   | solute carrier family 35, member C2                                                 | WT only             | 0.75 | 0.77 | 0.87 | 0.86 | 4.74E-02 | 5.30E-02 | 8.13E-01 | 7.91E-01 |
| 8068833 | NM_002606    | PDE9A     | phosphodiesterase 9A                                                                | WT only             | 0.62 | 0.77 | 0.72 | 0.80 | 6.81E-03 | 7.50E-02 | 2.08E-01 | 5.28E-01 |
| 8115144 | NM_001012301 | ARSI      | arylsulfatase family, member I                                                      | WT only             | 0.73 | 0.77 | 0.88 | 0.83 | 4.28E-02 | 6.78E-02 | 8.32E-01 | 6.95E-01 |
| 8049722 | NM_005301    | GPR35     | G protein-coupled receptor 35                                                       | WT only             | 0.63 | 0.76 | 0.85 | 0.82 | 1.74E-02 | 1.04E-01 | 8.16E-01 | 7.53E-01 |
| 8132305 | NM_030636    | EEPD1     | endonuclease                                                                        | WT only             | 0.61 | 0.76 | 0.73 | 0.75 | 4.95E-03 | 5.01E-02 | 2.13E-01 | 2.30E-01 |
| 8143825 | NM_000238    | KCNH2     | potassium voltage-gated channel, subfamily H (eag-related), member 2                | WT only             | 1.78 | 0.76 | 1.71 | 1.19 | 6.90E-03 | 1.18E-01 | 5.99E-02 | 9.72E-01 |
| 8153678 | NM_015201    | BOP1      | block of proliferation 1                                                            | WT only             | 0.72 | 0.75 | 0.83 | 0.83 | 3.56E-02 | 5.09E-02 | 7.26E-01 | 6.60E-01 |
| 8066848 | NM_020820    | PREX1     | phosphatidylinositol-3,4,5-trisphosphate-dependent Rac exchange factor 1            | WT only             | 0.67 | 0.74 | 0.81 | 0.80 | 2.23E-02 | 6.30E-02 | 7.24E-01 | 5.88E-01 |
| 8095110 | NM_000222    | KIT       | v-kit Hardy-Zuckerman 4 feline sarcoma viral oncogene homolog                       | WT only             | 0.58 | 0.74 | 0.70 | 0.77 | 3.07E-02 | 2.01E-01 | 5.43E-01 | 7.99E-01 |
| 8068593 | NM_005239    | ETS2      | v-ets erythroblastosis virus E26 oncogene homolog 2 (avian)                         | WT only             | 0.61 | 0.74 | 0.87 | 0.85 | 7.48E-03 | 5.49E-02 | 8.36E-01 | 9.05E-01 |
| 8031297 | NM_014218    | KIR2DL1   | killer cell immunoglobulin-like receptor, two domains, long cytoplasmic tail, 1     | WT only             | 0.70 | 0.74 | 0.83 | 0.81 | 4.17E-02 | 6.83E-02 | 7.71E-01 | 6.86E-01 |
| 8041170 | ---          | ---       | ---                                                                                 | WT only             | 0.58 | 0.74 | 0.93 | 0.81 | 2.31E-02 | 1.61E-01 | 9.43E-01 | 9.45E-01 |
| 8084891 | NM_153690    | FAM43A    | family with sequence similarity 43, member A                                        | WT only             | 0.66 | 0.74 | 0.72 | 0.77 | 2.40E-02 | 6.91E-02 | 3.50E-01 | 4.56E-01 |
| 8022404 | NM_001098801 | C18orf19  | chromosome 18 open reading frame 19                                                 | WT only             | 0.69 | 0.73 | 0.80 | 0.87 | 4.07E-02 | 6.00E-02 | 7.24E-01 | 1.00E+00 |
| 8039842 | NM_012312    | KIR2DS2   | killer cell immunoglobulin-like receptor, two domains, short cytoplasmic tail, 2    | WT only             | 0.69 | 0.73 | 0.82 | 0.80 | 3.70E-02 | 5.10E-02 | 7.50E-01 | 6.13E-01 |
| 8039829 | NM_014219    | KIR2DL2   | killer cell immunoglobulin-like receptor, two domains, long cytoplasmic tail, 2     | WT only             | 0.70 | 0.73 | 0.83 | 0.81 | 4.39E-02 | 5.82E-02 | 7.86E-01 | 6.96E-01 |
| 7928126 | NM_014431    | KIAA1274  | KIAA1274                                                                            | WT only             | 0.62 | 0.72 | 0.76 | 0.79 | 1.45E-02 | 5.55E-02 | 5.36E-01 | 6.08E-01 |
| 8166906 | NM_001097579 | GPR34     | G protein-coupled receptor 34                                                       | WT only             | 2.61 | 0.71 | 1.37 | 1.17 | 5.75E-03 | 2.38E-01 | 8.01E-01 | 1.00E+00 |
| 8082035 | NM_175862    | CD86      | CD86 molecule                                                                       | WT only             | 0.56 | 0.69 | 0.80 | 0.77 | 4.06E-02 | 1.65E-01 | 8.38E-01 | 9.39E-01 |
| 7953211 | NM_020375    | C12orf5   | chromosome 12 open reading frame 5                                                  | WT only             | 0.54 | 0.69 | 0.73 | 0.76 | 2.94E-02 | 1.45E-01 | 7.52E-01 | 8.78E-01 |
| 8149485 | NM_004686    | MTMR7     | myotubularin related protein 7                                                      | WT only             | 0.64 | 0.68 | 0.85 | 0.82 | 4.93E-02 | 6.43E-02 | 8.55E-01 | 9.59E-01 |
| 8072108 | NM_020437    | ASPHD2    | aspartate beta-hydroxylase domain containing 2                                      | WT only             | 0.63 | 0.68 | 0.86 | 0.83 | 4.32E-02 | 6.76E-02 | 8.59E-01 | 1.00E+00 |
| 8095626 | ---          | ---       | ---                                                                                 | WT only             | 0.55 | 0.67 | 0.61 | 0.69 | 2.39E-02 | 9.10E-02 | 2.75E-01 | 4.56E-01 |
| 8168517 | NM_005296    | LPAR4     | lysophosphatidic acid receptor 4                                                    | WT only             | 0.61 | 0.65 | 0.81 | 0.80 | 3.79E-02 | 5.23E-02 | 8.23E-01 | 8.98E-01 |
| 8006433 | NM_002982    | CCL2      | chemokine (C-C motif) ligand 2                                                      | WT only             | 0.27 | 0.44 | 0.42 | 0.51 | 1.16E-02 | 6.07E-02 | 3.57E-01 | 5.00E-01 |
| 8136709 | NR_003715    | LOC93432  | maltase-glucoamylase-like pseudogene                                                | WT, delT355, L359V  | 3.29 | 3.49 | 1.45 | 1.75 | 3.42E-05 | 2.95E-05 | 1.23E-01 | 1.28E-02 |
| 7930454 | NM_145341    | PDCD4     | programmed cell death 4 (neoplastic transformation inhibitor)                       | WT, delT355, L359V  | 1.86 | 2.09 | 1.28 | 1.52 | 4.30E-04 | 1.11E-04 | 2.47E-01 | 2.05E-02 |
| 8012558 | NM_014308    | PIK3R5    | phosphoinositide-3-kinase, regulatory subunit 5                                     | WT, delT355, L359V  | 0.58 | 0.66 | 0.74 | 0.70 | 4.79E-04 | 1.61E-03 | 8.10E-02 | 2.91E-02 |
| 7906486 | NM_020125    | SLAMF8    | SLAM family member 8                                                                | WT, delT355, L359V  | 0.51 | 0.47 | 0.64 | 0.63 | 1.11E-03 | 4.03E-04 | 5.85E-02 | 4.44E-02 |
| 7905789 | NM_000565    | IL6R      | interleukin 6 receptor                                                              | WT, delT355, L359V  | 0.46 | 0.34 | 0.67 | 0.59 | 3.09E-04 | 4.20E-05 | 6.16E-02 | 1.27E-02 |
| 8151310 | NM_000503    | EYA1      | eyes absent homolog 1 (Drosophila)                                                  | WT, T354M and L359V | 2.35 | 3.68 | 1.90 | 1.82 | 1.56E-03 | 9.38E-05 | 4.13E-02 | 5.73E-02 |
| 7936050 | NM_000102    | CYP17A1   | cytochrome P450, family 17, subfamily A, polypeptide 1                              | WT, T354M and L359V | 2.93 | 3.38 | 2.95 | 1.99 | 2.08E-03 | 7.06E-04 | 1.25E-02 | 9.67E-02 |
| 8078888 | NM_005201    | CCR8      | chemokine (C-C motif) receptor 8                                                    | WT, T354M and L359V | 1.94 | 2.73 | 1.89 | 1.64 | 5.94E-03 | 4.20E-04 | 4.30E-02 | 1.19E-01 |
| 7923792 | NM_033102    | SLC45A3   | solute carrier family 45, member 3                                                  | WT, T354M and L359V | 2.31 | 2.67 | 1.71 | 1.52 | 2.54E-04 | 6.68E-05 | 1.76E-02 | 5.73E-02 |
| 7898407 | AK125737     | LOC440570 | LOC440570                                                                           | WT, T354M and L359V | 3.00 | 2.63 | 2.16 | 1.74 | 3.09E-04 | 4.48E-04 | 1.40E-02 | 6.58E-02 |
| 8014891 | NM_012481    | IKZF3     | IKAROS family zinc finger 3 (Aiolos)                                                | WT, T354M and L359V | 3.36 | 1.95 | 2.29 | 1.60 | 1.41E-04 | 2.96E-03 | 1.01E-02 | 1.17E-01 |
| 7969050 | NM_020377    | CYSLTR2   | cysteinyl leukotriene receptor 2                                                    | WT, T354M and L359V | 3.02 | 1.95 | 2.40 | 1.65 | 1.52E-03 | 1.39E-02 | 3.15E-02 | 2.70E-01 |
| 8024557 | NM_002067    | GNA11     | guanine nucleotide binding protein (G protein), alpha 11 (Gq class)                 | WT, T354M and L359V | 1.57 | 1.94 | 1.46 | 1.45 | 3.18E-03 | 2.75E-04 | 4.79E-02 | 5.40E-02 |
| 8059139 | NM_001077198 | ATG9A     | ATG9 autophagy related 9 homolog A (S. cerevisiae)                                  | WT, T354M and L359V | 1.62 | 1.85 | 1.44 | 1.32 | 1.83E-03 | 3.35E-04 | 4.79E-02 | 1.26E-01 |
| 8010778 | ---          | ---       | ---                                                                                 | WT, T354M and L359V | 1.45 | 1.78 | 1.74 | 1.31 | 4.68E-02 | 3.82E-03 | 4.13E-02 | 4.71E-01 |
| 8138789 | NM_175061    | JAZF1     | JAZF zinc finger 1                                                                  | WT, T354M and L359V | 1.73 | 1.74 | 1.50 | 1.31 | 1.32E-03 | 8.19E-04 | 4.10E-02 | 1.94E-01 |
| 7902810 | NM_006769    | LMO4      | LIM domain only 4                                                                   | WT, T354M and L359V | 2.21 | 1.46 | 1.56 | 1.42 | 1.17E-04 | 5.15E-03 | 1.80E-02 | 5.73E-02 |
| 8002729 | NM_012201    | GLG1      | golgi apparatus protein 1                                                           | WT, T354M and L359V | 0.74 | 0.78 | 0.66 | 0.84 | 1.25E-02 | 2.06E-02 | 1.64E-02 | 4.14E-01 |
| 7908968 | NM_017773    | LAX1      | lymphocyte transmembrane adaptor 1                                                  | WT, T354M and L359V | 2.88 | 0.70 | 1.72 | 1.28 | 5.02E-05 | 1.65E-02 | 1.74E-02 | 3.50E-01 |
| 8008646 | NM_021626    | SCPEP1    | serine carboxypeptidase 1                                                           | WT, T354M and L359V | 0.51 | 0.65 | 0.50 | 0.71 | 3.96E-03 | 2.40E-02 | 1.94E-02 | 3.05E-01 |
| 8106411 | NM_130772    | S100Z     | S100 calcium binding protein Z                                                      | WT, T354M and L359V | 0.42 | 0.64 | 0.51 | 0.67 | 3.09E-04 | 8.41E-03 | 1.01E-02 | 9.40E-02 |
| 8026456 | NM_000896    | CYP4F3    | cytochrome P450, family 4, subfamily F, polypeptide 3                               | WT, T354M and L359V | 0.63 | 0.64 | 0.59 | 0.68 | 1.17E-02 | 8.54E-03 | 3.17E-02 | 1.11E-01 |
| 8085293 | NR_024138    | GHRL      | ghrelin                                                                             | WT, T354M and L359V | 0.65 | 0.63 | 0.66 | 0.75 | 7.25E-03 | 3.40E-03 | 4.79E-02 | 2.12E-01 |
| 7905571 | NM_002965    | S100A9    | S100 calcium binding protein A9                                                     | WT, T354M and L359V | 0.57 | 0.62 | 0.61 | 0.69 | 3.10E-03 | 4.87E-03 | 3.85E-02 | 1.05E-01 |
| 8094228 | NM_004334    | BST1      | bone marrow stromal cell antigen 1                                                  | WT, T354M and L359V | 0.66 | 0.62 | 0.65 | 0.75 | 2.96E-03 | 1.01E-03 | 1.71E-02 | 8.55E-02 |
| 8099760 | NM_015230    | ARAP2     | ArfGAP with RhoGAP domain, ankyrin repeat and PH domain 2                           | WT, T354M and L359V | 0.47 | 0.59 | 0.57 | 0.70 | 1.59E-03 | 6.70E-03 | 4.13E-02 | 2.29E-01 |
| 7935058 | NM_013451    | MYOF      | myoferlin                                                                           | WT, T354M and L359V | 0.58 | 0.58 | 0.59 | 0.70 | 1.30E-03 | 8.25E-04 | 1.14E-02 | 5.73E-02 |

|         |              |           |                                                                                   |                           |       |       |      |      |          |          |          |          |
|---------|--------------|-----------|-----------------------------------------------------------------------------------|---------------------------|-------|-------|------|------|----------|----------|----------|----------|
| 8041467 | NM_053276    | VIT       | vitrin                                                                            | WT, T354M and L359V       | 0.58  | 0.57  | 0.62 | 0.72 | 2.91E-03 | 1.71E-03 | 3.14E-02 | 1.62E-01 |
| 7986195 | NM_014848    | SV2B      | synaptic vesicle glycoprotein 2B                                                  | WT, T354M and L359V       | 0.56  | 0.55  | 0.56 | 0.68 | 8.03E-03 | 4.43E-03 | 4.79E-02 | 2.18E-01 |
| 7910387 | NM_021205    | RHOU      | ras homolog gene family, member U                                                 | WT, T354M and L359V       | 0.59  | 0.51  | 0.67 | 0.73 | 6.07E-04 | 1.24E-04 | 1.80E-02 | 5.73E-02 |
| 8051583 | NM_000104    | CYP1B1    | cytochrome P450, family 1, subfamily B, polypeptide 1                             | WT, T354M and L359V       | 0.42  | 0.51  | 0.37 | 0.55 | 5.42E-03 | 1.35E-02 | 1.76E-02 | 1.49E-01 |
| 8104492 | NM_031916    | ROPN1L    | ropporin 1-like                                                                   | WT, T354M and L359V       | 0.32  | 0.29  | 0.43 | 0.50 | 1.22E-03 | 5.59E-04 | 4.10E-02 | 8.32E-02 |
| 8014160 | NM_002981    | CCL1      | chemokine (C-C motif) ligand 1                                                    | WT, T354M and L359V       | 0.18  | 0.28  | 0.27 | 0.37 | 1.59E-03 | 5.33E-03 | 4.10E-02 | 1.22E-01 |
| 7960900 | NM_014358    | CLEC4E    | C-type lectin domain family 4, member E                                           | WT, T354M and L359V       | 0.27  | 0.23  | 0.41 | 0.44 | 8.71E-04 | 3.10E-04 | 4.10E-02 | 5.50E-02 |
| 8101780 | NM_014485    | PGDS      | prostaglandin D2 synthase, hematopoietic                                          | WT, T354M, delT355, L359V | 13.61 | 15.38 | 3.44 | 3.77 | 2.32E-05 | 2.16E-05 | 9.09E-03 | 5.30E-03 |
| 7995096 | NM_000632    | ITGAM     | integrin, alpha M (complement component 3 receptor 3 subunit)                     | WT, T354M, delT355, L359V | 3.11  | 4.13  | 1.85 | 1.83 | 5.02E-05 | 2.37E-05 | 1.25E-02 | 1.22E-02 |
| 8085062 | NM_000564    | IL5RA     | interleukin 5 receptor, alpha                                                     | WT, T354M, delT355, L359V | 5.55  | 3.98  | 2.16 | 2.24 | 4.90E-05 | 1.41E-04 | 3.14E-02 | 2.12E-02 |
| 8083260 | NM_001870    | CPA3      | carboxypeptidase A3 (mast cell)                                                   | WT, T354M, delT355, L359V | 9.11  | 3.79  | 4.37 | 2.53 | 3.30E-05 | 3.55E-04 | 1.55E-03 | 2.05E-02 |
| 7912802 | AK125737     | LOC440570 | LOC440570                                                                         | WT, T354M, delT355, L359V | 4.35  | 3.77  | 2.83 | 2.09 | 3.30E-05 | 4.20E-05 | 1.54E-03 | 9.03E-03 |
| 7988672 | NM_002112    | HDC       | histidine decarboxylase                                                           | WT, T354M, delT355, L359V | 3.67  | 3.61  | 1.96 | 1.91 | 3.83E-05 | 4.20E-05 | 1.25E-02 | 1.22E-02 |
| 8022356 | NM_001128626 | SPIRE1    | spire homolog 1 (Drosophila)                                                      | WT, T354M, delT355, L359V | 2.22  | 3.30  | 1.86 | 1.70 | 4.79E-04 | 4.20E-05 | 1.25E-02 | 2.45E-02 |
| 7963851 | NM_001098815 | KIAA0748  | KIAA0748                                                                          | WT, T354M, delT355, L359V | 2.54  | 3.19  | 1.99 | 1.78 | 1.17E-04 | 3.58E-05 | 4.83E-03 | 1.07E-02 |
| 8097098 | NM_019050    | USP53     | ubiquitin specific peptidase 53                                                   | WT, T354M, delT355, L359V | 3.12  | 3.11  | 1.78 | 1.82 | 3.42E-05 | 3.58E-05 | 1.25E-02 | 8.90E-03 |
| 7903507 | NM_001010883 | FAM102B   | family with sequence similarity 102, member B                                     | WT, T354M, delT355, L359V | 3.31  | 2.73  | 1.89 | 1.78 | 1.54E-05 | 2.37E-05 | 1.55E-03 | 5.30E-03 |
| 8090469 | NM_032638    | GATA2     | GATA binding protein 2                                                            | WT, T354M, delT355, L359V | 2.81  | 2.73  | 2.46 | 1.88 | 5.21E-05 | 5.88E-05 | 1.23E-03 | 8.17E-03 |
| 7969544 | NM_019080    | NDFIP2    | Nedd4 family interacting protein 2                                                | WT, T354M, delT355, L359V | 2.79  | 2.61  | 2.01 | 1.81 | 6.25E-05 | 8.06E-05 | 4.83E-03 | 9.99E-03 |
| 8114536 | NM_198282    | TMEM173   | transmembrane protein 173                                                         | WT, T354M, delT355, L359V | 2.05  | 2.41  | 1.61 | 1.53 | 3.09E-04 | 6.68E-05 | 1.80E-02 | 2.91E-02 |
| 7983650 | NM_003645    | SLC27A2   | solute carrier family 27 (fatty acid transporter), member 2                       | WT, T354M, delT355, L359V | 3.01  | 2.23  | 2.23 | 1.74 | 2.32E-05 | 6.68E-05 | 7.55E-04 | 5.30E-03 |
| 8037679 | NM_004943    | DMWD      | dystrophia myotonica, WD repeat containing                                        | WT, T354M, delT355, L359V | 1.92  | 2.13  | 1.38 | 1.46 | 1.17E-04 | 4.20E-05 | 4.10E-02 | 1.53E-02 |
| 7923131 | NM_144977    | DENND1B   | DENN                                                                              | WT, T354M, delT355, L359V | 2.18  | 1.70  | 1.52 | 1.43 | 6.55E-05 | 5.73E-04 | 1.80E-02 | 3.96E-02 |
| 7923141 | NM_144977    | DENND1B   | DENN                                                                              | WT, T354M, delT355, L359V | 2.07  | 1.60  | 1.49 | 1.41 | 5.21E-05 | 5.59E-04 | 1.25E-02 | 2.45E-02 |
| 7948667 | NM_001620    | AHNAK     | AHNAK nucleoprotein                                                               | WT, T354M, delT355, L359V | 3.14  | 1.55  | 1.69 | 1.65 | 3.45E-05 | 5.88E-03 | 1.80E-02 | 2.26E-02 |
| 8002403 | NM_138383    | MTSS1L    | metastasis suppressor 1-like                                                      | WT, T354M, delT355, L359V | 0.43  | 0.62  | 0.61 | 0.65 | 3.30E-05 | 5.28E-04 | 4.39E-03 | 8.90E-03 |
| 8031328 | NM_006737    | KIR3DL2   | killer cell immunoglobulin-like receptor, three domains, long cytoplasmic tail, 2 | WT, T354M, delT355, L359V | 0.50  | 0.55  | 0.63 | 0.66 | 2.93E-04 | 4.56E-04 | 1.76E-02 | 2.65E-02 |
| 7932985 | NM_003873    | NRP1      | neuropilin 1                                                                      | WT, T354M, delT355, L359V | 0.46  | 0.47  | 0.41 | 0.57 | 1.02E-03 | 8.42E-04 | 2.74E-03 | 3.28E-02 |
| 8076690 | NM_001009880 | C22orf9   | chromosome 22 open reading frame 9                                                | WT, T354M, delT355, L359V | 0.48  | 0.45  | 0.65 | 0.65 | 2.54E-04 | 1.03E-04 | 2.62E-02 | 2.44E-02 |
| 8031374 | NM_002000    | FCAR      | Fc fragment of IgA, receptor for                                                  | WT, T354M, delT355, L359V | 0.37  | 0.35  | 0.52 | 0.54 | 6.34E-05 | 4.97E-05 | 8.03E-03 | 8.90E-03 |
| 7923547 | NM_001276    | CHI3L1    | chitinase 3-like 1 (cartilage glycoprotein-39)                                    | WT, T354M, delT355, L359V | 0.30  | 0.30  | 0.32 | 0.44 | 4.90E-05 | 4.20E-05 | 7.55E-04 | 5.30E-03 |
| 7920244 | NM_002964    | S100A8    | S100 calcium binding protein A8                                                   | WT, T354M, delT355, L359V | 0.24  | 0.17  | 0.29 | 0.37 | 6.25E-05 | 2.95E-05 | 1.29E-03 | 5.30E-03 |



**Supplementary Table 7. GATA2 and other hematopoietic factors: interactions and targets.**

| <b>GATA2 interacting partners</b>        | <b>Supplementary Reference</b> |
|------------------------------------------|--------------------------------|
| GATA1                                    | 3                              |
| SPI1 (PU.1)                              | 4                              |
| ZFPM1 (FOG1)                             | 5                              |
| ZFPM2 (FOG2)                             | 6                              |
| LMO2                                     | 7                              |
| PML                                      | 8                              |
| ZBTB16 (PLZF)                            | 9                              |
| RARA (RAR $\alpha$ )                     | 10                             |
| FLI1                                     | 11                             |
| TAL1                                     | 7,11                           |
| <b>GATA2 target genes</b>                |                                |
| GATA1                                    | 12                             |
| RUNX1                                    | 13                             |
| CEBPA                                    | 14,15                          |
| FLI1                                     | 11                             |
| TAL1                                     | 11                             |
| SPI1 (PU.1)                              | 15,16                          |
| <b>Regulators of GATA2 transcription</b> |                                |
| GATA1                                    | 17                             |
| FLI1                                     | 11                             |
| TAL1                                     | 11                             |
| CEBPA                                    | 14,18                          |
| HOXA9                                    | 19                             |
| EVI1                                     | 20                             |
| NOTCH1                                   | 21                             |

**Supplementary Table 8. Primer sequences for HRM analysis of GATA2 coding exons.**

Primer sequences were designed using Primer3<sup>2</sup> to span all coding exons and splice junctions. The optimal PCR amplification conditions including MgCl<sub>2</sub> concentration and touchdown PCR annealing temperatures are given. Touchdown was performed at 1°C/cycle until the lower target temperature was achieved, and subsequent annealing was performed at this temperature to a total of 50 cycles.

| Primer Name   | Primer Sequence         | MgCl <sub>2</sub> (mM) | Touchdown PCR |
|---------------|-------------------------|------------------------|---------------|
| GATA2Ex2a(f)  | ACCTCGTGGTGGGACTTTGG    | 2.0                    | 68°C → 65°C   |
| GATA2Ex2a(r)  | ACCTCGTCTGGAGGCAGCAG    |                        |               |
| GATA2Ex2b(f)  | CACCCGGCCGTGCTGAAT      | 2.0                    | 68°C → 65°C   |
| GATA2Ex2b(r)  | CGCCTGGGTTCTCATCACCA    |                        |               |
| GATA2Ex3a(f)  | TGATCTTTCTGCCACCCTGAT   | 2.0                    | 68°C → 65°C   |
| GATA2Ex3a(r)  | TACACAGAGAGTGGGCCTCCAG  |                        |               |
| GATA2Ex3b(f)  | GTGAGCCCCTTCTCCAAGACG   | 2.0                    | 68°C → 65°C   |
| GATA2Ex3b(r)  | CGGAAGATGAGGCTGGAGACG   |                        |               |
| GATA2Ex3c(f)  | CCACCCAAAGAAGTGTCTCCTGA | 3.5                    | 68°C → 63°C   |
| GATA2Ex3c(r)  | GCCGGCACATAGGAGGGGTAG   |                        |               |
| GATA2Ex3d(f)  | CTGCGCCCAGGCCTAGCTACTAT | 3.5                    | 68°C → 63°C   |
| GATA2Ex3d(r)  | AAAAACGCAAATGCTCCCCTCTT |                        |               |
| GATA2Ex4(f)   | GTTAAGCAGGCCCCCGTGT     | 2.5                    | 68°C → 63°C   |
| GATA2Ex4(r)   | CCTGTAATTAACCGCCAGCTCCT |                        |               |
| GATA2Exon5(f) | CCTGCTGACGCTGCCTTG      | 2.5                    | 68°C → 62°C   |
| GATA2Exon5(r) | GGTCCCCGTTGGCGTTTC      |                        |               |
| GATA2Ex5(f)   | TTTAGCCCTCCTTGACTGAGC   | 2.0                    | 68°C → 60°C   |
| GATA2Ex5(r)   | CAAGCCAAGCTGGATATTGTG   |                        |               |
| GATA2Ex6a(f)  | AGGAAGGAACTGGCCCTCTGA   | 2.0                    | 68°C → 62°C   |
| GATA2Ex6a(r)  | TGTCCGGAGTGGCTGAAGG     |                        |               |
| GATA2Ex6b(f)  | GGAGAAGTCATCCCCCTTCAGTG | 2.0                    | 68°C → 61°C   |
| GATA2Ex6b(r)  | CGGTCCTCGACGTCCATCTGTT  |                        |               |
| GATA2ΔGTCT(f) | GGCCATGTGTGTCGGTGT      | 2.0                    | 68°C → 60°C   |
| GATA2ΔGTCT(r) | TTCCAGGAGTGCTCACACG     |                        |               |

**Supplementary Table 9. Primers for GATA2-responsive promoter or enhancer-luciferase constructs.** Underlined are the *Kpn*I, *Bgl*II and *Sfi*I restriction endonuclease sites used for cloning.

| Primer Name | Primer Sequence                                          |
|-------------|----------------------------------------------------------|
| RUNX1enh-F  | GGGGT <u>ACCC</u> AGTTTCATGTGGGGGTAGG                    |
| RUNX1enh-R  | GAAGAT <u>CTCT</u> CGTAAATTTTGGCCTCCT                    |
| FLI1enh-F   | GGGGT <u>ACCT</u> CCTCCTCGAAATCTTGCTC                    |
| FLI1enh-R   | GAAGAT <u>CTTAG</u> CTCATCGACCCCTGGTA                    |
| LYL1prom-F  | CTCT <u>GGCCTAACTGGCCT</u> ATGTGATCCTGTAGCCAAGAG         |
| LYL1prom-R  | CTCT <u>GGCCGCCGAGGCC</u> CCCAGCACTGTTCTTGCAGCCT         |
| CSF1Rprom-F | CTCT <u>GGCCTAACTGGCC</u> CAGATATGCATTACTTTGGAGATTCCAAGG |
| CSF1Rprom-R | CTCT <u>GGCCGCCGAGGCC</u> CCTCGGTGGGGAAGTGGCA            |

**Supplementary Table 10. Haplotype mapping primers pairs.** Primer pairs were designed to amplify regions flanking the site of the GATA2 p.Thr354Met variant. Following PCR amplification, these amplicons were DNA sequenced and the SNPs identified for haplotype analysis.

| Primer Name | 5' Primer Sequence          | 3' Primer Sequence        |
|-------------|-----------------------------|---------------------------|
| GATA2-SNP1  | TGGTTTACAGTACCTGGAAGGAGAAAG | TCCTGGAAGAGGAGCTGTGTGAC   |
| GATA2-SNP3  | AAACACAACGTAGGGTGGGCACT     | AATGCATCATTTACCACCGCAGAT  |
| GATA2-SNP5  | TTGGAGAAAGACCTATGGACAGCAG   | TCAGAAAGCTTGGGACACGTCTTTA |
| GATA2-SNP7  | TTAGGTTACAAAGGGAGGGCAAACCT  | CACCATTTGACCTGGGTGCTTC    |
| GATA2-Exon5 | CCTGCTGACGCTGCCTTG          | GGTCCCCGTTGGCGTTTC        |
| GATA2-SNP13 | ACAGACGAAGGCAACCATTTTTAGA   | GCTCCTGTGGCTACGTACAATCAAC |
| GATA2-SNP15 | CTGATCACCAATATTTTCATCCATGC  | GCAGAGACTTTGAAGACGATTCAGC |
| GATA2-SNP17 | CTGGAGTGCAGACGTGCTATCAT     | GGCCACAAAATTCAAACTGTTTACC |
| GATA2-SNP18 | GTCGGCCTTCTTCCCTCTGTTT      | AAATAATAGGGTCTGTTGCGGGTTT |
| GATA2-SNP19 | ACAAAAACCTGTCTTCTCTGCCTTG   | CTTCTAAGATTGGAGGTGGGTTTGG |
| GATA2-SNP20 | CTCTCCTTTGTGCCAGCCTCCT      | CTCTCCTAACTCCTGGAGCTTGTGC |

**Supplementary Table 11. Primers for GATA2 mutagenesis.** Nucleotide changes leading to p.Thr354Met and p.Leu359Val mutations (bold underlined). We also introduced a single silent change (underlined) that generated a *Mfe*I site in p.Thr354Met clones and destroyed a *Nar*I site in p.Leu359Val clones.

| Primer Name | Primer Sequence                                                                 |
|-------------|---------------------------------------------------------------------------------|
| T354M-F     | GCACCTGTTGTGCC <u>CA</u> ATTGTCAGAT <u>G</u> GACAACCACCACCTT                    |
| T354M-R     | AAGGTGGTGGTTGTC <u>A</u> TCTGACAATT <u>G</u> GCACAACAGGTGC                      |
| L359V-F     | ATTGTCAGACGACAACCACCACC <u>G</u> TATGGCG <u>A</u> CGAAACGCCAACGGG<br>GACCCTGTCT |
| L359V-R     | AGACAGGGTCCCCGTTGGCGTTTCG <u>I</u> CGCCATA <u>C</u> GGTGGTGGTTGTC<br>GTCTGACAAT |
| 355delT-F   | ATTGTCAGACG ACCACCACCTTATGGCGCCGAAACGCCAACGGGG                                  |
| 355delT-R   | CCCCGTTGGCGTTTCGGCGCCATAAGGTGGTGGT CGTCTGACAAT                                  |

**Supplementary Table 12. Primers for generation of *GATA2* and *GATA2-FLAG* tagged cDNAs.** Underlined are the *Xba*I restriction endonuclease sites used for cloning.

| Primer Name   | Primer Sequence                                                       |
|---------------|-----------------------------------------------------------------------|
| KOZAK-GATA2-F | GTT <u>CTAGAG</u> CCACCATGGAGGTGGCGCCGGA                              |
| GATA2-FLAG-R  | G <u>TTCTAGACT</u> ACTTGTTCATCGTCGTCCTTGTAGTCGCCCATGGCGGTC<br>ACCATGC |
| GATA2-R       | G <u>TTCTAGACT</u> AGCCCATGGCGGTCACCATGC                              |

**Supplementary Table 13. Primers for electromobility shift assay (EMSA). GATA binding sites (underlined).**

| Primer Name                   | Primer Sequence                                |
|-------------------------------|------------------------------------------------|
| Human TCR $\delta$ enhancer-F | CACTT <u>GATA</u> ACAGAAAGT <u>GATA</u> ACTCT  |
| Human TCR $\delta$ enhancer-R | AGAGT <u>TATC</u> ACTTTCTGTT <u>TATC</u> AAGTG |
| GATA Consensus-F              | CAGGGACAT <u>GATA</u> AAGGGAGCCAA              |
| GATA Consensus-R              | TTGGCTCCCTT <u>TATC</u> ATGTCCCTG              |
| Human GM-CSF-153 promoter-F   | TCTCTCGT <u>GATA</u> AAGGATCCTGGA              |
| Human GM-CSF-153 promoter-R   | TCCAGGATCCTT <u>TATC</u> ACGAGAGA              |

## SUPPLEMENTARY NOTE

### a. Clinical information

**Pedigree 1.** Pedigree 1 with MDS transforming to AML was described in 1983<sup>22</sup>. In 1983 there were six individuals who had been diagnosed with leukemia (one with a prior MDS phase) and three with MDS only. A total of 13 family members have now been diagnosed with leukaemia or related disorders (**Fig. 1a**). The diagnoses are summarized in **Supplementary Table 2** and **3**.

The proband (case 18<sup>22</sup>; III-2) had an underlying psoriasis that began at age 18 years. He also presented in 1978 with a five month history of suppurating lesions consisting of 1 cm diameter ulcers with a purulent discharge. These ulcers were responsive to treatment with prednisolone and were most likely due to a neutrophilic dermatosis such as Sweet's syndrome or Pyoderma gangrenosum, which are often associated with an underlying MDS or AML. Blood and bone marrow analyses at the time confirmed an MDS phenotype that later transformed into AML.

His sister (III-4) also had psoriasis and a six year history of raised erythematous lesions prior to a marrow biopsy in 1979 which revealed moderate hypocellularity and dysplastic myeloid and erythroid cells. In 1982, she presented with ulcerating lesions and her bone marrow was hypoplastic and dysplastic, suggestive of MDS. She later developed AML (after publication<sup>22</sup>). Neither psoriasis nor these ulcerating lesions have been documented for other family members suggesting that they may not be linked to the AML predisposition. The psoriasis may be linked to the chromosome 1q variation identified in case 18 (III-2), as this chromosome has been previously linked to this condition<sup>23</sup>. The ulcerating lesions are likely to be due to a neutrophilic dermatosis associated with the MDS in these two individuals, but not linked to the underlying genetic mutation responsible for the AML predisposition.



Recent analysis of the family indicates that both the son and daughter (IV-1 and IV-2) of the proband developed MDS. IV-1 underwent a bone marrow examination which identified refractory cytopenia with multi-lineage dysplasia. His bone marrow was hypocellular with active erythropoiesis and granulopoiesis, moderate dysplasia with macronormoblastic maturation and inadequate hemoglobinization. Cell counts revealed  $3.3 \times 10^9$  cells/l white cells,  $121 \times 10^9$  cells/l platelets, scanty neutrophils and less than 5% blasts. One paratrabecular focus of mononuclear cells, which may represent myeloblasts, was identified. Karyotyping revealed monosomy 7 in all cells and trisomy 21 in a small percentage of cells. He underwent a bone marrow transplantation in 2003 at age 26 years and is currently doing well.

The mother of the proband (II-2) also developed MDS-AML, as did her nephew (III-9). Her three sisters (II-4, II-5 and II-9) all developed AML while her mother (I-2) died of unspecified leukemia. Two of the proband's cousins (III-10 and III-12) died of AML while another cousin (III-13) died of unspecified leukemia.

**Pedigree 2.** This previously undescribed pedigree consists of five affected individuals over three generations (**Fig. 1a**). Individual I-2 suffered of acute leukemia, II-2 of a not further characterized AML, II-4 and III-4 of MDS with monosomy 7 with II-4 having in addition a trisomy 8.

Individual II-5 was a previously well 24 year old man who presented with pancytopenia, peripheral eosinophilia, and recurrent pneumonia in the year preceding his death in 1971. Two separate bone marrow biopsies were notable for hypercellularity with eosinophilia. Karyotype was not performed. Skin biopsy of the scalp showed evidence of hyperkeratosis, papillomatosis, and inflammation. On his final hospital admission, left lung infiltrates were associated with progressive respiratory compromise and lung biopsy revealed chronic interstitial pneumonitis and fibrosis. A diagnosis of "Atypical CML" was made, in part, on the basis of eosinophilic lung infiltrates. The patient was

treated with prednisone for a period before his respiratory status worsened and he developed hepatosplenomegaly. The patient eventually succumbed to an acute hypotensive episode leading to cardiopulmonary arrest.

**Pedigree 3.** This extensively described pedigree has eleven affected individuals over three generations (**Fig. 1a**)<sup>24</sup>. Individual IV-1 had acute megakaryoblastic leukemia (FAB M7) and was transplanted with his brother's (IV-3) bone marrow when 21 years of age and is still alive 18 years later. IV-3 and IV-5 had MDS, III-1, III-4 and III-6 all had MDS evolving into AML, II-3, II-9 had AML, and II-8 died of a not further specified leukemia. Karyotyped individuals IV-1 and IV-5 showed monosomy 7 in the affected cells with IV-1 also displaying trisomy 8 and t(1q:7p).

**Pedigree 4.** This previously undescribed pedigree consists of a father and son with MDS. As both father and son had undergone allogeneic bone marrow transplantation (**Supplementary Table 2**), DNA for the sequence analysis was obtained from buccal cells, confirming that the mutation was constitutional.

With the exception of the p.Thr354Met and p.Thr355del mutations, no other sequence changes in the coding region of *GATA2* were found in the families that we screened. Further, in all disease samples tested, p.Thr354Met and p.Thr355del remained heterozygous. Unfortunately, leukaemia-derived material for genetic analysis from the *GATA2* patients studied here was simply unavailable (most patients died within 2 years of diagnosis), thereby prohibiting unequivocal determination of the existence of somatic mutations in the unaffected allele. Also of note, the FLT3-ITD status of p.Thr354Met family members (Pedigree 1, III-13, IV-2; Pedigree 2, III-4; Pedigree 3, III-6; IV-1) was negative.

**b. High resolution melt mutation screening.** High resolution melt (HRM) analysis on the LC480 Lightcycler (Roche) using a LightCycler® 480 High Resolution Melting Master (Roche) according to the manufacturer's protocol was performed to develop a sensitive screen for mutation detection. Primer pairs were designed across each exon (multiple primer sets were used to span large exons) such that amplicons were no larger than 250 bp (**Supplementary Table 8**). All positive samples containing putative variants were confirmed by DNA sequencing. As a confirmation of the assay for detection of p.Thr354Met mutations, in comparison with DNA sequencing, the HRM assay produced 4% false positives and 0% false negatives (data not shown). All positives were checked by PCR sequencing.

**c. Modeling of GATA structure.** The human GATA2 C-terminal zinc finger protein sequence was uploaded to Swiss Model (an automated comparative protein modeling server). This generated a GATA2 ZF model based on PDB code:3dfx (mouse Gata3<sup>25</sup>; 97% sequence identity, Fig. 1E; E-value  $8.6 \times 10^{-21}$ ). We used the PyMol program to visualise and predict the effects of the p.Thr354Met mutation<sup>26</sup>. The PDB file is available upon request.

**d. Determination of genes differentially expressed in the presence of GATA2 mutants.** HL-60 cell lines were treated with 100 nM 4HT to turn on GATA2 WT and mutant protein expression. After 24 h, gene expression levels were determined by microarray. Total RNA was purified using the RNeasy protocol (Qiagen) and converted to biotinylated sense DNA as per the Affymetrix Genechip Whole Transcript (WT) Sense Target Labeling Assay manual. Genechips were hybridized overnight at 45°C for 17 h in an Affymetrix Hybridization oven, washed and scanned using the Affymetrix GSC3000 scanner.

Raw microarray data were normalized with robust multichip average (RMA) methods<sup>27</sup> using aroma.affymetrix analysis<sup>28</sup>. Quality control was assessed using normalized unscaled standard error

(NUSE) plot as implemented in *aroma.affymetrix* analysis. Batch effect was removed using ComBat analysis<sup>29</sup>. The differential gene expression was determined with the Empirical Bayes and moderated t-statistic using linear model for microarray analysis (LIMMA)<sup>30</sup>. Differential gene expression was adjusted for multiple testing to control the false discovery rate (FDR) using Benjamini-Hochberg method<sup>31</sup>. Genes with FDR  $p < 0.05$  were considered statistical significant. All statistical analyses were performed using R statistical software.

A number of analyses including ChIP Enrichment Analysis, Motif Activity Response Analysis and Gene Set Enrichment Analysis (see URLs) were performed on these array data. Among the patterns revealed were targets of the MYC oncogene such as numerous ribosomal proteins as a predominant feature for GATA2 WT, but not for p.Thr354Met or p.Thr355del. Indeed, MYC expression in our arrays is down regulated by GATA2 WT, but not by p.Thr354Met or p.Thr355del (**Supplementary Table 6**) consistent with repression of *MYC* by GATA2 WT being abrogated in p.Thr354Met and p.Thr355del.

**URLs:** ChIP Enrichment Analysis, <http://amp.pharm.mssm.edu/lib/chea.jsp>; Motif Activity Response Analysis, <http://test.swissregulon.unibas.ch/cgi-bin/mara>; Gene Set Enrichment Analysis, <http://www.broadinstitute.org/gsea/index.jsp>.

## SUPPLEMENTARY REFERENCES

1. Brown, A.L. et al. Genetic regulators of myelopoiesis and leukemic signaling identified by gene profiling and linear modeling. *J. Leukoc. Biol.* **80**, 433-447 (2006).
2. Rozen, S. & Skaletsky, H. Primer3 on the WWW for general users and for biologist programmers. *Methods Mol. Biol.* **132**, 365-386 (2000).
3. Crossley, M., Merika, M. & Orkin, S.H. Self-association of the erythroid transcription factor GATA-1 mediated by its zinc finger domains. *Mol. Cell. Biol.* **15**, 2448-2456 (1995).
4. Zhang, P. et al. Negative cross-talk between hematopoietic regulators: GATA proteins repress PU.1. *Proc. Natl. Acad. Sci. U.S.A.* **96**, 8705-8710 (1999).
5. Freson, K. et al. Molecular cloning and characterization of the GATA1 cofactor human FOG1 and assessment of its binding to GATA1 proteins carrying D218 substitutions. *Hum. Genet.* **112**, 42-9 (2003).
6. Tevosian, S.G. et al. FOG-2: A novel GATA-family cofactor related to multitype zinc-finger proteins Friend of GATA-1 and U-shaped. *Proc. Natl. Acad. Sci. U.S.A.* **96**, 950-5 (1999).
7. Lecuyer, E. et al. The SCL complex regulates c-kit expression in hematopoietic cells through functional interaction with Sp1. *Blood* **100**, 2430-40 (2002).
8. Tsuzuki, S., Towatari, M., Saito, H. & Enver, T. Potentiation of GATA-2 activity through interactions with the promyelocytic leukemia protein (PML) and the t(15;17)-generated PML-retinoic acid receptor alpha oncoprotein. *Mol. Cell. Biol.* **20**, 6276-86 (2000).
9. Tsuzuki, S. & Enver, T. Interactions of GATA-2 with the promyelocytic leukemia zinc finger (PLZF) protein, its homologue FAZF, and the t(11;17)-generated PLZF-retinoic acid receptor alpha oncoprotein. *Blood* **99**, 3404-10 (2002).
10. Tsuzuki, S. et al. Cross talk between retinoic acid signaling and transcription factor GATA-2. *Mol. Cell. Biol.* **24**, 6824-36 (2004).
11. Pimanda, J.E. et al. Gata2, Fli1, and Scl form a recursively wired gene-regulatory circuit during early hematopoietic development. *Proc. Natl. Acad. Sci. U.S.A.* **104**, 17692-17697 (2007).
12. Qiu, Z., Dyer, K.D., Xie, Z., Radinger, M. & Rosenberg, H.F. GATA transcription factors regulate the expression of the human eosinophil-derived neurotoxin (RNase 2) gene. *J. Biol. Chem.* **284**, 13099-109 (2009).
13. Nottingham, W.T. et al. Runx1-mediated hematopoietic stem-cell emergence is controlled by a Gata/Ets/SCL-regulated enhancer. *Blood* **110**, 4188-4197 (2007).
14. Soliera, A.R. et al. Transcriptional repression of c-Myb and GATA-2 is involved in the biologic effects of C/EBPalpha in p210BCR/ABL-expressing cells. *Blood* **112**, 1942-1950 (2008).
15. Huang, Z. et al. GATA-2 reinforces megakaryocyte development in the absence of GATA-1. *Mol. Cell. Biol.* **29**, 5168-80 (2009).
16. Kitajima, K. et al. Redirecting differentiation of hematopoietic progenitors by a transcription factor, GATA-2. *Blood* **107**, 1857-1863 (2006).
17. Gaines, P., Geiger, J.N., Knudsen, G., Seshasayee, D. & Wojchowski, D.M. GATA-1- and FOG-dependent activation of megakaryocytic alpha IIB gene expression. *J. Biol. Chem.* **275**, 34114-21 (2000).
18. Tavor, S. et al. Restoration of C/EBPalpha expression in a BCR-ABL+ cell line induces terminal granulocytic differentiation. *J. Biol. Chem.* **278**, 52651-9 (2003).
19. Dorsam, S.T. et al. The transcriptome of the leukemogenic homeoprotein HOXA9 in human hematopoietic cells. *Blood* **103**, 1676-1684 (2004).
20. Shimahara, A., Yamakawa, N., Nishikata, I. & Morishita, K. Acetylation of lysine 564 adjacent to the C-terminal binding protein-binding motif in EVI1 is crucial for transcriptional activation of GATA2. *J. Biol. Chem.* **285**, 16967-77 (2010).

21. Robert-Moreno, A. et al. Impaired embryonic haematopoiesis yet normal arterial development in the absence of the Notch ligand Jagged1. *EMBO J.* **27**, 1886-1895 (2008).
22. Robinson, C.W., Norman, J.E., Cleland, L.G. & Ford, J.H. Dermal necrosis and chromosome Iq abnormality in a man with a familial myeloproliferative disorder. *Aust. N. Z. J. Med.* **13**, 141-145 (1983).
23. Capon, F. et al. Fine mapping of the PSORS4 psoriasis susceptibility region on chromosome 1q21. *J. Invest. Dermatol.* **116**, 728-30 (2001).
24. Horwitz, M., Sabath, D.E., Smithson, W.A. & Radich, J. A family inheriting different subtypes of acute myelogenous leukemia. *Am.J.Hematol.* **52**, 295-304 (1996).
25. Bates, D.L., Chen, Y., Kim, G., Guo, L. & Chen, L. Crystal structures of multiple GATA zinc fingers bound to DNA reveal new insights into DNA recognition and self-association by GATA. *J. Mol. Biol.* **381**, 1292-1306 (2008).
26. Liang, M.P., Banatao, D.R., Klein, T.E., Brutlag, D.L. & Altman, R.B. WebFEATURE: An interactive web tool for identifying and visualizing functional sites on macromolecular structures. *Nucleic Acids Res.* **31**, 3324-3327 (2003).
27. Irizarry, R.A. et al. Exploration, normalization, and summaries of high density oligonucleotide array probe level data. *Biostatistics* **4**, 249-64 (2003).
28. Bengtsson, H., Simpson, K., Bullard, J. & Hansen, K. aroma.affymetrix: A generic framework in R for analyzing small to very large Affymetrix data sets in bounded memory. (Department of Statistics, University of California, Berkeley, 2008).
29. Johnson, W.E., Li, C. & Rabinovic, A. Adjusting batch effects in microarray expression data using empirical Bayes methods. *Biostatistics* **8**, 118-27 (2007).
30. Smyth, G.K. Linear models and empirical bayes methods for assessing differential expression in microarray experiments. *Stat Appl Genet Mol Biol* **3**, Article3 (2004).
31. Benjamini, Y. & Hochberg, Y. Controlling the False Discovery Rate: A Practical and Powerful Approach to Multiple Testing. *J Royal Stat Soc.* **57**, 289-300 (1995).
